# Supplementary material for: Transcriptome analysis reveals candidate genes involved in luciferin metabolism in Luciola aquatilis (Coleoptera: Lampyridae)
Source: PeerJ. 2016 Oct 4;4:e2534. doi: 10.7717/peerj.2534 (PMC5068357; doi:10.7717/peerj.2534)
Supplement: File S2 [file peerj-04-2534-s002.xlsx]

## Sheet: NR_50%Identity
Transcript ID	Transdecoder ID	FPKM	Protein function and description	%Identity	E-value
c100_g1_i1	c100_g1_i1|m.30	2.7	gi|91086611|ref|XP_974024.1|PREDICTED: NF-kappa-B inhibitor-interacting Ras-like protein 2 [Tribolium castaneum]	70.71	1e-93
c10000_g1_i1	c10000_g1_i1|m.6553	1.67	gi|642912518|ref|XP_008200898.1|PREDICTED: lysine-specific histone demethylase 1A [Tribolium castaneum]	84.3	0
c10004_g1_i1	c10004_g1_i1|m.6556	113.36	gi|642921188|ref|XP_008192753.1|PREDICTED: reticulon-1-A-like isoform X3 [Tribolium castaneum]	77.38	2e-136
c10004_g1_i2	c10004_g1_i2|m.6557	123.78	gi|642921192|ref|XP_008192755.1|PREDICTED: reticulon-1-A-like isoform X5 [Tribolium castaneum]	83.1	1e-116
c10004_g1_i3	c10004_g1_i3|m.6558	76.36	gi|189236779|ref|XP_967166.2|PREDICTED: reticulon-1-like isoform X1 [Tribolium castaneum]	55.68	4e-144
c10005_g1_i1	c10005_g1_i1|m.6559	20.88	gi|91093479|ref|XP_968090.1|PREDICTED: uncharacterized protein LOC656468 [Tribolium castaneum]	67.27	9e-60
c10008_g1_i1	c10008_g1_i1|m.6562	579.12	gi|156564242|ref|NP_001096047.1|chitin deacetylase 2 isoform A precursor [Tribolium castaneum]	86.92	0
c10008_g1_i2	c10008_g1_i2|m.6563	588.17	gi|170784826|ref|NP_001116303.1|chitin deacetylase 2 isoform B precursor [Tribolium castaneum]	89.58	0
c10011_g1_i1	c10011_g1_i1|m.6568	31.36	gi|642930465|ref|XP_974795.3|PREDICTED: protein YIF1B [Tribolium castaneum]	60.64	6e-141
c10012_g1_i1	c10012_g1_i1|m.6569	2.58	gi|91080109|ref|XP_967250.1|PREDICTED: uncharacterized protein LOC655596 isoform X1 [Tribolium castaneum]	69.33	0
c10013_g1_i1	c10013_g1_i1|m.6571	17.43	gi|642914975|ref|XP_008190466.1|PREDICTED: sialic acid synthase [Tribolium castaneum]	61	2e-141
c10014_g1_i1	c10014_g1_i1|m.6572	2.74	gi|642935142|ref|XP_008197905.1|PREDICTED: putative acyl-activating enzyme 19 [Tribolium castaneum]	62.12	0
c10016_g1_i1	c10016_g1_i1|m.6577	4.32	gi|91076478|ref|XP_972409.1|PREDICTED: slit homolog 3 protein [Tribolium castaneum]	80.17	0
c10017_g1_i1	c10017_g1_i1|m.6579	2.44	gi|642910643|ref|XP_008200041.1|PREDICTED: LOW QUALITY PROTEIN: plexin-B [Tribolium castaneum]	83.83	0
c10019_g2_i2	c10019_g2_i2|m.6581	12.42	gi|642915059|ref|XP_008190392.1|PREDICTED: leucine-rich repeat-containing protein ODA7 isoform X2 [Tribolium castaneum]	57.09	2e-95
c10021_g1_i1	c10021_g1_i1|m.6596	6.53	gi|189235566|ref|XP_970111.2|PREDICTED: sphingosine kinase 2 [Tribolium castaneum]	67.18	0
c10025_g1_i1	c10025_g1_i1|m.6598	1.86	gi|642923261|ref|XP_008193681.1|PREDICTED: T-cell activation inhibitor, mitochondrial [Tribolium castaneum]	56.93	0
c10025_g1_i2	c10025_g1_i2|m.6599	1.8	gi|642923261|ref|XP_008193681.1|PREDICTED: T-cell activation inhibitor, mitochondrial [Tribolium castaneum]	56.56	2e-135
c1003_g2_i1	c1003_g2_i1|m.281	0.93	gi|642927361|ref|XP_008195237.1|PREDICTED: 2-hydroxyacylsphingosine 1-beta-galactosyltransferase-like [Tribolium castaneum]	51	4e-25
c10030_g1_i1	c10030_g1_i1|m.6608	11.64	gi|270006918|gb|EFA03366.1|hypothetical protein TcasGA2_TC013351 [Tribolium castaneum]	56.56	1e-122
c10032_g1_i1	c10032_g1_i1|m.6610	34.46	gi|91076592|ref|XP_968333.1|PREDICTED: charged multivesicular body protein 5 [Tribolium castaneum]	83.26	1e-132
c10033_g1_i1	c10033_g1_i1|m.6611	30.36	gi|817186840|ref|XP_012287940.1|PREDICTED: RING-box protein 1A [Orussus abietinus]	97.35	1e-75
c10034_g3_i1	c10034_g3_i1|m.6612	0.9	gi|910311198|ref|XP_013162728.1|PREDICTED: gastrula zinc finger protein XlCGF57.1-like [Papilio xuthus]	50.59	2e-46
c10034_g3_i2	c10034_g3_i2|m.6613	0.5	gi|260823072|ref|XP_002604007.1|hypothetical protein BRAFLDRAFT_57768 [Branchiostoma floridae]	51.13	1e-39
c10036_g1_i1	c10036_g1_i1|m.6614	31.33	gi|325302862|tpg|DAA34458.1|TPA_exp: amino acid transporter [Amblyomma variegatum]	50	2e-30
c10037_g1_i1	c10037_g1_i1|m.6615	5.19	gi|642913781|ref|XP_008201158.1|PREDICTED: programmed cell death protein 2-like [Tribolium castaneum]	62.59	1e-173
c10038_g1_i1	c10038_g1_i1|m.6616	58.07	gi|270015067|gb|EFA11515.1|hypothetical protein TcasGA2_TC014229, partial [Tribolium castaneum]	55.12	6e-144
c10040_g1_i1	c10040_g1_i1|m.6617	322.58	gi|91078970|ref|XP_974395.1|PREDICTED: uncharacterized protein LOC663246 [Tribolium castaneum]	56.8	5e-121
c10041_g1_i1	c10041_g1_i1|m.6619	112.72	gi|266484|sp|Q01158.1|LUCI_LUCLARecName: Full=Luciferin 4-monooxygenase; Short=Luciferase [Luciola lateralis]	83.67	0
c10042_g1_i1	c10042_g1_i1|m.6620	5.04	gi|189240781|ref|XP_969579.2|PREDICTED: inositol hexakisphosphate kinase 1 isoform X2 [Tribolium castaneum]	70.31	0
c10042_g1_i2	c10042_g1_i2|m.6621	2.89	gi|189240781|ref|XP_969579.2|PREDICTED: inositol hexakisphosphate kinase 1 isoform X2 [Tribolium castaneum]	79.38	4e-46
c10043_g1_i1	c10043_g1_i1|m.6622	117	gi|642931000|ref|XP_008196172.1|PREDICTED: uncharacterized protein LOC103313785 [Tribolium castaneum]	55.17	6e-52
c10044_g1_i1	c10044_g1_i1|m.6623	32.64	gi|91084971|ref|XP_972074.1|PREDICTED: putative tricarboxylate transport protein, mitochondrial [Tribolium castaneum]	79.74	0
c10044_g1_i2	c10044_g1_i2|m.6624	34.11	gi|91084971|ref|XP_972074.1|PREDICTED: putative tricarboxylate transport protein, mitochondrial [Tribolium castaneum]	79.74	0
c10045_g1_i1	c10045_g1_i1|m.6626	317.5	gi|221048065|gb|ACL98140.1|ubiquitin C variant, partial [Epinephelus coioides]	100	6e-169
c10045_g1_i2	c10045_g1_i2|m.6627	285.41	gi|164430972|gb|ABY55758.1|ubiquitin [Drosophila silvestris]	100	1e-118
c10047_g1_i1	c10047_g1_i1|m.6629	1.71	gi|189240775|ref|XP_969219.2|PREDICTED: pancreatic triacylglycerol lipase-like [Tribolium castaneum]	63.95	7e-160
c10047_g2_i1	c10047_g2_i1|m.6630	1.65	gi|512929845|ref|XP_004931923.1|PREDICTED: pancreatic triacylglycerol lipase-like [Bombyx mori]	65.96	2e-82
c10048_g1_i1	c10048_g1_i1|m.6631	50.17	gi|189241532|ref|XP_969755.2|PREDICTED: transmembrane emp24 domain-containing protein 3 [Tribolium castaneum]	82.05	1e-119
c10049_g1_i1	c10049_g1_i1|m.6632	17.56	gi|642939095|ref|XP_008200219.1|PREDICTED: AH receptor-interacting protein [Tribolium castaneum]	64.24	1e-152
c10049_g1_i2	c10049_g1_i2|m.6633	15.4	gi|642939095|ref|XP_008200219.1|PREDICTED: AH receptor-interacting protein [Tribolium castaneum]	64.66	2e-122
c10050_g1_i1	c10050_g1_i1|m.6634	9.71	gi|91084983|ref|XP_972380.1|PREDICTED: transmembrane protein 134 [Tribolium castaneum]	70.12	1e-79
c10054_g1_i1	c10054_g1_i1|m.6638	27.96	gi|795017177|ref|XP_011858758.1|PREDICTED: proteasome maturation protein [Vollenhovia emeryi]	64.34	5e-52
c10056_g1_i1	c10056_g1_i1|m.6639	8.18	gi|91087337|ref|XP_975603.1|PREDICTED: enolase-phosphatase E1-like [Tribolium castaneum]	52.42	2e-77
c10056_g1_i2	c10056_g1_i2|m.6641	13.2	gi|91087337|ref|XP_975603.1|PREDICTED: enolase-phosphatase E1-like [Tribolium castaneum]	52.36	4e-74
c10058_g1_i1	c10058_g1_i1|m.6644	14.99	gi|642936600|ref|XP_008198502.1|PREDICTED: NECAP-like protein CG9132 [Tribolium castaneum]	76.23	4e-123
c10059_g1_i1	c10059_g1_i1|m.6645	540.15	gi|91088011|ref|XP_973916.1|PREDICTED: 40S ribosomal protein S26 [Tribolium castaneum]	94.83	3e-72
c10061_g1_i1	c10061_g1_i1|m.6647	136.63	gi|91080939|ref|XP_974274.1|PREDICTED: signal peptidase complex subunit 3 [Tribolium castaneum]	91.62	2e-108
c10062_g1_i3	c10062_g1_i3|m.6649	0.41	gi|908472411|ref|XP_013089011.1|PREDICTED: RNA-directed DNA polymerase homolog [Biomphalaria glabrata]	71.43	2e-48
c10065_g1_i1	c10065_g1_i1|m.6651	2.95	gi|642931832|ref|XP_008196749.1|PREDICTED: GPI inositol-deacylase [Tribolium castaneum]	50.38	0
c10066_g1_i1	c10066_g1_i1|m.6654	1.33	gi|642935034|ref|XP_008199914.1|PREDICTED: complexin isoform X1 [Tribolium castaneum]	96.4	2e-85
c10066_g1_i2	c10066_g1_i2|m.6655	2.1	gi|253683501|ref|NP_001156645.1|complexin [Acyrthosiphon pisum]	85.47	2e-47
c10066_g1_i3	c10066_g1_i3|m.6656	1.13	gi|642935034|ref|XP_008199914.1|PREDICTED: complexin isoform X1 [Tribolium castaneum]	96.4	2e-85
c10067_g1_i1	c10067_g1_i1|m.6657	5.99	gi|91082217|ref|XP_972523.1|PREDICTED: protein FAM210B [Tribolium castaneum]	61.86	1e-40
c10069_g1_i1	c10069_g1_i1|m.6660	28.03	gi|91084965|ref|XP_971914.1|PREDICTED: transmembrane emp24 domain-containing protein 2 [Tribolium castaneum]	73.65	3e-66
c10069_g1_i2	c10069_g1_i2|m.6662	46.7	gi|91084965|ref|XP_971914.1|PREDICTED: transmembrane emp24 domain-containing protein 2 [Tribolium castaneum]	81	2e-111
c10070_g1_i1	c10070_g1_i1|m.6664	28.25	gi|91083141|ref|XP_971340.1|PREDICTED: akirin [Tribolium castaneum]	68.65	7e-75
c10072_g1_i1	c10072_g1_i1|m.6665	12.01	gi|91081787|ref|XP_973692.1|PREDICTED: uncharacterized protein LOC662508 [Tribolium castaneum]	64.06	2e-121
c10073_g1_i1	c10073_g1_i1|m.6667	166.7	gi|642919219|ref|XP_969254.2|PREDICTED: peroxiredoxin-5, mitochondrial [Tribolium castaneum]	70.74	1e-94
c10074_g1_i1	c10074_g1_i1|m.6669	10.74	gi|642914203|ref|XP_008201588.1|PREDICTED: zinc finger and BTB domain-containing protein 40 isoform X3 [Tribolium castaneum]	73.91	3e-83
c10074_g1_i2	c10074_g1_i2|m.6670	13.48	gi|642914203|ref|XP_008201588.1|PREDICTED: zinc finger and BTB domain-containing protein 40 isoform X3 [Tribolium castaneum]	73.91	9e-84
c10074_g1_i3	c10074_g1_i3|m.6671	25.76	gi|270001571|gb|EEZ98018.1|hypothetical protein TcasGA2_TC000418 [Tribolium castaneum]	76.64	7e-58
c10075_g1_i1	c10075_g1_i1|m.6672	12.43	gi|156545968|ref|XP_001606521.1|PREDICTED: ras-like protein 1 [Nasonia vitripennis]	87.76	1e-110
c10077_g1_i1	c10077_g1_i1|m.6673	4.24	gi|91088189|ref|XP_972722.1|PREDICTED: dehydrodolichyl diphosphate synthase [Tribolium castaneum]	57.99	4e-122
c10078_g1_i1	c10078_g1_i1|m.6675	17.04	gi|332374058|gb|AEE62170.1|unknown [Dendroctonus ponderosae]	60.94	1e-140
c10079_g1_i1	c10079_g1_i1|m.6676	108.62	gi|195127393|ref|XP_002008153.1|GI13337 [Drosophila mojavensis]	71	2e-104
c10080_g1_i1	c10080_g1_i1|m.6677	3.92	gi|568252659|gb|ETN61953.1|N-acetylglucosamine-6-phosphate deacetylase [Anopheles darlingi]	66.92	0
c10081_g1_i1	c10081_g1_i1|m.6678	33.93	gi|642912056|ref|XP_008199074.1|PREDICTED: nuclear factor 1 C-type isoform X6 [Tribolium castaneum]	82.48	7e-168
c10081_g1_i1	c10081_g1_i1|m.6679	33.93	gi|478254026|gb|ENN74318.1|hypothetical protein YQE_09289, partial [Dendroctonus ponderosae]	61.54	5e-41
c10081_g2_i1	c10081_g2_i1|m.6681	24.7	gi|642912052|ref|XP_008199072.1|PREDICTED: nuclear factor 1 B-type isoform X4 [Tribolium castaneum]	97.69	3e-154
c10083_g1_i1	c10083_g1_i1|m.6685	56.42	gi|270008934|gb|EFA05382.1|hypothetical protein TcasGA2_TC015554 [Tribolium castaneum]	52.51	4e-90
c10085_g1_i1	c10085_g1_i1|m.6686	1.86	gi|642933924|ref|XP_008197569.1|PREDICTED: protein Skeletor, isoforms B/C isoform X1 [Tribolium castaneum]	78.46	0
c10086_g1_i1	c10086_g1_i1|m.6687	4.12	gi|642933386|ref|XP_008197395.1|PREDICTED: HEAT repeat-containing protein 2 [Tribolium castaneum]	57.28	0
c10086_g2_i1	c10086_g2_i1|m.6688	2.29	gi|642933386|ref|XP_008197395.1|PREDICTED: HEAT repeat-containing protein 2 [Tribolium castaneum]	61.62	2e-29
c10087_g1_i1	c10087_g1_i1|m.6689	11.9	gi|91088843|ref|XP_966427.1|PREDICTED: ankyrin repeat domain-containing protein 40 isoform X1 [Tribolium castaneum]	64.4	6e-106
c10089_g2_i1	c10089_g2_i1|m.6691	2.92	gi|270007658|gb|EFA04106.1|hypothetical protein TcasGA2_TC014343 [Tribolium castaneum]	69.07	0
c10090_g2_i1	c10090_g2_i1|m.6693	1.46	gi|817183524|ref|XP_012276864.1|PREDICTED: facilitated trehalose transporter Tret1-2 homolog [Orussus abietinus]	50	7e-27
c10091_g1_i1	c10091_g1_i1|m.6695	48.94	gi|91089709|ref|XP_974931.1|PREDICTED: eukaryotic translation initiation factor 4E-binding protein 2 [Tribolium castaneum]	54.7	1e-32
c10092_g1_i1	c10092_g1_i1|m.6696	61.29	gi|170040045|ref|XP_001847824.1|synaptic glycoprotein SC2 [Culex quinquefasciatus]	61.54	5e-137
c10094_g1_i1	c10094_g1_i1|m.6697	1.72	gi|91078878|ref|XP_972869.1|PREDICTED: E3 ubiquitin-protein ligase NRDP1 isoform X2 [Tribolium castaneum]	85.08	0
c10094_g1_i2	c10094_g1_i2|m.6698	1.63	gi|91078878|ref|XP_972869.1|PREDICTED: E3 ubiquitin-protein ligase NRDP1 isoform X2 [Tribolium castaneum]	85.71	0
c10095_g1_i1	c10095_g1_i1|m.6699	1.5	gi|642910444|ref|XP_008190740.1|PREDICTED: major facilitator superfamily domain-containing protein 6-like [Tribolium castaneum]	64.67	0
c10096_g1_i1	c10096_g1_i1|m.6701	1.71	gi|642920570|ref|XP_008192465.1|PREDICTED: synaptotagmin 1 isoform X1 [Tribolium castaneum]	88.69	0
c10096_g1_i2	c10096_g1_i2|m.6702	1.72	gi|642920570|ref|XP_008192465.1|PREDICTED: synaptotagmin 1 isoform X1 [Tribolium castaneum]	88.69	0
c10097_g1_i1	c10097_g1_i1|m.6703	1.94	gi|642920839|ref|XP_008192579.1|PREDICTED: facilitated trehalose transporter Tret1-like [Tribolium castaneum]	52.78	2e-161
c10098_g1_i1	c10098_g1_i1|m.6704	4.29	gi|332372832|gb|AEE61558.1|unknown [Dendroctonus ponderosae]	51.65	6e-53
c10099_g1_i1	c10099_g1_i1|m.6705	3.04	gi|642914756|ref|XP_008190340.1|PREDICTED: AT-rich interactive domain-containing protein 5B [Tribolium castaneum]	61.62	0
c10100_g1_i1	c10100_g1_i1|m.6707	20.76	gi|546684335|gb|ERL94040.1|hypothetical protein D910_11323 [Dendroctonus ponderosae]	70.49	6e-145
c10101_g1_i1	c10101_g1_i1|m.6708	15.49	gi|91090426|ref|XP_971543.1|PREDICTED: ADP-ribosylation factor-like protein 6-interacting protein 1 isoform X2 [Tribolium castaneum]	50.84	4e-63
c10103_g1_i1	c10103_g1_i1|m.6710	164.93	gi|91081869|ref|XP_968358.1|PREDICTED: ATP synthase subunit g, mitochondrial [Tribolium castaneum]	66.67	3e-42
c10104_g1_i1	c10104_g1_i1|m.6711	2.39	gi|817051597|ref|XP_012251875.1|PREDICTED: probable multidrug resistance-associated protein lethal(2)03659 [Athalia rosae]	67.93	0
c10105_g1_i1	c10105_g1_i1|m.6712	5.18	gi|91080973|ref|XP_974893.1|PREDICTED: probable glutamine-dependent NAD(+) synthetase [Tribolium castaneum]	74.72	0
c10107_g1_i1	c10107_g1_i1|m.6714	3.53	gi|91079490|ref|XP_968591.1|PREDICTED: ADP-ribosylation factor-like protein 6-interacting protein 4 [Tribolium castaneum]	80.26	5e-39
c10108_g1_i1	c10108_g1_i1|m.6715	34.02	gi|646718026|gb|KDR20659.1|Charged multivesicular body protein 1b [Zootermopsis nevadensis]	83.58	7e-116
c10109_g1_i1	c10109_g1_i1|m.6716	5.55	gi|642913783|ref|XP_008201159.1|PREDICTED: ADAM 17-like protease isoform X1 [Tribolium castaneum]	78.01	0
c10110_g1_i1	c10110_g1_i1|m.6717	7.91	gi|642926488|ref|XP_008191976.1|PREDICTED: probable ATP-dependent RNA helicase kurz [Tribolium castaneum]	65.15	0
c10112_g1_i1	c10112_g1_i1|m.6721	6.96	gi|91086315|ref|XP_973973.1|PREDICTED: vesicle transport protein USE1 [Tribolium castaneum]	59.63	7e-76
c10113_g2_i1	c10113_g2_i1|m.6722	10.96	gi|270008934|gb|EFA05382.1|hypothetical protein TcasGA2_TC015554 [Tribolium castaneum]	52.05	6e-58
c10114_g1_i1	c10114_g1_i1|m.6723	3.46	gi|780715063|ref|XP_011705491.1|PREDICTED: neprilysin-like [Wasmannia auropunctata]	61.63	1e-74
c10114_g1_i2	c10114_g1_i2|m.6724	4.24	gi|270006672|gb|EFA03120.1|hypothetical protein TcasGA2_TC013030 [Tribolium castaneum]	62.71	1e-37
c10115_g1_i1	c10115_g1_i1|m.6725	4.5	gi|646689434|gb|KDR06592.1|F-box/LRR-repeat protein 7 [Zootermopsis nevadensis]	81.14	0
c10115_g1_i1	c10115_g1_i1|m.6726	4.5	gi|91094271|ref|XP_970021.1|PREDICTED: F-box/LRR-repeat protein 7 [Tribolium castaneum]	53.73	1e-08
c10116_g1_i1	c10116_g1_i1|m.6727	18.48	gi|795057441|ref|XP_011872186.1|PREDICTED: uncharacterized protein LOC105564440 [Vollenhovia emeryi]	51.53	2e-47
c10116_g1_i2	c10116_g1_i2|m.6728	14.87	gi|795057441|ref|XP_011872186.1|PREDICTED: uncharacterized protein LOC105564440 [Vollenhovia emeryi]	51.53	2e-47
c10117_g1_i1	c10117_g1_i1|m.6729	3.9	gi|91083243|ref|XP_973851.1|PREDICTED: guanine nucleotide-binding protein subunit beta-2 [Tribolium castaneum]	80.69	0
c10117_g1_i2	c10117_g1_i2|m.6730	2.72	gi|91083243|ref|XP_973851.1|PREDICTED: guanine nucleotide-binding protein subunit beta-2 [Tribolium castaneum]	80.89	0
c10118_g1_i1	c10118_g1_i1|m.6731	1.85	gi|644995460|ref|XP_008208839.1|PREDICTED: uncharacterized protein LOC100115191 isoform X2 [Nasonia vitripennis]	50.57	8e-19
c10119_g1_i1	c10119_g1_i1|m.6732	5.14	gi|91089285|ref|XP_970985.1|PREDICTED: cytoplasmic phosphatidylinositol transfer protein 1 [Tribolium castaneum]	71.71	3e-161
c10119_g1_i2	c10119_g1_i2|m.6733	4.21	gi|91089285|ref|XP_970985.1|PREDICTED: cytoplasmic phosphatidylinositol transfer protein 1 [Tribolium castaneum]	66.81	1e-107
c10120_g1_i2	c10120_g1_i2|m.6734	8.3	gi|91084105|ref|XP_975991.1|PREDICTED: neprilysin-2 isoform X3 [Tribolium castaneum]	72.19	0
c10120_g1_i3	c10120_g1_i3|m.6735	7.87	gi|642924917|ref|XP_008194096.1|PREDICTED: neprilysin-2 isoform X2 [Tribolium castaneum]	72.05	0
c10120_g1_i4	c10120_g1_i4|m.6736	7.9	gi|642924917|ref|XP_008194096.1|PREDICTED: neprilysin-2 isoform X2 [Tribolium castaneum]	70.51	0
c10121_g1_i1	c10121_g1_i1|m.6737	7.83	gi|642923303|ref|XP_008193695.1|PREDICTED: solute carrier family 25 member 51 [Tribolium castaneum]	60	1e-118
c10122_g1_i1	c10122_g1_i1|m.6738	4.21	gi|189238823|ref|XP_976228.2|PREDICTED: lysM and putative peptidoglycan-binding domain-containing protein 3 [Tribolium castaneum]	52.28	7e-62
c10123_g1_i1	c10123_g1_i1|m.6739	2	gi|642933291|ref|XP_008197359.1|PREDICTED: cytochrome b5 reductase 4 isoform X2 [Tribolium castaneum]	53.21	2e-141
c10123_g2_i1	c10123_g2_i1|m.6740	2.14	gi|642933291|ref|XP_008197359.1|PREDICTED: cytochrome b5 reductase 4 isoform X2 [Tribolium castaneum]	55.33	8e-51
c10124_g1_i1	c10124_g1_i1|m.6741	1.91	gi|270014080|gb|EFA10528.1|hypothetical protein TcasGA2_TC012780 [Tribolium castaneum]	87.3	9e-146
c10124_g2_i1	c10124_g2_i1|m.6742	0.86	gi|270014080|gb|EFA10528.1|hypothetical protein TcasGA2_TC012780 [Tribolium castaneum]	79.73	0
c10124_g2_i2	c10124_g2_i2|m.6744	1.87	gi|642936312|ref|XP_008198391.1|PREDICTED: dedicator of cytokinesis protein 3 [Tribolium castaneum]	77.16	0
c10125_g1_i1	c10125_g1_i1|m.6746	1.51	gi|642919953|ref|XP_008192142.1|PREDICTED: protein ovo isoform X4 [Tribolium castaneum]	72	0
c10125_g1_i2	c10125_g1_i2|m.6749	1.76	gi|642919949|ref|XP_008192140.1|PREDICTED: protein ovo isoform X2 [Tribolium castaneum]	73.51	0
c10127_g1_i1	c10127_g1_i1|m.6753	41.88	gi|91085175|ref|XP_971032.1|PREDICTED: ubiquitin-conjugating enzyme E2 G1 [Tribolium castaneum]	97.01	2e-116
c10128_g1_i1	c10128_g1_i1|m.6755	145.64	gi|646717983|gb|KDR20638.1|Lysosome-associated membrane glycoprotein 1 [Zootermopsis nevadensis]	50.86	6e-29
c10129_g1_i1	c10129_g1_i1|m.6756	4.4	gi|270015031|gb|EFA11479.1|hypothetical protein TcasGA2_TC014190 [Tribolium castaneum]	74.74	4e-88
c10129_g1_i2	c10129_g1_i2|m.6757	4.73	gi|642911031|ref|XP_008193516.1|PREDICTED: cytoplasmic polyadenylation element-binding protein 2 [Tribolium castaneum]	89.56	0
c10129_g1_i3	c10129_g1_i3|m.6758	4.42	gi|642911031|ref|XP_008193516.1|PREDICTED: cytoplasmic polyadenylation element-binding protein 2 [Tribolium castaneum]	81.23	0
c10129_g1_i4	c10129_g1_i4|m.6759	3.84	gi|642911031|ref|XP_008193516.1|PREDICTED: cytoplasmic polyadenylation element-binding protein 2 [Tribolium castaneum]	95.43	0
c10130_g1_i1	c10130_g1_i1|m.6760	2.03	gi|91090452|ref|XP_967359.1|PREDICTED: ABC transporter G family member 20 [Tribolium castaneum]	57.25	2e-85
c10132_g1_i1	c10132_g1_i1|m.6763	27.2	gi|91089873|ref|XP_971596.1|PREDICTED: ruvB-like helicase 1 [Tribolium castaneum]	90.79	0
c10135_g1_i1	c10135_g1_i1|m.6766	14.18	gi|910319820|ref|XP_013162783.1|PREDICTED: stomatin-like protein 2, mitochondrial [Papilio xuthus]	70.16	0
c10136_g1_i1	c10136_g1_i1|m.6767	8.95	gi|642936592|ref|XP_008198498.1|PREDICTED: solute carrier family 2, facilitated glucose transporter member 1-like isoform X1 [Tribolium castaneum]	55.56	0
c10136_g1_i2	c10136_g1_i2|m.6768	11.18	gi|642936594|ref|XP_008198499.1|PREDICTED: solute carrier family 2, facilitated glucose transporter member 1-like isoform X2 [Tribolium castaneum]	56.83	0
c10137_g1_i2	c10137_g1_i2|m.6769	3.87	gi|270007986|gb|EFA04434.1|hypothetical protein TcasGA2_TC014735 [Tribolium castaneum]	66.36	3e-43
c10137_g1_i3	c10137_g1_i3|m.6770	5	gi|642924747|ref|XP_008194424.1|PREDICTED: tyrosine-protein kinase PR2 isoform X3 [Tribolium castaneum]	71.29	0
c10138_g1_i1	c10138_g1_i1|m.6771	2.88	gi|642921119|ref|XP_975344.2|PREDICTED: sphingomyelin phosphodiesterase-like [Tribolium castaneum]	50.57	0
c10139_g1_i1	c10139_g1_i1|m.6772	1.23	gi|642910457|ref|XP_008190746.1|PREDICTED: fibroblast growth factor receptor homolog 1-like isoform X1 [Tribolium castaneum]	74.49	0
c10139_g1_i2	c10139_g1_i2|m.6773	1.61	gi|642910461|ref|XP_008190748.1|PREDICTED: fibroblast growth factor receptor homolog 1-like isoform X2 [Tribolium castaneum]	73.38	0
c10142_g1_i1	c10142_g1_i1|m.6780	1.48	gi|642928639|ref|XP_008199716.1|PREDICTED: cyclin-dependent kinase 5 [Tribolium castaneum]	96.98	0
c10142_g1_i2	c10142_g1_i2|m.6781	1.19	gi|642928639|ref|XP_008199716.1|PREDICTED: cyclin-dependent kinase 5 [Tribolium castaneum]	98.49	1e-140
c10143_g1_i1	c10143_g1_i1|m.6782	9.37	gi|642919843|ref|XP_008192092.1|PREDICTED: TIP41-like protein [Tribolium castaneum]	61.54	5e-129
c10146_g1_i1	c10146_g1_i1|m.6783	1.1	gi|91090940|ref|XP_974469.1|PREDICTED: titin [Tribolium castaneum]	55.97	9e-43
c10147_g1_i1	c10147_g1_i1|m.6785	98.9	gi|63145975|gb|AAO17923.2|AF467104_1alpha-amylase [Megaselia scalaris]	63.65	0
c10147_g2_i1	c10147_g2_i1|m.6786	6.66	gi|139478961|gb|ABO77639.1|alpha-amylase [Musca domestica]	54.33	3e-72
c10147_g4_i1	c10147_g4_i1|m.6787	7.84	gi|27525630|gb|AAO17922.1|AF467103_1alpha-amylase [Osmia cornuta]	63.8	3e-73
c10148_g1_i1	c10148_g1_i1|m.6788	6	gi|189237630|ref|XP_970913.2|PREDICTED: intersectin-1 [Tribolium castaneum]	82.95	0
c10149_g1_i1	c10149_g1_i1|m.6789	2240.87	gi|91081061|ref|XP_975415.1|PREDICTED: 40S ribosomal protein S2 [Tribolium castaneum]	96.17	9e-163
c10150_g1_i1	c10150_g1_i1|m.6790	278.17	gi|270009467|gb|EFA05915.1|hypothetical protein TcasGA2_TC008731 [Tribolium castaneum]	54.14	6e-104
c10152_g1_i1	c10152_g1_i1|m.6791	9.7	gi|91087535|ref|XP_970133.1|PREDICTED: DNA-directed RNA polymerases I, II, and III subunit RPABC3 [Tribolium castaneum]	93.81	6e-59
c10152_g1_i2	c10152_g1_i2|m.6792	5.8	gi|91087535|ref|XP_970133.1|PREDICTED: DNA-directed RNA polymerases I, II, and III subunit RPABC3 [Tribolium castaneum]	93.86	1e-72
c10152_g1_i4	c10152_g1_i4|m.6793	11.93	gi|91087535|ref|XP_970133.1|PREDICTED: DNA-directed RNA polymerases I, II, and III subunit RPABC3 [Tribolium castaneum]	95.33	4e-101
c10156_g1_i1	c10156_g1_i1|m.6798	55.04	gi|301068495|gb|ADK55065.1|luciferin regenerating enzyme [Lampyris turkestanicus]	78.18	0
c10157_g1_i1	c10157_g1_i1|m.6799	21.07	gi|332376103|gb|AEE63192.1|unknown [Dendroctonus ponderosae]	82.26	2e-161
c1016_g1_i1	c1016_g1_i1|m.282	22.49	gi|91092410|ref|XP_967365.1|PREDICTED: zinc finger HIT domain-containing protein 1 [Tribolium castaneum]	66.88	1e-75
c10160_g1_i1	c10160_g1_i1|m.6801	19.11	gi|91087153|ref|XP_975332.1|PREDICTED: 28S ribosomal protein S11, mitochondrial [Tribolium castaneum]	75.6	9e-90
c10162_g1_i2	c10162_g1_i2|m.6807	3.61	gi|746864062|ref|XP_011063011.1|PREDICTED: syntaxin-17 [Acromyrmex echinatior]	51.58	3e-23
c10163_g1_i2	c10163_g1_i2|m.6808	3.81	gi|189242304|ref|XP_001808377.1|PREDICTED: uncharacterized protein LOC100141613 [Tribolium castaneum]	66.08	3e-63
c10163_g1_i3	c10163_g1_i3|m.6809	2.39	gi|478253880|gb|ENN74172.1|hypothetical protein YQE_09145, partial [Dendroctonus ponderosae]	52.1	2e-35
c10165_g1_i1	c10165_g1_i1|m.6811	27.64	gi|189237189|ref|XP_001809029.1|PREDICTED: UPF0184 protein AAEL002161 [Tribolium castaneum]	53.85	5e-08
c10167_g1_i1	c10167_g1_i1|m.6814	3.32	gi|642935202|ref|XP_008199688.1|PREDICTED: kelch-like ECH-associated protein 1 isoform X2 [Tribolium castaneum]	88.09	0
c10167_g1_i1	c10167_g1_i1|m.6815	3.32	gi|642935202|ref|XP_008199688.1|PREDICTED: kelch-like ECH-associated protein 1 isoform X2 [Tribolium castaneum]	80	1e-119
c10167_g1_i3	c10167_g1_i3|m.6816	3.73	gi|642935202|ref|XP_008199688.1|PREDICTED: kelch-like ECH-associated protein 1 isoform X2 [Tribolium castaneum]	84.85	0
c10167_g1_i4	c10167_g1_i4|m.6817	3.29	gi|642935202|ref|XP_008199688.1|PREDICTED: kelch-like ECH-associated protein 1 isoform X2 [Tribolium castaneum]	84.85	0
c10171_g1_i1	c10171_g1_i1|m.6820	12.1	gi|282848153|ref|NP_001164295.1|kayak isoform D [Tribolium castaneum]	66.12	6e-81
c10171_g1_i2	c10171_g1_i2|m.6821	14.61	gi|282848147|ref|NP_001164292.1|kayak isoform A [Tribolium castaneum]	67.63	5e-134
c10171_g1_i3	c10171_g1_i3|m.6822	11.54	gi|282848151|ref|NP_001164294.1|kayak isoform C [Tribolium castaneum]	66.41	7e-135
c10173_g1_i2	c10173_g1_i2|m.6825	2.22	gi|668462438|gb|KFB49907.1|hypothetical protein ZHAS_00017938 [Anopheles sinensis]	51.56	7e-09
c10174_g1_i1	c10174_g1_i1|m.6827	3.43	gi|642934883|ref|XP_008197847.1|PREDICTED: DDB1- and CUL4-associated factor 7 isoform X2 [Tribolium castaneum]	95.4	0
c10176_g1_i1	c10176_g1_i1|m.6829	20.94	gi|91088067|ref|XP_967758.1|PREDICTED: UPF0047 protein C4A8.02c [Tribolium castaneum]	98.82	9e-121
c10177_g1_i1	c10177_g1_i1|m.6830	9.73	gi|91089675|ref|XP_974428.1|PREDICTED: probable trans-2-enoyl-CoA reductase, mitochondrial [Tribolium castaneum]	59.6	4e-157
c10178_g1_i1	c10178_g1_i1|m.6831	44.85	gi|817084680|ref|XP_012264997.1|PREDICTED: 2-oxo-4-hydroxy-4-carboxy-5-ureidoimidazoline decarboxylase-like [Athalia rosae]	51.5	2e-47
c10180_g1_i1	c10180_g1_i1|m.6832	16.25	gi|332374148|gb|AEE62215.1|unknown [Dendroctonus ponderosae]	60.47	2e-132
c10181_g1_i1	c10181_g1_i1|m.6833	55.03	gi|91092520|ref|XP_971182.1|PREDICTED: endoplasmic reticulum resident protein 44 [Tribolium castaneum]	74.85	0
c10183_g1_i1	c10183_g1_i1|m.6835	4.88	gi|642914834|ref|XP_008194983.1|PREDICTED: inhibitor of growth protein 3 isoform X1 [Tribolium castaneum]	75.19	0
c10184_g1_i1	c10184_g1_i1|m.6837	8.55	gi|478252383|gb|ENN72809.1|hypothetical protein YQE_10613, partial [Dendroctonus ponderosae]	58.67	3e-52
c10185_g1_i1	c10185_g1_i1|m.6839	1.51	gi|478255545|gb|ENN75762.1|hypothetical protein YQE_07721, partial [Dendroctonus ponderosae]	62.09	0
c10186_g1_i1	c10186_g1_i1|m.6840	2.88	gi|189242051|ref|XP_968641.2|PREDICTED: DNA replication licensing factor Mcm3 [Tribolium castaneum]	73.51	0
c10187_g1_i1	c10187_g1_i1|m.6841	5.49	gi|755926852|ref|XP_011302341.1|PREDICTED: autophagy-related protein 16-1 isoform X1 [Fopius arisanus]	67.26	0
c10187_g1_i2	c10187_g1_i2|m.6842	4.19	gi|270003443|gb|EEZ99890.1|hypothetical protein TcasGA2_TC002674 [Tribolium castaneum]	64.25	2e-87
c10188_g1_i1	c10188_g1_i1|m.6843	3.04	gi|189240214|ref|XP_001807190.1|PREDICTED: uncharacterized protein LOC100142448 isoform X2 [Tribolium castaneum]	65.12	4e-121
c10189_g1_i1	c10189_g1_i1|m.6844	2.22	gi|91077082|ref|XP_969760.1|PREDICTED: protein NRDE2 homolog [Tribolium castaneum]	59.45	0
c10190_g1_i1	c10190_g1_i1|m.6845	6.68	gi|91093699|ref|XP_966579.1|PREDICTED: probable G-protein coupled receptor Mth-like 1 [Tribolium castaneum]	60.69	0
c10191_g1_i1	c10191_g1_i1|m.6846	38.21	gi|642911373|ref|XP_008199397.1|PREDICTED: syndecan [Tribolium castaneum]	55.98	8e-59
c10193_g1_i2	c10193_g1_i2|m.6849	1.36	gi|699678843|ref|XP_009886383.1|PREDICTED: folylpolyglutamate synthase, mitochondrial [Charadrius vociferus]	55.33	7e-54
c10195_g2_i1	c10195_g2_i1|m.6851	4.68	gi|642912719|ref|XP_008200974.1|PREDICTED: tyrosine kinase receptor Cad96Ca isoform X1 [Tribolium castaneum]	65.54	0
c10196_g1_i2	c10196_g1_i2|m.6852	7.45	gi|642920751|ref|XP_008192546.1|PREDICTED: pre-mRNA cleavage complex 2 protein Pcf11 [Tribolium castaneum]	59.2	3e-101
c10198_g1_i1	c10198_g1_i1|m.6854	46.05	gi|332374922|gb|AEE62602.1|unknown [Dendroctonus ponderosae]	51.17	7e-117
c102_g2_i1	c102_g2_i1|m.31	0.92	gi|270015132|gb|EFA11580.1|trithorax [Tribolium castaneum]	52.1	2e-22
c10200_g1_i1	c10200_g1_i1|m.6855	7.65	gi|91080735|ref|XP_975438.1|PREDICTED: RING finger protein 121 [Tribolium castaneum]	80.76	0
c10201_g1_i1	c10201_g1_i1|m.6856	9.53	gi|91078172|ref|XP_967060.1|PREDICTED: sorting nexin-27 [Tribolium castaneum]	86.05	0
c10202_g1_i1	c10202_g1_i1|m.6858	9.76	gi|91082767|ref|XP_973630.1|PREDICTED: MAP kinase-activated protein kinase 2 [Tribolium castaneum]	86.09	0
c10203_g1_i1	c10203_g1_i1|m.6859	61.92	gi|91090924|ref|XP_974164.1|PREDICTED: annexin B9 [Tribolium castaneum]	70.61	2e-155
c10205_g1_i1	c10205_g1_i1|m.6862	14.89	gi|189234542|ref|XP_973179.2|PREDICTED: ubiquitin-like protein 7 [Tribolium castaneum]	57.43	3e-117
c10206_g1_i1	c10206_g1_i1|m.6863	1.85	gi|642910907|ref|XP_008193460.1|PREDICTED: katanin p60 ATPase-containing subunit A-like 1 [Tribolium castaneum]	73.13	8e-161
c10206_g1_i1	c10206_g1_i1|m.6864	1.85	gi|642910907|ref|XP_008193460.1|PREDICTED: katanin p60 ATPase-containing subunit A-like 1 [Tribolium castaneum]	92.81	4e-93
c10206_g1_i2	c10206_g1_i2|m.6865	2.45	gi|642910907|ref|XP_008193460.1|PREDICTED: katanin p60 ATPase-containing subunit A-like 1 [Tribolium castaneum]	81.14	0
c10207_g1_i1	c10207_g1_i1|m.6866	6.58	gi|642913326|ref|XP_008195269.1|PREDICTED: protein roadkill isoform X3 [Tribolium castaneum]	97.27	0
c10208_g1_i1	c10208_g1_i1|m.6867	4.25	gi|642913942|ref|XP_008201223.1|PREDICTED: phosphatidate phosphatase PPAPDC1A [Tribolium castaneum]	51.6	1e-80
c10209_g1_i1	c10209_g1_i1|m.6868	1.84	gi|189241493|ref|XP_967027.2|PREDICTED: ras GTPase-activating protein 1 [Tribolium castaneum]	88.71	0
c10209_g1_i2	c10209_g1_i2|m.6869	1.93	gi|189241493|ref|XP_967027.2|PREDICTED: ras GTPase-activating protein 1 [Tribolium castaneum]	88.71	0
c10210_g1_i1	c10210_g1_i1|m.6870	1.82	gi|478257312|gb|ENN77472.1|hypothetical protein YQE_06000, partial [Dendroctonus ponderosae]	54.72	5e-08
c10211_g1_i1	c10211_g1_i1|m.6871	9.07	gi|189241734|ref|XP_966970.2|PREDICTED: ubiquinol-cytochrome-c reductase complex assembly factor 1 [Tribolium castaneum]	52.45	7e-67
c10213_g1_i1	c10213_g1_i1|m.6873	3.73	gi|189237458|ref|XP_967667.2|PREDICTED: solute carrier family 35 member E2-like [Tribolium castaneum]	82.89	0
c10214_g1_i1	c10214_g1_i1|m.6874	3.87	gi|270005945|gb|EFA02393.1|hypothetical protein TcasGA2_TC008073 [Tribolium castaneum]	60.47	8e-161
c10214_g1_i2	c10214_g1_i2|m.6875	3.73	gi|270005945|gb|EFA02393.1|hypothetical protein TcasGA2_TC008073 [Tribolium castaneum]	60.47	1e-160
c10216_g1_i2	c10216_g1_i2|m.6876	7.76	gi|642938156|ref|XP_969509.2|PREDICTED: cleavage and polyadenylation specificity factor subunit 5 [Tribolium castaneum]	88.56	1e-124
c10216_g1_i3	c10216_g1_i3|m.6877	6.2	gi|642938156|ref|XP_969509.2|PREDICTED: cleavage and polyadenylation specificity factor subunit 5 [Tribolium castaneum]	90.61	8e-160
c10216_g1_i4	c10216_g1_i4|m.6878	7.22	gi|642938156|ref|XP_969509.2|PREDICTED: cleavage and polyadenylation specificity factor subunit 5 [Tribolium castaneum]	90.61	8e-160
c10217_g2_i1	c10217_g2_i1|m.6880	2.01	gi|91088681|ref|XP_974930.1|PREDICTED: synaptic vesicle membrane protein VAT-1 homolog [Tribolium castaneum]	52.51	3e-122
c10218_g1_i1	c10218_g1_i1|m.6881	632.75	gi|512918037|ref|XP_004929033.1|PREDICTED: phospholipase A2-like [Bombyx mori]	56.34	2e-51
c10220_g1_i1	c10220_g1_i1|m.6882	3.36	gi|642937299|ref|XP_008198776.1|PREDICTED: DNA excision repair protein ERCC-1 [Tribolium castaneum]	58.41	5e-38
c10220_g1_i2	c10220_g1_i2|m.6883	5.42	gi|642937299|ref|XP_008198776.1|PREDICTED: DNA excision repair protein ERCC-1 [Tribolium castaneum]	70.49	1e-123
c10221_g2_i1	c10221_g2_i1|m.6884	2.19	gi|642920773|ref|XP_008192554.1|PREDICTED: LOW QUALITY PROTEIN: spondin-1 [Tribolium castaneum]	66.32	4e-162
c10222_g1_i1	c10222_g1_i1|m.6885	36.2	gi|91089541|ref|XP_971419.1|PREDICTED: protein canopy 4 [Tribolium castaneum]	74.64	8e-98
c10223_g1_i1	c10223_g1_i1|m.6886	12.87	gi|91092260|ref|XP_967199.1|PREDICTED: uncharacterized protein C6orf136 [Tribolium castaneum]	62.69	8e-89
c10225_g1_i1	c10225_g1_i1|m.6888	39.34	gi|91085815|ref|XP_974770.1|PREDICTED: maternal protein exuperantia-1 [Tribolium castaneum]	64.23	0
c10225_g1_i2	c10225_g1_i2|m.6889	38.74	gi|91085815|ref|XP_974770.1|PREDICTED: maternal protein exuperantia-1 [Tribolium castaneum]	64.23	0
c10226_g1_i1	c10226_g1_i1|m.6890	5.38	gi|332374108|gb|AEE62195.1|unknown [Dendroctonus ponderosae]	59.63	8e-123
c10227_g1_i1	c10227_g1_i1|m.6891	47.18	gi|91087995|ref|XP_973673.1|PREDICTED: protein transport protein Sec31A [Tribolium castaneum]	61.96	0
c10228_g1_i1	c10228_g1_i1|m.6892	37.75	gi|91089527|ref|XP_971048.1|PREDICTED: protein penguin [Tribolium castaneum]	53.15	0
c10229_g1_i1	c10229_g1_i1|m.6894	40.84	gi|91094943|ref|XP_967788.1|PREDICTED: 26S protease regulatory subunit 10B [Tribolium castaneum]	96.94	0
c1023_g1_i1	c1023_g1_i1|m.283	1.05	gi|642916264|ref|XP_008190954.1|PREDICTED: titin [Tribolium castaneum]	56.29	3e-44
c10230_g1_i1	c10230_g1_i1|m.6895	36.76	gi|157128340|ref|XP_001661409.1|AAEL011101-PA [Aedes aegypti]	85.71	6e-38
c10232_g1_i1	c10232_g1_i1|m.6897	7.64	gi|642936899|ref|XP_008194415.1|PREDICTED: tropomodulin isoform X6 [Tribolium castaneum]	84.39	0
c10232_g1_i2	c10232_g1_i2|m.6898	8.04	gi|189241537|ref|XP_970292.2|PREDICTED: tropomodulin isoform X2 [Tribolium castaneum]	82.81	0
c10232_g1_i3	c10232_g1_i3|m.6899	8.01	gi|642936899|ref|XP_008194415.1|PREDICTED: tropomodulin isoform X6 [Tribolium castaneum]	84.39	0
c10232_g1_i4	c10232_g1_i4|m.6900	8.54	gi|642936893|ref|XP_008194396.1|PREDICTED: tropomodulin isoform X3 [Tribolium castaneum]	84.79	0
c10234_g3_i1	c10234_g3_i1|m.6903	1.49	gi|642921594|ref|XP_008192439.1|PREDICTED: protein xmas-2 [Tribolium castaneum]	57.41	3e-96
c10234_g4_i1	c10234_g4_i1|m.6904	1.57	gi|642921594|ref|XP_008192439.1|PREDICTED: protein xmas-2 [Tribolium castaneum]	50.4	2e-104
c10235_g1_i1	c10235_g1_i1|m.6908	3.27	gi|91092584|ref|XP_969806.1|PREDICTED: F-box only protein 42 [Tribolium castaneum]	56.33	0
c10236_g1_i1	c10236_g1_i1|m.6909	2.1	gi|197276682|ref|NP_001127850.1|smoothened precursor [Tribolium castaneum]	61.71	0
c10236_g1_i1	c10236_g1_i1|m.6910	2.1	gi|197276682|ref|NP_001127850.1|smoothened precursor [Tribolium castaneum]	57.05	9e-115
c10237_g1_i1	c10237_g1_i1|m.6911	4.39	gi|91088253|ref|XP_966567.1|PREDICTED: ankyrin repeat and zinc finger domain-containing protein 1 [Tribolium castaneum]	50.62	0
c10237_g1_i3	c10237_g1_i3|m.6912	3.09	gi|815922428|ref|XP_012246036.1|PREDICTED: ankyrin repeat and zinc finger domain-containing protein 1-like isoform X2 [Bombus impatiens]	56.2	4e-34
c10238_g1_i1	c10238_g1_i1|m.6913	2.41	gi|91093829|ref|XP_969227.1|PREDICTED: transmembrane protein 161B [Tribolium castaneum]	67.33	0
c10238_g1_i2	c10238_g1_i2|m.6914	2.93	gi|91093829|ref|XP_969227.1|PREDICTED: transmembrane protein 161B [Tribolium castaneum]	67.21	0
c1024_g1_i1	c1024_g1_i1|m.284	4.97	gi|167466209|ref|NP_001034503.2|fork head [Tribolium castaneum]	76.43	0
c10240_g1_i3	c10240_g1_i3|m.6916	4.52	gi|478258085|gb|ENN78223.1|hypothetical protein YQE_05375, partial [Dendroctonus ponderosae]	72.73	2e-89
c10241_g1_i1	c10241_g1_i1|m.6917	2	gi|91079326|ref|XP_968197.1|PREDICTED: folliculin [Tribolium castaneum]	57.03	6e-153
c10241_g1_i2	c10241_g1_i2|m.6918	2.01	gi|91079326|ref|XP_968197.1|PREDICTED: folliculin [Tribolium castaneum]	57.03	6e-153
c10242_g1_i1	c10242_g1_i1|m.6919	3.78	gi|642939138|ref|XP_008201186.1|PREDICTED: SEC14-like protein 3, partial [Tribolium castaneum]	57.69	2e-172
c10243_g1_i1	c10243_g1_i1|m.6920	71.79	gi|642923787|ref|XP_008193883.1|PREDICTED: uncharacterized protein F13E6.1 [Tribolium castaneum]	80	3e-97
c10244_g1_i1	c10244_g1_i1|m.6921	2.78	gi|749386509|gb|AJF15706.1|argonaute-3 [Agrilus planipennis]	60.19	0
c10244_g1_i2	c10244_g1_i2|m.6922	2.59	gi|749386509|gb|AJF15706.1|argonaute-3 [Agrilus planipennis]	60.19	0
c10245_g1_i1	c10245_g1_i1|m.6923	91.99	gi|478256395|gb|ENN76585.1|hypothetical protein YQE_07034, partial [Dendroctonus ponderosae]	56.18	6e-97
c10246_g1_i1	c10246_g1_i1|m.6924	6.6	gi|642926949|ref|XP_008195073.1|PREDICTED: ion transport peptide isoform X3 [Tribolium castaneum]	63.56	2e-50
c10246_g1_i3	c10246_g1_i3|m.6925	1.77	gi|642926949|ref|XP_008195073.1|PREDICTED: ion transport peptide isoform X3 [Tribolium castaneum]	63.56	2e-50
c10246_g1_i4	c10246_g1_i4|m.6926	11.67	gi|642926935|ref|XP_008195066.1|PREDICTED: ion transport peptide isoform X2 [Tribolium castaneum]	56.45	4e-43
c10247_g1_i2	c10247_g1_i2|m.6929	74.35	gi|546685863|gb|ERL95295.1|hypothetical protein D910_12561 [Dendroctonus ponderosae]	50	5e-26
c10249_g1_i1	c10249_g1_i1|m.6933	1.22	gi|158284636|ref|XP_307609.3|Anopheles gambiae str. PEST AGAP012697-PA [Anopheles gambiae str. PEST]	51.22	9e-18
c10249_g1_i2	c10249_g1_i2|m.6935	1.3	gi|158284636|ref|XP_307609.3|Anopheles gambiae str. PEST AGAP012697-PA [Anopheles gambiae str. PEST]	51.22	9e-18
c10252_g1_i1	c10252_g1_i1|m.6940	2.15	gi|91078180|ref|XP_967491.1|PREDICTED: beta-galactosidase-1-like protein 2 [Tribolium castaneum]	61.49	0
c10254_g1_i1	c10254_g1_i1|m.6942	15.35	gi|91085523|ref|XP_972076.1|PREDICTED: sphingolipid delta(4)-desaturase DES1 [Tribolium castaneum]	82.93	4e-125
c10254_g1_i1	c10254_g1_i1|m.6943	15.35	gi|805804664|ref|XP_012145561.1|PREDICTED: sphingolipid delta(4)-desaturase/C4-hydroxylase DES2 isoform X2 [Megachile rotundata]	89.32	6e-63
c10254_g1_i2	c10254_g1_i2|m.6944	19.6	gi|91085523|ref|XP_972076.1|PREDICTED: sphingolipid delta(4)-desaturase DES1 [Tribolium castaneum]	85	0
c10254_g1_i3	c10254_g1_i3|m.6945	15.18	gi|91085523|ref|XP_972076.1|PREDICTED: sphingolipid delta(4)-desaturase DES1 [Tribolium castaneum]	80.95	0
c10255_g1_i1	c10255_g1_i1|m.6946	1.77	gi|642936074|ref|XP_008198292.1|PREDICTED: telomerase-binding protein EST1A [Tribolium castaneum]	54.34	0
c10255_g1_i2	c10255_g1_i2|m.6948	2.07	gi|642936074|ref|XP_008198292.1|PREDICTED: telomerase-binding protein EST1A [Tribolium castaneum]	54.34	0
c10257_g1_i1	c10257_g1_i1|m.6951	3.9	gi|642927268|ref|XP_008195200.1|PREDICTED: poly(A) RNA polymerase, mitochondrial [Tribolium castaneum]	57.21	1e-73
c10257_g1_i2	c10257_g1_i2|m.6952	5.63	gi|642927268|ref|XP_008195200.1|PREDICTED: poly(A) RNA polymerase, mitochondrial [Tribolium castaneum]	57.72	0
c10258_g1_i1	c10258_g1_i1|m.6953	4.52	gi|91094273|ref|XP_970483.1|PREDICTED: ethylmalonyl-CoA decarboxylase [Tribolium castaneum]	50.45	5e-79
c10259_g1_i1	c10259_g1_i1|m.6955	118.95	gi|478251511|gb|ENN71974.1|hypothetical protein YQE_11407, partial [Dendroctonus ponderosae]	65.61	4e-104
c10259_g1_i1	c10259_g1_i1|m.6956	118.95	gi|156541992|ref|XP_001599992.1|PREDICTED: 10 kDa heat shock protein, mitochondrial [Nasonia vitripennis]	78.64	4e-53
c10260_g1_i1	c10260_g1_i1|m.6957	1.12	gi|755968991|ref|XP_011306337.1|PREDICTED: ovarian-specific serine/threonine-protein kinase Lok isoform X2 [Fopius arisanus]	50	2e-21
c10262_g1_i1	c10262_g1_i1|m.6962	2.05	gi|642938597|ref|XP_008199858.1|PREDICTED: C2 domain-containing protein 5 isoform X2 [Tribolium castaneum]	59.03	3e-145
c10265_g1_i1	c10265_g1_i1|m.6964	2.71	gi|307169903|gb|EFN62412.1|Tumor protein p63-regulated gene 1-like protein [Camponotus floridanus]	50	4e-20
c10265_g1_i2	c10265_g1_i2|m.6965	1.48	gi|751214998|ref|XP_011160385.1|PREDICTED: tumor protein p63-regulated gene 1-like protein isoform X2 [Solenopsis invicta]	50.82	3e-56
c10265_g1_i4	c10265_g1_i4|m.6968	1.98	gi|646704067|gb|KDR12422.1|Tumor protein p63-regulated gene 1-like protein [Zootermopsis nevadensis]	50.88	3e-30
c10265_g1_i4	c10265_g1_i4|m.6969	1.98	gi|307169903|gb|EFN62412.1|Tumor protein p63-regulated gene 1-like protein [Camponotus floridanus]	50	4e-20
c10265_g1_i5	c10265_g1_i5|m.6970	1.38	gi|646704067|gb|KDR12422.1|Tumor protein p63-regulated gene 1-like protein [Zootermopsis nevadensis]	50.88	3e-30
c10266_g1_i1	c10266_g1_i1|m.6971	26.21	gi|642914541|ref|XP_008201720.1|PREDICTED: organic cation transporter protein [Tribolium castaneum]	61.37	0
c10267_g1_i1	c10267_g1_i1|m.6972	5.53	gi|91085713|ref|XP_972970.1|PREDICTED: cyclin-H [Tribolium castaneum]	79.57	0
c10268_g1_i1	c10268_g1_i1|m.6973	4.26	gi|270006525|gb|EFA02973.1|hypothetical protein TcasGA2_TC030714, partial [Tribolium castaneum]	50.52	7e-39
c10268_g1_i1	c10268_g1_i1|m.6974	4.26	gi|642918744|ref|XP_008191566.1|PREDICTED: zinc finger matrin-type protein CG9776-like isoform X1 [Tribolium castaneum]	50	5e-31
c10268_g1_i2	c10268_g1_i2|m.6975	4.23	gi|642918746|ref|XP_008191567.1|PREDICTED: zinc finger matrin-type protein CG9776-like isoform X2 [Tribolium castaneum]	52.66	4e-152
c10268_g1_i2	c10268_g1_i2|m.6976	4.23	gi|642918744|ref|XP_008191566.1|PREDICTED: zinc finger matrin-type protein CG9776-like isoform X1 [Tribolium castaneum]	50	5e-31
c10268_g1_i3	c10268_g1_i3|m.6977	3.66	gi|642918746|ref|XP_008191567.1|PREDICTED: zinc finger matrin-type protein CG9776-like isoform X2 [Tribolium castaneum]	52.66	4e-152
c10268_g1_i3	c10268_g1_i3|m.6978	3.66	gi|642918744|ref|XP_008191566.1|PREDICTED: zinc finger matrin-type protein CG9776-like isoform X1 [Tribolium castaneum]	50	7e-31
c10268_g1_i4	c10268_g1_i4|m.6979	4.72	gi|270006525|gb|EFA02973.1|hypothetical protein TcasGA2_TC030714, partial [Tribolium castaneum]	50.52	7e-39
c10268_g1_i4	c10268_g1_i4|m.6980	4.72	gi|642918746|ref|XP_008191567.1|PREDICTED: zinc finger matrin-type protein CG9776-like isoform X2 [Tribolium castaneum]	54.11	2e-84
c10268_g1_i5	c10268_g1_i5|m.6981	4.57	gi|270006525|gb|EFA02973.1|hypothetical protein TcasGA2_TC030714, partial [Tribolium castaneum]	50.52	7e-39
c10268_g1_i5	c10268_g1_i5|m.6982	4.57	gi|642918744|ref|XP_008191566.1|PREDICTED: zinc finger matrin-type protein CG9776-like isoform X1 [Tribolium castaneum]	53.54	1e-46
c10268_g1_i6	c10268_g1_i6|m.6983	3.46	gi|642918746|ref|XP_008191567.1|PREDICTED: zinc finger matrin-type protein CG9776-like isoform X2 [Tribolium castaneum]	52.66	4e-152
c10268_g1_i6	c10268_g1_i6|m.6984	3.46	gi|642918744|ref|XP_008191566.1|PREDICTED: zinc finger matrin-type protein CG9776-like isoform X1 [Tribolium castaneum]	50	5e-31
c10268_g1_i7	c10268_g1_i7|m.6985	4.35	gi|642918746|ref|XP_008191567.1|PREDICTED: zinc finger matrin-type protein CG9776-like isoform X2 [Tribolium castaneum]	52.34	0
c10270_g1_i1	c10270_g1_i1|m.6986	7.67	gi|801377123|ref|XP_012064429.1|PREDICTED: frataxin homolog, mitochondrial [Atta cephalotes]	62.86	1e-52
c10271_g1_i1	c10271_g1_i1|m.6987	7.96	gi|91091602|ref|XP_975764.1|PREDICTED: cytoplasmic dynein 1 intermediate chain isoform X7 [Tribolium castaneum]	87.21	0
c10271_g1_i3	c10271_g1_i3|m.6988	8.31	gi|642937050|ref|XP_008198669.1|PREDICTED: cytoplasmic dynein 1 intermediate chain isoform X10 [Tribolium castaneum]	87.24	0
c10271_g1_i4	c10271_g1_i4|m.6989	2.56	gi|642937039|ref|XP_008198663.1|PREDICTED: cytoplasmic dynein 1 intermediate chain isoform X4 [Tribolium castaneum]	84.94	1e-76
c10271_g1_i5	c10271_g1_i5|m.6990	2.15	gi|642937043|ref|XP_008198665.1|PREDICTED: cytoplasmic dynein 1 intermediate chain isoform X6 [Tribolium castaneum]	84.28	1e-70
c10275_g1_i1	c10275_g1_i1|m.6993	12.09	gi|642921796|ref|XP_008199323.1|PREDICTED: transcription initiation factor IIB [Tribolium castaneum]	95.87	0
c10276_g1_i1	c10276_g1_i1|m.6994	23.85	gi|91083639|ref|XP_970664.1|PREDICTED: synaptobrevin homolog YKT6 [Tribolium castaneum]	79.9	4e-118
c10278_g1_i1	c10278_g1_i1|m.7001	3.88	gi|91083931|ref|XP_974830.1|PREDICTED: N-acetylserotonin O-methyltransferase-like protein [Tribolium castaneum]	69.61	1e-95
c10283_g1_i1	c10283_g1_i1|m.7009	10.91	gi|270005401|gb|EFA01849.1|hypothetical protein TcasGA2_TC007452 [Tribolium castaneum]	82.19	0
c10283_g1_i2	c10283_g1_i2|m.7010	9.9	gi|270005401|gb|EFA01849.1|hypothetical protein TcasGA2_TC007452 [Tribolium castaneum]	83.8	0
c10284_g1_i1	c10284_g1_i1|m.7011	16.32	gi|270006638|gb|EFA03086.1|hypothetical protein TcasGA2_TC012992 [Tribolium castaneum]	81.51	0
c10285_g1_i1	c10285_g1_i1|m.7015	4.31	gi|91094429|ref|XP_969518.1|PREDICTED: M-phase inducer phosphatase [Tribolium castaneum]	55.51	5e-141
c10287_g1_i1	c10287_g1_i1|m.7017	8.22	gi|91076154|ref|XP_970766.1|PREDICTED: venom protease [Tribolium castaneum]	51.34	4e-86
c10287_g1_i2	c10287_g1_i2|m.7018	11.04	gi|91076154|ref|XP_970766.1|PREDICTED: venom protease [Tribolium castaneum]	53.41	4e-137
c10289_g1_i1	c10289_g1_i1|m.7019	5.44	gi|189240413|ref|XP_969795.2|PREDICTED: forkhead box protein K1 [Tribolium castaneum]	78.57	0
c1029_g1_i1	c1029_g1_i1|m.285	8.61	gi|332373660|gb|AEE61971.1|unknown [Dendroctonus ponderosae]	57.08	2e-84
c10291_g1_i1	c10291_g1_i1|m.7020	22.61	gi|91082329|ref|XP_974627.1|PREDICTED: mannose-P-dolichol utilization defect 1 protein homolog [Tribolium castaneum]	65.25	2e-100
c10292_g1_i1	c10292_g1_i1|m.7021	0.67	gi|156618|gb|AAA28265.1|mariner transposase [Chrysoperla plorabunda]	68.64	2e-78
c10293_g1_i1	c10293_g1_i1|m.7023	6.47	gi|642934812|ref|XP_008197820.1|PREDICTED: protein phosphatase 1 regulatory subunit 14B [Tribolium castaneum]	80.54	2e-73
c10293_g1_i2	c10293_g1_i2|m.7024	4.33	gi|642934812|ref|XP_008197820.1|PREDICTED: protein phosphatase 1 regulatory subunit 14B [Tribolium castaneum]	80.54	2e-73
c10293_g1_i3	c10293_g1_i3|m.7025	4.96	gi|642934812|ref|XP_008197820.1|PREDICTED: protein phosphatase 1 regulatory subunit 14B [Tribolium castaneum]	80.54	2e-73
c10294_g1_i1	c10294_g1_i1|m.7026	2.12	gi|270014024|gb|EFA10472.1|hypothetical protein TcasGA2_TC012718 [Tribolium castaneum]	57.89	7e-77
c10294_g1_i3	c10294_g1_i3|m.7027	3.79	gi|270014024|gb|EFA10472.1|hypothetical protein TcasGA2_TC012718 [Tribolium castaneum]	57.14	7e-96
c10297_g1_i1	c10297_g1_i1|m.7029	10.78	gi|642934648|ref|XP_972393.2|PREDICTED: kelch-like protein 26 isoform X1 [Tribolium castaneum]	58.17	0
c10299_g1_i1	c10299_g1_i1|m.7031	15.74	gi|91091456|ref|XP_972862.1|PREDICTED: aquaporin AQPcic [Tribolium castaneum]	64.32	4e-109
c10299_g1_i2	c10299_g1_i2|m.7032	12.94	gi|91091456|ref|XP_972862.1|PREDICTED: aquaporin AQPcic [Tribolium castaneum]	64.32	6e-109
c1030_g1_i1	c1030_g1_i1|m.286	1.05	gi|642918401|ref|XP_008200168.1|PREDICTED: zinc finger protein 239-like [Tribolium castaneum]	56.11	7e-128
c10300_g1_i1	c10300_g1_i1|m.7033	27.28	gi|665787812|ref|XP_008559327.1|PREDICTED: E3 ubiquitin-protein ligase RNF185-like [Microplitis demolitor]	77.65	4e-97
c10300_g1_i2	c10300_g1_i2|m.7034	21.25	gi|665787812|ref|XP_008559327.1|PREDICTED: E3 ubiquitin-protein ligase RNF185-like [Microplitis demolitor]	77.65	4e-97
c10302_g1_i1	c10302_g1_i1|m.7035	5.67	gi|642918274|ref|XP_008191440.1|PREDICTED: purine nucleoside phosphorylase isoform X1 [Tribolium castaneum]	71.92	4e-163
c10302_g1_i2	c10302_g1_i2|m.7036	4.83	gi|769837883|ref|XP_011630092.1|PREDICTED: purine nucleoside phosphorylase-like isoform X2 [Pogonomyrmex barbatus]	74.91	8e-161
c10304_g1_i2	c10304_g1_i2|m.7038	3.45	gi|195028993|ref|XP_001987359.1|GH21883 [Drosophila grimshawi]	50.5	3e-46
c10305_g1_i1	c10305_g1_i1|m.7039	1044.19	gi|288869508|ref|NP_001165861.1|ribosomal protein S6 [Tribolium castaneum]	87.3	5e-146
c10306_g1_i1	c10306_g1_i1|m.7040	6.81	gi|91080629|ref|XP_974349.1|PREDICTED: tetraspanin-9 [Tribolium castaneum]	72.31	6e-137
c10306_g1_i2	c10306_g1_i2|m.7041	6.36	gi|91080629|ref|XP_974349.1|PREDICTED: tetraspanin-9 [Tribolium castaneum]	72.31	6e-137
c10306_g1_i3	c10306_g1_i3|m.7042	6.66	gi|91080629|ref|XP_974349.1|PREDICTED: tetraspanin-9 [Tribolium castaneum]	72.31	6e-137
c10306_g1_i4	c10306_g1_i4|m.7044	8.44	gi|91080629|ref|XP_974349.1|PREDICTED: tetraspanin-9 [Tribolium castaneum]	72.31	6e-137
c10309_g1_i1	c10309_g1_i1|m.7048	43.02	gi|642921130|ref|XP_975383.3|PREDICTED: glutaredoxin-related protein 5, mitochondrial [Tribolium castaneum]	70.42	1e-68
c10310_g1_i1	c10310_g1_i1|m.7049	7.18	gi|498996152|ref|XP_004533288.1|PREDICTED: mitochondrial inner membrane protease ATP23 homolog [Ceratitis capitata]	68.48	3e-126
c10311_g1_i1	c10311_g1_i1|m.7050	6.06	gi|642927669|ref|XP_008195357.1|PREDICTED: high mobility group protein 20A [Tribolium castaneum]	71.01	3e-131
c10312_g1_i1	c10312_g1_i1|m.7051	617.96	gi|388504474|gb|AFK40303.1|unknown [Lotus japonicus]	96.15	2e-94
c10313_g1_i2	c10313_g1_i2|m.7053	1.1	gi|645003431|ref|XP_008212550.1|PREDICTED: protein bric-a-brac 2-like isoform X5 [Nasonia vitripennis]	54.68	2e-42
c10313_g1_i3	c10313_g1_i3|m.7054	1.09	gi|645003423|ref|XP_008212546.1|PREDICTED: protein tramtrack, beta isoform-like isoform X2 [Nasonia vitripennis]	54.68	2e-43
c10315_g1_i1	c10315_g1_i1|m.7056	4.79	gi|91088433|ref|XP_967839.1|PREDICTED: BTB/POZ domain-containing protein KCTD5 [Tribolium castaneum]	87.68	3e-137
c10316_g2_i1	c10316_g2_i1|m.7057	2.4	gi|642935177|ref|XP_967207.3|PREDICTED: elongation of very long chain fatty acids protein AAEL008004 isoform X2 [Tribolium castaneum]	70	4e-61
c10316_g2_i1	c10316_g2_i1|m.7058	2.4	gi|270014193|gb|EFA10641.1|hypothetical protein TcasGA2_TC016278 [Tribolium castaneum]	68.75	1e-55
c10317_g1_i1	c10317_g1_i1|m.7059	4.75	gi|242019987|ref|XP_002430439.1|Phosphatidylinositol-glycan biosynthesis class F protein, putative [Pediculus humanus corporis]	51.38	9e-28
c10319_g1_i1	c10319_g1_i1|m.7061	17.72	gi|91086841|ref|XP_974159.1|PREDICTED: glutamate--cysteine ligase regulatory subunit [Tribolium castaneum]	52.61	5e-89
c10321_g1_i1	c10321_g1_i1|m.7065	13.98	gi|642932406|ref|XP_008197097.1|PREDICTED: UPF0472 protein C16orf72 homolog isoform X3 [Tribolium castaneum]	70.64	2e-112
c10322_g1_i1	c10322_g1_i1|m.7066	2.29	gi|91077030|ref|XP_967400.1|PREDICTED: poly(ADP-ribose) glycohydrolase [Tribolium castaneum]	59.05	0
c10323_g1_i1	c10323_g1_i1|m.7067	1.56	gi|642928718|ref|XP_008199753.1|PREDICTED: fatty acid 2-hydroxylase isoform X1 [Tribolium castaneum]	62.89	7e-146
c10323_g1_i2	c10323_g1_i2|m.7068	1.1	gi|642928718|ref|XP_008199753.1|PREDICTED: fatty acid 2-hydroxylase isoform X1 [Tribolium castaneum]	62.89	7e-146
c10323_g1_i3	c10323_g1_i3|m.7069	1.5	gi|642928718|ref|XP_008199753.1|PREDICTED: fatty acid 2-hydroxylase isoform X1 [Tribolium castaneum]	62.89	7e-146
c10324_g1_i1	c10324_g1_i1|m.7070	10.88	gi|270008878|gb|EFA05326.1|hypothetical protein TcasGA2_TC015490 [Tribolium castaneum]	63.61	1e-130
c10326_g1_i1	c10326_g1_i1|m.7072	4.09	gi|546678068|gb|ERL88787.1|hypothetical protein D910_06169 [Dendroctonus ponderosae]	51.54	0
c10327_g1_i1	c10327_g1_i1|m.7073	6.04	gi|642911817|ref|XP_008200757.1|PREDICTED: histone-arginine methyltransferase CARMER isoform X1 [Tribolium castaneum]	81.32	0
c10327_g1_i2	c10327_g1_i2|m.7074	5.09	gi|642911817|ref|XP_008200757.1|PREDICTED: histone-arginine methyltransferase CARMER isoform X1 [Tribolium castaneum]	81.44	0
c10328_g1_i1	c10328_g1_i1|m.7075	1.95	gi|665792237|ref|XP_008543712.1|PREDICTED: excitatory amino acid transporter 1-like [Microplitis demolitor]	67.63	0
c10328_g1_i1	c10328_g1_i1|m.7076	1.95	gi|407009356|gb|EKE24509.1|hypothetical protein ACD_6C00102G0004 [uncultured bacterium]	50	3e-06
c10328_g1_i2	c10328_g1_i2|m.7077	0.87	gi|752883568|ref|XP_011259489.1|PREDICTED: excitatory amino acid transporter 1-like isoform X1 [Camponotus floridanus]	66.67	4e-64
c10329_g1_i1	c10329_g1_i1|m.7078	2.15	gi|189237968|ref|XP_001811946.1|PREDICTED: TBC1 domain family member 25 isoform X1 [Tribolium castaneum]	82.57	2e-56
c10329_g2_i1	c10329_g2_i1|m.7079	1.31	gi|189237968|ref|XP_001811946.1|PREDICTED: TBC1 domain family member 25 isoform X1 [Tribolium castaneum]	62.22	0
c10329_g2_i1	c10329_g2_i1|m.7080	1.31	gi|189237968|ref|XP_001811946.1|PREDICTED: TBC1 domain family member 25 isoform X1 [Tribolium castaneum]	81.22	2e-113
c10329_g2_i2	c10329_g2_i2|m.7081	1.18	gi|189237968|ref|XP_001811946.1|PREDICTED: TBC1 domain family member 25 isoform X1 [Tribolium castaneum]	67.01	0
c1033_g1_i1	c1033_g1_i1|m.287	2.34	gi|642911573|ref|XP_008200652.1|PREDICTED: receptor type guanylyl cyclase-like isoform X1 [Tribolium castaneum]	50	2e-09
c10331_g1_i1	c10331_g1_i1|m.7082	37.32	gi|91076006|ref|XP_966406.1|PREDICTED: very long-chain specific acyl-CoA dehydrogenase, mitochondrial [Tribolium castaneum]	65.65	6e-178
c10331_g1_i1	c10331_g1_i1|m.7083	37.32	gi|91076006|ref|XP_966406.1|PREDICTED: very long-chain specific acyl-CoA dehydrogenase, mitochondrial [Tribolium castaneum]	63.7	1e-126
c10333_g1_i1	c10333_g1_i1|m.7086	1.42	gi|649572305|ref|NP_001280508.1|DNA polymerase beta-like [Tribolium castaneum]	64.32	4e-85
c10333_g1_i1	c10333_g1_i1|m.7087	1.42	gi|649572305|ref|NP_001280508.1|DNA polymerase beta-like [Tribolium castaneum]	76.67	6e-41
c10333_g1_i2	c10333_g1_i2|m.7088	1.91	gi|649572305|ref|NP_001280508.1|DNA polymerase beta-like [Tribolium castaneum]	66.87	1e-158
c10334_g1_i1	c10334_g1_i1|m.7089	4.84	gi|91090888|ref|XP_973381.1|PREDICTED: YEATS domain-containing protein 4 [Tribolium castaneum]	88.55	4e-149
c10335_g2_i1	c10335_g2_i1|m.7090	11.89	gi|332373110|gb|AEE61696.1|unknown [Dendroctonus ponderosae]	68.29	2e-121
c10336_g1_i1	c10336_g1_i1|m.7091	1.26	gi|478254468|gb|ENN74718.1|hypothetical protein YQE_08700, partial [Dendroctonus ponderosae]	85.25	7e-144
c10336_g2_i1	c10336_g2_i1|m.7092	0.88	gi|642921001|ref|XP_008192648.1|PREDICTED: uncharacterized protein LOC663563 isoform X3 [Tribolium castaneum]	66.37	6e-130
c10336_g3_i1	c10336_g3_i1|m.7094	1.53	gi|270006156|gb|EFA02604.1|hypothetical protein TcasGA2_TC008323 [Tribolium castaneum]	52.11	2e-45
c10337_g1_i1	c10337_g1_i1|m.7096	5.44	gi|91093869|ref|XP_967782.1|PREDICTED: cytoplasmic FMR1-interacting protein [Tribolium castaneum]	94.02	0
c10337_g1_i2	c10337_g1_i2|m.7098	3.4	gi|91093869|ref|XP_967782.1|PREDICTED: cytoplasmic FMR1-interacting protein [Tribolium castaneum]	95.86	0
c10337_g1_i3	c10337_g1_i3|m.7099	2.68	gi|170064454|ref|XP_001867531.1|cytoplasmic FMR1-interacting protein [Culex quinquefasciatus]	91.67	0
c10337_g1_i4	c10337_g1_i4|m.7100	5.71	gi|91093869|ref|XP_967782.1|PREDICTED: cytoplasmic FMR1-interacting protein [Tribolium castaneum]	92.86	0
c10338_g1_i1	c10338_g1_i1|m.7102	10.91	gi|546685142|gb|ERL94669.1|hypothetical protein D910_11944 [Dendroctonus ponderosae]	68.16	0
c10338_g1_i2	c10338_g1_i2|m.7103	10.65	gi|546685142|gb|ERL94669.1|hypothetical protein D910_11944 [Dendroctonus ponderosae]	68.16	0
c10340_g1_i1	c10340_g1_i1|m.7105	4.71	gi|642923817|ref|XP_001816010.2|PREDICTED: ubiquitin carboxyl-terminal hydrolase CYLD [Tribolium castaneum]	60.45	0
c10341_g1_i1	c10341_g1_i1|m.7106	636.48	gi|91083833|ref|XP_973697.1|PREDICTED: endocuticle structural glycoprotein SgAbd-8 [Tribolium castaneum]	63.16	4e-72
c10347_g1_i1	c10347_g1_i1|m.7110	2.41	gi|91090808|ref|XP_970814.1|PREDICTED: tRNA (guanine-N(7)-)-methyltransferase isoform X1 [Tribolium castaneum]	79.4	1e-117
c10347_g1_i2	c10347_g1_i2|m.7111	3	gi|91090808|ref|XP_970814.1|PREDICTED: tRNA (guanine-N(7)-)-methyltransferase isoform X1 [Tribolium castaneum]	78.48	4e-140
c10348_g1_i1	c10348_g1_i1|m.7112	11.85	gi|189236068|ref|XP_971679.2|PREDICTED: inositol-tetrakisphosphate 1-kinase [Tribolium castaneum]	56.96	1e-126
c10349_g1_i1	c10349_g1_i1|m.7113	12	gi|642921101|ref|XP_975194.2|PREDICTED: something about silencing protein 10 [Tribolium castaneum]	58.08	2e-150
c10350_g1_i1	c10350_g1_i1|m.7114	27.89	gi|642933845|ref|XP_008197533.1|PREDICTED: ATP-binding cassette sub-family D member 3 [Tribolium castaneum]	73.86	0
c10352_g1_i1	c10352_g1_i1|m.7116	1.62	gi|768410434|ref|XP_011558211.1|PREDICTED: receptor expression-enhancing protein 1 isoform X3 [Plutella xylostella]	58.12	1e-92
c10352_g1_i2	c10352_g1_i2|m.7117	1.11	gi|189234163|ref|XP_967233.2|PREDICTED: receptor expression-enhancing protein 4-like [Tribolium castaneum]	73.58	7e-110
c10352_g1_i3	c10352_g1_i3|m.7118	2.08	gi|768410434|ref|XP_011558211.1|PREDICTED: receptor expression-enhancing protein 1 isoform X3 [Plutella xylostella]	59.72	4e-100
c10352_g1_i4	c10352_g1_i4|m.7119	3.25	gi|189234163|ref|XP_967233.2|PREDICTED: receptor expression-enhancing protein 4-like [Tribolium castaneum]	84.52	3e-82
c10354_g1_i1	c10354_g1_i1|m.7121	5.62	gi|817054071|ref|XP_012265460.1|PREDICTED: rRNA-processing protein UTP23 homolog [Athalia rosae]	56.39	3e-79
c10355_g1_i1	c10355_g1_i1|m.7123	25.47	gi|646701955|gb|KDR11422.1|Beta-centractin [Zootermopsis nevadensis]	86.7	0
c10356_g2_i1	c10356_g2_i1|m.7124	2.03	gi|322799570|gb|EFZ20864.1|hypothetical protein SINV_07302, partial [Solenopsis invicta]	58.82	2e-19
c10356_g3_i2	c10356_g3_i2|m.7126	1.37	gi|282720995|ref|NP_001164248.1|cytochrome P450 9Z4 [Tribolium castaneum]	51.52	3e-24
c10358_g1_i1	c10358_g1_i1|m.7129	9.36	gi|642934762|ref|XP_967447.2|PREDICTED: BTB/POZ domain-containing adapter for CUL3-mediated RhoA degradation protein 3 isoform X2 [Tribolium castaneum]	90.14	0
c10359_g1_i1	c10359_g1_i1|m.7130	1.82	gi|642912009|ref|XP_008199058.1|PREDICTED: rho guanine nucleotide exchange factor 17 isoform X1 [Tribolium castaneum]	63.48	0
c10359_g1_i2	c10359_g1_i2|m.7133	2.26	gi|642912009|ref|XP_008199058.1|PREDICTED: rho guanine nucleotide exchange factor 17 isoform X1 [Tribolium castaneum]	65.29	0
c1036_g1_i1	c1036_g1_i1|m.290	3.36	gi|642920067|ref|XP_008192192.1|PREDICTED: nuclear RNA export factor 2-like [Tribolium castaneum]	50.28	3e-180
c10360_g1_i1	c10360_g1_i1|m.7136	9.7	gi|91093509|ref|XP_969295.1|PREDICTED: ras-related protein Rab-39B [Tribolium castaneum]	92.2	6e-151
c10362_g1_i1	c10362_g1_i1|m.7137	24	gi|270005822|gb|EFA02270.1|hypothetical protein TcasGA2_TC007934 [Tribolium castaneum]	63.27	3e-79
c10362_g1_i1	c10362_g1_i1|m.7138	24	gi|703137727|ref|XP_010106531.1|Chaperone protein DnaJ [Morus notabilis]	50.82	1e-09
c10362_g1_i2	c10362_g1_i2|m.7139	31.32	gi|270005822|gb|EFA02270.1|hypothetical protein TcasGA2_TC007934 [Tribolium castaneum]	64.41	2e-81
c10362_g1_i2	c10362_g1_i2|m.7140	31.32	gi|703137727|ref|XP_010106531.1|Chaperone protein DnaJ [Morus notabilis]	50.82	1e-09
c10365_g1_i1	c10365_g1_i1|m.7148	1.68	gi|795108675|ref|XP_011882065.1|PREDICTED: phospholipase B1, membrane-associated-like isoform X2 [Vollenhovia emeryi]	50.14	3e-123
c10365_g1_i2	c10365_g1_i2|m.7149	1.76	gi|795108675|ref|XP_011882065.1|PREDICTED: phospholipase B1, membrane-associated-like isoform X2 [Vollenhovia emeryi]	50.14	2e-123
c10366_g1_i1	c10366_g1_i1|m.7150	2.51	gi|642931828|ref|XP_971231.2|PREDICTED: F-box/LRR-repeat protein 4 [Tribolium castaneum]	55.13	0
c10367_g1_i1	c10367_g1_i1|m.7151	4.1	gi|91086329|ref|XP_967308.1|PREDICTED: protein pellino isoform X3 [Tribolium castaneum]	88.01	0
c10367_g1_i2	c10367_g1_i2|m.7152	3.82	gi|642927954|ref|XP_008195460.1|PREDICTED: protein pellino isoform X2 [Tribolium castaneum]	85.06	0
c10369_g1_i1	c10369_g1_i1|m.7154	1.04	gi|646698720|gb|KDR09746.1|NCK-interacting protein with SH3 domain [Zootermopsis nevadensis]	70.59	8e-102
c10369_g1_i1	c10369_g1_i1|m.7155	1.04	gi|91090914|ref|XP_974006.1|PREDICTED: NCK-interacting protein with SH3 domain [Tribolium castaneum]	80.32	3e-99
c10369_g1_i2	c10369_g1_i2|m.7156	1.31	gi|91090914|ref|XP_974006.1|PREDICTED: NCK-interacting protein with SH3 domain [Tribolium castaneum]	61.34	1e-171
c10369_g1_i2	c10369_g1_i2|m.7157	1.31	gi|646698720|gb|KDR09746.1|NCK-interacting protein with SH3 domain [Zootermopsis nevadensis]	70.59	8e-102
c10370_g1_i1	c10370_g1_i1|m.7158	113.73	gi|478251391|gb|ENN71857.1|hypothetical protein YQE_11473, partial [Dendroctonus ponderosae]	66.47	4e-139
c10371_g1_i1	c10371_g1_i1|m.7159	89.97	gi|91090496|ref|XP_969212.1|PREDICTED: aminoacylase-1 [Tribolium castaneum]	50.49	3e-150
c10372_g1_i1	c10372_g1_i1|m.7161	1.66	gi|332373720|gb|AEE62001.1|unknown [Dendroctonus ponderosae]	54.55	4e-92
c10373_g1_i1	c10373_g1_i1|m.7162	6.32	gi|189234289|ref|XP_970161.2|PREDICTED: mitochondrial pyruvate carrier 2-like [Tribolium castaneum]	69.57	1e-52
c10375_g1_i1	c10375_g1_i1|m.7164	4.7	gi|646710235|gb|KDR15812.1|Xylosyltransferase oxt [Zootermopsis nevadensis]	55.23	0
c10376_g1_i1	c10376_g1_i1|m.7165	3.64	gi|642918422|ref|XP_008191466.1|PREDICTED: BTB/POZ domain-containing protein 10 [Tribolium castaneum]	77.95	0
c10376_g1_i2	c10376_g1_i2|m.7167	2.41	gi|478261820|gb|ENN80943.1|hypothetical protein YQE_02648, partial [Dendroctonus ponderosae]	89.66	2e-104
c10377_g1_i1	c10377_g1_i1|m.7169	207.84	gi|332372901|gb|AEE61592.1|unknown [Dendroctonus ponderosae]	74.32	5e-156
c10379_g1_i1	c10379_g1_i1|m.7171	13.83	gi|91092208|ref|XP_969730.1|PREDICTED: protein unc-50 homolog [Tribolium castaneum]	76.21	2e-138
c10380_g1_i1	c10380_g1_i1|m.7172	2.24	gi|642917173|ref|XP_008191149.1|PREDICTED: pangolin isoform X1 [Tribolium castaneum]	86.96	0
c10380_g1_i2	c10380_g1_i2|m.7174	2.24	gi|642917177|ref|XP_008191151.1|PREDICTED: pangolin isoform X3 [Tribolium castaneum]	88.6	0
c10381_g1_i1	c10381_g1_i1|m.7176	19.48	gi|91095161|ref|XP_968028.1|PREDICTED: elongator complex protein 3 [Tribolium castaneum]	82.83	0
c10383_g1_i1	c10383_g1_i1|m.7178	8.87	gi|642910507|ref|XP_008200244.1|PREDICTED: uncharacterized protein LOC660017 [Tribolium castaneum]	66.26	5e-161
c10385_g1_i1	c10385_g1_i1|m.7181	1.33	gi|641679593|ref|XP_008188629.1|PREDICTED: LOW QUALITY PROTEIN: uncharacterized protein LOC100569236, partial [Acyrthosiphon pisum]	58.82	7e-39
c10386_g1_i1	c10386_g1_i1|m.7182	26.23	gi|815767955|ref|XP_012228599.1|PREDICTED: peptidoglycan-recognition protein SC2-like [Linepithema humile]	54.97	5e-69
c10389_g1_i1	c10389_g1_i1|m.7183	0.9	gi|642911196|ref|XP_008199563.1|PREDICTED: solute carrier family 12 member 4 isoform X1 [Tribolium castaneum]	81.12	0
c10389_g1_i2	c10389_g1_i2|m.7186	0.75	gi|270014766|gb|EFA11214.1|hypothetical protein TcasGA2_TC005178 [Tribolium castaneum]	69.87	2e-57
c10389_g1_i3	c10389_g1_i3|m.7187	0.95	gi|642911196|ref|XP_008199563.1|PREDICTED: solute carrier family 12 member 4 isoform X1 [Tribolium castaneum]	80.37	0
c10390_g1_i1	c10390_g1_i1|m.7190	2.15	gi|642938853|ref|XP_008200091.1|PREDICTED: armadillo repeat-containing protein 2, partial [Tribolium castaneum]	64.45	0
c10390_g1_i2	c10390_g1_i2|m.7191	1.47	gi|642938853|ref|XP_008200091.1|PREDICTED: armadillo repeat-containing protein 2, partial [Tribolium castaneum]	63.75	0
c10391_g1_i1	c10391_g1_i1|m.7192	15.39	gi|91079302|ref|XP_966978.1|PREDICTED: serine/threonine-protein kinase RIO2 [Tribolium castaneum]	68.9	0
c10392_g1_i1	c10392_g1_i1|m.7193	322.94	gi|149588788|ref|NP_001092299.1|tyrosine hydroxylase [Tribolium castaneum]	83.09	0
c10393_g1_i1	c10393_g1_i1|m.7194	12.4	gi|242018417|ref|XP_002429673.1|hypothetical protein Phum_PHUM447260 [Pediculus humanus corporis]	54.81	4e-31
c10395_g1_i1	c10395_g1_i1|m.7197	1.25	gi|642916733|ref|XP_008192400.1|PREDICTED: homeobox protein araucan isoform X1 [Tribolium castaneum]	76.14	0
c10395_g1_i2	c10395_g1_i2|m.7198	1.48	gi|642916737|ref|XP_008192408.1|PREDICTED: homeobox protein araucan isoform X3 [Tribolium castaneum]	84.16	0
c10396_g1_i1	c10396_g1_i1|m.7199	4.02	gi|91088343|ref|XP_971105.1|PREDICTED: L-xylulose reductase [Tribolium castaneum]	64.61	4e-111
c10396_g1_i2	c10396_g1_i2|m.7200	3.88	gi|91088343|ref|XP_971105.1|PREDICTED: L-xylulose reductase [Tribolium castaneum]	64.61	4e-111
c10398_g1_i2	c10398_g1_i2|m.7204	21.06	gi|242018394|ref|XP_002429662.1|conserved hypothetical protein [Pediculus humanus corporis]	66.27	1e-32
c1040_g1_i1	c1040_g1_i1|m.292	1104.25	gi|646697936|gb|KDR09351.1|60S ribosomal protein L23a [Zootermopsis nevadensis]	73.47	1e-82
c10401_g1_i1	c10401_g1_i1|m.7207	14.94	gi|642937444|ref|XP_008198837.1|PREDICTED: ribulose-phosphate 3-epimerase [Tribolium castaneum]	83.93	4e-139
c10401_g1_i2	c10401_g1_i2|m.7208	17.48	gi|642937444|ref|XP_008198837.1|PREDICTED: ribulose-phosphate 3-epimerase [Tribolium castaneum]	83.93	4e-139
c10402_g1_i1	c10402_g1_i1|m.7209	14.98	gi|270015601|gb|EFA12049.1|hypothetical protein TcasGA2_TC001466 [Tribolium castaneum]	72.48	0
c10402_g1_i2	c10402_g1_i2|m.7210	13.94	gi|270015601|gb|EFA12049.1|hypothetical protein TcasGA2_TC001466 [Tribolium castaneum]	66.22	0
c10402_g1_i2	c10402_g1_i2|m.7211	13.94	gi|270015601|gb|EFA12049.1|hypothetical protein TcasGA2_TC001466 [Tribolium castaneum]	84.75	3e-125
c10402_g1_i3	c10402_g1_i3|m.7212	15.84	gi|642938616|ref|XP_008199867.1|PREDICTED: epidermal growth factor receptor kinase substrate 8 [Tribolium castaneum]	78.06	0
c10403_g1_i1	c10403_g1_i1|m.7214	13.28	gi|189234028|ref|XP_973216.2|PREDICTED: dual specificity mitogen-activated protein kinase kinase dSOR1 [Tribolium castaneum]	85.45	0
c10404_g1_i1	c10404_g1_i1|m.7215	43.21	gi|91077062|ref|XP_968655.1|PREDICTED: proteasome subunit alpha type-6 [Tribolium castaneum]	89.43	2e-153
c10405_g1_i1	c10405_g1_i1|m.7216	18.93	gi|91092178|ref|XP_968474.1|PREDICTED: ras-related protein Rap-2c [Tribolium castaneum]	95.58	2e-116
c10406_g1_i1	c10406_g1_i1|m.7217	6.7	gi|557783906|ref|XP_005191559.1|PREDICTED: ethanolamine kinase [Musca domestica]	53.44	2e-98
c10406_g1_i1	c10406_g1_i1|m.7218	6.7	gi|506968443|gb|AGM32565.1|ethanolamine kinase 1-like protein [Coptotermes formosanus]	53.66	9e-19
c10406_g1_i2	c10406_g1_i2|m.7219	7.89	gi|642937828|ref|XP_008200318.1|PREDICTED: ethanolamine kinase 2 [Tribolium castaneum]	50.87	2e-122
c10406_g1_i3	c10406_g1_i3|m.7220	7.69	gi|642937828|ref|XP_008200318.1|PREDICTED: ethanolamine kinase 2 [Tribolium castaneum]	50.87	2e-121
c10406_g1_i4	c10406_g1_i4|m.7221	5.72	gi|557783906|ref|XP_005191559.1|PREDICTED: ethanolamine kinase [Musca domestica]	53.44	2e-98
c10407_g1_i1	c10407_g1_i1|m.7222	4.99	gi|189235365|ref|XP_967323.2|PREDICTED: organic cation transporter protein [Tribolium castaneum]	68.05	0
c10407_g1_i2	c10407_g1_i2|m.7225	4.65	gi|189235365|ref|XP_967323.2|PREDICTED: organic cation transporter protein [Tribolium castaneum]	71.37	0
c10408_g1_i1	c10408_g1_i1|m.7228	4.83	gi|478260363|gb|ENN80110.1|hypothetical protein YQE_03469, partial [Dendroctonus ponderosae]	70.21	7e-09
c10409_g1_i1	c10409_g1_i1|m.7229	2.14	gi|91083233|ref|XP_973728.1|PREDICTED: dolichyldiphosphatase 1 [Tribolium castaneum]	80.16	1e-141
c10409_g1_i2	c10409_g1_i2|m.7230	2.26	gi|91083233|ref|XP_973728.1|PREDICTED: dolichyldiphosphatase 1 [Tribolium castaneum]	80.16	1e-141
c10410_g1_i1	c10410_g1_i1|m.7231	11.5	gi|642928435|ref|XP_008193784.1|PREDICTED: DNA-directed RNA polymerases I and III subunit RPAC1 [Tribolium castaneum]	75.89	0
c10412_g1_i1	c10412_g1_i1|m.7233	37.51	gi|189238828|ref|XP_969342.2|PREDICTED: peptidyl-alpha-hydroxyglycine alpha-amidating lyase 2 isoform X1 [Tribolium castaneum]	55.7	2e-143
c10414_g1_i1	c10414_g1_i1|m.7235	7.47	gi|642916151|ref|XP_008190906.1|PREDICTED: MKL/myocardin-like protein 2 isoform X2 [Tribolium castaneum]	69.61	0
c10415_g1_i1	c10415_g1_i1|m.7237	4.17	gi|91077822|ref|XP_970776.1|PREDICTED: uncharacterized protein LOC659370 [Tribolium castaneum]	67.12	0
c10416_g1_i1	c10416_g1_i1|m.7238	45.46	gi|170034410|ref|XP_001845067.1|conserved hypothetical protein [Culex quinquefasciatus]	95.53	6e-122
c10418_g1_i1	c10418_g1_i1|m.7240	11.75	gi|91086175|ref|XP_970802.1|PREDICTED: L-asparaginase isoform X1 [Tribolium castaneum]	57.35	2e-137
c10418_g1_i2	c10418_g1_i2|m.7241	14.91	gi|91086175|ref|XP_970802.1|PREDICTED: L-asparaginase isoform X1 [Tribolium castaneum]	57.22	3e-143
c10420_g1_i1	c10420_g1_i1|m.7244	34.34	gi|189234428|ref|XP_001816488.1|PREDICTED: coatomer subunit beta [Tribolium castaneum]	85.27	0
c10422_g2_i1	c10422_g2_i1|m.7246	4.86	gi|91091390|ref|XP_973483.1|PREDICTED: gametogenetin-binding protein 2-like [Tribolium castaneum]	61.17	0
c10423_g1_i1	c10423_g1_i1|m.7247	50.89	gi|642921267|ref|XP_008192792.1|PREDICTED: eukaryotic translation initiation factor 4 gamma 2 [Tribolium castaneum]	68.8	0
c10424_g1_i1	c10424_g1_i1|m.7249	8.52	gi|478249899|gb|ENN70406.1|hypothetical protein YQE_12912, partial [Dendroctonus ponderosae]	63.12	1e-129
c10424_g1_i2	c10424_g1_i2|m.7250	4.27	gi|91091180|ref|XP_971767.1|PREDICTED: uncharacterized protein LOC660444 [Tribolium castaneum]	75.81	3e-63
c10426_g1_i1	c10426_g1_i1|m.7252	8.94	gi|270010170|gb|EFA06618.1|hypothetical protein TcasGA2_TC009536 [Tribolium castaneum]	53.18	3e-53
c10429_g1_i1	c10429_g1_i1|m.7261	2.48	gi|189241120|ref|XP_973128.2|PREDICTED: CTD nuclear envelope phosphatase 1 homolog isoform X3 [Tribolium castaneum]	95.5	2e-71
c10429_g1_i3	c10429_g1_i3|m.7262	2.68	gi|189241120|ref|XP_973128.2|PREDICTED: CTD nuclear envelope phosphatase 1 homolog isoform X3 [Tribolium castaneum]	92.18	5e-166
c10429_g1_i4	c10429_g1_i4|m.7263	3.19	gi|189241120|ref|XP_973128.2|PREDICTED: CTD nuclear envelope phosphatase 1 homolog isoform X3 [Tribolium castaneum]	92.18	5e-166
c10432_g1_i1	c10432_g1_i1|m.7266	907.6	gi|189240524|ref|XP_971875.2|PREDICTED: 60S ribosomal protein L3 [Tribolium castaneum]	91.71	0
c10436_g1_i1	c10436_g1_i1|m.7271	2.17	gi|642921494|ref|XP_968130.3|PREDICTED: uncharacterized protein LOC656511 [Tribolium castaneum]	56.16	1e-172
c10437_g1_i1	c10437_g1_i1|m.7272	239.79	gi|357620430|gb|EHJ72625.1|hypothetical protein KGM_20169 [Danaus plexippus]	72.57	1e-52
c10438_g1_i1	c10438_g1_i1|m.7273	7.2	gi|91086963|ref|XP_973116.1|PREDICTED: protein SOX-15-like isoform X1 [Tribolium castaneum]	55.62	3e-105
c10438_g1_i2	c10438_g1_i2|m.7274	6.54	gi|91086963|ref|XP_973116.1|PREDICTED: protein SOX-15-like isoform X1 [Tribolium castaneum]	59.47	2e-107
c10441_g2_i1	c10441_g2_i1|m.7275	2.15	gi|642922377|ref|XP_008193132.1|PREDICTED: insulin-like growth factor 2 mRNA-binding protein 1 isoform X4 [Tribolium castaneum]	88.42	0
c10441_g2_i2	c10441_g2_i2|m.7276	2.19	gi|642922371|ref|XP_008193129.1|PREDICTED: insulin-like growth factor 2 mRNA-binding protein 1 isoform X1 [Tribolium castaneum]	86.12	0
c10442_g1_i1	c10442_g1_i1|m.7277	23.04	gi|646702688|gb|KDR11771.1|Integrin-linked protein kinase [Zootermopsis nevadensis]	85.49	0
c10443_g1_i1	c10443_g1_i1|m.7278	68.54	gi|91083743|ref|XP_971153.1|PREDICTED: tyrosine--tRNA ligase, cytoplasmic [Tribolium castaneum]	74.42	0
c10445_g1_i1	c10445_g1_i1|m.7281	3.46	gi|91082291|ref|XP_973881.1|PREDICTED: probable tRNA pseudouridine synthase 2 [Tribolium castaneum]	59.21	1e-130
c10445_g1_i2	c10445_g1_i2|m.7282	2.53	gi|91082291|ref|XP_973881.1|PREDICTED: probable tRNA pseudouridine synthase 2 [Tribolium castaneum]	56.91	2e-119
c10446_g1_i1	c10446_g1_i1|m.7283	9.35	gi|642911645|ref|XP_008200684.1|PREDICTED: synapse-associated protein of 47 kDa isoform X1 [Tribolium castaneum]	66.91	0
c10446_g1_i2	c10446_g1_i2|m.7284	4.49	gi|642911645|ref|XP_008200684.1|PREDICTED: synapse-associated protein of 47 kDa isoform X1 [Tribolium castaneum]	70.19	4e-171
c10447_g1_i1	c10447_g1_i1|m.7285	5.13	gi|91087565|ref|XP_971161.1|PREDICTED: RNA 3'-terminal phosphate cyclase [Tribolium castaneum]	63.69	2e-162
c10448_g1_i1	c10448_g1_i1|m.7286	10.85	gi|270014922|gb|EFA11370.1|hypothetical protein TcasGA2_TC011528 [Tribolium castaneum]	63.12	3e-141
c10448_g1_i1	c10448_g1_i1|m.7287	10.85	gi|642910313|ref|XP_969816.2|PREDICTED: alanine--glyoxylate aminotransferase 2, mitochondrial [Tribolium castaneum]	64.97	4e-88
c10448_g1_i2	c10448_g1_i2|m.7288	12.62	gi|642910313|ref|XP_969816.2|PREDICTED: alanine--glyoxylate aminotransferase 2, mitochondrial [Tribolium castaneum]	64.35	0
c10448_g1_i3	c10448_g1_i3|m.7289	9.3	gi|270014922|gb|EFA11370.1|hypothetical protein TcasGA2_TC011528 [Tribolium castaneum]	63.12	3e-141
c10448_g1_i3	c10448_g1_i3|m.7290	9.3	gi|642910313|ref|XP_969816.2|PREDICTED: alanine--glyoxylate aminotransferase 2, mitochondrial [Tribolium castaneum]	65.65	3e-53
c10448_g1_i4	c10448_g1_i4|m.7291	10.1	gi|270014922|gb|EFA11370.1|hypothetical protein TcasGA2_TC011528 [Tribolium castaneum]	62.01	2e-164
c10448_g1_i4	c10448_g1_i4|m.7292	10.1	gi|642910313|ref|XP_969816.2|PREDICTED: alanine--glyoxylate aminotransferase 2, mitochondrial [Tribolium castaneum]	65.65	3e-53
c1045_g1_i1	c1045_g1_i1|m.297	2038.59	gi|70909659|emb|CAJ17252.1|ribosomal protein L10e [Biphyllus lunatus]	93.58	2e-150
c10450_g1_i1	c10450_g1_i1|m.7293	14.87	gi|91094023|ref|XP_967468.1|PREDICTED: protein BTG1-like [Tribolium castaneum]	57.81	1e-70
c10450_g1_i2	c10450_g1_i2|m.7294	15.79	gi|91094023|ref|XP_967468.1|PREDICTED: protein BTG1-like [Tribolium castaneum]	57.81	1e-70
c10451_g1_i1	c10451_g1_i1|m.7295	6.99	gi|642918268|ref|XP_008191439.1|PREDICTED: methoprene-tolerant isoform X1 [Tribolium castaneum]	67.92	0
c10451_g1_i2	c10451_g1_i2|m.7296	5.02	gi|150170685|ref|NP_001092812.1|methoprene-tolerant [Tribolium castaneum]	70.77	0
c10451_g1_i3	c10451_g1_i3|m.7297	4.82	gi|150170685|ref|NP_001092812.1|methoprene-tolerant [Tribolium castaneum]	70.77	0
c10452_g1_i1	c10452_g1_i1|m.7298	16.49	gi|642933345|ref|XP_008197376.1|PREDICTED: charged multivesicular body protein 6-B isoform X2 [Tribolium castaneum]	68.37	9e-82
c10453_g1_i1	c10453_g1_i1|m.7299	2.65	gi|270016164|gb|EFA12612.1|hypothetical protein TcasGA2_TC006853 [Tribolium castaneum]	52.46	5e-167
c10453_g2_i1	c10453_g2_i1|m.7303	1.31	gi|270016164|gb|EFA12612.1|hypothetical protein TcasGA2_TC006853 [Tribolium castaneum]	64.48	0
c10454_g1_i1	c10454_g1_i1|m.7306	10.95	gi|642925988|ref|XP_008194720.1|PREDICTED: gamma-secretase subunit pen-2 [Tribolium castaneum]	69.31	4e-48
c10455_g1_i1	c10455_g1_i1|m.7307	20.4	gi|478255490|gb|ENN75707.1|hypothetical protein YQE_07668, partial [Dendroctonus ponderosae]	60.18	0
c10456_g1_i1	c10456_g1_i1|m.7310	5.83	gi|642929542|ref|XP_008195879.1|PREDICTED: exosome complex component RRP41 [Tribolium castaneum]	85.43	2e-161
c10457_g1_i1	c10457_g1_i1|m.7311	4.03	gi|91086631|ref|XP_966390.1|PREDICTED: abhydrolase domain-containing protein 2 [Tribolium castaneum]	80.1	0
c10458_g1_i1	c10458_g1_i1|m.7312	1.93	gi|642918990|ref|XP_008191687.1|PREDICTED: tyrosine-protein kinase Btk29A isoform X1 [Tribolium castaneum]	78.8	0
c10458_g1_i2	c10458_g1_i2|m.7313	1.69	gi|642918994|ref|XP_008191690.1|PREDICTED: tyrosine-protein kinase Btk29A isoform X3 [Tribolium castaneum]	90.54	0
c10458_g1_i3	c10458_g1_i3|m.7314	2.28	gi|642918994|ref|XP_008191690.1|PREDICTED: tyrosine-protein kinase Btk29A isoform X3 [Tribolium castaneum]	88.25	0
c10459_g1_i1	c10459_g1_i1|m.7315	9.92	gi|755923819|ref|XP_011307092.1|PREDICTED: max dimerization protein 1-like [Fopius arisanus]	68.25	6e-95
c1046_g1_i1	c1046_g1_i1|m.298	61.7	gi|189239379|ref|XP_971918.2|PREDICTED: receptor expression-enhancing protein 5 [Tribolium castaneum]	52.05	2e-62
c10460_g1_i1	c10460_g1_i1|m.7316	4.64	gi|642923339|ref|XP_008193708.1|PREDICTED: rab3 GTPase-activating protein catalytic subunit [Tribolium castaneum]	58.49	0
c10462_g1_i1	c10462_g1_i1|m.7318	18.86	gi|91077944|ref|XP_966624.1|PREDICTED: U3 small nucleolar RNA-associated protein 18 homolog [Tribolium castaneum]	58.55	0
c10464_g1_i1	c10464_g1_i1|m.7320	21.34	gi|646719341|gb|KDR21486.1|Transcription factor AP-1 [Zootermopsis nevadensis]	53.97	1e-77
c10465_g1_i1	c10465_g1_i1|m.7321	3.84	gi|91086103|ref|XP_967597.1|PREDICTED: actin-related protein 5 [Tribolium castaneum]	71.1	0
c10466_g2_i1	c10466_g2_i1|m.7322	4.84	gi|646708856|gb|KDR15003.1|AP-1 complex subunit sigma-2 [Zootermopsis nevadensis]	94.08	6e-99
c10466_g2_i2	c10466_g2_i2|m.7323	6.75	gi|332373248|gb|AEE61765.1|unknown [Dendroctonus ponderosae]	98.09	9e-108
c10468_g1_i1	c10468_g1_i1|m.7326	20.19	gi|820805538|gb|AKG92760.1|extra macrochaetae [Leptinotarsa decemlineata]	75.71	2e-67
c10470_g1_i1	c10470_g1_i1|m.7328	17.58	gi|642932262|ref|XP_008197037.1|PREDICTED: exosome complex exonuclease RRP44 [Tribolium castaneum]	72.9	0
c10473_g1_i1	c10473_g1_i1|m.7333	4.95	gi|91080987|ref|XP_974999.1|PREDICTED: WD repeat-containing protein 48 homolog [Tribolium castaneum]	85.05	0
c10475_g1_i1	c10475_g1_i1|m.7336	2.01	gi|91090488|ref|XP_968919.1|PREDICTED: inactive pancreatic lipase-related protein 1 isoform X2 [Tribolium castaneum]	50.68	3e-73
c10475_g2_i1	c10475_g2_i1|m.7337	2.4	gi|91090488|ref|XP_968919.1|PREDICTED: inactive pancreatic lipase-related protein 1 isoform X2 [Tribolium castaneum]	61.02	6e-143
c10476_g1_i1	c10476_g1_i1|m.7338	9.43	gi|91076494|ref|XP_972946.1|PREDICTED: protein CREG1 [Tribolium castaneum]	55.31	1e-73
c10477_g1_i1	c10477_g1_i1|m.7339	99.29	gi|91080113|ref|XP_967415.1|PREDICTED: eukaryotic translation initiation factor 3 subunit I [Tribolium castaneum]	78.22	0
c10479_g1_i1	c10479_g1_i1|m.7343	24.85	gi|646688760|gb|KDR06403.1|hypothetical protein L798_04000 [Zootermopsis nevadensis]	63.64	4e-35
c10479_g1_i2	c10479_g1_i2|m.7344	8.4	gi|642931544|ref|XP_008196630.1|PREDICTED: uncharacterized protein LOC658447 [Tribolium castaneum]	56.17	2e-48
c10479_g1_i3	c10479_g1_i3|m.7345	35.92	gi|646688760|gb|KDR06403.1|hypothetical protein L798_04000 [Zootermopsis nevadensis]	58.39	4e-49
c10480_g1_i1	c10480_g1_i1|m.7346	1.6	gi|642930684|ref|XP_008199986.1|PREDICTED: probable GPI-anchored adhesin-like protein PGA55 [Tribolium castaneum]	52.42	0
c10480_g1_i2	c10480_g1_i2|m.7349	1.59	gi|642930684|ref|XP_008199986.1|PREDICTED: probable GPI-anchored adhesin-like protein PGA55 [Tribolium castaneum]	52.42	0
c10480_g1_i3	c10480_g1_i3|m.7352	1.3	gi|751787882|ref|XP_011203376.1|PREDICTED: uncharacterized protein CG5098 [Bactrocera dorsalis]	55.77	3e-07
c10481_g1_i1	c10481_g1_i1|m.7355	1.05	gi|546677532|gb|ERL88351.1|hypothetical protein D910_05738 [Dendroctonus ponderosae]	90.98	1e-77
c10481_g1_i2	c10481_g1_i2|m.7356	4.85	gi|270015708|gb|EFA12156.1|hypothetical protein TcasGA2_TC002305 [Tribolium castaneum]	52.26	2e-62
c10481_g1_i3	c10481_g1_i3|m.7357	5.13	gi|270015708|gb|EFA12156.1|hypothetical protein TcasGA2_TC002305 [Tribolium castaneum]	52.26	2e-62
c10482_g1_i1	c10482_g1_i1|m.7358	2.69	gi|646703510|gb|KDR12158.1|Aromatic-L-amino-acid decarboxylase, partial [Zootermopsis nevadensis]	71.73	0
c10484_g1_i1	c10484_g1_i1|m.7360	7.52	gi|91076690|ref|XP_971724.1|PREDICTED: NADH dehydrogenase [ubiquinone] 1 alpha subcomplex assembly factor 5 [Tribolium castaneum]	79.87	0
c10486_g1_i1	c10486_g1_i1|m.7367	13.08	gi|91083729|ref|XP_970665.1|PREDICTED: Y+L amino acid transporter 2 [Tribolium castaneum]	78.35	0
c10488_g1_i1	c10488_g1_i1|m.7372	18.64	gi|642914995|ref|XP_008190475.1|PREDICTED: heterogeneous nuclear ribonucleoprotein Q-like isoform X3 [Tribolium castaneum]	88.32	0
c10488_g1_i2	c10488_g1_i2|m.7373	14.48	gi|642914995|ref|XP_008190475.1|PREDICTED: heterogeneous nuclear ribonucleoprotein Q-like isoform X3 [Tribolium castaneum]	89.94	0
c10488_g1_i2	c10488_g1_i2|m.7374	14.48	gi|270001371|gb|EEZ97818.1|hypothetical protein TcasGA2_TC000185 [Tribolium castaneum]	88.07	6e-34
c10488_g1_i3	c10488_g1_i3|m.7375	16.32	gi|642914995|ref|XP_008190475.1|PREDICTED: heterogeneous nuclear ribonucleoprotein Q-like isoform X3 [Tribolium castaneum]	89.94	0
c10488_g1_i3	c10488_g1_i3|m.7376	16.32	gi|270001371|gb|EEZ97818.1|hypothetical protein TcasGA2_TC000185 [Tribolium castaneum]	88.07	6e-34
c10489_g1_i1	c10489_g1_i1|m.7377	27.7	gi|570341966|gb|AHE77380.1|heat shock protein, partial [Lissorhoptrus oryzophilus]	53.54	1e-21
c10490_g1_i1	c10490_g1_i1|m.7378	18.53	gi|642923111|ref|XP_008193614.1|PREDICTED: dnaJ homolog subfamily C member 11 isoform X1 [Tribolium castaneum]	73.23	0
c10491_g1_i1	c10491_g1_i1|m.7379	4.65	gi|189237377|ref|XP_971339.2|PREDICTED: X-linked interleukin-1 receptor accessory protein-like 2 [Tribolium castaneum]	55.82	0
c10493_g1_i1	c10493_g1_i1|m.7381	11.99	gi|478252995|gb|ENN73376.1|hypothetical protein YQE_10003, partial [Dendroctonus ponderosae]	69.23	1e-82
c10495_g1_i1	c10495_g1_i1|m.7384	28.11	gi|189234617|ref|XP_975233.2|PREDICTED: U1 small nuclear ribonucleoprotein C [Tribolium castaneum]	92.55	5e-55
c10496_g1_i1	c10496_g1_i1|m.7385	15.48	gi|642913701|ref|XP_008201126.1|PREDICTED: lysophospholipid acyltransferase 1 [Tribolium castaneum]	64.96	0
c10499_g1_i1	c10499_g1_i1|m.7386	21.43	gi|91077048|ref|XP_968190.1|PREDICTED: coiled-coil domain-containing protein 58 [Tribolium castaneum]	62.31	4e-55
c10499_g1_i1	c10499_g1_i1|m.7387	21.43	gi|170035772|ref|XP_001845741.1|growth and transformation-dependent protein [Culex quinquefasciatus]	51.69	4e-26
c105_g1_i1	c105_g1_i1|m.34	0.75	gi|91084707|ref|XP_969633.1|PREDICTED: probable cytochrome P450 6a23 [Tribolium castaneum]	52.42	7e-39
c1050_g1_i1	c1050_g1_i1|m.299	1.61	gi|642913117|ref|XP_008201398.1|PREDICTED: uncharacterized protein LOC663672 [Tribolium castaneum]	73.31	3e-112
c10501_g1_i2	c10501_g1_i2|m.7392	0.62	gi|170064750|ref|XP_001867655.1|conserved hypothetical protein [Culex quinquefasciatus]	50.56	4e-20
c10502_g1_i1	c10502_g1_i1|m.7394	3.11	gi|91078954|ref|XP_974170.1|PREDICTED: negative elongation factor B [Tribolium castaneum]	88.03	0
c10503_g1_i1	c10503_g1_i1|m.7395	1.86	gi|91078316|ref|XP_972782.1|PREDICTED: probable methyltransferase BTM2 homolog [Tribolium castaneum]	51.39	7e-101
c10504_g1_i1	c10504_g1_i1|m.7396	25.75	gi|91082925|ref|XP_972790.1|PREDICTED: mitochondrial import inner membrane translocase subunit Tim21 [Tribolium castaneum]	66.5	1e-82
c10505_g1_i1	c10505_g1_i1|m.7397	13.2	gi|91081711|ref|XP_971334.1|PREDICTED: transmembrane protein 165 [Tribolium castaneum]	77.44	1e-136
c10506_g1_i1	c10506_g1_i1|m.7399	13.05	gi|91087219|ref|XP_975481.1|PREDICTED: pinin [Tribolium castaneum]	77.36	1e-140
c10508_g1_i1	c10508_g1_i1|m.7401	27.54	gi|91077864|ref|XP_972466.1|PREDICTED: glutaredoxin-3 [Tribolium castaneum]	63.26	4e-97
c1051_g1_i1	c1051_g1_i1|m.300	0.51	gi|795019236|ref|XP_011859509.1|PREDICTED: uncharacterized protein LOC105556996 [Vollenhovia emeryi]	53.21	5e-35
c10511_g1_i1	c10511_g1_i1|m.7404	7.07	gi|646707039|gb|KDR13973.1|WAS protein family-like protein 1 [Zootermopsis nevadensis]	50.18	4e-75
c10512_g1_i1	c10512_g1_i1|m.7405	4.81	gi|642921579|ref|XP_008192431.1|PREDICTED: MOB kinase activator-like 2 [Tribolium castaneum]	79.42	5e-137
c10512_g1_i2	c10512_g1_i2|m.7406	4.13	gi|642921579|ref|XP_008192431.1|PREDICTED: MOB kinase activator-like 2 [Tribolium castaneum]	79.42	7e-137
c10512_g1_i3	c10512_g1_i3|m.7407	3.73	gi|642921579|ref|XP_008192431.1|PREDICTED: MOB kinase activator-like 2 [Tribolium castaneum]	79.42	7e-137
c10518_g1_i1	c10518_g1_i1|m.7414	37.41	gi|91080577|ref|XP_973491.1|PREDICTED: transmembrane protein 87A [Tribolium castaneum]	69.74	0
c10519_g1_i1	c10519_g1_i1|m.7415	87.99	gi|749755812|ref|XP_011140400.1|PREDICTED: uncharacterized protein LOC105183762 isoform X2 [Harpegnathos saltator]	50	2e-08
c10520_g1_i1	c10520_g1_i1|m.7416	3.68	gi|91080603|ref|XP_974067.1|PREDICTED: RING finger protein 141 [Tribolium castaneum]	66.33	6e-35
c10520_g1_i3	c10520_g1_i3|m.7417	5.84	gi|91080603|ref|XP_974067.1|PREDICTED: RING finger protein 141 [Tribolium castaneum]	56.25	3e-35
c10520_g1_i4	c10520_g1_i4|m.7418	9.78	gi|91080603|ref|XP_974067.1|PREDICTED: RING finger protein 141 [Tribolium castaneum]	55.14	5e-81
c10521_g1_i1	c10521_g1_i1|m.7419	9.58	gi|642938802|ref|XP_008199892.1|PREDICTED: venom protease-like [Tribolium castaneum]	50.32	3e-92
c10522_g1_i1	c10522_g1_i1|m.7420	2.94	gi|642919964|ref|XP_008192146.1|PREDICTED: DNA repair protein XRCC1 isoform X1 [Tribolium castaneum]	50.99	0
c10526_g1_i1	c10526_g1_i1|m.7423	60.39	gi|649572249|ref|NP_001280546.1|protein Skeletor, isoforms B/C precursor [Tribolium castaneum]	70.38	0
c10527_g1_i2	c10527_g1_i2|m.7424	10.55	gi|91078400|ref|XP_974453.1|PREDICTED: FAD-linked sulfhydryl oxidase ALR [Tribolium castaneum]	60.74	6e-67
c10528_g1_i2	c10528_g1_i2|m.7426	5.67	gi|478251437|gb|ENN71902.1|hypothetical protein YQE_11439, partial [Dendroctonus ponderosae]	60	7e-45
c10528_g1_i3	c10528_g1_i3|m.7427	7.24	gi|642920410|ref|XP_008192336.1|PREDICTED: DNA-directed RNA polymerase I subunit rpa1 isoform X1 [Tribolium castaneum]	69.06	1e-48
c10528_g1_i5	c10528_g1_i5|m.7429	5.44	gi|642920416|ref|XP_008192339.1|PREDICTED: DNA-directed RNA polymerase I subunit rpa1 isoform X2 [Tribolium castaneum]	69.06	2e-46
c10529_g1_i1	c10529_g1_i1|m.7430	1.72	gi|642918838|ref|XP_008191608.1|PREDICTED: breast carcinoma-amplified sequence 3 homolog isoform X1 [Tribolium castaneum]	53.57	0
c10529_g1_i2	c10529_g1_i2|m.7432	1.54	gi|270005623|gb|EFA02071.1|hypothetical protein TcasGA2_TC007705 [Tribolium castaneum]	63.14	0
c1053_g2_i1	c1053_g2_i1|m.301	1.26	gi|913302009|ref|XP_013200234.1|PREDICTED: uncharacterized protein LOC106142859 [Amyelois transitella]	99.09	1e-70
c10530_g1_i2	c10530_g1_i2|m.7434	1.22	gi|282720995|ref|NP_001164248.1|cytochrome P450 9Z4 [Tribolium castaneum]	51.04	7e-167
c10531_g1_i1	c10531_g1_i1|m.7437	4.64	gi|91080239|ref|XP_972955.1|PREDICTED: TNF receptor-associated factor 6 [Tribolium castaneum]	70.18	0
c10532_g1_i1	c10532_g1_i1|m.7438	5.64	gi|189238404|ref|XP_001812043.1|PREDICTED: uncharacterized protein LOC100142307 [Tribolium castaneum]	51.25	8e-123
c10533_g1_i1	c10533_g1_i1|m.7440	1005.46	gi|270011845|gb|EFA08293.1|hypothetical protein TcasGA2_TC005928 [Tribolium castaneum]	71.57	4e-150
c10536_g1_i1	c10536_g1_i1|m.7443	62.11	gi|642921717|ref|XP_008199299.1|PREDICTED: ubiquitin-like-conjugating enzyme ATG3 [Tribolium castaneum]	83.54	0
c10537_g1_i1	c10537_g1_i1|m.7444	5.15	gi|642927610|ref|XP_008195334.1|PREDICTED: conserved oligomeric Golgi complex subunit 1 [Tribolium castaneum]	51.64	0
c10538_g1_i1	c10538_g1_i1|m.7445	15.3	gi|91082177|ref|XP_971147.1|PREDICTED: transmembrane protein 35 [Tribolium castaneum]	87.58	4e-89
c10539_g1_i1	c10539_g1_i1|m.7446	4.65	gi|91084211|ref|XP_968214.1|PREDICTED: transcriptional adapter 3 [Tribolium castaneum]	54.86	4e-108
c10540_g1_i1	c10540_g1_i1|m.7448	47.65	gi|332373948|gb|AEE62115.1|unknown [Dendroctonus ponderosae]	95.81	9e-152
c10540_g1_i2	c10540_g1_i2|m.7449	37.03	gi|332373948|gb|AEE62115.1|unknown [Dendroctonus ponderosae]	95.81	9e-152
c10541_g1_i1	c10541_g1_i1|m.7450	8.18	gi|270011735|gb|EFA08183.1|hypothetical protein TcasGA2_TC005810 [Tribolium castaneum]	51.76	3e-24
c10542_g1_i1	c10542_g1_i1|m.7451	1.76	gi|805826261|ref|XP_012153001.1|PREDICTED: lipopolysaccharide-induced tumor necrosis factor-alpha factor homolog [Megachile rotundata]	52.78	3e-17
c10542_g1_i2	c10542_g1_i2|m.7452	2.65	gi|805826261|ref|XP_012153001.1|PREDICTED: lipopolysaccharide-induced tumor necrosis factor-alpha factor homolog [Megachile rotundata]	52.78	3e-17
c10543_g1_i1	c10543_g1_i1|m.7453	1097.61	gi|665806606|ref|XP_008551549.1|PREDICTED: cuticle protein 19.8-like [Microplitis demolitor]	52.46	3e-31
c10543_g1_i2	c10543_g1_i2|m.7455	488.74	gi|665806606|ref|XP_008551549.1|PREDICTED: cuticle protein 19.8-like [Microplitis demolitor]	51.64	1e-30
c10543_g2_i1	c10543_g2_i1|m.7454	1180.5	gi|817068579|ref|XP_012256234.1|PREDICTED: cuticle protein 21-like [Athalia rosae]	52.67	2e-28
c10544_g1_i1	c10544_g1_i1|m.7456	3.69	gi|642923061|ref|XP_008200515.1|PREDICTED: sphingomyelin synthase-related 1-like [Tribolium castaneum]	71.46	0
c10545_g1_i1	c10545_g1_i1|m.7457	0.99	gi|189235087|ref|XP_001808767.1|PREDICTED: leucine-rich repeat-containing protein 16A [Tribolium castaneum]	71.38	0
c10545_g1_i2	c10545_g1_i2|m.7459	0.97	gi|189235087|ref|XP_001808767.1|PREDICTED: leucine-rich repeat-containing protein 16A [Tribolium castaneum]	73.11	0
c10547_g1_i1	c10547_g1_i1|m.7461	21.24	gi|91089913|ref|XP_972686.1|PREDICTED: facilitated trehalose transporter Tret1 [Tribolium castaneum]	50	6e-157
c10548_g1_i1	c10548_g1_i1|m.7462	9.9	gi|91077788|ref|XP_969244.1|PREDICTED: potassium channel subfamily K member 6-like isoform X2 [Tribolium castaneum]	70.19	2e-146
c10549_g1_i1	c10549_g1_i1|m.7463	3.73	gi|478263070|gb|ENN81470.1|hypothetical protein YQE_02162, partial [Dendroctonus ponderosae]	64.06	2e-45
c10549_g2_i1	c10549_g2_i1|m.7464	1.29	gi|478263070|gb|ENN81470.1|hypothetical protein YQE_02162, partial [Dendroctonus ponderosae]	55.78	1e-72
c1055_g1_i1	c1055_g1_i1|m.304	1.01	gi|546685946|gb|ERL95360.1|hypothetical protein D910_12625 [Dendroctonus ponderosae]	58.33	6e-46
c10550_g1_i1	c10550_g1_i1|m.7465	5.64	gi|645010879|ref|XP_008213618.1|PREDICTED: beta-1,3-glucan-binding protein [Nasonia vitripennis]	51.46	9e-24
c10551_g1_i1	c10551_g1_i1|m.7466	1021.37	gi|646706601|gb|KDR13737.1|Ornithine aminotransferase, mitochondrial [Zootermopsis nevadensis]	69.17	0
c10552_g1_i1	c10552_g1_i1|m.7467	70.84	gi|189236107|ref|XP_973934.2|PREDICTED: high mobility group protein DSP1-like [Tribolium castaneum]	90.7	5e-107
c10553_g1_i1	c10553_g1_i1|m.7468	11.2	gi|91085981|ref|XP_971976.1|PREDICTED: cullin-1 [Tribolium castaneum]	89.21	0
c10554_g1_i1	c10554_g1_i1|m.7469	1.9	gi|642940054|ref|XP_008200975.1|PREDICTED: ATPase family AAA domain-containing protein 2-like isoform X2 [Tribolium castaneum]	63.11	0
c10554_g1_i2	c10554_g1_i2|m.7470	1.93	gi|642940052|ref|XP_008200969.1|PREDICTED: ATPase family AAA domain-containing protein 2-like isoform X1 [Tribolium castaneum]	62.61	0
c10554_g1_i3	c10554_g1_i3|m.7471	1.9	gi|642940052|ref|XP_008200969.1|PREDICTED: ATPase family AAA domain-containing protein 2-like isoform X1 [Tribolium castaneum]	62.35	0
c10555_g1_i1	c10555_g1_i1|m.7472	6.22	gi|91089961|ref|XP_973612.1|PREDICTED: beta-1,4-galactosyltransferase 7 [Tribolium castaneum]	69.44	8e-153
c10556_g1_i1	c10556_g1_i1|m.7473	12.24	gi|91082137|ref|XP_966595.1|PREDICTED: arrestin homolog [Tribolium castaneum]	81.38	0
c10558_g1_i1	c10558_g1_i1|m.7476	2.22	gi|270004299|gb|EFA00747.1|hypothetical protein TcasGA2_TC003629 [Tribolium castaneum]	67.33	0
c10558_g1_i2	c10558_g1_i2|m.7477	1.93	gi|270004299|gb|EFA00747.1|hypothetical protein TcasGA2_TC003629 [Tribolium castaneum]	64.69	1e-143
c10559_g1_i1	c10559_g1_i1|m.7478	3.63	gi|642929804|ref|XP_975581.3|PREDICTED: phosphatidate phosphatase LPIN3 [Tribolium castaneum]	62.29	0
c10559_g1_i2	c10559_g1_i2|m.7479	2.94	gi|642929804|ref|XP_975581.3|PREDICTED: phosphatidate phosphatase LPIN3 [Tribolium castaneum]	61.28	0
c10559_g1_i3	c10559_g1_i3|m.7480	3.3	gi|642929804|ref|XP_975581.3|PREDICTED: phosphatidate phosphatase LPIN3 [Tribolium castaneum]	61.28	0
c10559_g1_i4	c10559_g1_i4|m.7481	3.71	gi|642929804|ref|XP_975581.3|PREDICTED: phosphatidate phosphatase LPIN3 [Tribolium castaneum]	63.44	0
c10559_g1_i5	c10559_g1_i5|m.7482	3.05	gi|642929804|ref|XP_975581.3|PREDICTED: phosphatidate phosphatase LPIN3 [Tribolium castaneum]	62.86	0
c10566_g1_i1	c10566_g1_i1|m.7487	6.84	gi|755944903|ref|XP_011299612.1|PREDICTED: sentrin-specific protease 1-like isoform X3 [Fopius arisanus]	51.7	1e-95
c10567_g1_i1	c10567_g1_i1|m.7488	2.21	gi|189233856|ref|XP_972507.2|PREDICTED: putative GTP-binding protein 6 [Tribolium castaneum]	57.8	1e-103
c10567_g1_i1	c10567_g1_i1|m.7489	2.21	gi|242009617|ref|XP_002425579.1|GTP-binding protein hflx, putative [Pediculus humanus corporis]	55.17	7e-12
c10569_g1_i1	c10569_g1_i1|m.7492	9.76	gi|91078340|ref|XP_973522.1|PREDICTED: palmitoyltransferase ZDHHC3 [Tribolium castaneum]	85.31	0
c10570_g1_i1	c10570_g1_i1|m.7493	9.93	gi|270003951|gb|EFA00399.1|hypothetical protein TcasGA2_TC003250 [Tribolium castaneum]	72.31	2e-160
c10571_g1_i1	c10571_g1_i1|m.7494	12.95	gi|189236774|ref|XP_001807993.1|PREDICTED: serine/threonine-protein phosphatase 4 regulatory subunit 2 [Tribolium castaneum]	70.1	4e-141
c10573_g1_i1	c10573_g1_i1|m.7496	1.86	gi|645004082|ref|XP_001607661.3|PREDICTED: beta-glucuronidase-like [Nasonia vitripennis]	62.3	7e-114
c10573_g1_i1	c10573_g1_i1|m.7497	1.86	gi|91089477|ref|XP_969208.1|PREDICTED: zinc finger HIT domain-containing protein 3 [Tribolium castaneum]	56.49	7e-42
c10573_g1_i2	c10573_g1_i2|m.7498	1.49	gi|91089483|ref|XP_969423.1|PREDICTED: beta-glucuronidase [Tribolium castaneum]	59.06	0
c10573_g1_i2	c10573_g1_i2|m.7499	1.49	gi|91089477|ref|XP_969208.1|PREDICTED: zinc finger HIT domain-containing protein 3 [Tribolium castaneum]	56.49	7e-42
c10574_g1_i1	c10574_g1_i1|m.7500	1.87	gi|139478961|gb|ABO77639.1|alpha-amylase [Musca domestica]	61.17	8e-77
c10575_g1_i1	c10575_g1_i1|m.7501	39.76	gi|646661416|gb|KDQ85826.1|Calcium-binding protein E63-1 [Zootermopsis nevadensis]	58.02	5e-59
c10576_g1_i1	c10576_g1_i1|m.7502	1.04	gi|748637166|ref|WP_039895343.1|hypothetical protein, partial [Lyngbya sp. PCC 8106]	50	1e-07
c10576_g1_i2	c10576_g1_i2|m.7505	0.8	gi|643889269|ref|WP_025267364.1|hypothetical protein [Bibersteinia trehalosi]	53.26	1e-06
c10577_g1_i1	c10577_g1_i1|m.7508	3.37	gi|189234066|ref|XP_970272.2|PREDICTED: calcium uptake protein 3, mitochondrial isoform X2 [Tribolium castaneum]	74.37	0
c10577_g1_i1	c10577_g1_i1|m.7509	3.37	gi|91076222|ref|XP_972737.1|PREDICTED: protein phosphatase methylesterase 1 [Tribolium castaneum]	51.88	8e-140
c10577_g1_i2	c10577_g1_i2|m.7510	3.64	gi|91076222|ref|XP_972737.1|PREDICTED: protein phosphatase methylesterase 1 [Tribolium castaneum]	51.88	8e-140
c10577_g1_i2	c10577_g1_i2|m.7511	3.64	gi|189234066|ref|XP_970272.2|PREDICTED: calcium uptake protein 3, mitochondrial isoform X2 [Tribolium castaneum]	84.1	2e-144
c10577_g1_i2	c10577_g1_i2|m.7512	3.64	gi|642912019|ref|XP_008199062.1|PREDICTED: calcium uptake protein 3, mitochondrial isoform X1 [Tribolium castaneum]	74.27	6e-80
c10577_g1_i3	c10577_g1_i3|m.7513	3.42	gi|642912019|ref|XP_008199062.1|PREDICTED: calcium uptake protein 3, mitochondrial isoform X1 [Tribolium castaneum]	74.34	0
c10577_g1_i3	c10577_g1_i3|m.7514	3.42	gi|91076222|ref|XP_972737.1|PREDICTED: protein phosphatase methylesterase 1 [Tribolium castaneum]	51.88	8e-140
c10579_g1_i1	c10579_g1_i1|m.7516	3.36	gi|642910324|ref|XP_008200283.1|PREDICTED: serologically defined colon cancer antigen 3 homolog isoform X1 [Tribolium castaneum]	53.81	2e-131
c10579_g1_i2	c10579_g1_i2|m.7518	3.06	gi|642910324|ref|XP_008200283.1|PREDICTED: serologically defined colon cancer antigen 3 homolog isoform X1 [Tribolium castaneum]	51.27	3e-117
c10580_g1_i1	c10580_g1_i1|m.7520	32.85	gi|642917706|ref|XP_008191338.1|PREDICTED: WD repeat-containing protein 43 [Tribolium castaneum]	50	0
c10581_g1_i1	c10581_g1_i1|m.7521	1.63	gi|642939202|ref|XP_008200380.1|PREDICTED: latrophilin Cirl [Tribolium castaneum]	74.24	0
c10581_g1_i2	c10581_g1_i2|m.7523	0.98	gi|642939202|ref|XP_008200380.1|PREDICTED: latrophilin Cirl [Tribolium castaneum]	74.78	0
c10582_g1_i1	c10582_g1_i1|m.7524	3.02	gi|478253012|gb|ENN73392.1|hypothetical protein YQE_09954, partial [Dendroctonus ponderosae]	54.49	3e-98
c10584_g1_i2	c10584_g1_i2|m.7525	8.95	gi|91081585|ref|XP_975324.1|PREDICTED: protein FAM177A1 [Tribolium castaneum]	52.24	3e-40
c10586_g1_i1	c10586_g1_i1|m.7527	3.01	gi|642930026|ref|XP_008196217.1|PREDICTED: homothorax isoform X1 [Tribolium castaneum]	94.75	0
c10586_g1_i2	c10586_g1_i2|m.7530	2.34	gi|642930026|ref|XP_008196217.1|PREDICTED: homothorax isoform X1 [Tribolium castaneum]	93.44	0
c10588_g1_i1	c10588_g1_i1|m.7533	5.66	gi|91092932|ref|XP_971939.1|PREDICTED: uncharacterized protein LOC660630 isoform X2 [Tribolium castaneum]	57.66	3e-103
c10589_g1_i1	c10589_g1_i1|m.7534	47.99	gi|642918925|ref|XP_008191659.1|PREDICTED: pyruvate carboxylase, mitochondrial isoform X2 [Tribolium castaneum]	85.91	0
c10590_g1_i1	c10590_g1_i1|m.7536	11.73	gi|91083695|ref|XP_966688.1|PREDICTED: cdc42 homolog [Tribolium castaneum]	97.91	6e-134
c10590_g1_i2	c10590_g1_i2|m.7537	11.92	gi|91083695|ref|XP_966688.1|PREDICTED: cdc42 homolog [Tribolium castaneum]	97.91	6e-134
c10592_g1_i1	c10592_g1_i1|m.7539	21.8	gi|817078775|ref|XP_012261773.1|PREDICTED: uncharacterized protein LOC105689379 isoform X1 [Athalia rosae]	53.57	5e-09
c10595_g1_i1	c10595_g1_i1|m.7543	0.84	gi|751447309|ref|XP_011177787.1|PREDICTED: myosin light chain alkali isoform X1 [Bactrocera cucurbitae]	70.64	3e-47
c10595_g1_i2	c10595_g1_i2|m.7544	0.81	gi|751447309|ref|XP_011177787.1|PREDICTED: myosin light chain alkali isoform X1 [Bactrocera cucurbitae]	70.64	3e-47
c10596_g2_i1	c10596_g2_i1|m.7545	0.92	gi|642935181|ref|XP_008199681.1|PREDICTED: uncharacterized protein LOC655640 [Tribolium castaneum]	70.67	0
c10596_g2_i2	c10596_g2_i2|m.7546	0.9	gi|642935181|ref|XP_008199681.1|PREDICTED: uncharacterized protein LOC655640 [Tribolium castaneum]	70.67	0
c10597_g1_i2	c10597_g1_i2|m.7549	3.08	gi|642931461|ref|XP_008196594.1|PREDICTED: testis-expressed sequence 2 protein isoform X2 [Tribolium castaneum]	67.28	9e-63
c10598_g1_i1	c10598_g1_i1|m.7552	1.14	gi|642911773|ref|XP_008200735.1|PREDICTED: trehalase-like isoform X1 [Tribolium castaneum]	63.2	0
c10598_g1_i2	c10598_g1_i2|m.7553	1.73	gi|642911773|ref|XP_008200735.1|PREDICTED: trehalase-like isoform X1 [Tribolium castaneum]	61.57	0
c10599_g1_i1	c10599_g1_i1|m.7554	118.06	gi|817086172|ref|XP_012265802.1|PREDICTED: stress-induced-phosphoprotein 1 isoform X2 [Athalia rosae]	68.17	0
c106_g1_i1	c106_g1_i1|m.35	0.82	gi|23956481|gb|AAN39100.1|chitinase [Araneus ventricosus]	64.15	8e-38
c1060_g1_i1	c1060_g1_i1|m.306	1.27	gi|646701731|gb|KDR11310.1|DNA primase small subunit [Zootermopsis nevadensis]	54.59	2e-163
c10600_g1_i1	c10600_g1_i1|m.7555	1.55	gi|242018490|ref|XP_002429708.1|glucose dehydrogenase precursor, putative [Pediculus humanus corporis]	53.01	3e-20
c10601_g1_i1	c10601_g1_i1|m.7557	2.38	gi|642921113|ref|XP_008192694.1|PREDICTED: LOW QUALITY PROTEIN: B-cell lymphoma/leukemia 11B [Tribolium castaneum]	82.73	0
c10601_g2_i1	c10601_g2_i1|m.7558	2.92	gi|270005111|gb|EFA01559.1|hypothetical protein TcasGA2_TC007120 [Tribolium castaneum]	80.55	0
c10603_g1_i1	c10603_g1_i1|m.7560	14.8	gi|478263262|gb|ENN81646.1|hypothetical protein YQE_01944, partial [Dendroctonus ponderosae]	56.18	1e-96
c10604_g3_i1	c10604_g3_i1|m.7561	15.66	gi|91088001|ref|XP_973768.1|PREDICTED: peptidyl-tRNA hydrolase ICT1, mitochondrial [Tribolium castaneum]	56.17	3e-61
c10605_g1_i1	c10605_g1_i1|m.7562	1.67	gi|642926098|ref|XP_008194783.1|PREDICTED: uncharacterized protein KIAA1109 [Tribolium castaneum]	73.61	0
c10606_g1_i1	c10606_g1_i1|m.7564	20.58	gi|91079574|ref|XP_966886.1|PREDICTED: ubiquitin carboxyl-terminal hydrolase [Tribolium castaneum]	61.64	4e-106
c10607_g1_i1	c10607_g1_i1|m.7565	49.51	gi|642932520|ref|XP_008197148.1|PREDICTED: LOW QUALITY PROTEIN: dihydrolipoyllysine-residue acetyltransferase component of pyruvate dehydrogenase complex, mitochondrial [Tribolium castaneum]	62.75	0
c10607_g2_i1	c10607_g2_i1|m.7566	22.41	gi|746855881|ref|XP_011058624.1|PREDICTED: G protein-activated inward rectifier potassium channel 3-like [Acromyrmex echinatior]	69.44	0
c10608_g1_i1	c10608_g1_i1|m.7567	2.34	gi|642925857|ref|XP_008190580.1|PREDICTED: venom acid phosphatase Acph-1 [Tribolium castaneum]	56.45	4e-74
c10608_g1_i1	c10608_g1_i1|m.7568	2.34	gi|546686647|gb|ERL95780.1|hypothetical protein D910_00294, partial [Dendroctonus ponderosae]	51.03	2e-42
c10608_g1_i2	c10608_g1_i2|m.7569	3.37	gi|642925857|ref|XP_008190580.1|PREDICTED: venom acid phosphatase Acph-1 [Tribolium castaneum]	51.8	3e-135
c10609_g1_i1	c10609_g1_i1|m.7571	55.42	gi|827045988|ref|YP_009142300.1|NADH dehydrogenase subunit 5 (mitochondrion) [Luciola substriata]	88.16	7e-89
c10610_g1_i1	c10610_g1_i1|m.7572	2.87	gi|546671095|gb|ERL83564.1|hypothetical protein D910_00652 [Dendroctonus ponderosae]	72.33	4e-127
c10612_g1_i1	c10612_g1_i1|m.7574	1.4	gi|642928365|ref|XP_008192713.1|PREDICTED: uncharacterized protein LOC103312832 isoform X1 [Tribolium castaneum]	63.9	2e-107
c10612_g1_i2	c10612_g1_i2|m.7575	2.47	gi|642928367|ref|XP_008192714.1|PREDICTED: uncharacterized protein LOC103312832 isoform X2 [Tribolium castaneum]	63.09	1e-171
c10613_g1_i1	c10613_g1_i1|m.7576	1.47	gi|642927067|ref|XP_008195123.1|PREDICTED: protein RIC1 homolog [Tribolium castaneum]	64.8	2e-66
c10613_g2_i1	c10613_g2_i1|m.7577	1.56	gi|642927067|ref|XP_008195123.1|PREDICTED: protein RIC1 homolog [Tribolium castaneum]	71.04	0
c10614_g1_i1	c10614_g1_i1|m.7579	4.48	gi|89274025|dbj|BAE80729.1|hypothetical protein [Luciola cruciata]	75	4e-150
c10614_g2_i1	c10614_g2_i1|m.7580	3.23	gi|89274025|dbj|BAE80729.1|hypothetical protein [Luciola cruciata]	71.07	6e-144
c10615_g2_i1	c10615_g2_i1|m.7581	2.31	gi|642936806|ref|XP_008199624.1|PREDICTED: protein sickie isoform X2 [Tribolium castaneum]	84.85	0
c10615_g2_i2	c10615_g2_i2|m.7583	2.11	gi|642936804|ref|XP_008199623.1|PREDICTED: protein sickie isoform X1 [Tribolium castaneum]	78.92	0
c10616_g2_i1	c10616_g2_i1|m.7585	0.2	gi|751221840|ref|XP_011164121.1|PREDICTED: uncharacterized protein LOC105198945 [Solenopsis invicta]	50.99	4e-41
c10616_g2_i1	c10616_g2_i1|m.7586	0.2	gi|795009415|ref|XP_011861614.1|PREDICTED: uncharacterized protein LOC105558508 [Vollenhovia emeryi]	55.24	2e-74
c10616_g2_i2	c10616_g2_i2|m.7587	0.61	gi|751221840|ref|XP_011164121.1|PREDICTED: uncharacterized protein LOC105198945 [Solenopsis invicta]	50.99	4e-41
c10616_g2_i2	c10616_g2_i2|m.7588	0.61	gi|768421201|ref|XP_011551400.1|PREDICTED: uncharacterized protein LOC105383086 [Plutella xylostella]	51.96	4e-29
c10616_g2_i3	c10616_g2_i3|m.7589	0.53	gi|795015053|ref|XP_011884091.1|PREDICTED: uncharacterized protein LOC105571233 [Vollenhovia emeryi]	62.09	7e-59
c10616_g2_i4	c10616_g2_i4|m.7590	0.27	gi|795009415|ref|XP_011861614.1|PREDICTED: uncharacterized protein LOC105558508 [Vollenhovia emeryi]	55.45	1e-78
c10617_g1_i1	c10617_g1_i1|m.7591	15.13	gi|91089747|ref|XP_975172.1|PREDICTED: bifunctional coenzyme A synthase-like isoform X1 [Tribolium castaneum]	58.33	0
c10618_g1_i1	c10618_g1_i1|m.7592	14.36	gi|189234792|ref|XP_001807073.1|PREDICTED: zinc finger protein 571 [Tribolium castaneum]	53.12	0
c10619_g1_i1	c10619_g1_i1|m.7594	19.19	gi|91090862|ref|XP_972769.1|PREDICTED: COP9 signalosome complex subunit 5 [Tribolium castaneum]	93.02	0
c1062_g1_i1	c1062_g1_i1|m.307	1306.63	gi|909569822|ref|XP_013140431.1|PREDICTED: tropomyosin-2 isoform X21 [Papilio polytes]	93.24	6e-161
c10620_g1_i1	c10620_g1_i1|m.7595	13.89	gi|91093953|ref|XP_966436.1|PREDICTED: uncharacterized protein LOC655909 isoform X2 [Tribolium castaneum]	55.67	5e-82
c10622_g1_i1	c10622_g1_i1|m.7598	24.69	gi|642934585|ref|XP_008197727.1|PREDICTED: mediator of RNA polymerase II transcription subunit 9 isoform X2 [Tribolium castaneum]	76.99	9e-55
c10623_g1_i1	c10623_g1_i1|m.7599	21.44	gi|189241236|ref|XP_972549.2|PREDICTED: mitochondrial ribonuclease P protein 1 homolog [Tribolium castaneum]	62.28	6e-151
c10624_g1_i1	c10624_g1_i1|m.7600	0.94	gi|189237803|ref|XP_973331.2|PREDICTED: uncharacterized protein LOC662121 isoform X1 [Tribolium castaneum]	50.55	0
c10624_g1_i2	c10624_g1_i2|m.7601	1.01	gi|642924512|ref|XP_008194326.1|PREDICTED: uncharacterized protein LOC662121 isoform X2 [Tribolium castaneum]	50.55	0
c10626_g1_i1	c10626_g1_i1|m.7603	18.73	gi|642933904|ref|XP_008197561.1|PREDICTED: regucalcin-like [Tribolium castaneum]	54.05	4e-122
c10627_g1_i1	c10627_g1_i1|m.7604	118.58	gi|270297178|ref|NP_001161915.1|cuticular protein analogous to peritrophins 3-E [Tribolium castaneum]	62.04	1e-101
c10629_g1_i1	c10629_g1_i1|m.7605	2.4	gi|91079794|ref|XP_966414.1|PREDICTED: tyrosine-protein kinase Src64B [Tribolium castaneum]	81.02	0
c10629_g1_i2	c10629_g1_i2|m.7606	3.01	gi|91079794|ref|XP_966414.1|PREDICTED: tyrosine-protein kinase Src64B [Tribolium castaneum]	81.02	0
c10629_g1_i3	c10629_g1_i3|m.7608	3.14	gi|91079794|ref|XP_966414.1|PREDICTED: tyrosine-protein kinase Src64B [Tribolium castaneum]	81.02	0
c1063_g1_i1	c1063_g1_i1|m.308	119.51	gi|91091928|ref|XP_967487.1|PREDICTED: eukaryotic translation initiation factor 4B [Tribolium castaneum]	55.36	2e-100
c10630_g1_i1	c10630_g1_i1|m.7609	16.3	gi|91083689|ref|XP_966502.1|PREDICTED: hydroxysteroid dehydrogenase-like protein 1 [Tribolium castaneum]	62.87	2e-143
c10631_g1_i1	c10631_g1_i1|m.7610	2.3	gi|642926049|ref|XP_008194744.1|PREDICTED: tetratricopeptide repeat protein 12-like [Tribolium castaneum]	58.85	1e-81
c10632_g1_i1	c10632_g1_i1|m.7611	5.07	gi|642914485|ref|XP_008201694.1|PREDICTED: uncharacterized protein C6orf106 homolog isoform X1 [Tribolium castaneum]	67.71	9e-108
c10632_g1_i2	c10632_g1_i2|m.7612	3.57	gi|642914485|ref|XP_008201694.1|PREDICTED: uncharacterized protein C6orf106 homolog isoform X1 [Tribolium castaneum]	67.71	9e-108
c10633_g1_i2	c10633_g1_i2|m.7613	3.32	gi|91091212|ref|XP_966668.1|PREDICTED: probable RISC-loading complex subunit BRAFLDRAFT_242885 isoform X1 [Tribolium castaneum]	75.4	0
c10634_g1_i1	c10634_g1_i1|m.7614	18.78	gi|91080041|ref|XP_972705.1|PREDICTED: tumor susceptibility gene 101 protein [Tribolium castaneum]	70.86	0
c10635_g1_i1	c10635_g1_i1|m.7615	7.53	gi|642927466|ref|XP_008195284.1|PREDICTED: protein arginine N-methyltransferase 6 [Tribolium castaneum]	58.46	8e-53
c10635_g1_i2	c10635_g1_i2|m.7616	14.76	gi|642927466|ref|XP_008195284.1|PREDICTED: protein arginine N-methyltransferase 6 [Tribolium castaneum]	60	6e-156
c10637_g1_i4	c10637_g1_i4|m.7619	2.66	gi|91092284|ref|XP_968475.1|PREDICTED: 1-acyl-sn-glycerol-3-phosphate acyltransferase alpha [Tribolium castaneum]	65.8	2e-131
c10638_g1_i1	c10638_g1_i1|m.7620	33.83	gi|91090182|ref|XP_966481.1|PREDICTED: methenyltetrahydrofolate synthase domain-containing protein [Tribolium castaneum]	54.76	5e-160
c10641_g1_i1	c10641_g1_i1|m.7626	32.2	gi|91077058|ref|XP_968505.1|PREDICTED: importin subunit alpha-7 [Tribolium castaneum]	84.79	0
c10642_g1_i1	c10642_g1_i1|m.7627	6.43	gi|158294264|ref|XP_001688667.1|AGAP005504-PC [Anopheles gambiae str. PEST]	58.63	2e-96
c10643_g1_i1	c10643_g1_i1|m.7628	13.38	gi|817189114|ref|XP_012289157.1|PREDICTED: RNA-binding protein lark isoform X1 [Orussus abietinus]	61.86	2e-25
c10643_g1_i2	c10643_g1_i2|m.7629	26.33	gi|91088839|ref|XP_970745.1|PREDICTED: RNA-binding protein lark [Tribolium castaneum]	82.68	0
c10643_g1_i3	c10643_g1_i3|m.7630	36.62	gi|91088839|ref|XP_970745.1|PREDICTED: RNA-binding protein lark [Tribolium castaneum]	89.66	0
c10645_g1_i1	c10645_g1_i1|m.7633	32.14	gi|642923955|ref|XP_008193939.1|PREDICTED: uncharacterized protein LOC100141833 [Tribolium castaneum]	61.49	2e-52
c10646_g1_i1	c10646_g1_i1|m.7634	3.47	gi|478250286|gb|ENN70783.1|hypothetical protein YQE_12448, partial [Dendroctonus ponderosae]	56.12	1e-32
c10646_g1_i2	c10646_g1_i2|m.7635	4.21	gi|755958995|ref|XP_011304250.1|PREDICTED: RING finger and CHY zinc finger domain-containing protein 1-like [Fopius arisanus]	51.74	6e-56
c10647_g1_i1	c10647_g1_i1|m.7636	1.37	gi|642931337|ref|XP_008196536.1|PREDICTED: centrosomal protein of 162 kDa [Tribolium castaneum]	52.34	0
c10647_g1_i2	c10647_g1_i2|m.7638	1.53	gi|642931337|ref|XP_008196536.1|PREDICTED: centrosomal protein of 162 kDa [Tribolium castaneum]	52.26	0
c10648_g1_i1	c10648_g1_i1|m.7640	7.9	gi|189234915|ref|XP_001809744.1|PREDICTED: biogenesis of lysosome-related organelles complex 1 subunit 3 [Tribolium castaneum]	51.88	3e-45
c10648_g1_i2	c10648_g1_i2|m.7641	5.62	gi|189234915|ref|XP_001809744.1|PREDICTED: biogenesis of lysosome-related organelles complex 1 subunit 3 [Tribolium castaneum]	53.08	5e-38
c10650_g1_i1	c10650_g1_i1|m.7643	5.09	gi|91091932|ref|XP_966409.1|PREDICTED: structural maintenance of chromosomes protein 3 [Tribolium castaneum]	90.91	0
c10650_g1_i1	c10650_g1_i1|m.7644	5.09	gi|91091932|ref|XP_966409.1|PREDICTED: structural maintenance of chromosomes protein 3 [Tribolium castaneum]	85.49	0
c10651_g1_i1	c10651_g1_i1|m.7646	181.54	gi|642916856|ref|XP_968783.3|PREDICTED: zinc finger protein on ecdysone puffs [Tribolium castaneum]	50.47	4e-170
c10652_g1_i1	c10652_g1_i1|m.7648	21.35	gi|189235583|ref|XP_001807381.1|PREDICTED: epimerase family protein SDR39U1 [Tribolium castaneum]	61.67	2e-137
c10653_g1_i1	c10653_g1_i1|m.7649	56.29	gi|113951715|ref|NP_001039287.1|chemosensory protein 5 precursor [Tribolium castaneum]	50.34	5e-38
c10656_g1_i1	c10656_g1_i1|m.7653	87.21	gi|270008876|gb|EFA05324.1|hypothetical protein TcasGA2_TC015488 [Tribolium castaneum]	52.68	8e-105
c10657_g2_i1	c10657_g2_i1|m.7655	2.19	gi|642912884|ref|XP_008201294.1|PREDICTED: dentin sialophosphoprotein isoform X3 [Tribolium castaneum]	51.56	5e-156
c10657_g2_i2	c10657_g2_i2|m.7656	2.18	gi|642912884|ref|XP_008201294.1|PREDICTED: dentin sialophosphoprotein isoform X3 [Tribolium castaneum]	50.7	3e-179
c10658_g1_i1	c10658_g1_i1|m.7657	19.18	gi|91090496|ref|XP_969212.1|PREDICTED: aminoacylase-1 [Tribolium castaneum]	50.5	2e-143
c10658_g1_i2	c10658_g1_i2|m.7658	22.6	gi|91090496|ref|XP_969212.1|PREDICTED: aminoacylase-1 [Tribolium castaneum]	50.63	7e-143
c10660_g1_i1	c10660_g1_i1|m.7660	2.66	gi|91083715|ref|XP_970185.1|PREDICTED: RNA-binding protein 45 [Tribolium castaneum]	62.05	0
c10660_g1_i2	c10660_g1_i2|m.7661	3.15	gi|91083715|ref|XP_970185.1|PREDICTED: RNA-binding protein 45 [Tribolium castaneum]	62.05	0
c10661_g1_i1	c10661_g1_i1|m.7662	15.76	gi|189238143|ref|XP_001814545.1|PREDICTED: synaptosomal-associated protein 29 [Tribolium castaneum]	60.32	1e-93
c10661_g1_i2	c10661_g1_i2|m.7664	13.26	gi|189238143|ref|XP_001814545.1|PREDICTED: synaptosomal-associated protein 29 [Tribolium castaneum]	60.82	4e-93
c10662_g1_i1	c10662_g1_i1|m.7666	6.7	gi|913334458|ref|XP_013198945.1|PREDICTED: uncharacterized protein LOC106141854, partial [Amyelois transitella]	51.43	1e-15
c10664_g1_i1	c10664_g1_i1|m.7668	1.48	gi|642914174|ref|XP_008201575.1|PREDICTED: KAT8 regulatory NSL complex subunit 3 isoform X2 [Tribolium castaneum]	50.76	0
c10664_g1_i1	c10664_g1_i1|m.7669	1.48	gi|270001579|gb|EEZ98026.1|hypothetical protein TcasGA2_TC000427 [Tribolium castaneum]	55.48	5e-53
c10664_g1_i2	c10664_g1_i2|m.7671	1.53	gi|642914174|ref|XP_008201575.1|PREDICTED: KAT8 regulatory NSL complex subunit 3 isoform X2 [Tribolium castaneum]	50.96	0
c10664_g1_i2	c10664_g1_i2|m.7672	1.53	gi|270001579|gb|EEZ98026.1|hypothetical protein TcasGA2_TC000427 [Tribolium castaneum]	55.48	5e-53
c10666_g1_i1	c10666_g1_i1|m.7675	5.35	gi|805811160|ref|XP_012147322.1|PREDICTED: zinc finger CCHC domain-containing protein 8 homolog isoform X2 [Megachile rotundata]	58.75	5e-17
c10667_g1_i1	c10667_g1_i1|m.7676	4.64	gi|91078490|ref|XP_968588.1|PREDICTED: COP9 signalosome complex subunit 1 [Tribolium castaneum]	92.23	0
c10667_g1_i2	c10667_g1_i2|m.7677	4.31	gi|91078490|ref|XP_968588.1|PREDICTED: COP9 signalosome complex subunit 1 [Tribolium castaneum]	90.97	0
c10668_g1_i1	c10668_g1_i1|m.7678	18.42	gi|646702236|gb|KDR11570.1|Phosphatidylinositol N-acetylglucosaminyltransferase subunit P [Zootermopsis nevadensis]	54.37	2e-30
c10668_g1_i1	c10668_g1_i1|m.7679	18.42	gi|642925089|ref|XP_008194165.1|PREDICTED: EKC/KEOPS complex subunit LAGE3 isoform X1 [Tribolium castaneum]	58.82	1e-26
c10669_g1_i1	c10669_g1_i1|m.7680	396.74	gi|189233742|ref|XP_971800.2|PREDICTED: arginine kinase isoform X2 [Tribolium castaneum]	90.99	0
c10670_g1_i1	c10670_g1_i1|m.7682	394.88	gi|340721129|ref|XP_003398978.1|PREDICTED: 60S ribosomal protein L32 [Bombus terrestris]	93.28	5e-86
c10671_g1_i1	c10671_g1_i1|m.7683	3.19	gi|189236109|ref|XP_001813546.1|PREDICTED: nucleoporin Nup37 isoform X2 [Tribolium castaneum]	51.44	1e-108
c10672_g1_i1	c10672_g1_i1|m.7684	8.17	gi|642921389|ref|XP_008192846.1|PREDICTED: protein YIPF5 [Tribolium castaneum]	50.62	2e-07
c10672_g1_i2	c10672_g1_i2|m.7685	11.95	gi|642921389|ref|XP_008192846.1|PREDICTED: protein YIPF5 [Tribolium castaneum]	74.19	4e-116
c10673_g1_i1	c10673_g1_i1|m.7686	8.53	gi|91087121|ref|XP_975196.1|PREDICTED: proliferating cell nuclear antigen [Tribolium castaneum]	83.33	4e-136
c10674_g1_i1	c10674_g1_i1|m.7687	1.92	gi|27475659|emb|CAD59772.1|putative alpha3-fucosyltransferase [Homo sapiens]	50.18	6e-82
c10675_g1_i1	c10675_g1_i1|m.7688	13.95	gi|478262468|gb|ENN81139.1|hypothetical protein YQE_02506, partial [Dendroctonus ponderosae]	68.3	0
c10677_g1_i1	c10677_g1_i1|m.7691	2.44	gi|91095123|ref|XP_970890.1|PREDICTED: dehydrogenase/reductase SDR family member 11 [Tribolium castaneum]	53.48	4e-73
c10678_g1_i1	c10678_g1_i1|m.7692	2.08	gi|642921909|ref|XP_967739.2|PREDICTED: peptide chain release factor 1-like, mitochondrial [Tribolium castaneum]	57.33	3e-149
c10679_g1_i1	c10679_g1_i1|m.7693	16.9	gi|91090063|ref|XP_969355.1|PREDICTED: protein SCO1 homolog, mitochondrial [Tribolium castaneum]	64.71	2e-121
c1068_g1_i1	c1068_g1_i1|m.311	1.3	gi|642933430|ref|XP_008197415.1|PREDICTED: ankyrin repeat and fibronectin type-III domain-containing protein 1 isoform X5 [Tribolium castaneum]	63.59	2e-58
c10680_g1_i1	c10680_g1_i1|m.7694	2.53	gi|189237437|ref|XP_001815618.1|PREDICTED: alpha-tocopherol transfer protein-like [Tribolium castaneum]	55.41	1e-111
c10680_g1_i2	c10680_g1_i2|m.7695	2.09	gi|189237437|ref|XP_001815618.1|PREDICTED: alpha-tocopherol transfer protein-like [Tribolium castaneum]	55.41	1e-111
c10683_g1_i1	c10683_g1_i1|m.7697	49.56	gi|282721012|ref|NP_001164206.1|NADH dehydrogenase (ubiquinone) Fe-S protein 5, 15kDa (NADH-coenzyme Q reductase) [Tribolium castaneum]	55.45	1e-31
c10683_g1_i2	c10683_g1_i2|m.7698	28.74	gi|282721012|ref|NP_001164206.1|NADH dehydrogenase (ubiquinone) Fe-S protein 5, 15kDa (NADH-coenzyme Q reductase) [Tribolium castaneum]	55.45	1e-31
c10684_g1_i1	c10684_g1_i1|m.7699	11.43	gi|91094119|ref|XP_968179.1|PREDICTED: mannose-1-phosphate guanyltransferase alpha-A [Tribolium castaneum]	78.12	0
c10684_g1_i2	c10684_g1_i2|m.7700	7.93	gi|91094119|ref|XP_968179.1|PREDICTED: mannose-1-phosphate guanyltransferase alpha-A [Tribolium castaneum]	75.44	2e-151
c10685_g1_i1	c10685_g1_i1|m.7701	12.97	gi|795041609|ref|XP_011866992.1|PREDICTED: probable small nuclear ribonucleoprotein Sm D2 [Vollenhovia emeryi]	87.18	9e-61
c10686_g1_i1	c10686_g1_i1|m.7702	2.16	gi|91077456|ref|XP_967801.1|PREDICTED: sine oculis-binding protein homolog [Tribolium castaneum]	51.58	6e-85
c10686_g1_i2	c10686_g1_i2|m.7703	1.84	gi|91077456|ref|XP_967801.1|PREDICTED: sine oculis-binding protein homolog [Tribolium castaneum]	51.45	4e-95
c10687_g1_i1	c10687_g1_i1|m.7704	8.6	gi|642928862|ref|XP_008195593.1|PREDICTED: probable ATP-dependent RNA helicase DDX43 [Tribolium castaneum]	67.08	0
c10691_g1_i1	c10691_g1_i1|m.7708	67.97	gi|91086675|ref|XP_968460.1|PREDICTED: serine--tRNA ligase, cytoplasmic [Tribolium castaneum]	79.32	0
c10692_g1_i1	c10692_g1_i1|m.7709	30.75	gi|642914669|ref|XP_008190307.1|PREDICTED: uncharacterized protein LOC662983 isoform X2 [Tribolium castaneum]	72.05	0
c10694_g1_i1	c10694_g1_i1|m.7712	65.94	gi|91078982|ref|XP_974523.1|PREDICTED: pyruvate dehydrogenase E1 component subunit alpha, mitochondrial [Tribolium castaneum]	78.28	0
c10695_g1_i1	c10695_g1_i1|m.7713	4.39	gi|270001023|gb|EEZ97470.1|hypothetical protein TcasGA2_TC011301 [Tribolium castaneum]	68.64	0
c10697_g1_i1	c10697_g1_i1|m.7714	86.02	gi|189236353|ref|XP_001807129.1|PREDICTED: signal recognition particle receptor subunit alpha homolog [Tribolium castaneum]	78.72	0
c10698_g1_i1	c10698_g1_i1|m.7717	2.71	gi|907597688|ref|XP_013098526.1|PREDICTED: glutamate-gated chloride channel isoform X20 [Stomoxys calcitrans]	51.2	3e-142
c10699_g1_i1	c10699_g1_i1|m.7718	17.58	gi|910326210|ref|XP_013166243.1|PREDICTED: uncharacterized protein LOC106116775 [Papilio xuthus]	58.14	3e-06
c1070_g1_i1	c1070_g1_i1|m.313	352.56	gi|91089935|ref|XP_973085.1|PREDICTED: nucleoplasmin-like protein isoform X2 [Tribolium castaneum]	76.74	5e-69
c10700_g2_i1	c10700_g2_i1|m.7720	8.52	gi|642928184|ref|XP_008195481.1|PREDICTED: putative esterase isoform X1 [Tribolium castaneum]	58.37	2e-75
c10701_g1_i1	c10701_g1_i1|m.7721	13.61	gi|642939916|ref|XP_973092.3|PREDICTED: trafficking protein particle complex subunit 5 [Tribolium castaneum]	89.3	1e-122
c10702_g1_i1	c10702_g1_i1|m.7722	7.31	gi|642912369|ref|XP_008199613.1|PREDICTED: diuretic hormone class 2 isoform X3 [Tribolium castaneum]	67.86	6e-45
c10703_g1_i1	c10703_g1_i1|m.7723	9.53	gi|91087837|ref|XP_967757.1|PREDICTED: putative fatty acyl-CoA reductase CG5065 [Tribolium castaneum]	54.79	0
c10704_g1_i1	c10704_g1_i1|m.7724	16.8	gi|478261399|gb|ENN80776.1|hypothetical protein YQE_02785, partial [Dendroctonus ponderosae]	72.54	7e-66
c10704_g1_i1	c10704_g1_i1|m.7725	16.8	gi|383855900|ref|XP_003703448.1|PREDICTED: DNA-directed RNA polymerase I subunit RPA12 [Megachile rotundata]	60.77	1e-49
c10705_g1_i1	c10705_g1_i1|m.7726	5.72	gi|91093537|ref|XP_966761.1|PREDICTED: cysteine-rich hydrophobic domain 2 protein [Tribolium castaneum]	90.96	3e-90
c10709_g1_i1	c10709_g1_i1|m.7728	0.89	gi|270017149|gb|EFA13595.1|hypothetical protein TcasGA2_TC006904 [Tribolium castaneum]	50.34	4e-96
c10709_g1_i2	c10709_g1_i2|m.7729	1.3	gi|91079971|ref|XP_969899.1|PREDICTED: beta-1,3-galactosyltransferase 5 [Tribolium castaneum]	50.48	2e-97
c10710_g1_i1	c10710_g1_i1|m.7730	1.95	gi|674071011|ref|XP_008842621.1|PREDICTED: heat shock factor protein 3-like [Nannospalax galili]	51.38	8e-25
c10710_g1_i2	c10710_g1_i2|m.7731	3.7	gi|893720951|ref|NP_001297683.1|heat shock factor protein 3 isoform 1 [Mus musculus]	51.43	2e-22
c10711_g1_i1	c10711_g1_i1|m.7732	98.22	gi|91088569|ref|XP_973042.1|PREDICTED: hydroxyacyl-coenzyme A dehydrogenase, mitochondrial [Tribolium castaneum]	68.87	3e-159
c10712_g1_i1	c10712_g1_i1|m.7734	6.04	gi|642910499|ref|XP_008200240.1|PREDICTED: G protein alpha i subunit [Tribolium castaneum]	94.66	0
c10713_g1_i1	c10713_g1_i1|m.7735	24.01	gi|478251961|gb|ENN72399.1|hypothetical protein YQE_11033, partial [Dendroctonus ponderosae]	75.69	0
c10714_g1_i1	c10714_g1_i1|m.7736	3.29	gi|642927330|ref|XP_008195223.1|PREDICTED: STE20-related kinase adapter protein alpha [Tribolium castaneum]	64.96	3e-172
c10715_g1_i1	c10715_g1_i1|m.7737	66.55	gi|270014159|gb|EFA10607.1|hypothetical protein TcasGA2_TC012868 [Tribolium castaneum]	79.56	3e-121
c10715_g1_i1	c10715_g1_i1|m.7738	66.55	gi|270014159|gb|EFA10607.1|hypothetical protein TcasGA2_TC012868 [Tribolium castaneum]	53.1	2e-45
c10715_g1_i2	c10715_g1_i2|m.7739	46.38	gi|642936630|ref|XP_008198515.1|PREDICTED: serine-arginine protein 55-like [Tribolium castaneum]	77.09	5e-69
c10715_g1_i2	c10715_g1_i2|m.7740	46.38	gi|270014159|gb|EFA10607.1|hypothetical protein TcasGA2_TC012868 [Tribolium castaneum]	53.1	2e-45
c10716_g1_i1	c10716_g1_i1|m.7741	9.52	gi|332376085|gb|AEE63183.1|unknown [Dendroctonus ponderosae]	89.18	0
c10716_g1_i2	c10716_g1_i2|m.7742	7.77	gi|332376085|gb|AEE63183.1|unknown [Dendroctonus ponderosae]	89.73	0
c10718_g1_i1	c10718_g1_i1|m.7744	6.74	gi|642927818|ref|XP_008195414.1|PREDICTED: zinc finger FYVE domain-containing protein 19 [Tribolium castaneum]	63.78	5e-137
c1072_g1_i1	c1072_g1_i1|m.314	785.3	gi|332373968|gb|AEE62125.1|unknown [Dendroctonus ponderosae]	75.45	4e-116
c10720_g1_i1	c10720_g1_i1|m.7746	4.24	gi|91093142|ref|XP_969809.1|PREDICTED: cell division cycle protein 27 homolog [Tribolium castaneum]	65.41	0
c10722_g1_i1	c10722_g1_i1|m.7748	11.93	gi|91090882|ref|XP_973170.1|PREDICTED: death-associated protein kinase related [Tribolium castaneum]	65.3	2e-180
c10724_g1_i1	c10724_g1_i1|m.7749	9.12	gi|478250264|gb|ENN70764.1|hypothetical protein YQE_12552, partial [Dendroctonus ponderosae]	53.76	5e-110
c10725_g1_i1	c10725_g1_i1|m.7750	7.62	gi|270013858|gb|EFA10306.1|hypothetical protein TcasGA2_TC012522 [Tribolium castaneum]	60.35	4e-167
c10725_g1_i2	c10725_g1_i2|m.7751	8.24	gi|270013858|gb|EFA10306.1|hypothetical protein TcasGA2_TC012522 [Tribolium castaneum]	59.75	7e-165
c10726_g1_i1	c10726_g1_i1|m.7752	7.07	gi|189236857|ref|XP_974302.2|PREDICTED: proton-coupled amino acid transporter 4 [Tribolium castaneum]	65.51	0
c10726_g1_i2	c10726_g1_i2|m.7753	7.23	gi|189236857|ref|XP_974302.2|PREDICTED: proton-coupled amino acid transporter 4 [Tribolium castaneum]	67.89	0
c10727_g1_i1	c10727_g1_i1|m.7754	10.96	gi|302846803|ref|XP_002954937.1|hypothetical protein VOLCADRAFT_118906 [Volvox carteri f. nagariensis]	58.97	8e-06
c10728_g1_i1	c10728_g1_i1|m.7755	17.65	gi|646700412|gb|KDR10573.1|Adenylosuccinate synthetase [Zootermopsis nevadensis]	59.81	0
c10729_g1_i1	c10729_g1_i1|m.7756	6.74	gi|91081899|ref|XP_976020.1|PREDICTED: cyclin-Y-like protein 1 [Tribolium castaneum]	90.53	0
c1073_g1_i1	c1073_g1_i1|m.315	1.14	gi|270003283|gb|EEZ99730.1|hypothetical protein TcasGA2_TC002499 [Tribolium castaneum]	65	7e-38
c10736_g2_i1	c10736_g2_i1|m.7765	2.58	gi|507188118|gb|AGM39620.1|nubbin protein short isoform [Tribolium castaneum]	72.48	0
c10736_g2_i2	c10736_g2_i2|m.7766	2.69	gi|507188118|gb|AGM39620.1|nubbin protein short isoform [Tribolium castaneum]	77.3	0
c10739_g1_i1	c10739_g1_i1|m.7767	6.71	gi|646716364|gb|KDR19644.1|Fem-1-like protein B [Zootermopsis nevadensis]	72.32	0
c10739_g1_i1	c10739_g1_i1|m.7768	6.71	gi|646716364|gb|KDR19644.1|Fem-1-like protein B [Zootermopsis nevadensis]	70.35	3e-95
c10739_g1_i2	c10739_g1_i2|m.7770	3.59	gi|91087297|ref|XP_975561.1|PREDICTED: protein fem-1 homolog B isoform X2 [Tribolium castaneum]	75.98	3e-94
c10740_g2_i1	c10740_g2_i1|m.7772	22.93	gi|91086839|ref|XP_974133.1|PREDICTED: transmembrane protein 14C [Tribolium castaneum]	73.15	4e-50
c10745_g1_i1	c10745_g1_i1|m.7783	4.74	gi|642935662|ref|XP_008198105.1|PREDICTED: cytochrome b reductase 1 isoform X2 [Tribolium castaneum]	73.42	7e-138
c10745_g1_i2	c10745_g1_i2|m.7785	6.12	gi|270013939|gb|EFA10387.1|hypothetical protein TcasGA2_TC012618 [Tribolium castaneum]	72.37	6e-118
c10745_g1_i3	c10745_g1_i3|m.7786	7.98	gi|91090684|ref|XP_974597.1|PREDICTED: cytochrome b reductase 1 isoform X3 [Tribolium castaneum]	75.67	8e-129
c10746_g1_i1	c10746_g1_i1|m.7787	28.57	gi|91081253|ref|XP_975655.1|PREDICTED: translation initiation factor eIF-2B subunit delta [Tribolium castaneum]	52.82	5e-155
c10747_g1_i1	c10747_g1_i1|m.7788	6.2	gi|270014920|gb|EFA11368.1|hypothetical protein TcasGA2_TC011526 [Tribolium castaneum]	84.73	0
c10747_g1_i2	c10747_g1_i2|m.7790	6.22	gi|270014920|gb|EFA11368.1|hypothetical protein TcasGA2_TC011526 [Tribolium castaneum]	84.73	0
c10748_g1_i1	c10748_g1_i1|m.7792	20.86	gi|91088177|ref|XP_972343.1|PREDICTED: nuclear nucleic acid-binding protein C1D [Tribolium castaneum]	55.56	3e-48
c10749_g1_i1	c10749_g1_i1|m.7793	90.62	gi|270011535|gb|EFA07983.1|hypothetical protein TcasGA2_TC005565 [Tribolium castaneum]	51.01	4e-150
c10750_g1_i1	c10750_g1_i1|m.7794	14.9	gi|91091862|ref|XP_968876.1|PREDICTED: AP-3 complex subunit mu-1 [Tribolium castaneum]	91.33	0
c10751_g1_i1	c10751_g1_i1|m.7795	3.1	gi|642924029|ref|XP_008193977.1|PREDICTED: WD repeat-containing protein 37 isoform X3 [Tribolium castaneum]	72.58	0
c10751_g1_i2	c10751_g1_i2|m.7796	2.52	gi|642924029|ref|XP_008193977.1|PREDICTED: WD repeat-containing protein 37 isoform X3 [Tribolium castaneum]	72.58	0
c10752_g1_i1	c10752_g1_i1|m.7797	4.8	gi|795114998|ref|XP_011882999.1|PREDICTED: DNA ligase 1 isoform X6 [Vollenhovia emeryi]	68.66	0
c10754_g1_i1	c10754_g1_i1|m.7799	9.17	gi|91094999|ref|XP_969232.1|PREDICTED: UDP-glucuronic acid decarboxylase 1 isoform X2 [Tribolium castaneum]	77.87	0
c10756_g1_i1	c10756_g1_i1|m.7800	5.39	gi|270001869|gb|EEZ98316.1|hypothetical protein TcasGA2_TC000770 [Tribolium castaneum]	57.69	2e-49
c10756_g1_i2	c10756_g1_i2|m.7801	6.71	gi|270001869|gb|EEZ98316.1|hypothetical protein TcasGA2_TC000770 [Tribolium castaneum]	59.42	4e-76
c10757_g1_i1	c10757_g1_i1|m.7802	3.25	gi|91076220|ref|XP_972698.1|PREDICTED: solute carrier organic anion transporter family member 5A1 [Tribolium castaneum]	82.61	0
c10757_g1_i2	c10757_g1_i2|m.7804	3.51	gi|91076220|ref|XP_972698.1|PREDICTED: solute carrier organic anion transporter family member 5A1 [Tribolium castaneum]	82.61	0
c10759_g1_i1	c10759_g1_i1|m.7807	3.25	gi|270010575|gb|EFA07023.1|hypothetical protein TcasGA2_TC009994 [Tribolium castaneum]	75.44	2e-49
c10759_g1_i2	c10759_g1_i2|m.7808	4.64	gi|642929673|ref|XP_008195930.1|PREDICTED: DNA methyltransferase 1-associated protein 1 [Tribolium castaneum]	77.75	0
c10761_g2_i1	c10761_g2_i1|m.7810	4.43	gi|91089913|ref|XP_972686.1|PREDICTED: facilitated trehalose transporter Tret1 [Tribolium castaneum]	53.35	2e-160
c10761_g3_i1	c10761_g3_i1|m.7812	0.99	gi|91089913|ref|XP_972686.1|PREDICTED: facilitated trehalose transporter Tret1 [Tribolium castaneum]	52.38	4e-57
c10761_g3_i2	c10761_g3_i2|m.7814	1.63	gi|91089913|ref|XP_972686.1|PREDICTED: facilitated trehalose transporter Tret1 [Tribolium castaneum]	51.27	4e-149
c10762_g1_i1	c10762_g1_i1|m.7816	7.24	gi|642933937|ref|XP_008197573.1|PREDICTED: ADP-ribosylation factor-binding protein GGA3 isoform X1 [Tribolium castaneum]	59.25	0
c10764_g1_i1	c10764_g1_i1|m.7819	27.54	gi|910337307|ref|XP_013172218.1|PREDICTED: uncharacterized protein LOC106121222 [Papilio xuthus]	50	8e-64
c10765_g1_i1	c10765_g1_i1|m.7820	2.14	gi|752893169|ref|XP_011264711.1|PREDICTED: uncharacterized protein LOC105256480 isoform X2 [Camponotus floridanus]	54.97	6e-132
c10766_g1_i1	c10766_g1_i1|m.7822	6.07	gi|270004918|gb|EFA01366.1|hypothetical protein TcasGA2_TC010351 [Tribolium castaneum]	55.56	2e-40
c10767_g2_i1	c10767_g2_i1|m.7823	12.33	gi|642922575|ref|XP_008193233.1|PREDICTED: protein DDI1 homolog 2 isoform X3 [Tribolium castaneum]	76.26	0
c10769_g1_i1	c10769_g1_i1|m.7825	8.35	gi|642920032|ref|XP_008192175.1|PREDICTED: uncharacterized protein LOC103312676 [Tribolium castaneum]	64.94	2e-158
c1077_g1_i1	c1077_g1_i1|m.317	0.8	gi|270016151|gb|EFA12599.1|hypothetical protein TcasGA2_TC001839 [Tribolium castaneum]	50	4e-42
c10770_g1_i1	c10770_g1_i1|m.7826	24.72	gi|91083251|ref|XP_974045.1|PREDICTED: ATP-dependent RNA helicase WM6 [Tribolium castaneum]	96.71	5e-171
c10770_g1_i1	c10770_g1_i1|m.7827	24.72	gi|91083251|ref|XP_974045.1|PREDICTED: ATP-dependent RNA helicase WM6 [Tribolium castaneum]	98.34	4e-124
c10770_g1_i2	c10770_g1_i2|m.7828	27.62	gi|91083251|ref|XP_974045.1|PREDICTED: ATP-dependent RNA helicase WM6 [Tribolium castaneum]	96.71	5e-171
c10770_g1_i2	c10770_g1_i2|m.7829	27.62	gi|91083251|ref|XP_974045.1|PREDICTED: ATP-dependent RNA helicase WM6 [Tribolium castaneum]	98.34	4e-124
c10770_g1_i3	c10770_g1_i3|m.7830	37.3	gi|91083251|ref|XP_974045.1|PREDICTED: ATP-dependent RNA helicase WM6 [Tribolium castaneum]	97.41	0
c10771_g1_i1	c10771_g1_i1|m.7831	1.78	gi|642923760|ref|XP_008193873.1|PREDICTED: jmjC domain-containing protein 4 [Tribolium castaneum]	54.21	6e-71
c10771_g1_i1	c10771_g1_i1|m.7832	1.78	gi|909557616|ref|XP_013133782.1|PREDICTED: jmjC domain-containing protein 4 homolog isoform X2 [Papilio polytes]	51.79	7e-08
c10771_g1_i2	c10771_g1_i2|m.7833	1.08	gi|642923760|ref|XP_008193873.1|PREDICTED: jmjC domain-containing protein 4 [Tribolium castaneum]	54.69	2e-72
c10771_g1_i2	c10771_g1_i2|m.7834	1.08	gi|909557616|ref|XP_013133782.1|PREDICTED: jmjC domain-containing protein 4 homolog isoform X2 [Papilio polytes]	53.19	1e-06
c10773_g1_i1	c10773_g1_i1|m.7836	41.5	gi|91084671|ref|XP_966504.1|PREDICTED: lambda-crystallin [Tribolium castaneum]	76.38	1e-177
c10774_g1_i1	c10774_g1_i1|m.7837	11.14	gi|91092328|ref|XP_970407.1|PREDICTED: probable 28S ribosomal protein S6, mitochondrial [Tribolium castaneum]	70.75	1e-70
c10776_g1_i1	c10776_g1_i1|m.7840	13.6	gi|817063896|ref|XP_012253669.1|PREDICTED: peptidylglycine alpha-hydroxylating monooxygenase [Athalia rosae]	63.8	1e-153
c10778_g1_i1	c10778_g1_i1|m.7842	52.57	gi|91090952|ref|XP_974552.1|PREDICTED: probable rRNA-processing protein EBP2 homolog [Tribolium castaneum]	65.29	1e-115
c10780_g1_i1	c10780_g1_i1|m.7844	11.52	gi|662187739|ref|XP_008487512.1|PREDICTED: iodotyrosine dehalogenase 1 [Diaphorina citri]	54.55	3e-70
c10780_g1_i2	c10780_g1_i2|m.7845	7.32	gi|662187739|ref|XP_008487512.1|PREDICTED: iodotyrosine dehalogenase 1 [Diaphorina citri]	54.55	3e-70
c10782_g1_i1	c10782_g1_i1|m.7847	1.08	gi|642927006|ref|XP_008195101.1|PREDICTED: protein disabled isoform X4 [Tribolium castaneum]	51.03	0
c10783_g1_i1	c10783_g1_i1|m.7853	15.22	gi|817063822|ref|XP_012253629.1|PREDICTED: etoposide-induced protein 2.4 homolog [Athalia rosae]	60.31	6e-141
c10784_g1_i1	c10784_g1_i1|m.7854	1397.31	gi|902930683|ref|XP_013053438.1|PREDICTED: neurobeachin-like protein 2 [Anser cygnoides domesticus]	50	2e-10
c10785_g1_i1	c10785_g1_i1|m.7855	9.81	gi|383861037|ref|XP_003705993.1|PREDICTED: RWD domain-containing protein 1 [Megachile rotundata]	60.75	5e-83
c10785_g1_i2	c10785_g1_i2|m.7856	10.35	gi|332376408|gb|AEE63344.1|unknown [Dendroctonus ponderosae]	62.76	1e-83
c10786_g1_i1	c10786_g1_i1|m.7857	2.95	gi|91084727|ref|XP_970450.1|PREDICTED: uncharacterized protein LOC659018 [Tribolium castaneum]	51.93	1e-171
c10787_g1_i1	c10787_g1_i1|m.7859	18.76	gi|642932951|ref|XP_008197201.1|PREDICTED: sodium-independent sulfate anion transporter isoform X1 [Tribolium castaneum]	68.2	0
c10789_g1_i1	c10789_g1_i1|m.7862	14.6	gi|478255459|gb|ENN75680.1|hypothetical protein YQE_07778, partial [Dendroctonus ponderosae]	56.68	1e-93
c1079_g1_i1	c1079_g1_i1|m.319	2.61	gi|642929518|ref|XP_008195870.1|PREDICTED: ubiquitin carboxyl-terminal hydrolase calypso [Tribolium castaneum]	71.65	0
c10791_g1_i1	c10791_g1_i1|m.7864	59.19	gi|646714093|gb|KDR18186.1|Serine/threonine-protein phosphatase 2A catalytic subunit alpha isoform [Zootermopsis nevadensis]	98.38	0
c10794_g1_i1	c10794_g1_i1|m.7866	3.46	gi|642937356|ref|XP_008198803.1|PREDICTED: raf homolog serine/threonine-protein kinase phl [Tribolium castaneum]	80.42	0
c10798_g1_i1	c10798_g1_i1|m.7871	7.41	gi|91078182|ref|XP_967647.1|PREDICTED: beta-galactosidase-1-like protein 2 [Tribolium castaneum]	63.4	0
c10800_g1_i1	c10800_g1_i1|m.7872	555.08	gi|642935120|ref|XP_008197896.1|PREDICTED: vigilin [Tribolium castaneum]	76.94	0
c10801_g1_i1	c10801_g1_i1|m.7874	6.21	gi|642928504|ref|XP_008193818.1|PREDICTED: endoplasmic reticulum metallopeptidase 1-like isoform X1 [Tribolium castaneum]	63.33	0
c10802_g1_i1	c10802_g1_i1|m.7875	4.14	gi|189239014|ref|XP_974755.2|PREDICTED: CCR4-NOT transcription complex subunit 11 [Tribolium castaneum]	77.34	0
c10803_g1_i1	c10803_g1_i1|m.7876	9.18	gi|642912199|ref|XP_008200849.1|PREDICTED: delta-1-pyrroline-5-carboxylate synthase [Tribolium castaneum]	77.71	0
c10805_g1_i1	c10805_g1_i1|m.7878	4.14	gi|91079262|ref|XP_972008.1|PREDICTED: ubiquitin carboxyl-terminal hydrolase 35 [Tribolium castaneum]	52.45	3e-129
c10805_g1_i2	c10805_g1_i2|m.7879	6.9	gi|91079262|ref|XP_972008.1|PREDICTED: ubiquitin carboxyl-terminal hydrolase 35 [Tribolium castaneum]	57.21	0
c10806_g1_i1	c10806_g1_i1|m.7880	6.75	gi|642914303|ref|XP_001815546.2|PREDICTED: mediator of RNA polymerase II transcription subunit 28 isoform X2 [Tribolium castaneum]	83.82	9e-97
c10806_g1_i2	c10806_g1_i2|m.7881	4.54	gi|642914301|ref|XP_008201628.1|PREDICTED: mediator of RNA polymerase II transcription subunit 28 isoform X1 [Tribolium castaneum]	81.52	2e-121
c10807_g1_i1	c10807_g1_i1|m.7882	4.88	gi|642929363|ref|XP_008195804.1|PREDICTED: iron-sulfur cluster assembly 2 homolog, mitochondrial [Tribolium castaneum]	72.36	7e-61
c10809_g1_i1	c10809_g1_i1|m.7884	13.45	gi|642917196|ref|XP_008191158.1|PREDICTED: protein IMPACT-like [Tribolium castaneum]	58.89	3e-102
c1081_g1_i1	c1081_g1_i1|m.320	0.47	gi|642922990|ref|XP_008200484.1|PREDICTED: retinal guanylyl cyclase 2-like [Tribolium castaneum]	69.11	1e-40
c1081_g1_i2	c1081_g1_i2|m.321	0.89	gi|642922990|ref|XP_008200484.1|PREDICTED: retinal guanylyl cyclase 2-like [Tribolium castaneum]	66.87	3e-56
c10810_g1_i1	c10810_g1_i1|m.7885	12.52	gi|91080473|ref|XP_970438.1|PREDICTED: mitochondrial inner membrane protease subunit 1 [Tribolium castaneum]	61.97	4e-65
c10811_g1_i1	c10811_g1_i1|m.7886	33.32	gi|189233641|ref|XP_001814986.1|PREDICTED: nicotinate phosphoribosyltransferase isoform X1 [Tribolium castaneum]	75.27	0
c10812_g1_i1	c10812_g1_i1|m.7887	44.57	gi|91084817|ref|XP_973265.1|PREDICTED: ribosome biogenesis protein BOP1 homolog [Tribolium castaneum]	76.09	0
c10815_g1_i1	c10815_g1_i1|m.7889	7.18	gi|332374592|gb|AEE62437.1|unknown [Dendroctonus ponderosae]	56.8	7e-66
c10816_g1_i1	c10816_g1_i1|m.7890	39.8	gi|646714771|gb|KDR18625.1|Flotillin-1 [Zootermopsis nevadensis]	76.94	0
c10817_g1_i1	c10817_g1_i1|m.7892	3.95	gi|270007804|gb|EFA04252.1|hypothetical protein TcasGA2_TC014542 [Tribolium castaneum]	81.49	0
c10817_g1_i2	c10817_g1_i2|m.7893	4.09	gi|270007804|gb|EFA04252.1|hypothetical protein TcasGA2_TC014542 [Tribolium castaneum]	80.78	0
c10818_g1_i1	c10818_g1_i1|m.7894	85.8	gi|91077054|ref|XP_966585.1|PREDICTED: probable transaldolase [Tribolium castaneum]	74.7	0
c10819_g1_i1	c10819_g1_i1|m.7895	10.52	gi|91081707|ref|XP_971145.1|PREDICTED: lysophospholipase-like protein 1 [Tribolium castaneum]	56.95	6e-88
c10821_g1_i1	c10821_g1_i1|m.7897	215.74	gi|299758408|ref|NP_001177648.1|eukaryotic initiation factor 4a [Tribolium castaneum]	92.34	0
c10821_g1_i2	c10821_g1_i2|m.7899	157.38	gi|299758408|ref|NP_001177648.1|eukaryotic initiation factor 4a [Tribolium castaneum]	92.34	0
c10822_g1_i1	c10822_g1_i1|m.7901	13.3	gi|189241511|ref|XP_967615.2|PREDICTED: U3 small nucleolar ribonucleoprotein protein IMP3 [Tribolium castaneum]	80.66	2e-104
c10823_g1_i1	c10823_g1_i1|m.7902	5.9	gi|91087937|ref|XP_971924.1|PREDICTED: alpha-ketoglutarate-dependent dioxygenase alkB homolog 4 [Tribolium castaneum]	65.16	5e-136
c10825_g1_i1	c10825_g1_i1|m.7907	2.23	gi|91084477|ref|XP_971283.1|PREDICTED: uncharacterized protein LOC659924 [Tribolium castaneum]	55.89	0
c10826_g1_i4	c10826_g1_i4|m.7909	7.12	gi|642917757|ref|XP_008191356.1|PREDICTED: uncharacterized protein LOC100141567 isoform X1 [Tribolium castaneum]	69.47	3e-128
c10826_g1_i5	c10826_g1_i5|m.7910	5.71	gi|642917762|ref|XP_008191358.1|PREDICTED: uncharacterized protein LOC100141567 isoform X3 [Tribolium castaneum]	71.32	2e-41
c10826_g1_i6	c10826_g1_i6|m.7911	8.68	gi|642917762|ref|XP_008191358.1|PREDICTED: uncharacterized protein LOC100141567 isoform X3 [Tribolium castaneum]	68.39	2e-49
c10828_g1_i1	c10828_g1_i1|m.7912	2.45	gi|642929988|ref|XP_008196055.1|PREDICTED: patj homolog [Tribolium castaneum]	72.18	0
c10829_g2_i1	c10829_g2_i1|m.7913	0.26	gi|332019100|gb|EGI59628.1|hypothetical protein G5I_12220 [Acromyrmex echinatior]	55.77	7e-06
c10829_g2_i2	c10829_g2_i2|m.7914	0.37	gi|332019100|gb|EGI59628.1|hypothetical protein G5I_12220 [Acromyrmex echinatior]	55.77	6e-06
c10830_g1_i1	c10830_g1_i1|m.7915	20.44	gi|91089165|ref|XP_973951.1|PREDICTED: H/ACA ribonucleoprotein complex non-core subunit NAF1 [Tribolium castaneum]	55.83	5e-65
c10831_g1_i1	c10831_g1_i1|m.7916	3.75	gi|646717298|gb|KDR20207.1|WD repeat domain phosphoinositide-interacting protein 4 [Zootermopsis nevadensis]	72.83	0
c10831_g1_i2	c10831_g1_i2|m.7918	2.37	gi|646717298|gb|KDR20207.1|WD repeat domain phosphoinositide-interacting protein 4 [Zootermopsis nevadensis]	71.91	3e-124
c10832_g1_i2	c10832_g1_i2|m.7920	38.01	gi|642916366|ref|XP_008190991.1|PREDICTED: enoyl-CoA delta isomerase 1, mitochondrial-like [Tribolium castaneum]	57.14	2e-113
c10833_g1_i1	c10833_g1_i1|m.7922	7	gi|831273063|ref|XP_012677862.1|PREDICTED: HEAT repeat-containing protein 1 [Clupea harengus]	52.58	4e-15
c10835_g1_i1	c10835_g1_i1|m.7924	167.42	gi|642937316|ref|XP_008198784.1|PREDICTED: S-adenosylmethionine synthase isoform X2 [Tribolium castaneum]	89.6	0
c10837_g2_i1	c10837_g2_i1|m.7927	2.36	gi|642927029|ref|XP_008195110.1|PREDICTED: CREB-regulated transcription coactivator 1-like isoform X4 [Tribolium castaneum]	65.94	0
c10837_g2_i2	c10837_g2_i2|m.7928	2.2	gi|642927029|ref|XP_008195110.1|PREDICTED: CREB-regulated transcription coactivator 1-like isoform X4 [Tribolium castaneum]	60.36	5e-74
c10838_g1_i1	c10838_g1_i1|m.7930	8.86	gi|91091348|ref|XP_972245.1|PREDICTED: solute carrier family 25 member 35 [Tribolium castaneum]	61.2	2e-135
c10838_g1_i2	c10838_g1_i2|m.7931	5.55	gi|91091348|ref|XP_972245.1|PREDICTED: solute carrier family 25 member 35 [Tribolium castaneum]	59.26	1e-64
c10841_g1_i1	c10841_g1_i1|m.7933	13.05	gi|91082175|ref|XP_971023.1|PREDICTED: trafficking protein particle complex subunit 3 [Tribolium castaneum]	85.39	9e-112
c10842_g1_i1	c10842_g1_i1|m.7934	1.26	gi|642917862|ref|XP_008191318.1|PREDICTED: protein dopey-1 homolog [Tribolium castaneum]	63.1	0
c10842_g1_i2	c10842_g1_i2|m.7935	1.53	gi|642917862|ref|XP_008191318.1|PREDICTED: protein dopey-1 homolog [Tribolium castaneum]	63.91	0
c10842_g1_i3	c10842_g1_i3|m.7936	1.74	gi|642917862|ref|XP_008191318.1|PREDICTED: protein dopey-1 homolog [Tribolium castaneum]	63.97	0
c10842_g1_i4	c10842_g1_i4|m.7937	0.87	gi|642917862|ref|XP_008191318.1|PREDICTED: protein dopey-1 homolog [Tribolium castaneum]	63.88	0
c10843_g1_i1	c10843_g1_i1|m.7938	1.4	gi|189238650|ref|XP_971917.2|PREDICTED: scavenger receptor class B member 1 isoform X2 [Tribolium castaneum]	69.31	0
c10843_g1_i2	c10843_g1_i2|m.7940	1.56	gi|189238650|ref|XP_971917.2|PREDICTED: scavenger receptor class B member 1 isoform X2 [Tribolium castaneum]	69.31	0
c10844_g1_i1	c10844_g1_i1|m.7941	2.72	gi|913320509|ref|XP_013191375.1|PREDICTED: MIT domain-containing protein 1-like [Amyelois transitella]	58.12	1e-93
c10844_g1_i2	c10844_g1_i2|m.7942	2.22	gi|913320509|ref|XP_013191375.1|PREDICTED: MIT domain-containing protein 1-like [Amyelois transitella]	55.32	2e-65
c10845_g1_i1	c10845_g1_i1|m.7943	132.58	gi|546671844|gb|ERL83980.1|hypothetical protein D910_01296, partial [Dendroctonus ponderosae]	51.85	2e-08
c10846_g1_i1	c10846_g1_i1|m.7944	319.63	gi|91088787|ref|XP_967840.1|PREDICTED: uncharacterized protein C12orf31 homolog [Tribolium castaneum]	51.35	2e-27
c10847_g1_i1	c10847_g1_i1|m.7945	2.21	gi|642921236|ref|XP_008192775.1|PREDICTED: apoptosis-stimulating of p53 protein 1 isoform X4 [Tribolium castaneum]	64.75	0
c10847_g1_i1	c10847_g1_i1|m.7946	2.21	gi|642921236|ref|XP_008192775.1|PREDICTED: apoptosis-stimulating of p53 protein 1 isoform X4 [Tribolium castaneum]	72.03	1e-175
c10848_g1_i1	c10848_g1_i1|m.7948	23.31	gi|91089517|ref|XP_970614.1|PREDICTED: thioredoxin domain-containing protein 9 [Tribolium castaneum]	53.7	1e-88
c10849_g1_i1	c10849_g1_i1|m.7949	42.17	gi|270005783|gb|EFA02231.1|hypothetical protein TcasGA2_TC007893 [Tribolium castaneum]	61.17	0
c10850_g1_i1	c10850_g1_i1|m.7950	0.88	gi|270003193|gb|EEZ99640.1|hypothetical protein TcasGA2_TC002396 [Tribolium castaneum]	58.17	2e-104
c10850_g1_i1	c10850_g1_i1|m.7951	0.88	gi|478257432|gb|ENN77588.1|hypothetical protein YQE_05883, partial [Dendroctonus ponderosae]	50.6	1e-43
c10850_g1_i2	c10850_g1_i2|m.7952	0.83	gi|270003193|gb|EEZ99640.1|hypothetical protein TcasGA2_TC002396 [Tribolium castaneum]	60.51	1e-132
c10850_g1_i2	c10850_g1_i2|m.7953	0.83	gi|478257432|gb|ENN77588.1|hypothetical protein YQE_05883, partial [Dendroctonus ponderosae]	50.6	1e-43
c10850_g1_i3	c10850_g1_i3|m.7954	1.35	gi|642918646|ref|XP_008200444.1|PREDICTED: uncharacterized aarF domain-containing protein kinase 5 [Tribolium castaneum]	55.86	0
c10851_g1_i1	c10851_g1_i1|m.7955	7.87	gi|642923040|ref|XP_973485.2|PREDICTED: transmembrane protein 164 [Tribolium castaneum]	74.48	3e-148
c10851_g1_i2	c10851_g1_i2|m.7956	8.92	gi|642923040|ref|XP_973485.2|PREDICTED: transmembrane protein 164 [Tribolium castaneum]	74.48	3e-148
c10852_g1_i1	c10852_g1_i1|m.7957	59.82	gi|642918239|ref|XP_008191425.1|PREDICTED: protein enabled isoform X2 [Tribolium castaneum]	76.87	2e-118
c10852_g2_i1	c10852_g2_i1|m.7959	13.45	gi|642918239|ref|XP_008191425.1|PREDICTED: protein enabled isoform X2 [Tribolium castaneum]	92	8e-78
c10852_g2_i2	c10852_g2_i2|m.7960	8.65	gi|91079832|ref|XP_970236.1|PREDICTED: protein enabled isoform X1 [Tribolium castaneum]	82.17	3e-89
c10855_g1_i1	c10855_g1_i1|m.7964	3.3	gi|646716815|gb|KDR19901.1|Ubiquitin-conjugating enzyme E2 Z [Zootermopsis nevadensis]	66.9	1e-67
c10855_g1_i2	c10855_g1_i2|m.7965	7.91	gi|646716815|gb|KDR19901.1|Ubiquitin-conjugating enzyme E2 Z [Zootermopsis nevadensis]	61.38	1e-108
c10856_g1_i2	c10856_g1_i2|m.7966	20.72	gi|752887810|ref|XP_011261795.1|PREDICTED: tyrosine aminotransferase [Camponotus floridanus]	58.82	1e-57
c10857_g1_i1	c10857_g1_i1|m.7967	12.52	gi|91087949|ref|XP_972541.1|PREDICTED: rhomboid-related protein 2 [Tribolium castaneum]	64.79	8e-169
c10858_g1_i1	c10858_g1_i1|m.7968	5.49	gi|642924477|ref|XP_008194313.1|PREDICTED: insulin-like growth factor-binding protein complex acid labile subunit [Tribolium castaneum]	81.39	0
c10859_g1_i1	c10859_g1_i1|m.7969	50.73	gi|237820629|ref|NP_001153782.1|transmembrane protein 120B [Tribolium castaneum]	76.11	0
c10860_g1_i1	c10860_g1_i1|m.7970	5.95	gi|91078790|ref|XP_969765.1|PREDICTED: retinoblastoma-binding protein 5 [Tribolium castaneum]	83.51	0
c10861_g1_i1	c10861_g1_i1|m.7971	3.95	gi|91089485|ref|XP_969495.1|PREDICTED: matrix metalloproteinase-14 [Tribolium castaneum]	51.68	5e-132
c10863_g1_i1	c10863_g1_i1|m.7975	42.05	gi|565341567|gb|AHC08063.1|zeta glutathione S-transferase [Locusta migratoria]	91.71	7e-144
c10864_g1_i1	c10864_g1_i1|m.7976	2.3	gi|91082929|ref|XP_972879.1|PREDICTED: ubiquitin-conjugating enzyme E2Q-like protein CG4502 [Tribolium castaneum]	81.6	2e-146
c10865_g1_i1	c10865_g1_i1|m.7977	4.64	gi|642910779|ref|XP_008193406.1|PREDICTED: membrane-associated guanylate kinase, WW and PDZ domain-containing protein 1 [Tribolium castaneum]	70.62	0
c10866_g1_i1	c10866_g1_i1|m.7981	3.43	gi|91081049|ref|XP_976170.1|PREDICTED: uncharacterized protein LOC664274 [Tribolium castaneum]	59.48	9e-62
c10866_g1_i2	c10866_g1_i2|m.7982	2.39	gi|91081049|ref|XP_976170.1|PREDICTED: uncharacterized protein LOC664274 [Tribolium castaneum]	59.48	9e-62
c10867_g1_i1	c10867_g1_i1|m.7983	1.96	gi|189239328|ref|XP_973240.2|PREDICTED: ribosome-releasing factor 2, mitochondrial [Tribolium castaneum]	61.41	0
c10868_g1_i1	c10868_g1_i1|m.7985	39.62	gi|91092056|ref|XP_970271.1|PREDICTED: dihydropyrimidine dehydrogenase [NADP(+)] isoform X2 [Tribolium castaneum]	74.93	0
c10871_g1_i1	c10871_g1_i1|m.7988	12.27	gi|91080193|ref|XP_971209.1|PREDICTED: 39S ribosomal protein L17, mitochondrial [Tribolium castaneum]	80.49	6e-90
c10872_g2_i1	c10872_g2_i1|m.7989	3.62	gi|91092690|ref|XP_971771.1|PREDICTED: myocyte-specific enhancer factor 2 isoform X2 [Tribolium castaneum]	83.53	0
c10872_g2_i2	c10872_g2_i2|m.7990	4.23	gi|91092690|ref|XP_971771.1|PREDICTED: myocyte-specific enhancer factor 2 isoform X2 [Tribolium castaneum]	85.75	0
c10872_g2_i3	c10872_g2_i3|m.7991	4.2	gi|91092690|ref|XP_971771.1|PREDICTED: myocyte-specific enhancer factor 2 isoform X2 [Tribolium castaneum]	86.54	0
c10872_g2_i4	c10872_g2_i4|m.7992	4.14	gi|91092690|ref|XP_971771.1|PREDICTED: myocyte-specific enhancer factor 2 isoform X2 [Tribolium castaneum]	83.53	0
c10872_g2_i5	c10872_g2_i5|m.7993	4.28	gi|91092690|ref|XP_971771.1|PREDICTED: myocyte-specific enhancer factor 2 isoform X2 [Tribolium castaneum]	83.53	0
c10872_g2_i6	c10872_g2_i6|m.7994	5.14	gi|642911378|ref|XP_008199399.1|PREDICTED: myocyte-specific enhancer factor 2 isoform X1 [Tribolium castaneum]	83.68	0
c10872_g2_i7	c10872_g2_i7|m.7995	4.09	gi|91092690|ref|XP_971771.1|PREDICTED: myocyte-specific enhancer factor 2 isoform X2 [Tribolium castaneum]	83.53	0
c10873_g1_i1	c10873_g1_i1|m.7996	23.44	gi|91087023|ref|XP_974255.1|PREDICTED: ethanolaminephosphotransferase 1-like [Tribolium castaneum]	63.4	0
c10874_g1_i1	c10874_g1_i1|m.7997	5.05	gi|91085575|ref|XP_968070.1|PREDICTED: glutathione synthetase-like isoform X2 [Tribolium castaneum]	64.94	0
c10874_g1_i2	c10874_g1_i2|m.7998	6.12	gi|91085575|ref|XP_968070.1|PREDICTED: glutathione synthetase-like isoform X2 [Tribolium castaneum]	72.57	1e-155
c10874_g1_i2	c10874_g1_i2|m.7999	6.12	gi|91085575|ref|XP_968070.1|PREDICTED: glutathione synthetase-like isoform X2 [Tribolium castaneum]	59.78	1e-70
c10875_g1_i1	c10875_g1_i1|m.8000	2.54	gi|642938177|ref|XP_008191025.1|PREDICTED: G-protein coupled receptor Mth2-like isoform X7 [Tribolium castaneum]	53.35	2e-102
c10876_g1_i1	c10876_g1_i1|m.8002	6.91	gi|91095011|ref|XP_969955.1|PREDICTED: transcription initiation factor TFIID subunit 9 [Tribolium castaneum]	61.09	6e-88
c10877_g1_i1	c10877_g1_i1|m.8003	1.41	gi|642935459|ref|XP_972294.2|PREDICTED: uncharacterized protein LOC661011 isoform X2 [Tribolium castaneum]	53.46	5e-77
c10877_g1_i2	c10877_g1_i2|m.8005	1.31	gi|817071692|ref|XP_012257923.1|PREDICTED: HMG box-containing protein 4 isoform X1 [Athalia rosae]	53.66	3e-112
c10877_g1_i3	c10877_g1_i3|m.8007	1.26	gi|642935461|ref|XP_008198019.1|PREDICTED: uncharacterized protein LOC661011 isoform X3 [Tribolium castaneum]	54.15	6e-51
c10878_g1_i1	c10878_g1_i1|m.8009	0.66	gi|642933178|ref|XP_008197290.1|PREDICTED: G protein-activated inward rectifier potassium channel 3-like isoform X2 [Tribolium castaneum]	73.02	0
c10878_g1_i2	c10878_g1_i2|m.8010	0.54	gi|642933178|ref|XP_008197290.1|PREDICTED: G protein-activated inward rectifier potassium channel 3-like isoform X2 [Tribolium castaneum]	80.71	0
c10878_g1_i3	c10878_g1_i3|m.8011	0.52	gi|642933178|ref|XP_008197290.1|PREDICTED: G protein-activated inward rectifier potassium channel 3-like isoform X2 [Tribolium castaneum]	87.79	0
c10879_g2_i1	c10879_g2_i1|m.8012	1.99	gi|642936951|ref|XP_008198626.1|PREDICTED: protein ENL [Tribolium castaneum]	54.05	3e-71
c10880_g1_i1	c10880_g1_i1|m.8013	2.43	gi|478257007|gb|ENN77171.1|hypothetical protein YQE_06309, partial [Dendroctonus ponderosae]	85.25	8e-71
c10880_g1_i2	c10880_g1_i2|m.8014	6.45	gi|91082507|ref|XP_973065.1|PREDICTED: protein kinase DC2 [Tribolium castaneum]	83.95	0
c10881_g1_i1	c10881_g1_i1|m.8015	17.68	gi|91084689|ref|XP_968899.1|PREDICTED: Golgi SNAP receptor complex member 1 [Tribolium castaneum]	72.81	3e-118
c10882_g1_i1	c10882_g1_i1|m.8016	66.21	gi|642938021|ref|XP_008199174.1|PREDICTED: alpha-aminoadipic semialdehyde synthase, mitochondrial isoform X1 [Tribolium castaneum]	77.31	0
c10883_g1_i1	c10883_g1_i1|m.8017	26.91	gi|546675896|gb|ERL87001.1|hypothetical protein D910_04404 [Dendroctonus ponderosae]	72.56	4e-106
c10884_g1_i1	c10884_g1_i1|m.8018	43.27	gi|91090900|ref|XP_973581.1|PREDICTED: peroxisomal membrane protein PMP22 [Tribolium castaneum]	62.7	4e-82
c10885_g1_i1	c10885_g1_i1|m.8019	7.11	gi|332376529|gb|AEE63404.1|unknown [Dendroctonus ponderosae]	83.89	0
c10886_g1_i1	c10886_g1_i1|m.8020	24.9	gi|478262410|gb|ENN81081.1|hypothetical protein YQE_02450, partial [Dendroctonus ponderosae]	73.73	0
c10888_g1_i1	c10888_g1_i1|m.8024	4.56	gi|332376234|gb|AEE63257.1|unknown [Dendroctonus ponderosae]	54.67	4e-138
c10889_g1_i1	c10889_g1_i1|m.8025	1.64	gi|91083541|ref|XP_966421.1|PREDICTED: guanine nucleotide-binding protein G(o) subunit alpha isoform X1 [Tribolium castaneum]	96.89	0
c10889_g1_i2	c10889_g1_i2|m.8026	2.05	gi|91083543|ref|XP_975838.1|PREDICTED: guanine nucleotide-binding protein G(o) subunit alpha isoform X2 [Tribolium castaneum]	99.15	0
c10890_g1_i1	c10890_g1_i1|m.8027	134.7	gi|189240813|ref|XP_001811587.1|PREDICTED: 4-aminobutyrate aminotransferase, mitochondrial-like [Tribolium castaneum]	67.21	0
c10893_g1_i1	c10893_g1_i1|m.8029	53.5	gi|642912959|ref|XP_008201326.1|PREDICTED: programmed cell death 6-interacting protein [Tribolium castaneum]	72.03	0
c10895_g1_i1	c10895_g1_i1|m.8031	2.03	gi|190360719|ref|NP_001121967.1|knirps [Tribolium castaneum]	76.11	1e-96
c10895_g2_i1	c10895_g2_i1|m.8032	5.23	gi|642917978|ref|XP_008198968.1|PREDICTED: mediator of RNA polymerase II transcription subunit 29 [Tribolium castaneum]	81.16	3e-78
c10896_g1_i1	c10896_g1_i1|m.8033	4.74	gi|642918892|ref|XP_973654.2|PREDICTED: WASH complex subunit CCDC53 homolog [Tribolium castaneum]	54.9	3e-46
c10896_g1_i1	c10896_g1_i1|m.8034	4.74	gi|546676032|gb|ERL87119.1|hypothetical protein D910_04519, partial [Dendroctonus ponderosae]	50.89	3e-34
c10896_g1_i2	c10896_g1_i2|m.8035	5.57	gi|820859330|ref|XP_012346604.1|PREDICTED: tudor domain-containing protein 3 isoform X1 [Apis florea]	59.38	2e-17
c10896_g1_i2	c10896_g1_i2|m.8036	5.57	gi|642918892|ref|XP_973654.2|PREDICTED: WASH complex subunit CCDC53 homolog [Tribolium castaneum]	54.9	3e-46
c10897_g1_i1	c10897_g1_i1|m.8037	4.35	gi|642920336|ref|XP_008192303.1|PREDICTED: zinc finger CCCH domain-containing protein 14 isoform X1 [Tribolium castaneum]	51.13	0
c10898_g1_i1	c10898_g1_i1|m.8038	13.44	gi|642934609|ref|XP_008197736.1|PREDICTED: corepressor interacting with RBPJ 1 [Tribolium castaneum]	78.93	4e-133
c10899_g1_i1	c10899_g1_i1|m.8039	7.65	gi|242020796|ref|XP_002430837.1|conserved hypothetical protein [Pediculus humanus corporis]	70.67	8e-103
c109_g2_i1	c109_g2_i1|m.36	2.48	gi|642911684|ref|XP_008200700.1|PREDICTED: prohormone-4 [Tribolium castaneum]	93.63	2e-130
c1090_g1_i1	c1090_g1_i1|m.324	2.79	gi|47605414|sp|Q7M4F4.1|CUD1_SCHGRRecName: Full=Endocuticle structural glycoprotein SgAbd-1 [Schistocerca gregaria]	54.63	2e-29
c10900_g1_i1	c10900_g1_i1|m.8040	160.62	gi|91088191|ref|XP_972764.1|PREDICTED: ribonuclease UK114 [Tribolium castaneum]	66.18	4e-57
c10901_g1_i1	c10901_g1_i1|m.8041	12.1	gi|91091780|ref|XP_969605.1|PREDICTED: ubiquitin thioesterase OTU1 [Tribolium castaneum]	65.48	4e-146
c10903_g1_i1	c10903_g1_i1|m.8045	48.23	gi|157132770|ref|XP_001662636.1|AAEL012522-PA [Aedes aegypti]	57.98	0
c10903_g1_i2	c10903_g1_i2|m.8046	53.62	gi|157132770|ref|XP_001662636.1|AAEL012522-PA [Aedes aegypti]	57.98	0
c10904_g1_i1	c10904_g1_i1|m.8047	8.59	gi|189237921|ref|XP_001811995.1|PREDICTED: sperm-associated antigen 7 [Tribolium castaneum]	73.06	3e-118
c10905_g1_i1	c10905_g1_i1|m.8048	6.33	gi|642913655|ref|XP_008201106.1|PREDICTED: nuclear cap-binding protein subunit 1 [Tribolium castaneum]	88.32	0
c10905_g1_i1	c10905_g1_i1|m.8049	6.33	gi|270001697|gb|EEZ98144.1|hypothetical protein TcasGA2_TC000569 [Tribolium castaneum]	75.47	4e-51
c10906_g1_i1	c10906_g1_i1|m.8050	1.49	gi|910311198|ref|XP_013162728.1|PREDICTED: gastrula zinc finger protein XlCGF57.1-like [Papilio xuthus]	52.1	4e-25
c10907_g1_i1	c10907_g1_i1|m.8051	35.56	gi|646718959|gb|KDR21247.1|hypothetical protein L798_04038 [Zootermopsis nevadensis]	62.94	1e-51
c10908_g1_i1	c10908_g1_i1|m.8052	16.83	gi|642913392|ref|XP_008195512.1|PREDICTED: methylmalonic aciduria and homocystinuria type D homolog, mitochondrial-like [Tribolium castaneum]	55.17	9e-97
c10909_g1_i1	c10909_g1_i1|m.8053	1.7	gi|642925217|ref|XP_008194472.1|PREDICTED: zinc finger protein 729-like isoform X1 [Tribolium castaneum]	65.6	0
c10909_g2_i1	c10909_g2_i1|m.8055	1.64	gi|642925219|ref|XP_008194473.1|PREDICTED: zinc finger protein 91-like isoform X2 [Tribolium castaneum]	53.54	0
c10910_g1_i1	c10910_g1_i1|m.8056	25.53	gi|646709057|gb|KDR15105.1|Ras-related protein Rab-14 [Zootermopsis nevadensis]	95.35	6e-154
c10912_g1_i1	c10912_g1_i1|m.8057	5129.9	gi|765338755|ref|XP_011493435.1|AAEL017096-PA [Aedes aegypti]	94.81	0
c10913_g1_i1	c10913_g1_i1|m.8059	194.66	gi|91091742|ref|XP_966408.1|PREDICTED: alanine--glyoxylate aminotransferase 2-like [Tribolium castaneum]	70.91	0
c10914_g1_i1	c10914_g1_i1|m.8060	1.17	gi|642916650|ref|XP_008192038.1|PREDICTED: uncharacterized protein LOC103312652 [Tribolium castaneum]	51.88	0
c10914_g1_i2	c10914_g1_i2|m.8061	0.74	gi|642916650|ref|XP_008192038.1|PREDICTED: uncharacterized protein LOC103312652 [Tribolium castaneum]	54.94	5e-106
c10915_g1_i1	c10915_g1_i1|m.8062	6.48	gi|642915648|ref|XP_008190695.1|PREDICTED: uncharacterized protein LOC103312267 [Tribolium castaneum]	56.13	0
c10915_g1_i2	c10915_g1_i2|m.8063	5.26	gi|642915648|ref|XP_008190695.1|PREDICTED: uncharacterized protein LOC103312267 [Tribolium castaneum]	71.76	2e-153
c10916_g1_i1	c10916_g1_i1|m.8065	5.48	gi|642917992|ref|XP_008198973.1|PREDICTED: nuclear envelope phosphatase-regulatory subunit 1-like isoform X2 [Tribolium castaneum]	82.68	6e-73
c10916_g1_i2	c10916_g1_i2|m.8066	3.24	gi|642917990|ref|XP_008198972.1|PREDICTED: nuclear envelope phosphatase-regulatory subunit 1-like isoform X1 [Tribolium castaneum]	81.68	2e-74
c10916_g1_i3	c10916_g1_i3|m.8067	3.73	gi|642917992|ref|XP_008198973.1|PREDICTED: nuclear envelope phosphatase-regulatory subunit 1-like isoform X2 [Tribolium castaneum]	82.68	6e-73
c10916_g1_i4	c10916_g1_i4|m.8068	4.55	gi|642917990|ref|XP_008198972.1|PREDICTED: nuclear envelope phosphatase-regulatory subunit 1-like isoform X1 [Tribolium castaneum]	81.68	2e-74
c10917_g2_i1	c10917_g2_i1|m.8070	1.31	gi|260823140|ref|XP_002604041.1|hypothetical protein BRAFLDRAFT_71669 [Branchiostoma floridae]	50	3e-10
c10918_g1_i1	c10918_g1_i1|m.8074	101.53	gi|766941049|ref|XP_011503147.1|PREDICTED: renin receptor [Ceratosolen solmsi marchali]	69.49	1e-17
c10921_g1_i1	c10921_g1_i1|m.8079	3.88	gi|642923162|ref|XP_968605.2|PREDICTED: O-glucosyltransferase rumi homolog [Tribolium castaneum]	68.59	0
c10922_g1_i1	c10922_g1_i1|m.8080	1.66	gi|642929667|ref|XP_008195928.1|PREDICTED: probable Rho GTPase-activating protein CG5521 isoform X1 [Tribolium castaneum]	70.25	2e-66
c10922_g3_i1	c10922_g3_i1|m.8081	2.46	gi|642929667|ref|XP_008195928.1|PREDICTED: probable Rho GTPase-activating protein CG5521 isoform X1 [Tribolium castaneum]	73.68	0
c10923_g1_i1	c10923_g1_i1|m.8082	20.3	gi|189240740|ref|XP_968238.2|PREDICTED: phospholipase A-2-activating protein [Tribolium castaneum]	55.58	0
c10923_g1_i1	c10923_g1_i1|m.8083	20.3	gi|478255082|gb|ENN75312.1|hypothetical protein YQE_08089, partial [Dendroctonus ponderosae]	59.63	3e-43
c10924_g1_i1	c10924_g1_i1|m.8084	8.83	gi|642932825|ref|XP_008197001.1|PREDICTED: gamma-glutamyltranspeptidase 1-like isoform X2 [Tribolium castaneum]	62.43	0
c10924_g1_i2	c10924_g1_i2|m.8086	8.76	gi|642932825|ref|XP_008197001.1|PREDICTED: gamma-glutamyltranspeptidase 1-like isoform X2 [Tribolium castaneum]	60.53	0
c10925_g1_i1	c10925_g1_i1|m.8088	17.16	gi|357625687|gb|EHJ76049.1|dimethyladenosine transferase [Danaus plexippus]	80.72	0
c10926_g1_i1	c10926_g1_i1|m.8089	18.26	gi|91089973|ref|XP_973833.1|PREDICTED: exportin-1 [Tribolium castaneum]	89.6	0
c10929_g1_i1	c10929_g1_i1|m.8092	69.3	gi|332375620|gb|AEE62951.1|unknown [Dendroctonus ponderosae]	66.67	5e-111
c10929_g1_i2	c10929_g1_i2|m.8093	77.5	gi|332375620|gb|AEE62951.1|unknown [Dendroctonus ponderosae]	68.03	3e-125
c10930_g1_i1	c10930_g1_i1|m.8094	5.99	gi|642918188|ref|XP_008191403.1|PREDICTED: adenosine 3'-phospho 5'-phosphosulfate transporter 2 isoform X1 [Tribolium castaneum]	71.72	3e-174
c10932_g1_i1	c10932_g1_i1|m.8096	1224.76	gi|665819595|ref|XP_008558666.1|PREDICTED: 60S ribosomal protein L7a [Microplitis demolitor]	85.07	5e-156
c10933_g1_i1	c10933_g1_i1|m.8097	72.87	gi|91094507|ref|XP_971663.1|PREDICTED: 2-oxoisovalerate dehydrogenase subunit alpha, mitochondrial [Tribolium castaneum]	66.14	0
c10934_g1_i1	c10934_g1_i1|m.8098	111.39	gi|357620893|gb|EHJ72917.1|coiled-coil-helix-coiled-coil-helix domain-containing protein 2, mitochondrial-like protein [Danaus plexippus]	59.86	1e-46
c10934_g1_i2	c10934_g1_i2|m.8099	126.81	gi|357620893|gb|EHJ72917.1|coiled-coil-helix-coiled-coil-helix domain-containing protein 2, mitochondrial-like protein [Danaus plexippus]	59.09	2e-48
c10935_g1_i1	c10935_g1_i1|m.8100	219.58	gi|807015634|ref|XP_004517876.2|PREDICTED: trypsin-1-like [Ceratitis capitata]	70	4e-15
c10936_g1_i1	c10936_g1_i1|m.8101	40.41	gi|91077040|ref|XP_967879.1|PREDICTED: signal recognition particle 19 kDa protein [Tribolium castaneum]	80.74	1e-77
c10937_g1_i1	c10937_g1_i1|m.8102	7.65	gi|642934621|ref|XP_008197741.1|PREDICTED: armadillo segment polarity protein-like isoform X1 [Tribolium castaneum]	90.97	0
c10937_g1_i2	c10937_g1_i2|m.8103	7.65	gi|642934623|ref|XP_008197742.1|PREDICTED: armadillo segment polarity protein-like isoform X2 [Tribolium castaneum]	93.57	0
c10937_g1_i3	c10937_g1_i3|m.8104	7.7	gi|642934621|ref|XP_008197741.1|PREDICTED: armadillo segment polarity protein-like isoform X1 [Tribolium castaneum]	90.97	0
c10938_g1_i1	c10938_g1_i1|m.8105	4.76	gi|91077350|ref|XP_974996.1|PREDICTED: WD40 repeat-containing protein SMU1 [Tribolium castaneum]	93.92	0
c10938_g1_i2	c10938_g1_i2|m.8106	4.32	gi|91077350|ref|XP_974996.1|PREDICTED: WD40 repeat-containing protein SMU1 [Tribolium castaneum]	92.16	0
c10939_g1_i1	c10939_g1_i1|m.8107	4.76	gi|546684828|gb|ERL94410.1|hypothetical protein D910_11688 [Dendroctonus ponderosae]	62.68	4e-147
c10940_g1_i1	c10940_g1_i1|m.8108	8.31	gi|91079184|ref|XP_968431.1|PREDICTED: histone acetyltransferase KAT8 [Tribolium castaneum]	88.96	0
c10940_g1_i1	c10940_g1_i1|m.8109	8.31	gi|91078980|ref|XP_974492.1|PREDICTED: cyclin-dependent kinase 10 [Tribolium castaneum]	90.82	0
c10941_g1_i1	c10941_g1_i1|m.8112	6.01	gi|91088453|ref|XP_969131.1|PREDICTED: DIS3-like exonuclease 2 isoform X1 [Tribolium castaneum]	51.75	0
c10942_g1_i1	c10942_g1_i1|m.8113	44.96	gi|189238011|ref|XP_001813334.1|PREDICTED: SH3 domain-binding glutamic acid-rich protein homolog [Tribolium castaneum]	73.6	5e-58
c10943_g1_i1	c10943_g1_i1|m.8114	0.92	gi|642930529|ref|XP_008196443.1|PREDICTED: inositol hexakisphosphate and diphosphoinositol-pentakisphosphate kinase 2 isoform X10 [Tribolium castaneum]	83.25	0
c10943_g1_i2	c10943_g1_i2|m.8115	0.86	gi|642930533|ref|XP_008196445.1|PREDICTED: inositol hexakisphosphate and diphosphoinositol-pentakisphosphate kinase 2 isoform X12 [Tribolium castaneum]	80.95	0
c10943_g1_i3	c10943_g1_i3|m.8116	0.91	gi|642930529|ref|XP_008196443.1|PREDICTED: inositol hexakisphosphate and diphosphoinositol-pentakisphosphate kinase 2 isoform X10 [Tribolium castaneum]	83.24	0
c10943_g1_i4	c10943_g1_i4|m.8117	1.04	gi|642930529|ref|XP_008196443.1|PREDICTED: inositol hexakisphosphate and diphosphoinositol-pentakisphosphate kinase 2 isoform X10 [Tribolium castaneum]	82.7	0
c10943_g1_i5	c10943_g1_i5|m.8118	0.89	gi|642930533|ref|XP_008196445.1|PREDICTED: inositol hexakisphosphate and diphosphoinositol-pentakisphosphate kinase 2 isoform X12 [Tribolium castaneum]	80.59	0
c10943_g1_i6	c10943_g1_i6|m.8119	0.52	gi|270010746|gb|EFA07194.1|hypothetical protein TcasGA2_TC010200 [Tribolium castaneum]	83.33	2e-124
c10944_g1_i1	c10944_g1_i1|m.8120	24.56	gi|817069313|ref|XP_012256626.1|PREDICTED: uncharacterized protein LOC105686408 isoform X5 [Athalia rosae]	67.93	2e-141
c10944_g1_i2	c10944_g1_i2|m.8122	24.28	gi|478250592|gb|ENN71084.1|hypothetical protein YQE_12017, partial [Dendroctonus ponderosae]	63.84	0
c10944_g1_i3	c10944_g1_i3|m.8124	22.32	gi|817069319|ref|XP_012256629.1|PREDICTED: uncharacterized protein LOC105686408 isoform X8 [Athalia rosae]	67.21	3e-149
c10945_g1_i1	c10945_g1_i1|m.8125	3.35	gi|642910289|ref|XP_008198706.1|PREDICTED: U2 snRNP-associated SURP motif-containing protein-like [Tribolium castaneum]	68.28	0
c10945_g1_i2	c10945_g1_i2|m.8126	2.39	gi|642910289|ref|XP_008198706.1|PREDICTED: U2 snRNP-associated SURP motif-containing protein-like [Tribolium castaneum]	72.01	0
c10945_g1_i3	c10945_g1_i3|m.8127	2.97	gi|642910289|ref|XP_008198706.1|PREDICTED: U2 snRNP-associated SURP motif-containing protein-like [Tribolium castaneum]	72.01	0
c10945_g1_i4	c10945_g1_i4|m.8128	2.82	gi|642910289|ref|XP_008198706.1|PREDICTED: U2 snRNP-associated SURP motif-containing protein-like [Tribolium castaneum]	72.01	0
c10947_g1_i1	c10947_g1_i1|m.8129	131.05	gi|270006067|gb|EFA02515.1|hypothetical protein TcasGA2_TC008220 [Tribolium castaneum]	83.33	1e-174
c10950_g1_i1	c10950_g1_i1|m.8132	147.2	gi|91091878|ref|XP_969758.1|PREDICTED: von Willebrand factor D and EGF domain-containing protein [Tribolium castaneum]	60.95	2e-112
c10951_g1_i1	c10951_g1_i1|m.8134	1.19	gi|642916561|ref|XP_008191701.1|PREDICTED: uncharacterized protein LOC100142540 [Tribolium castaneum]	80.5	0
c10951_g1_i2	c10951_g1_i2|m.8135	1.55	gi|642916561|ref|XP_008191701.1|PREDICTED: uncharacterized protein LOC100142540 [Tribolium castaneum]	86.64	0
c10952_g1_i1	c10952_g1_i1|m.8136	41.46	gi|91080807|ref|XP_969972.1|PREDICTED: proteasome subunit alpha type-3 [Tribolium castaneum]	81.96	4e-153
c10953_g1_i1	c10953_g1_i1|m.8137	38.09	gi|91080669|ref|XP_975087.1|PREDICTED: vesicle-trafficking protein SEC22b-B [Tribolium castaneum]	88.26	2e-139
c10954_g1_i1	c10954_g1_i1|m.8138	12.19	gi|91080663|ref|XP_974713.1|PREDICTED: zinc finger protein 330 homolog [Tribolium castaneum]	85.88	4e-162
c10955_g1_i1	c10955_g1_i1|m.8140	4.62	gi|642910827|ref|XP_008193425.1|PREDICTED: guanylate kinase [Tribolium castaneum]	67.91	1e-92
c10955_g1_i2	c10955_g1_i2|m.8141	5.69	gi|642910827|ref|XP_008193425.1|PREDICTED: guanylate kinase [Tribolium castaneum]	67.91	1e-92
c10955_g1_i3	c10955_g1_i3|m.8142	5.15	gi|642910827|ref|XP_008193425.1|PREDICTED: guanylate kinase [Tribolium castaneum]	67.91	1e-92
c10956_g1_i1	c10956_g1_i1|m.8143	231.03	gi|91080533|ref|XP_972324.1|PREDICTED: alpha-actinin, sarcomeric isoform X2 [Tribolium castaneum]	96.88	0
c10958_g1_i1	c10958_g1_i1|m.8144	0.63	gi|270004647|gb|EFA01095.1|hypothetical protein TcasGA2_TC004018 [Tribolium castaneum]	52.5	4e-11
c10958_g2_i1	c10958_g2_i1|m.8145	2.28	gi|642918597|ref|XP_008197482.1|PREDICTED: pleckstrin homology domain-containing family G member 4B-like [Tribolium castaneum]	62.33	0
c10959_g1_i1	c10959_g1_i1|m.8148	23.24	gi|91084417|ref|XP_967827.1|PREDICTED: chromobox protein homolog 3 [Tribolium castaneum]	71.1	2e-82
c10959_g1_i2	c10959_g1_i2|m.8149	17.4	gi|91084417|ref|XP_967827.1|PREDICTED: chromobox protein homolog 3 [Tribolium castaneum]	71.1	2e-82
c10960_g1_i1	c10960_g1_i1|m.8150	5.21	gi|478253546|gb|ENN73864.1|hypothetical protein YQE_09556, partial [Dendroctonus ponderosae]	70.82	2e-114
c10960_g1_i2	c10960_g1_i2|m.8151	4.98	gi|478253546|gb|ENN73864.1|hypothetical protein YQE_09556, partial [Dendroctonus ponderosae]	70.82	5e-114
c10961_g1_i1	c10961_g1_i1|m.8152	21.32	gi|194440585|dbj|BAG65665.1|vasa [Gryllus bimaculatus]	66.19	0
c10962_g1_i1	c10962_g1_i1|m.8155	4.08	gi|642922463|ref|XP_008193182.1|PREDICTED: integrin beta-PS [Tribolium castaneum]	56.49	0
c10963_g1_i1	c10963_g1_i1|m.8156	25.6	gi|91081191|ref|XP_975602.1|PREDICTED: N-alpha-acetyltransferase 16, NatA auxiliary subunit isoform X2 [Tribolium castaneum]	80.32	0
c10965_g1_i1	c10965_g1_i1|m.8159	7.44	gi|91078614|ref|XP_967493.1|PREDICTED: syntaxin-6 [Tribolium castaneum]	85.65	5e-147
c10966_g1_i1	c10966_g1_i1|m.8161	86.1	gi|91077388|ref|XP_975268.1|PREDICTED: peroxiredoxin-2 [Tribolium castaneum]	86.85	1e-135
c10968_g1_i1	c10968_g1_i1|m.8164	14.91	gi|91084361|ref|XP_973332.1|PREDICTED: facilitated trehalose transporter Tret1-2 homolog [Tribolium castaneum]	50.1	1e-157
c10968_g1_i2	c10968_g1_i2|m.8165	13.73	gi|91084361|ref|XP_973332.1|PREDICTED: facilitated trehalose transporter Tret1-2 homolog [Tribolium castaneum]	50.1	1e-157
c10970_g1_i1	c10970_g1_i1|m.8166	8.57	gi|357624069|gb|EHJ74973.1|hypothetical protein KGM_12190 [Danaus plexippus]	66.53	2e-117
c10970_g1_i2	c10970_g1_i2|m.8167	4.11	gi|357624069|gb|EHJ74973.1|hypothetical protein KGM_12190 [Danaus plexippus]	72.4	7e-99
c10971_g1_i1	c10971_g1_i1|m.8168	5.21	gi|546680101|gb|ERL90442.1|hypothetical protein D910_07791 [Dendroctonus ponderosae]	76.62	2e-180
c10971_g1_i2	c10971_g1_i2|m.8169	3.36	gi|642914860|ref|XP_008195065.1|PREDICTED: myosin light chain kinase, smooth muscle-like isoform X1 [Tribolium castaneum]	66.18	0
c10972_g1_i1	c10972_g1_i1|m.8170	135.41	gi|5902765|sp|P56682.1|AMCI_APIMERecName: Full=Chymotrypsin inhibitor; AltName: Full=AMCI	54.9	4e-10
c10973_g1_i1	c10973_g1_i1|m.8171	11.67	gi|642919362|ref|XP_008191840.1|PREDICTED: 39S ribosomal protein L19, mitochondrial [Tribolium castaneum]	63.36	8e-129
c10974_g1_i1	c10974_g1_i1|m.8172	9.27	gi|642923046|ref|XP_008200508.1|PREDICTED: fibronectin type-III domain-containing protein 3A isoform X1 [Tribolium castaneum]	65.71	0
c10974_g1_i2	c10974_g1_i2|m.8173	10.47	gi|642923056|ref|XP_008200513.1|PREDICTED: fibronectin type-III domain-containing protein 3A isoform X4 [Tribolium castaneum]	65.88	0
c10974_g1_i3	c10974_g1_i3|m.8174	10.44	gi|642923048|ref|XP_008200509.1|PREDICTED: fibronectin type-III domain-containing protein 3A isoform X2 [Tribolium castaneum]	66.93	0
c10975_g1_i1	c10975_g1_i1|m.8175	2.67	gi|91077168|ref|XP_972002.1|PREDICTED: organic cation transporter protein isoform X1 [Tribolium castaneum]	60.92	5e-163
c10975_g2_i1	c10975_g2_i1|m.8176	7.3	gi|91086179|ref|XP_970981.1|PREDICTED: uncharacterized protein LOC659596 [Tribolium castaneum]	56.6	2e-35
c10975_g2_i2	c10975_g2_i2|m.8177	5.65	gi|91086179|ref|XP_970981.1|PREDICTED: uncharacterized protein LOC659596 [Tribolium castaneum]	56.6	2e-35
c10975_g2_i3	c10975_g2_i3|m.8178	2.09	gi|91077168|ref|XP_972002.1|PREDICTED: organic cation transporter protein isoform X1 [Tribolium castaneum]	59.6	6e-54
c10977_g1_i1	c10977_g1_i1|m.8180	21.61	gi|642928156|ref|XP_971553.2|PREDICTED: 39S ribosomal protein L40, mitochondrial [Tribolium castaneum]	65.98	4e-79
c10978_g1_i1	c10978_g1_i1|m.8181	18.47	gi|91079324|ref|XP_968119.1|PREDICTED: p21-activated protein kinase-interacting protein 1-like [Tribolium castaneum]	54.09	7e-125
c10979_g2_i1	c10979_g2_i1|m.8182	1.6	gi|642929105|ref|XP_001810643.2|PREDICTED: uncharacterized protein LOC100142047 [Tribolium castaneum]	62.72	0
c10979_g2_i2	c10979_g2_i2|m.8183	1.62	gi|642929105|ref|XP_001810643.2|PREDICTED: uncharacterized protein LOC100142047 [Tribolium castaneum]	63.56	0
c10980_g1_i1	c10980_g1_i1|m.8184	15.84	gi|91086219|ref|XP_972180.1|PREDICTED: protein FAM192A [Tribolium castaneum]	61.18	5e-87
c10981_g1_i1	c10981_g1_i1|m.8185	3.91	gi|546685572|gb|ERL95059.1|hypothetical protein D910_12329 [Dendroctonus ponderosae]	87.22	0
c10983_g1_i1	c10983_g1_i1|m.8188	6.47	gi|332374040|gb|AEE62161.1|unknown [Dendroctonus ponderosae]	69.82	0
c10985_g1_i1	c10985_g1_i1|m.8190	27.15	gi|91094041|ref|XP_968248.1|PREDICTED: mitochondrial import receptor subunit TOM20 homolog [Tribolium castaneum]	62.16	6e-56
c10986_g1_i1	c10986_g1_i1|m.8191	1.76	gi|339247223|ref|XP_003375245.1|putative integrase core domain protein [Trichinella spiralis]	53.38	0
c10986_g1_i1	c10986_g1_i1|m.8192	1.76	gi|861615271|gb|KMQ86059.1|retrovirus-related pol polyprotein from transposon tnt 1-94 [Lasius niger]	55.66	0
c10986_g1_i1	c10986_g1_i1|m.8193	1.76	gi|339259278|ref|XP_003368986.1|retrovirus-related Pol polyprotein from transposon TNT 1-94 [Trichinella spiralis]	56.63	0
c10987_g1_i1	c10987_g1_i1|m.8196	4.03	gi|642910771|ref|XP_008193403.1|PREDICTED: rho GTPase-activating protein 18 [Tribolium castaneum]	64.03	0
c10987_g1_i2	c10987_g1_i2|m.8197	4.17	gi|642910771|ref|XP_008193403.1|PREDICTED: rho GTPase-activating protein 18 [Tribolium castaneum]	63.64	0
c10989_g1_i1	c10989_g1_i1|m.8199	0.65	gi|646722622|gb|KDR23553.1|BTB/POZ domain-containing protein KCTD9 [Zootermopsis nevadensis]	69.51	0
c10989_g1_i2	c10989_g1_i2|m.8200	0.78	gi|646722622|gb|KDR23553.1|BTB/POZ domain-containing protein KCTD9 [Zootermopsis nevadensis]	69.51	0
c10990_g1_i1	c10990_g1_i1|m.8201	29.29	gi|91084649|ref|XP_966904.1|PREDICTED: spermidine synthase [Tribolium castaneum]	67.48	1e-139
c10991_g1_i1	c10991_g1_i1|m.8203	33.41	gi|512913297|ref|XP_004927862.1|PREDICTED: synaptobrevin-1-like [Bombyx mori]	66.35	3e-38
c10991_g1_i2	c10991_g1_i2|m.8205	76.23	gi|512913297|ref|XP_004927862.1|PREDICTED: synaptobrevin-1-like [Bombyx mori]	66.35	3e-38
c10992_g1_i1	c10992_g1_i1|m.8206	8.34	gi|189235837|ref|XP_967852.2|PREDICTED: transmembrane protein 104 homolog [Tribolium castaneum]	60.17	0
c10993_g1_i1	c10993_g1_i1|m.8207	11.04	gi|270014535|gb|EFA10983.1|hypothetical protein TcasGA2_TC004151 [Tribolium castaneum]	55.78	0
c10994_g1_i1	c10994_g1_i1|m.8208	17.64	gi|91077894|ref|XP_973141.1|PREDICTED: protein farnesyltransferase/geranylgeranyltransferase type-1 subunit alpha [Tribolium castaneum]	68.54	1e-159
c10995_g1_i1	c10995_g1_i1|m.8209	2.12	gi|195038217|ref|XP_001990556.1|GH19414 [Drosophila grimshawi]	60.87	2e-08
c10996_g1_i2	c10996_g1_i2|m.8210	20.22	gi|270005334|gb|EFA01782.1|hypothetical protein TcasGA2_TC007383 [Tribolium castaneum]	50.74	2e-124
c10997_g1_i2	c10997_g1_i2|m.8212	10.71	gi|642911471|ref|XP_008199437.1|PREDICTED: LOW QUALITY PROTEIN: dihydropyrimidinase [Tribolium castaneum]	81.2	2e-138
c10997_g1_i2	c10997_g1_i2|m.8214	10.71	gi|642911471|ref|XP_008199437.1|PREDICTED: LOW QUALITY PROTEIN: dihydropyrimidinase [Tribolium castaneum]	80.85	1e-73
c10997_g1_i3	c10997_g1_i3|m.8215	14.48	gi|642911471|ref|XP_008199437.1|PREDICTED: LOW QUALITY PROTEIN: dihydropyrimidinase [Tribolium castaneum]	78.76	0
c10997_g1_i4	c10997_g1_i4|m.8217	13.32	gi|642911471|ref|XP_008199437.1|PREDICTED: LOW QUALITY PROTEIN: dihydropyrimidinase [Tribolium castaneum]	79.48	0
c10997_g1_i5	c10997_g1_i5|m.8219	13.06	gi|642911471|ref|XP_008199437.1|PREDICTED: LOW QUALITY PROTEIN: dihydropyrimidinase [Tribolium castaneum]	75.87	0
c10998_g1_i1	c10998_g1_i1|m.8221	1.94	gi|189241799|ref|XP_970228.2|PREDICTED: inverted formin-2 [Tribolium castaneum]	60.87	0
c10999_g1_i1	c10999_g1_i1|m.8222	5.04	gi|642912276|ref|XP_008200634.1|PREDICTED: exportin-7 isoform X2 [Tribolium castaneum]	93.99	0
c10999_g1_i2	c10999_g1_i2|m.8223	3.92	gi|642912274|ref|XP_008200633.1|PREDICTED: exportin-7 isoform X1 [Tribolium castaneum]	94.16	0
c10999_g1_i3	c10999_g1_i3|m.8224	4.66	gi|642912274|ref|XP_008200633.1|PREDICTED: exportin-7 isoform X1 [Tribolium castaneum]	93.86	0
c11000_g2_i1	c11000_g2_i1|m.8225	18.92	gi|225543476|ref|NP_001139385.1|ventral vein lacking [Tribolium castaneum]	91.22	0
c11002_g1_i1	c11002_g1_i1|m.8228	19.84	gi|478263634|gb|ENN81940.1|hypothetical protein YQE_01651, partial [Dendroctonus ponderosae]	52.36	2e-171
c11005_g1_i1	c11005_g1_i1|m.8231	0.83	gi|795360673|ref|XP_011747607.1|PREDICTED: structural maintenance of chromosomes protein 6-like isoform X2 [Macaca nemestrina]	52.87	8e-19
c11005_g1_i2	c11005_g1_i2|m.8232	1.34	gi|585676602|ref|XP_006818993.1|PREDICTED: structural maintenance of chromosomes protein 6-like [Saccoglossus kowalevskii]	53.14	8e-57
c11007_g1_i1	c11007_g1_i1|m.8234	1.85	gi|91080649|ref|XP_974556.1|PREDICTED: E3 ubiquitin-protein ligase TRIM9 [Tribolium castaneum]	85.55	0
c11008_g1_i1	c11008_g1_i1|m.8235	113.19	gi|642928387|ref|XP_008192723.1|PREDICTED: dihydrolipoyllysine-residue succinyltransferase component of 2-oxoglutarate dehydrogenase complex, mitochondrial [Tribolium castaneum]	63.15	0
c11009_g1_i1	c11009_g1_i1|m.8236	7.04	gi|189238253|ref|XP_001813297.1|PREDICTED: GPN-loop GTPase 3 [Tribolium castaneum]	71.9	1e-146
c11010_g1_i1	c11010_g1_i1|m.8237	17.16	gi|91093162|ref|XP_967461.1|PREDICTED: nucleolar complex protein 4 homolog B [Tribolium castaneum]	67.27	0
c11011_g1_i1	c11011_g1_i1|m.8238	9.25	gi|646689672|gb|KDR06661.1|NAD-dependent deacetylase sirtuin-2 [Zootermopsis nevadensis]	67.73	3e-172
c11011_g1_i2	c11011_g1_i2|m.8240	6.96	gi|646689672|gb|KDR06661.1|NAD-dependent deacetylase sirtuin-2 [Zootermopsis nevadensis]	67.73	2e-172
c11012_g1_i2	c11012_g1_i2|m.8242	57.82	gi|642911826|ref|XP_008200761.1|PREDICTED: dnaJ protein homolog 1 [Tribolium castaneum]	82.87	0
c11017_g1_i1	c11017_g1_i1|m.8252	5.23	gi|642927913|ref|XP_008195445.1|PREDICTED: tRNA selenocysteine 1-associated protein 1 isoform X1 [Tribolium castaneum]	79.08	2e-155
c11017_g1_i2	c11017_g1_i2|m.8253	6.22	gi|642927913|ref|XP_008195445.1|PREDICTED: tRNA selenocysteine 1-associated protein 1 isoform X1 [Tribolium castaneum]	79.93	2e-169
c11017_g1_i3	c11017_g1_i3|m.8254	4.99	gi|642927913|ref|XP_008195445.1|PREDICTED: tRNA selenocysteine 1-associated protein 1 isoform X1 [Tribolium castaneum]	78.89	4e-147
c11019_g1_i1	c11019_g1_i1|m.8256	1.82	gi|478259929|gb|ENN79731.1|hypothetical protein YQE_03787, partial [Dendroctonus ponderosae]	52.14	2e-162
c11019_g1_i2	c11019_g1_i2|m.8258	1.39	gi|646701441|gb|KDR11155.1|RSM22-like protein, mitochondrial [Zootermopsis nevadensis]	60.61	1e-97
c11021_g1_i1	c11021_g1_i1|m.8259	17.93	gi|270001802|gb|EEZ98249.1|hypothetical protein TcasGA2_TC000688 [Tribolium castaneum]	84.9	0
c11021_g1_i2	c11021_g1_i2|m.8260	20.51	gi|642913160|ref|XP_008201417.1|PREDICTED: glycerol-3-phosphate dehydrogenase [NAD(+)], cytoplasmic isoform X3 [Tribolium castaneum]	84.62	0
c11022_g1_i1	c11022_g1_i1|m.8261	6.04	gi|269995925|ref|NP_001161785.1|yellow-3 [Tribolium castaneum]	50.61	4e-145
c11023_g1_i1	c11023_g1_i1|m.8262	1.1	gi|642924116|ref|XP_008194013.1|PREDICTED: growth factor receptor-bound protein 14-like isoform X3 [Tribolium castaneum]	77.01	0
c11023_g1_i2	c11023_g1_i2|m.8263	2.05	gi|642924116|ref|XP_008194013.1|PREDICTED: growth factor receptor-bound protein 14-like isoform X3 [Tribolium castaneum]	86.38	3e-124
c11023_g1_i3	c11023_g1_i3|m.8264	1.18	gi|642924112|ref|XP_008194010.1|PREDICTED: growth factor receptor-bound protein 14-like isoform X1 [Tribolium castaneum]	80.6	0
c11023_g1_i4	c11023_g1_i4|m.8265	1.27	gi|642924112|ref|XP_008194010.1|PREDICTED: growth factor receptor-bound protein 14-like isoform X1 [Tribolium castaneum]	76.14	0
c11024_g1_i1	c11024_g1_i1|m.8266	0.79	gi|91087273|ref|XP_975542.1|PREDICTED: guanine nucleotide-binding protein subunit beta-5 [Tribolium castaneum]	90.24	5e-73
c11024_g1_i2	c11024_g1_i2|m.8267	0.74	gi|91087273|ref|XP_975542.1|PREDICTED: guanine nucleotide-binding protein subunit beta-5 [Tribolium castaneum]	92.59	0
c11024_g1_i3	c11024_g1_i3|m.8268	0.7	gi|91087273|ref|XP_975542.1|PREDICTED: guanine nucleotide-binding protein subunit beta-5 [Tribolium castaneum]	91.81	0
c11024_g1_i4	c11024_g1_i4|m.8269	0.92	gi|91087273|ref|XP_975542.1|PREDICTED: guanine nucleotide-binding protein subunit beta-5 [Tribolium castaneum]	92.49	5e-141
c11024_g1_i4	c11024_g1_i4|m.8270	0.92	gi|91087273|ref|XP_975542.1|PREDICTED: guanine nucleotide-binding protein subunit beta-5 [Tribolium castaneum]	92.54	3e-86
c11025_g1_i1	c11025_g1_i1|m.8271	2.15	gi|820132708|gb|KKX07106.1|ftsJ methyltransferase domain-containing protein 1-like isoform X3 [Scleropages formosus]	65.12	1e-29
c11025_g1_i2	c11025_g1_i2|m.8272	1.75	gi|585637399|ref|XP_006878930.1|PREDICTED: cap-specific mRNA (nucleoside-2'-O-)-methyltransferase 2 [Elephantulus edwardii]	50.44	8e-67
c11026_g1_i1	c11026_g1_i1|m.8273	8.88	gi|91086937|ref|XP_972589.1|PREDICTED: uncharacterized protein LOC661332 [Tribolium castaneum]	60.36	6e-63
c11027_g1_i1	c11027_g1_i1|m.8274	3.43	gi|546674397|gb|ERL85784.1|hypothetical protein D910_03199 [Dendroctonus ponderosae]	64.29	0
c11029_g1_i1	c11029_g1_i1|m.8278	270.35	gi|91077984|ref|XP_968658.1|PREDICTED: serine protease 42 [Tribolium castaneum]	61.93	3e-171
c11030_g1_i1	c11030_g1_i1|m.8280	16.76	gi|478256682|gb|ENN76864.1|hypothetical protein YQE_06705, partial [Dendroctonus ponderosae]	90.97	0
c11030_g1_i2	c11030_g1_i2|m.8281	17.61	gi|478256682|gb|ENN76864.1|hypothetical protein YQE_06705, partial [Dendroctonus ponderosae]	90.97	0
c11031_g1_i1	c11031_g1_i1|m.8282	10.53	gi|91087123|ref|XP_975206.1|PREDICTED: mRNA export factor [Tribolium castaneum]	86.91	0
c11034_g1_i1	c11034_g1_i1|m.8284	5.38	gi|189233723|ref|XP_970246.2|PREDICTED: leishmanolysin-like peptidase [Tribolium castaneum]	80.72	0
c11035_g1_i2	c11035_g1_i2|m.8285	4.04	gi|270014569|gb|EFA11017.1|hypothetical protein TcasGA2_TC004604 [Tribolium castaneum]	51.61	3e-66
c11035_g1_i2	c11035_g1_i2|m.8286	4.04	gi|189233697|ref|XP_966459.2|PREDICTED: uncharacterized protein C17orf59 homolog [Tribolium castaneum]	67.97	1e-107
c11035_g1_i3	c11035_g1_i3|m.8287	3.79	gi|189233697|ref|XP_966459.2|PREDICTED: uncharacterized protein C17orf59 homolog [Tribolium castaneum]	74.22	1e-125
c11035_g1_i3	c11035_g1_i3|m.8288	3.79	gi|270014569|gb|EFA11017.1|hypothetical protein TcasGA2_TC004604 [Tribolium castaneum]	51.61	5e-66
c11035_g1_i4	c11035_g1_i4|m.8289	4.07	gi|189233697|ref|XP_966459.2|PREDICTED: uncharacterized protein C17orf59 homolog [Tribolium castaneum]	74.22	1e-125
c11035_g1_i4	c11035_g1_i4|m.8290	4.07	gi|270014569|gb|EFA11017.1|hypothetical protein TcasGA2_TC004604 [Tribolium castaneum]	51.61	3e-66
c11038_g1_i1	c11038_g1_i1|m.8294	9.36	gi|642913883|ref|XP_975200.2|PREDICTED: forkhead box protein O isoform X1 [Tribolium castaneum]	78.51	0
c11039_g1_i1	c11039_g1_i1|m.8295	62.86	gi|91095023|ref|XP_970355.1|PREDICTED: inhibin beta chain [Tribolium castaneum]	64.94	0
c11040_g1_i1	c11040_g1_i1|m.8296	9.58	gi|478260599|gb|ENN80302.1|hypothetical protein YQE_03295, partial [Dendroctonus ponderosae]	55.94	3e-172
c11041_g1_i3	c11041_g1_i3|m.8297	39.39	gi|645039648|ref|XP_003424762.2|PREDICTED: sulfotransferase 1C4-like [Nasonia vitripennis]	50.72	1e-40
c11043_g1_i1	c11043_g1_i1|m.8304	3.22	gi|546678471|gb|ERL89079.1|hypothetical protein D910_06456 [Dendroctonus ponderosae]	55.84	0
c11044_g1_i1	c11044_g1_i1|m.8305	1.89	gi|642928535|ref|XP_008195364.1|PREDICTED: uncharacterized protein LOC103313570 [Tribolium castaneum]	51.72	5e-21
c11044_g1_i1	c11044_g1_i1|m.8306	1.89	gi|642928535|ref|XP_008195364.1|PREDICTED: uncharacterized protein LOC103313570 [Tribolium castaneum]	53.64	2e-33
c11044_g1_i1	c11044_g1_i1|m.8307	1.89	gi|546679571|gb|ERL90019.1|hypothetical protein D910_07377 [Dendroctonus ponderosae]	52.58	1e-15
c11045_g1_i1	c11045_g1_i1|m.8308	51.66	gi|642920715|ref|XP_008192533.1|PREDICTED: TATA-box-binding protein isoform X1 [Tribolium castaneum]	68.03	6e-120
c11046_g1_i1	c11046_g1_i1|m.8309	30.04	gi|749776984|ref|XP_011143393.1|PREDICTED: 60S ribosomal export protein NMD3 [Harpegnathos saltator]	72.76	0
c11048_g2_i1	c11048_g2_i1|m.8310	3.45	gi|91081213|ref|XP_975619.1|PREDICTED: proto-oncogene c-Fos isoform X2 [Tribolium castaneum]	50.71	2e-31
c11048_g2_i2	c11048_g2_i2|m.8311	6.86	gi|91081213|ref|XP_975619.1|PREDICTED: proto-oncogene c-Fos isoform X2 [Tribolium castaneum]	63.11	1e-124
c11048_g2_i3	c11048_g2_i3|m.8312	4.97	gi|91081213|ref|XP_975619.1|PREDICTED: proto-oncogene c-Fos isoform X2 [Tribolium castaneum]	62.22	6e-122
c11050_g1_i1	c11050_g1_i1|m.8314	10.67	gi|91084637|ref|XP_974735.1|PREDICTED: protein FAM188A homolog isoform X1 [Tribolium castaneum]	61.12	0
c11051_g1_i1	c11051_g1_i1|m.8315	4.26	gi|642926686|ref|XP_008194968.1|PREDICTED: optomotor-blind protein [Tribolium castaneum]	85.52	0
c11053_g1_i1	c11053_g1_i1|m.8316	15.9	gi|91080581|ref|XP_973561.1|PREDICTED: splicing factor 3A subunit 2 [Tribolium castaneum]	91.14	8e-160
c11055_g1_i1	c11055_g1_i1|m.8320	35.03	gi|91078416|ref|XP_974657.1|PREDICTED: 39S ribosomal protein L42, mitochondrial [Tribolium castaneum]	77.42	2e-46
c11055_g1_i1	c11055_g1_i1|m.8321	35.03	gi|91078414|ref|XP_974638.1|PREDICTED: huntingtin-interacting protein K [Tribolium castaneum]	79.66	1e-58
c11057_g1_i1	c11057_g1_i1|m.8322	26.59	gi|189236516|ref|XP_975405.2|PREDICTED: leucine-rich repeat-containing protein 58 [Tribolium castaneum]	62.43	6e-154
c11059_g1_i1	c11059_g1_i1|m.8326	15.25	gi|642924886|ref|XP_008194084.1|PREDICTED: serine/threonine-protein kinase MST4 isoform X2 [Tribolium castaneum]	81.66	0
c1106_g1_i1	c1106_g1_i1|m.326	1.56	gi|642937892|ref|XP_008200345.1|PREDICTED: E3 ubiquitin-protein ligase UBR4 isoform X1 [Tribolium castaneum]	61.38	0
c11060_g1_i1	c11060_g1_i1|m.8327	2.2	gi|91094387|ref|XP_971192.1|PREDICTED: DNA polymerase eta [Tribolium castaneum]	50.07	0
c11062_g1_i1	c11062_g1_i1|m.8330	7.54	gi|291222252|ref|XP_002731131.1|PREDICTED: U1 small nuclear ribonucleoprotein 70 kDa-like, partial [Saccoglossus kowalevskii]	86.44	3e-25
c11062_g1_i1	c11062_g1_i1|m.8332	7.54	gi|675388340|gb|KFM81237.1|U1 small nuclear ribonucleoprotein, partial [Stegodyphus mimosarum]	74.38	1e-83
c11062_g1_i2	c11062_g1_i2|m.8333	14.84	gi|193657247|ref|XP_001947021.1|PREDICTED: U1 small nuclear ribonucleoprotein 70 kDa-like [Acyrthosiphon pisum]	63.59	3e-117
c11062_g1_i3	c11062_g1_i3|m.8335	9.11	gi|291222252|ref|XP_002731131.1|PREDICTED: U1 small nuclear ribonucleoprotein 70 kDa-like, partial [Saccoglossus kowalevskii]	86.44	3e-25
c11062_g1_i3	c11062_g1_i3|m.8337	9.11	gi|675388340|gb|KFM81237.1|U1 small nuclear ribonucleoprotein, partial [Stegodyphus mimosarum]	75.16	1e-82
c11064_g1_i1	c11064_g1_i1|m.8339	9.5	gi|91083955|ref|XP_975011.1|PREDICTED: prolactin regulatory element-binding protein isoform X1 [Tribolium castaneum]	67.87	0
c11065_g1_i1	c11065_g1_i1|m.8340	147.65	gi|546675018|gb|ERL86281.1|hypothetical protein D910_03690 [Dendroctonus ponderosae]	66.41	0
c11065_g1_i2	c11065_g1_i2|m.8341	109.53	gi|546675018|gb|ERL86281.1|hypothetical protein D910_03690 [Dendroctonus ponderosae]	61.76	6e-75
c11066_g1_i1	c11066_g1_i1|m.8342	8.38	gi|91081613|ref|XP_966546.1|PREDICTED: protein goliath-like [Tribolium castaneum]	61.96	2e-128
c11066_g1_i1	c11066_g1_i1|m.8343	8.38	gi|270005093|gb|EFA01541.1|hypothetical protein TcasGA2_TC007101 [Tribolium castaneum]	64.56	5e-19
c11066_g1_i2	c11066_g1_i2|m.8344	12.19	gi|91081613|ref|XP_966546.1|PREDICTED: protein goliath-like [Tribolium castaneum]	63.11	5e-168
c11066_g1_i3	c11066_g1_i3|m.8345	10.34	gi|91081613|ref|XP_966546.1|PREDICTED: protein goliath-like [Tribolium castaneum]	61.96	2e-128
c11066_g1_i3	c11066_g1_i3|m.8346	10.34	gi|270005093|gb|EFA01541.1|hypothetical protein TcasGA2_TC007101 [Tribolium castaneum]	65.56	9e-25
c11067_g1_i1	c11067_g1_i1|m.8347	38.71	gi|91090696|ref|XP_974756.1|PREDICTED: transmembrane emp24 domain-containing protein A [Tribolium castaneum]	73.62	2e-131
c11068_g1_i1	c11068_g1_i1|m.8348	52.71	gi|642910961|ref|XP_008193484.1|PREDICTED: leukocyte elastase inhibitor-like [Tribolium castaneum]	50.64	6e-138
c11070_g1_i2	c11070_g1_i2|m.8352	16.6	gi|642915732|ref|XP_008190780.1|PREDICTED: lipopolysaccharide-induced tumor necrosis factor-alpha factor homolog [Tribolium castaneum]	51.69	4e-22
c11071_g1_i1	c11071_g1_i1|m.8353	18.08	gi|478257488|gb|ENN77644.1|hypothetical protein YQE_05938, partial [Dendroctonus ponderosae]	51.91	3e-47
c11072_g1_i1	c11072_g1_i1|m.8354	57.54	gi|91088179|ref|XP_972438.1|PREDICTED: hydroxyacylglutathione hydrolase, mitochondrial [Tribolium castaneum]	69.05	6e-146
c11073_g1_i1	c11073_g1_i1|m.8355	2.57	gi|91076316|ref|XP_969753.1|PREDICTED: xylulose kinase [Tribolium castaneum]	70.71	1e-175
c11073_g1_i2	c11073_g1_i2|m.8356	4.25	gi|91076316|ref|XP_969753.1|PREDICTED: xylulose kinase [Tribolium castaneum]	70.64	0
c11074_g2_i1	c11074_g2_i1|m.8357	7.64	gi|642929001|ref|XP_008195650.1|PREDICTED: thrombospondin type-1 domain-containing protein 4-like [Tribolium castaneum]	52.15	0
c11075_g1_i1	c11075_g1_i1|m.8359	2.67	gi|642936015|ref|XP_008198269.1|PREDICTED: histone-lysine N-methyltransferase NSD2 [Tribolium castaneum]	65.92	0
c11076_g1_i1	c11076_g1_i1|m.8361	1.07	gi|642922261|ref|XP_008193083.1|PREDICTED: leucine-rich repeat and calponin homology domain-containing protein 3 isoform X3 [Tribolium castaneum]	62.38	0
c11076_g1_i2	c11076_g1_i2|m.8362	1.49	gi|642922261|ref|XP_008193083.1|PREDICTED: leucine-rich repeat and calponin homology domain-containing protein 3 isoform X3 [Tribolium castaneum]	62.38	0
c11077_g1_i1	c11077_g1_i1|m.8363	18.07	gi|189239223|ref|XP_973572.2|PREDICTED: DAZ-associated protein 2 isoform X1 [Tribolium castaneum]	86.71	4e-59
c11078_g1_i1	c11078_g1_i1|m.8364	16.25	gi|642910332|ref|XP_008200286.1|PREDICTED: threonylcarbamoyladenosine tRNA methylthiotransferase [Tribolium castaneum]	77.65	0
c11079_g1_i1	c11079_g1_i1|m.8365	1.48	gi|642927627|ref|XP_008195340.1|PREDICTED: BTB/POZ domain-containing protein 6 isoform X4 [Tribolium castaneum]	89.53	0
c11079_g1_i2	c11079_g1_i2|m.8366	1.49	gi|642927627|ref|XP_008195340.1|PREDICTED: BTB/POZ domain-containing protein 6 isoform X4 [Tribolium castaneum]	90.87	0
c11079_g1_i3	c11079_g1_i3|m.8367	1.26	gi|642927619|ref|XP_008195336.1|PREDICTED: BTB/POZ domain-containing protein 6 isoform X1 [Tribolium castaneum]	85.92	0
c11080_g1_i1	c11080_g1_i1|m.8368	8.23	gi|91092984|ref|XP_967771.1|PREDICTED: programmed cell death protein 5 [Tribolium castaneum]	77.52	2e-61
c11080_g1_i2	c11080_g1_i2|m.8369	17.25	gi|91092984|ref|XP_967771.1|PREDICTED: programmed cell death protein 5 [Tribolium castaneum]	78.29	4e-62
c11081_g1_i1	c11081_g1_i1|m.8370	1.66	gi|642918835|ref|XP_008191606.1|PREDICTED: DENN domain-containing protein 5B [Tribolium castaneum]	76.65	0
c11081_g1_i2	c11081_g1_i2|m.8371	1.39	gi|642918835|ref|XP_008191606.1|PREDICTED: DENN domain-containing protein 5B [Tribolium castaneum]	73.29	0
c11081_g1_i2	c11081_g1_i2|m.8372	1.39	gi|642918835|ref|XP_008191606.1|PREDICTED: DENN domain-containing protein 5B [Tribolium castaneum]	77.92	0
c11083_g1_i1	c11083_g1_i1|m.8374	13.88	gi|642911665|ref|XP_969599.2|PREDICTED: uncharacterized protein C45G9.7 [Tribolium castaneum]	92.44	5e-77
c11084_g1_i1	c11084_g1_i1|m.8375	6.33	gi|546682276|gb|ERL92237.1|hypothetical protein D910_09554 [Dendroctonus ponderosae]	61.67	4e-170
c11085_g1_i1	c11085_g1_i1|m.8377	6.79	gi|189238464|ref|XP_966906.2|PREDICTED: peptidylprolyl isomerase domain and WD repeat-containing protein 1 [Tribolium castaneum]	74.75	0
c11086_g1_i1	c11086_g1_i1|m.8379	7.96	gi|642929686|ref|XP_008195936.1|PREDICTED: uncharacterized protein LOC103313713 isoform X1 [Tribolium castaneum]	64.19	5e-176
c11087_g1_i2	c11087_g1_i2|m.8380	0.39	gi|795010212|ref|XP_011865812.1|PREDICTED: uncharacterized protein LOC105560908, partial [Vollenhovia emeryi]	50	7e-17
c11087_g3_i1	c11087_g3_i1|m.8381	1.5	gi|607361375|gb|EZA55663.1|hypothetical protein X777_04305 [Cerapachys biroi]	53.06	2e-23
c11088_g1_i1	c11088_g1_i1|m.8382	7.07	gi|642925692|ref|XP_008194672.1|PREDICTED: ATP-binding cassette sub-family B member 6, mitochondrial isoform X1 [Tribolium castaneum]	72.56	0
c11088_g1_i2	c11088_g1_i2|m.8383	7.04	gi|642925692|ref|XP_008194672.1|PREDICTED: ATP-binding cassette sub-family B member 6, mitochondrial isoform X1 [Tribolium castaneum]	72.56	0
c11089_g1_i1	c11089_g1_i1|m.8384	33.22	gi|91091060|ref|XP_966576.1|PREDICTED: cytochrome c-type heme lyase [Tribolium castaneum]	69.29	2e-127
c11090_g1_i1	c11090_g1_i1|m.8385	9.01	gi|91076314|ref|XP_969681.1|PREDICTED: splicing factor 3A subunit 1 isoform X1 [Tribolium castaneum]	79.53	0
c11092_g1_i3	c11092_g1_i3|m.8387	4.1	gi|91083995|ref|XP_975252.1|PREDICTED: E3 ubiquitin-protein ligase MARCH8 [Tribolium castaneum]	60.82	2e-131
c11093_g1_i1	c11093_g1_i1|m.8389	3.91	gi|803289297|ref|XP_012004308.1|PREDICTED: aprataxin and PNK-like factor isoform X3 [Ovis aries musimon]	52.94	4e-13
c11094_g1_i1	c11094_g1_i1|m.8391	2.25	gi|270001314|gb|EEZ97761.1|hect domain and RLD 2-like protein [Tribolium castaneum]	80.83	0
c11095_g1_i1	c11095_g1_i1|m.8394	16.27	gi|913331315|ref|XP_013197226.1|PREDICTED: wiskott-Aldrich syndrome protein-like [Amyelois transitella]	55.07	7e-44
c11096_g1_i1	c11096_g1_i1|m.8395	409.98	gi|642916360|ref|XP_008190988.1|PREDICTED: protein disulfide-isomerase [Tribolium castaneum]	69.62	4e-164
c11096_g1_i1	c11096_g1_i1|m.8396	409.98	gi|189235321|ref|XP_975176.2|PREDICTED: methyltransferase-like protein 22 [Tribolium castaneum]	57.04	5e-93
c11096_g1_i1	c11096_g1_i1|m.8397	409.98	gi|662205677|ref|XP_008476263.1|PREDICTED: protein disulfide-isomerase-like [Diaphorina citri]	61.15	1e-60
c11097_g3_i1	c11097_g3_i1|m.8398	1.54	gi|91076108|ref|XP_968944.1|PREDICTED: exostosin-1 [Tribolium castaneum]	77.22	0
c11098_g1_i1	c11098_g1_i1|m.8399	24.17	gi|91082073|ref|XP_966419.1|PREDICTED: 26S proteasome non-ATPase regulatory subunit 1 [Tribolium castaneum]	85.85	0
c11099_g1_i1	c11099_g1_i1|m.8400	20.06	gi|820805544|gb|AKG92763.1|max [Leptinotarsa decemlineata]	78.57	3e-83
c111_g1_i1	c111_g1_i1|m.37	1.11	gi|642912013|ref|XP_008199060.1|PREDICTED: uncharacterized protein LOC103314519 [Tribolium castaneum]	57.84	2e-88
c111_g2_i1	c111_g2_i1|m.38	1.17	gi|270015099|gb|EFA11547.1|branchless [Tribolium castaneum]	55	1e-18
c11100_g1_i1	c11100_g1_i1|m.8401	59.33	gi|11993663|gb|AAG42838.1|AF322911_1inducible heat shock 70 kDa protein, partial [Leptinotarsa decemlineata]	64.18	9e-48
c11101_g1_i1	c11101_g1_i1|m.8402	16.59	gi|546671730|gb|ERL83919.1|hypothetical protein D910_01211 [Dendroctonus ponderosae]	59.77	1e-109
c11102_g1_i1	c11102_g1_i1|m.8403	10.6	gi|646695663|gb|KDR08427.1|Structure-specific endonuclease subunit slx1, partial [Zootermopsis nevadensis]	58.3	8e-105
c11104_g1_i1	c11104_g1_i1|m.8405	28.77	gi|642917373|ref|XP_001806886.2|PREDICTED: N-alpha-acetyltransferase 10 [Tribolium castaneum]	93.45	3e-113
c11104_g1_i2	c11104_g1_i2|m.8406	21.25	gi|642917373|ref|XP_001806886.2|PREDICTED: N-alpha-acetyltransferase 10 [Tribolium castaneum]	93.45	3e-113
c11105_g1_i1	c11105_g1_i1|m.8407	2.69	gi|642936096|ref|XP_008198301.1|PREDICTED: PR domain zinc finger protein 10-like isoform X2 [Tribolium castaneum]	52.44	0
c11106_g1_i1	c11106_g1_i1|m.8408	41.14	gi|478254963|gb|ENN75196.1|hypothetical protein YQE_08207, partial [Dendroctonus ponderosae]	71.54	0
c11107_g1_i1	c11107_g1_i1|m.8409	3.39	gi|91081587|ref|XP_975337.1|PREDICTED: programmed cell death protein 2 [Tribolium castaneum]	56.23	5e-129
c11107_g1_i2	c11107_g1_i2|m.8410	2.22	gi|91081587|ref|XP_975337.1|PREDICTED: programmed cell death protein 2 [Tribolium castaneum]	56.52	2e-38
c1111_g1_i1	c1111_g1_i1|m.329	1.21	gi|642916219|ref|XP_008190935.1|PREDICTED: cytochrome P450 CYP12A2-like [Tribolium castaneum]	57.11	0
c11111_g1_i1	c11111_g1_i1|m.8419	2.87	gi|642911720|ref|XP_971006.2|PREDICTED: polycomb group RING finger protein 3 [Tribolium castaneum]	94.69	2e-157
c11112_g1_i1	c11112_g1_i1|m.8420	28.23	gi|478255566|gb|ENN75783.1|hypothetical protein YQE_07740, partial [Dendroctonus ponderosae]	71	2e-38
c11112_g1_i2	c11112_g1_i2|m.8421	14.38	gi|478255566|gb|ENN75783.1|hypothetical protein YQE_07740, partial [Dendroctonus ponderosae]	56.29	9e-122
c11113_g1_i1	c11113_g1_i1|m.8422	3.06	gi|642913372|ref|XP_008195444.1|PREDICTED: protein SHQ1 homolog [Tribolium castaneum]	56.15	4e-150
c11115_g1_i1	c11115_g1_i1|m.8424	14.35	gi|91086121|ref|XP_968297.1|PREDICTED: adenine phosphoribosyltransferase [Tribolium castaneum]	54.75	7e-61
c11116_g1_i1	c11116_g1_i1|m.8425	6.41	gi|91088979|ref|XP_966749.1|PREDICTED: macoilin isoform X2 [Tribolium castaneum]	74.45	0
c11118_g1_i1	c11118_g1_i1|m.8427	38.74	gi|91083421|ref|XP_969043.1|PREDICTED: 26S proteasome non-ATPase regulatory subunit 7 [Tribolium castaneum]	93.4	0
c11119_g1_i1	c11119_g1_i1|m.8428	8.18	gi|91077592|ref|XP_973319.1|PREDICTED: decaprenyl-diphosphate synthase subunit 1 [Tribolium castaneum]	76.51	0
c11119_g1_i1	c11119_g1_i1|m.8429	8.18	gi|91077594|ref|XP_973353.1|PREDICTED: 39S ribosomal protein L32, mitochondrial [Tribolium castaneum]	64.36	5e-72
c11119_g1_i2	c11119_g1_i2|m.8430	6.58	gi|91077592|ref|XP_973319.1|PREDICTED: decaprenyl-diphosphate synthase subunit 1 [Tribolium castaneum]	76.51	0
c11119_g1_i2	c11119_g1_i2|m.8431	6.58	gi|91077594|ref|XP_973353.1|PREDICTED: 39S ribosomal protein L32, mitochondrial [Tribolium castaneum]	58.04	5e-70
c11122_g1_i1	c11122_g1_i1|m.8434	4.92	gi|91090232|ref|XP_968695.1|PREDICTED: vacuolar protein sorting-associated protein 51 homolog [Tribolium castaneum]	78.7	0
c11122_g1_i1	c11122_g1_i1|m.8435	4.92	gi|478250417|gb|ENN70912.1|hypothetical protein YQE_12315, partial [Dendroctonus ponderosae]	75.95	5e-33
c11124_g1_i1	c11124_g1_i1|m.8437	76.37	gi|91079000|ref|XP_974711.1|PREDICTED: zinc transporter ZIP1 [Tribolium castaneum]	53.42	1e-104
c11124_g2_i1	c11124_g2_i1|m.8438	21.76	gi|91078996|ref|XP_974675.1|PREDICTED: zinc transporter ZIP1 [Tribolium castaneum]	69.65	1e-169
c11126_g1_i1	c11126_g1_i1|m.8443	2.53	gi|270007363|gb|EFA03811.1|hypothetical protein TcasGA2_TC013924 [Tribolium castaneum]	65.79	0
c11126_g1_i2	c11126_g1_i2|m.8444	3.5	gi|642921884|ref|XP_967663.2|PREDICTED: conserved oligomeric Golgi complex subunit 5 [Tribolium castaneum]	67.07	0
c11127_g1_i1	c11127_g1_i1|m.8445	2.16	gi|801383275|ref|XP_012054787.1|PREDICTED: trypsin-1 [Atta cephalotes]	54.9	7e-09
c11127_g1_i1	c11127_g1_i1|m.8446	2.16	gi|307214316|gb|EFN89400.1|hypothetical protein EAI_07694, partial [Harpegnathos saltator]	58.14	2e-23
c11128_g2_i1	c11128_g2_i1|m.8447	1.59	gi|817193300|ref|XP_012272105.1|PREDICTED: gonadotropin-releasing hormone II receptor isoform X1 [Orussus abietinus]	67.15	3e-168
c11128_g2_i2	c11128_g2_i2|m.8449	1.03	gi|134053892|ref|NP_001076809.1|adipokinetic hormone receptor [Tribolium castaneum]	67.9	8e-175
c11129_g1_i1	c11129_g1_i1|m.8451	22.26	gi|135425|sp|P09645.1|TBA8_CHICKRecName: Full=Tubulin alpha-8 chain, partial [Gallus gallus]	93.58	3e-129
c11129_g2_i1	c11129_g2_i1|m.8452	26.41	gi|568249318|gb|ETN59126.1|tubulin alpha chain [Anopheles darlingi]	95.85	0
c11130_g1_i1	c11130_g1_i1|m.8453	1.02	gi|642930100|ref|XP_008196251.1|PREDICTED: putative epidermal cell surface receptor isoform X2 [Tribolium castaneum]	53	8e-110
c11130_g1_i2	c11130_g1_i2|m.8454	1.82	gi|642930100|ref|XP_008196251.1|PREDICTED: putative epidermal cell surface receptor isoform X2 [Tribolium castaneum]	63.58	0
c11131_g2_i1	c11131_g2_i1|m.8456	3.69	gi|270010664|gb|EFA07112.1|hypothetical protein TcasGA2_TC010102 [Tribolium castaneum]	91.35	0
c11131_g2_i1	c11131_g2_i1|m.8457	3.69	gi|189239598|ref|XP_967831.2|PREDICTED: CAAX prenyl protease 2 [Tribolium castaneum]	64.11	2e-135
c11131_g2_i2	c11131_g2_i2|m.8459	2.29	gi|270010664|gb|EFA07112.1|hypothetical protein TcasGA2_TC010102 [Tribolium castaneum]	91.35	0
c11132_g2_i1	c11132_g2_i1|m.8461	2.13	gi|546681790|gb|ERL91816.1|hypothetical protein D910_09141 [Dendroctonus ponderosae]	50.68	3e-16
c11132_g2_i3	c11132_g2_i3|m.8462	3.94	gi|642923256|ref|XP_971150.3|PREDICTED: DNA repair protein XRCC3-like isoform X2 [Tribolium castaneum]	52.21	9e-90
c11133_g1_i1	c11133_g1_i1|m.8463	12.19	gi|642937410|ref|XP_008198824.1|PREDICTED: putative 1-acyl-sn-glycerol-3-phosphate acyltransferase acl-2 [Tribolium castaneum]	59.45	4e-109
c11133_g1_i2	c11133_g1_i2|m.8464	13.9	gi|642937410|ref|XP_008198824.1|PREDICTED: putative 1-acyl-sn-glycerol-3-phosphate acyltransferase acl-2 [Tribolium castaneum]	59.45	4e-109
c11133_g1_i3	c11133_g1_i3|m.8465	13.42	gi|642937410|ref|XP_008198824.1|PREDICTED: putative 1-acyl-sn-glycerol-3-phosphate acyltransferase acl-2 [Tribolium castaneum]	59.45	4e-109
c11134_g1_i1	c11134_g1_i1|m.8466	6.16	gi|91088567|ref|XP_973009.1|PREDICTED: inositol polyphosphate multikinase [Tribolium castaneum]	52.55	4e-43
c11134_g1_i2	c11134_g1_i2|m.8467	7.04	gi|328789801|ref|XP_001120810.2|PREDICTED: uncharacterized protein LOC724909 isoform X1 [Apis mellifera]	50.85	1e-06
c11135_g1_i1	c11135_g1_i1|m.8468	247.29	gi|91075966|ref|XP_969306.1|PREDICTED: electron transfer flavoprotein subunit alpha, mitochondrial [Tribolium castaneum]	79.82	0
c11136_g1_i1	c11136_g1_i1|m.8469	0.98	gi|642919931|ref|XP_974732.3|PREDICTED: tetratricopeptide repeat protein 5-like [Tribolium castaneum]	65.32	3e-152
c11136_g1_i2	c11136_g1_i2|m.8470	2.67	gi|642919931|ref|XP_974732.3|PREDICTED: tetratricopeptide repeat protein 5-like [Tribolium castaneum]	66.9	0
c11136_g1_i2	c11136_g1_i2|m.8471	2.67	gi|167234455|ref|NP_001107843.1|torso-like protein precursor [Tribolium castaneum]	67.82	5e-177
c11136_g1_i3	c11136_g1_i3|m.8472	0.97	gi|642919931|ref|XP_974732.3|PREDICTED: tetratricopeptide repeat protein 5-like [Tribolium castaneum]	66.75	0
c11137_g1_i1	c11137_g1_i1|m.8473	2.06	gi|642919913|ref|XP_008192122.1|PREDICTED: transcription factor SOX-13 [Tribolium castaneum]	68.48	0
c11137_g1_i2	c11137_g1_i2|m.8474	2.2	gi|642919913|ref|XP_008192122.1|PREDICTED: transcription factor SOX-13 [Tribolium castaneum]	68.29	0
c11140_g1_i1	c11140_g1_i1|m.8477	2.88	gi|751210915|ref|XP_011158177.1|PREDICTED: ubiquinone biosynthesis protein COQ7 homolog [Solenopsis invicta]	83.93	1e-102
c11140_g1_i2	c11140_g1_i2|m.8478	3.99	gi|751210915|ref|XP_011158177.1|PREDICTED: ubiquinone biosynthesis protein COQ7 homolog [Solenopsis invicta]	83.93	1e-102
c11142_g1_i1	c11142_g1_i1|m.8481	26.32	gi|91080935|ref|XP_974194.1|PREDICTED: CD9 antigen [Tribolium castaneum]	62.1	1e-117
c11143_g1_i1	c11143_g1_i1|m.8482	6.38	gi|91086897|ref|XP_970798.1|PREDICTED: kxDL motif-containing protein CG10681 [Tribolium castaneum]	85.29	4e-81
c11144_g1_i1	c11144_g1_i1|m.8483	2.27	gi|642920578|ref|XP_008192471.1|PREDICTED: glucose dehydrogenase [FAD, quinone]-like [Tribolium castaneum]	62.04	7e-41
c11145_g1_i1	c11145_g1_i1|m.8484	10.24	gi|478249999|gb|ENN70505.1|hypothetical protein YQE_12681, partial [Dendroctonus ponderosae]	54.66	0
c11145_g1_i2	c11145_g1_i2|m.8485	11.16	gi|478249999|gb|ENN70505.1|hypothetical protein YQE_12681, partial [Dendroctonus ponderosae]	54.66	0
c11147_g1_i1	c11147_g1_i1|m.8487	9.16	gi|91094449|ref|XP_966613.1|PREDICTED: 8-oxo-dGDP phosphatase NUDT18 [Tribolium castaneum]	65.57	3e-82
c11147_g2_i1	c11147_g2_i1|m.8489	8.58	gi|91094449|ref|XP_966613.1|PREDICTED: 8-oxo-dGDP phosphatase NUDT18 [Tribolium castaneum]	66.88	2e-70
c11148_g1_i1	c11148_g1_i1|m.8491	49.65	gi|907607738|ref|XP_013113135.1|PREDICTED: NADH-ubiquinone oxidoreductase subunit 8 [Stomoxys calcitrans]	80.37	2e-123
c11149_g1_i1	c11149_g1_i1|m.8492	11.01	gi|91088121|ref|XP_970262.1|PREDICTED: ADP-ribose pyrophosphatase, mitochondrial [Tribolium castaneum]	63.31	6e-126
c11150_g1_i1	c11150_g1_i1|m.8493	41.13	gi|755934405|ref|XP_011314964.1|PREDICTED: methylthioribulose-1-phosphate dehydratase [Fopius arisanus]	80.43	9e-143
c11151_g2_i1	c11151_g2_i1|m.8494	0.97	gi|270010707|gb|EFA07155.1|hypothetical protein TcasGA2_TC010149 [Tribolium castaneum]	95.61	0
c11151_g2_i3	c11151_g2_i3|m.8495	1.02	gi|270010707|gb|EFA07155.1|hypothetical protein TcasGA2_TC010149 [Tribolium castaneum]	95.61	0
c11152_g1_i1	c11152_g1_i1|m.8496	5.97	gi|242015135|ref|XP_002428229.1|Thrombospondin-3 precursor, putative [Pediculus humanus corporis]	53.78	0
c11153_g1_i1	c11153_g1_i1|m.8497	4.43	gi|642918516|ref|XP_008191506.1|PREDICTED: angiopoietin-4 [Tribolium castaneum]	75.14	0
c11154_g1_i1	c11154_g1_i1|m.8498	4.87	gi|189239303|ref|XP_971702.2|PREDICTED: transmembrane protein 222 [Tribolium castaneum]	68.75	8e-81
c11155_g1_i1	c11155_g1_i1|m.8499	19.44	gi|91081125|ref|XP_975535.1|PREDICTED: protein YIPF6 [Tribolium castaneum]	80.09	5e-132
c11156_g1_i1	c11156_g1_i1|m.8500	6.11	gi|91094999|ref|XP_969232.1|PREDICTED: UDP-glucuronic acid decarboxylase 1 isoform X2 [Tribolium castaneum]	75.8	0
c11157_g1_i1	c11157_g1_i1|m.8501	8.05	gi|642932314|ref|XP_008197061.1|PREDICTED: ankyrin repeat and SAM domain-containing protein 4B [Tribolium castaneum]	65.9	0
c11158_g1_i1	c11158_g1_i1|m.8502	2990.73	gi|642925857|ref|XP_008190580.1|PREDICTED: venom acid phosphatase Acph-1 [Tribolium castaneum]	58.86	2e-56
c11158_g1_i1	c11158_g1_i1|m.8503	2990.73	gi|546686647|gb|ERL95780.1|hypothetical protein D910_00294, partial [Dendroctonus ponderosae]	59.24	7e-57
c11159_g1_i1	c11159_g1_i1|m.8504	30.46	gi|642930359|ref|XP_008196365.1|PREDICTED: protein DEK isoform X1 [Tribolium castaneum]	58.44	2e-127
c11160_g2_i1	c11160_g2_i1|m.8505	37.45	gi|91083003|ref|XP_974477.1|PREDICTED: selT-like protein [Tribolium castaneum]	70.47	6e-99
c11162_g1_i1	c11162_g1_i1|m.8507	109.17	gi|769837374|ref|XP_011629867.1|PREDICTED: L-lactate dehydrogenase-like [Pogonomyrmex barbatus]	71.69	1e-177
c11164_g1_i1	c11164_g1_i1|m.8509	61.54	gi|91083597|ref|XP_968968.1|PREDICTED: Golgi reassembly-stacking protein 2 [Tribolium castaneum]	55.2	2e-137
c11166_g1_i1	c11166_g1_i1|m.8511	6.24	gi|478253882|gb|ENN74174.1|hypothetical protein YQE_09147, partial [Dendroctonus ponderosae]	90.04	0
c11166_g1_i2	c11166_g1_i2|m.8512	5.97	gi|478253882|gb|ENN74174.1|hypothetical protein YQE_09147, partial [Dendroctonus ponderosae]	90.04	0
c11167_g1_i1	c11167_g1_i1|m.8513	9.47	gi|189237651|ref|XP_001813448.1|PREDICTED: N-acetylneuraminate lyase-like [Tribolium castaneum]	55.37	7e-115
c11167_g1_i2	c11167_g1_i2|m.8514	5.59	gi|189237651|ref|XP_001813448.1|PREDICTED: N-acetylneuraminate lyase-like [Tribolium castaneum]	55.37	6e-112
c11167_g1_i3	c11167_g1_i3|m.8515	6.57	gi|189237651|ref|XP_001813448.1|PREDICTED: N-acetylneuraminate lyase-like [Tribolium castaneum]	55.37	1e-114
c11168_g1_i1	c11168_g1_i1|m.8516	6.93	gi|332373530|gb|AEE61906.1|unknown [Dendroctonus ponderosae]	80.97	0
c11168_g1_i2	c11168_g1_i2|m.8518	4.78	gi|91085389|ref|XP_966562.1|PREDICTED: solute carrier family 35 member G1 [Tribolium castaneum]	80.41	0
c11168_g1_i2	c11168_g1_i2|m.8519	4.78	gi|332373530|gb|AEE61906.1|unknown [Dendroctonus ponderosae]	80.97	0
c11169_g1_i1	c11169_g1_i1|m.8523	6.93	gi|91078938|ref|XP_973961.1|PREDICTED: transcriptional repressor CTCF [Tribolium castaneum]	77.36	0
c11170_g2_i1	c11170_g2_i1|m.8524	2.73	gi|347966710|ref|XP_001689319.2|AGAP001866-PA [Anopheles gambiae str. PEST]	58.82	4e-08
c11170_g2_i2	c11170_g2_i2|m.8525	2.53	gi|347966710|ref|XP_001689319.2|AGAP001866-PA [Anopheles gambiae str. PEST]	58.82	3e-08
c11171_g1_i1	c11171_g1_i1|m.8526	459.73	gi|817217647|ref|XP_012284744.1|PREDICTED: 14-3-3 protein zeta isoform X2 [Orussus abietinus]	97.92	5e-134
c11171_g1_i2	c11171_g1_i2|m.8527	525.49	gi|752867677|ref|XP_011250876.1|PREDICTED: 14-3-3 protein zeta isoform X3 [Camponotus floridanus]	96.73	4e-172
c11172_g1_i1	c11172_g1_i1|m.8528	26.68	gi|91077286|ref|XP_974471.1|PREDICTED: probable phosphoserine aminotransferase [Tribolium castaneum]	74.38	0
c11173_g1_i1	c11173_g1_i1|m.8529	5.53	gi|332373040|gb|AEE61661.1|unknown [Dendroctonus ponderosae]	77.78	0
c11174_g1_i1	c11174_g1_i1|m.8530	1.72	gi|189237113|ref|XP_971629.2|PREDICTED: xyloside xylosyltransferase 1 [Tribolium castaneum]	54.34	1e-88
c11174_g1_i2	c11174_g1_i2|m.8531	2.6	gi|189237113|ref|XP_971629.2|PREDICTED: xyloside xylosyltransferase 1 [Tribolium castaneum]	56.61	4e-138
c11175_g1_i1	c11175_g1_i1|m.8532	4.4	gi|831481554|ref|XP_012728004.1|PREDICTED: oocyte zinc finger protein XlCOF6.1-like [Fundulus heteroclitus]	50.43	3e-23
c11176_g1_i1	c11176_g1_i1|m.8533	1.92	gi|642924799|ref|XP_008194045.1|PREDICTED: aspartate--tRNA ligase, mitochondrial [Tribolium castaneum]	60.37	0
c11177_g1_i1	c11177_g1_i1|m.8534	10.65	gi|91093179|ref|XP_968242.1|PREDICTED: COP9 signalosome complex subunit 7b isoform X1 [Tribolium castaneum]	72.12	9e-139
c11177_g1_i2	c11177_g1_i2|m.8535	9.91	gi|642934095|ref|XP_008196895.1|PREDICTED: COP9 signalosome complex subunit 7b isoform X3 [Tribolium castaneum]	72.35	1e-133
c11179_g1_i1	c11179_g1_i1|m.8537	7.51	gi|478254767|gb|ENN75004.1|hypothetical protein YQE_08461, partial [Dendroctonus ponderosae]	50.31	3e-92
c11180_g1_i1	c11180_g1_i1|m.8538	225.26	gi|514055711|gb|AGO32658.1|soluble trehalase [Tenebrio molitor]	51.27	0
c11181_g1_i1	c11181_g1_i1|m.8539	4.09	gi|699657020|ref|XP_009897693.1|PREDICTED: phosphatidylinositol N-acetylglucosaminyltransferase subunit Q [Picoides pubescens]	50.29	3e-40
c11182_g1_i1	c11182_g1_i1|m.8540	34.66	gi|913306911|ref|XP_013183914.1|PREDICTED: 1,2-dihydroxy-3-keto-5-methylthiopentene dioxygenase-like [Amyelois transitella]	63.93	8e-83
c11183_g1_i1	c11183_g1_i1|m.8541	12.21	gi|478255622|gb|ENN75834.1|hypothetical protein YQE_07564, partial [Dendroctonus ponderosae]	59.06	0
c11184_g1_i1	c11184_g1_i1|m.8543	28.46	gi|478254741|gb|ENN74978.1|hypothetical protein YQE_08435, partial [Dendroctonus ponderosae]	57.14	6e-12
c11186_g1_i1	c11186_g1_i1|m.8545	15.11	gi|91083559|ref|XP_967044.1|PREDICTED: UPF0568 protein C14orf166 [Tribolium castaneum]	55.51	8e-89
c11188_g1_i1	c11188_g1_i1|m.8548	35.65	gi|91077746|ref|XP_966706.1|PREDICTED: uncharacterized protein LOC655102 [Tribolium castaneum]	67.61	0
c1119_g1_i1	c1119_g1_i1|m.330	9.98	gi|91078200|ref|XP_968428.1|PREDICTED: m7GpppN-mRNA hydrolase [Tribolium castaneum]	66.67	1e-155
c11190_g1_i1	c11190_g1_i1|m.8550	43.58	gi|270004506|gb|EFA00954.1|hypothetical protein TcasGA2_TC003864, partial [Tribolium castaneum]	75.73	4e-53
c11191_g1_i1	c11191_g1_i1|m.8551	9.3	gi|189234829|ref|XP_001811696.1|PREDICTED: protein fem-1 homolog CG6966 isoform X1 [Tribolium castaneum]	82.86	0
c11191_g1_i2	c11191_g1_i2|m.8552	8.9	gi|189234829|ref|XP_001811696.1|PREDICTED: protein fem-1 homolog CG6966 isoform X1 [Tribolium castaneum]	82.06	0
c11193_g1_i1	c11193_g1_i1|m.8554	11.62	gi|478262463|gb|ENN81134.1|hypothetical protein YQE_02502, partial [Dendroctonus ponderosae]	60.73	2e-137
c11193_g1_i2	c11193_g1_i2|m.8555	14.1	gi|303274120|gb|ADM07446.1|Rab32 [Helicoverpa armigera]	78.87	2e-118
c11194_g1_i1	c11194_g1_i1|m.8556	16.54	gi|827546404|ref|XP_012545626.1|PREDICTED: mitochondrial ribosomal protein S12 isoform X1 [Bombyx mori]	87.61	1e-66
c11198_g1_i1	c11198_g1_i1|m.8560	4.05	gi|91077322|ref|XP_974743.1|PREDICTED: pre-mRNA-splicing factor 18 [Tribolium castaneum]	71.26	2e-177
c11198_g1_i2	c11198_g1_i2|m.8561	18.02	gi|91077322|ref|XP_974743.1|PREDICTED: pre-mRNA-splicing factor 18 [Tribolium castaneum]	63.3	3e-72
c11199_g1_i1	c11199_g1_i1|m.8563	6.02	gi|478258396|gb|ENN78499.1|hypothetical protein YQE_05030, partial [Dendroctonus ponderosae]	73.45	2e-56
c11199_g1_i2	c11199_g1_i2|m.8564	6.28	gi|478258396|gb|ENN78499.1|hypothetical protein YQE_05030, partial [Dendroctonus ponderosae]	73.45	5e-56
c11199_g1_i3	c11199_g1_i3|m.8565	10.32	gi|189236212|ref|XP_001812169.1|PREDICTED: serine/arginine-rich splicing factor RSZ21 [Tribolium castaneum]	62.74	4e-61
c11200_g1_i1	c11200_g1_i1|m.8566	11.92	gi|283046726|ref|NP_001164309.1|glutathione peroxidase [Tribolium castaneum]	68.07	2e-75
c11202_g1_i1	c11202_g1_i1|m.8569	7.94	gi|91086287|ref|XP_973437.1|PREDICTED: hydroxymethylglutaryl-CoA synthase 1 [Tribolium castaneum]	69.48	0
c11203_g1_i1	c11203_g1_i1|m.8570	15.22	gi|642936405|ref|XP_008198420.1|PREDICTED: sugar transporter SWEET1 [Tribolium castaneum]	53.36	1e-76
c11205_g1_i1	c11205_g1_i1|m.8572	36.75	gi|91087635|ref|XP_973117.1|PREDICTED: proteasome subunit alpha type-5 [Tribolium castaneum]	90.91	2e-163
c11206_g2_i1	c11206_g2_i1|m.8573	1.87	gi|642935070|ref|XP_008197871.1|PREDICTED: echinoderm microtubule-associated protein-like CG42247 [Tribolium castaneum]	88.66	0
c11207_g1_i1	c11207_g1_i1|m.8574	8.55	gi|646711870|gb|KDR16900.1|Epoxide hydrolase 4 [Zootermopsis nevadensis]	53.09	1e-151
c11208_g1_i1	c11208_g1_i1|m.8575	29.83	gi|642912660|ref|XP_008200953.1|PREDICTED: aldose reductase-like [Tribolium castaneum]	64.05	1e-150
c11210_g2_i1	c11210_g2_i1|m.8577	3.77	gi|270006951|gb|EFA03399.1|hypothetical protein TcasGA2_TC013385 [Tribolium castaneum]	71.47	3e-169
c11211_g1_i1	c11211_g1_i1|m.8578	18.58	gi|91087269|ref|XP_975538.1|PREDICTED: acyl-CoA synthetase family member 3, mitochondrial [Tribolium castaneum]	53.21	0
c11212_g1_i1	c11212_g1_i1|m.8579	2.1	gi|91088131|ref|XP_975884.1|PREDICTED: cytochrome b5-related protein [Tribolium castaneum]	60.96	0
c11212_g1_i2	c11212_g1_i2|m.8580	0.69	gi|91088131|ref|XP_975884.1|PREDICTED: cytochrome b5-related protein [Tribolium castaneum]	63.16	3e-47
c11213_g1_i1	c11213_g1_i1|m.8581	14.05	gi|642921099|ref|XP_008192690.1|PREDICTED: toll-interacting protein isoform X2 [Tribolium castaneum]	71.06	5e-136
c11213_g1_i2	c11213_g1_i2|m.8582	13.57	gi|642921099|ref|XP_008192690.1|PREDICTED: toll-interacting protein isoform X2 [Tribolium castaneum]	71.06	1e-135
c11214_g2_i1	c11214_g2_i1|m.8583	2.31	gi|91090986|ref|XP_974863.1|PREDICTED: ubiquitin thioesterase trabid [Tribolium castaneum]	78.14	0
c11214_g2_i2	c11214_g2_i2|m.8585	2.48	gi|91090986|ref|XP_974863.1|PREDICTED: ubiquitin thioesterase trabid [Tribolium castaneum]	78.14	0
c11216_g1_i1	c11216_g1_i1|m.8588	76.61	gi|189235224|ref|XP_967725.2|PREDICTED: coatomer subunit delta [Tribolium castaneum]	81.68	0
c11217_g1_i1	c11217_g1_i1|m.8589	7.22	gi|607362058|gb|EZA56318.1|putative serine hydrolase, partial [Cerapachys biroi]	54.22	1e-22
c11218_g1_i1	c11218_g1_i1|m.8590	1.58	gi|675374960|gb|KFM67862.1|Inhibitor of nuclear factor kappa-B kinase subunit beta, partial [Stegodyphus mimosarum]	50.2	6e-73
c11219_g1_i1	c11219_g1_i1|m.8591	10.48	gi|642934414|ref|XP_008197651.1|PREDICTED: transformer-2 protein homolog beta isoform X2 [Tribolium castaneum]	90.08	7e-73
c11219_g1_i2	c11219_g1_i2|m.8592	7.85	gi|649572225|ref|NP_001280513.1|transformer-2 protein homolog beta [Tribolium castaneum]	77.6	6e-80
c11219_g1_i3	c11219_g1_i3|m.8593	9.52	gi|642934414|ref|XP_008197651.1|PREDICTED: transformer-2 protein homolog beta isoform X2 [Tribolium castaneum]	90.08	1e-72
c11219_g1_i5	c11219_g1_i5|m.8594	10.17	gi|642934416|ref|XP_008197652.1|PREDICTED: transformer-2 protein homolog beta isoform X3 [Tribolium castaneum]	90.08	2e-72
c11219_g1_i6	c11219_g1_i6|m.8595	6.74	gi|649572225|ref|NP_001280513.1|transformer-2 protein homolog beta [Tribolium castaneum]	77.6	9e-80
c11221_g1_i1	c11221_g1_i1|m.8599	3.03	gi|642914286|ref|XP_008201622.1|PREDICTED: CCR4-NOT transcription complex subunit 6-like isoform X2 [Tribolium castaneum]	84.92	0
c11221_g1_i2	c11221_g1_i2|m.8600	2.37	gi|642914286|ref|XP_008201622.1|PREDICTED: CCR4-NOT transcription complex subunit 6-like isoform X2 [Tribolium castaneum]	83.24	0
c11221_g1_i3	c11221_g1_i3|m.8601	1.85	gi|642914286|ref|XP_008201622.1|PREDICTED: CCR4-NOT transcription complex subunit 6-like isoform X2 [Tribolium castaneum]	79.27	1e-92
c11222_g1_i1	c11222_g1_i1|m.8602	56.12	gi|913318002|ref|XP_013190011.1|PREDICTED: X-box-binding protein 1 [Amyelois transitella]	55.24	8e-26
c11222_g1_i2	c11222_g1_i2|m.8604	65.16	gi|642936658|ref|XP_973680.2|PREDICTED: LOW QUALITY PROTEIN: uncharacterized protein LOC662495 [Tribolium castaneum]	58.67	8e-43
c11223_g1_i1	c11223_g1_i1|m.8605	2.87	gi|91091516|ref|XP_969603.1|PREDICTED: DNA replication licensing factor Mcm6 [Tribolium castaneum]	84.08	0
c11224_g1_i1	c11224_g1_i1|m.8607	26.64	gi|270009349|gb|EFA05797.1|hypothetical protein TcasGA2_TC030588 [Tribolium castaneum]	56.19	7e-71
c11224_g1_i1	c11224_g1_i1|m.8608	26.64	gi|270009349|gb|EFA05797.1|hypothetical protein TcasGA2_TC030588 [Tribolium castaneum]	78.52	8e-77
c11224_g1_i2	c11224_g1_i2|m.8609	32.32	gi|270009349|gb|EFA05797.1|hypothetical protein TcasGA2_TC030588 [Tribolium castaneum]	66.11	5e-173
c11225_g1_i1	c11225_g1_i1|m.8610	18.63	gi|91082969|ref|XP_973818.1|PREDICTED: ubiquitin-conjugating enzyme E2 J2 [Tribolium castaneum]	70.67	8e-119
c11227_g1_i1	c11227_g1_i1|m.8611	17.03	gi|646702398|gb|KDR11610.1|GTP-binding protein Rheb-like protein [Zootermopsis nevadensis]	84.62	5e-112
c11229_g1_i1	c11229_g1_i1|m.8614	83.64	gi|91085773|ref|XP_974282.1|PREDICTED: uncharacterized protein LOC663129 [Tribolium castaneum]	74.94	0
c11230_g1_i1	c11230_g1_i1|m.8615	3.5	gi|642935689|ref|XP_974835.2|PREDICTED: actin-binding protein IPP [Tribolium castaneum]	63.67	0
c11232_g1_i1	c11232_g1_i1|m.8619	2.6	gi|642927522|ref|XP_008195302.1|PREDICTED: cysteine-rich protein 2-binding protein [Tribolium castaneum]	55.15	0
c11233_g1_i1	c11233_g1_i1|m.8620	3.07	gi|270001490|gb|EEZ97937.1|hypothetical protein TcasGA2_TC000326 [Tribolium castaneum]	57.18	3e-124
c11233_g2_i1	c11233_g2_i1|m.8621	7.52	gi|189234816|ref|XP_969892.2|PREDICTED: probable nucleoporin Nup54 [Tribolium castaneum]	51.89	0
c11234_g1_i1	c11234_g1_i1|m.8623	1.39	gi|642935919|ref|XP_008198229.1|PREDICTED: dual specificity protein phosphatase Mpk3 isoform X2 [Tribolium castaneum]	79.77	0
c11234_g1_i2	c11234_g1_i2|m.8626	1.37	gi|642935919|ref|XP_008198229.1|PREDICTED: dual specificity protein phosphatase Mpk3 isoform X2 [Tribolium castaneum]	79.77	0
c11235_g1_i1	c11235_g1_i1|m.8629	59.6	gi|91093044|ref|XP_966517.1|PREDICTED: lysosomal aspartic protease [Tribolium castaneum]	77.57	0
c11237_g2_i1	c11237_g2_i1|m.8631	13.17	gi|270006374|gb|EFA02822.1|cytochrome P450 6BQ8 [Tribolium castaneum]	57.43	2e-32
c11238_g1_i1	c11238_g1_i1|m.8633	20.69	gi|642939323|ref|XP_969087.2|PREDICTED: aminoacyl tRNA synthase complex-interacting multifunctional protein 1 isoform X1 [Tribolium castaneum]	57.63	1e-108
c11238_g1_i2	c11238_g1_i2|m.8634	22.67	gi|642939325|ref|XP_008200405.1|PREDICTED: aminoacyl tRNA synthase complex-interacting multifunctional protein 1 isoform X2 [Tribolium castaneum]	59.09	5e-108
c11239_g1_i1	c11239_g1_i1|m.8635	2.5	gi|91092640|ref|XP_969145.1|PREDICTED: lysine-specific demethylase 7B [Tribolium castaneum]	66.13	0
c11241_g1_i1	c11241_g1_i1|m.8637	6.11	gi|817189209|ref|XP_012289204.1|PREDICTED: alpha-tocopherol transfer protein-like isoform X2 [Orussus abietinus]	71.95	7e-166
c11242_g1_i1	c11242_g1_i1|m.8638	2.45	gi|642933496|ref|XP_974029.2|PREDICTED: rho GTPase-activating protein 20-like isoform X1 [Tribolium castaneum]	78.79	0
c11244_g1_i1	c11244_g1_i1|m.8640	1.62	gi|861615072|gb|KMQ86016.1|claspin-like protein [Lasius niger]	50.43	5e-39
c11244_g1_i1	c11244_g1_i1|m.8641	1.62	gi|322787307|gb|EFZ13439.1|hypothetical protein SINV_03634, partial [Solenopsis invicta]	50	3e-06
c11245_g1_i1	c11245_g1_i1|m.8642	36.9	gi|91083703|ref|XP_969630.1|PREDICTED: monocarboxylate transporter 5 [Tribolium castaneum]	62.69	0
c11247_g1_i1	c11247_g1_i1|m.8644	4.67	gi|91082001|ref|XP_969328.1|PREDICTED: vacuolar protein sorting-associated protein 37A [Tribolium castaneum]	56.64	5e-123
c11248_g1_i1	c11248_g1_i1|m.8645	3.69	gi|642932777|ref|XP_008196979.1|PREDICTED: dual 3',5'-cyclic-AMP and -GMP phosphodiesterase 11 isoform X3 [Tribolium castaneum]	84.16	0
c11248_g1_i2	c11248_g1_i2|m.8646	3.67	gi|642932773|ref|XP_008196977.1|PREDICTED: dual 3',5'-cyclic-AMP and -GMP phosphodiesterase 11 isoform X1 [Tribolium castaneum]	83.47	0
c11250_g1_i1	c11250_g1_i1|m.8648	3.78	gi|91076900|ref|XP_975025.1|PREDICTED: Y+L amino acid transporter 2 [Tribolium castaneum]	75.17	0
c11251_g1_i1	c11251_g1_i1|m.8649	19.29	gi|668447779|gb|KFB37519.1|AGAP011148-PA-like protein [Anopheles sinensis]	78	5e-78
c11252_g1_i1	c11252_g1_i1|m.8650	48.16	gi|91083827|ref|XP_976102.1|PREDICTED: growth hormone-inducible transmembrane protein [Tribolium castaneum]	70.15	8e-160
c11253_g1_i1	c11253_g1_i1|m.8651	27.55	gi|255522801|ref|NP_001157313.1|longitudinals lacking isoform 4 [Tribolium castaneum]	79.21	0
c11253_g1_i2	c11253_g1_i2|m.8652	45.17	gi|255522809|ref|NP_001157317.1|longitudinals lacking isoform 8 [Tribolium castaneum]	72.64	0
c11254_g1_i1	c11254_g1_i1|m.8653	3.65	gi|478257951|gb|ENN78089.1|hypothetical protein YQE_05243, partial [Dendroctonus ponderosae]	55.2	2e-87
c11254_g1_i2	c11254_g1_i2|m.8655	3.53	gi|478257951|gb|ENN78089.1|hypothetical protein YQE_05243, partial [Dendroctonus ponderosae]	55.2	2e-87
c11255_g1_i1	c11255_g1_i1|m.8657	27.8	gi|642929021|ref|XP_008195658.1|PREDICTED: RNA-binding protein Nova-1 isoform X1 [Tribolium castaneum]	85.66	0
c11256_g1_i1	c11256_g1_i1|m.8658	31.42	gi|91091908|ref|XP_966621.1|PREDICTED: ribosome production factor 2 homolog [Tribolium castaneum]	69.02	5e-152
c11257_g1_i1	c11257_g1_i1|m.8660	4.74	gi|91077428|ref|XP_975436.1|PREDICTED: tRNA (adenine(58)-N(1))-methyltransferase catalytic subunit TRMT61A [Tribolium castaneum]	72.44	7e-171
c11259_g1_i1	c11259_g1_i1|m.8661	1.59	gi|910353425|ref|XP_013180718.1|PREDICTED: ribonuclease P/MRP protein subunit POP5 [Papilio xuthus]	50	3e-43
c11259_g1_i2	c11259_g1_i2|m.8662	2.37	gi|768410727|ref|XP_011559902.1|PREDICTED: ribonuclease P/MRP protein subunit POP5 [Plutella xylostella]	53.39	6e-40
c11259_g2_i1	c11259_g2_i1|m.8664	1.96	gi|91090686|ref|XP_974615.1|PREDICTED: FGGY carbohydrate kinase domain-containing protein [Tribolium castaneum]	67.72	3e-51
c11259_g2_i2	c11259_g2_i2|m.8665	4.22	gi|91090686|ref|XP_974615.1|PREDICTED: FGGY carbohydrate kinase domain-containing protein [Tribolium castaneum]	70.72	7e-173
c11259_g2_i2	c11259_g2_i2|m.8666	4.22	gi|91090686|ref|XP_974615.1|PREDICTED: FGGY carbohydrate kinase domain-containing protein [Tribolium castaneum]	68.89	2e-81
c11261_g1_i1	c11261_g1_i1|m.8668	4.47	gi|270001944|gb|EEZ98391.1|hypothetical protein TcasGA2_TC000855 [Tribolium castaneum]	86.43	0
c11261_g1_i2	c11261_g1_i2|m.8670	3.87	gi|642913071|ref|XP_008201377.1|PREDICTED: disks large 1 tumor suppressor protein isoform X1 [Tribolium castaneum]	86.5	0
c11261_g1_i3	c11261_g1_i3|m.8672	4.04	gi|270001944|gb|EEZ98391.1|hypothetical protein TcasGA2_TC000855 [Tribolium castaneum]	86.43	0
c11261_g1_i4	c11261_g1_i4|m.8674	3.58	gi|642913071|ref|XP_008201377.1|PREDICTED: disks large 1 tumor suppressor protein isoform X1 [Tribolium castaneum]	83.27	0
c11261_g1_i5	c11261_g1_i5|m.8675	3.46	gi|642913079|ref|XP_008201381.1|PREDICTED: disks large 1 tumor suppressor protein isoform X5 [Tribolium castaneum]	84.43	0
c11261_g1_i6	c11261_g1_i6|m.8676	3.48	gi|642913079|ref|XP_008201381.1|PREDICTED: disks large 1 tumor suppressor protein isoform X5 [Tribolium castaneum]	87.79	0
c11261_g1_i7	c11261_g1_i7|m.8677	3.85	gi|642913075|ref|XP_008201379.1|PREDICTED: disks large 1 tumor suppressor protein isoform X3 [Tribolium castaneum]	86.67	0
c11262_g1_i1	c11262_g1_i1|m.8679	319.43	gi|906471862|gb|KNC32099.1|hypothetical protein FF38_00015, partial [Lucilia cuprina]	71.12	1e-115
c11263_g1_i1	c11263_g1_i1|m.8680	42.27	gi|91093675|ref|XP_969585.1|PREDICTED: traB domain-containing protein [Tribolium castaneum]	60.64	7e-164
c11264_g1_i1	c11264_g1_i1|m.8681	26.59	gi|646720358|gb|KDR22116.1|Plexin domain-containing protein 2 [Zootermopsis nevadensis]	55.07	3e-177
c11265_g1_i1	c11265_g1_i1|m.8682	23.18	gi|91085199|ref|XP_971915.1|PREDICTED: vacuolar protein sorting-associated protein 37B [Tribolium castaneum]	55.79	4e-86
c11266_g1_i1	c11266_g1_i1|m.8684	3.47	gi|91082921|ref|XP_972710.1|PREDICTED: annulin [Tribolium castaneum]	66.35	0
c11267_g1_i1	c11267_g1_i1|m.8685	12.3	gi|642911949|ref|XP_008199034.1|PREDICTED: phospholipid scramblase 2 isoform X2 [Tribolium castaneum]	86.75	7e-151
c11267_g1_i3	c11267_g1_i3|m.8686	9.07	gi|642911949|ref|XP_008199034.1|PREDICTED: phospholipid scramblase 2 isoform X2 [Tribolium castaneum]	86.75	2e-152
c11268_g1_i1	c11268_g1_i1|m.8687	9.72	gi|642925318|ref|XP_008194505.1|PREDICTED: microtubule-associated proteins 1A/1B light chain 3C-like [Tribolium castaneum]	71.96	8e-50
c11268_g1_i2	c11268_g1_i2|m.8690	6.29	gi|242014569|ref|XP_002427959.1|microtubule-associated proteins 1A/1B light chain, putative [Pediculus humanus corporis]	73.74	5e-47
c11270_g1_i1	c11270_g1_i1|m.8692	3.37	gi|91076698|ref|XP_971949.1|PREDICTED: dipeptidyl peptidase 9 [Tribolium castaneum]	84.6	0
c11270_g1_i2	c11270_g1_i2|m.8693	3.85	gi|91076698|ref|XP_971949.1|PREDICTED: dipeptidyl peptidase 9 [Tribolium castaneum]	85.11	0
c11271_g1_i1	c11271_g1_i1|m.8694	5.86	gi|170030475|ref|XP_001843114.1|ribosomal RNA large subunit methyltransferase J [Culex quinquefasciatus]	57.48	4e-47
c11271_g1_i1	c11271_g1_i1|m.8695	5.86	gi|91093471|ref|XP_967620.1|PREDICTED: ubiquitin-like protein 4B [Tribolium castaneum]	52.46	3e-44
c11271_g1_i2	c11271_g1_i2|m.8696	5.69	gi|270012568|gb|EFA09016.1|hypothetical protein TcasGA2_TC006724 [Tribolium castaneum]	67.76	3e-103
c11271_g1_i2	c11271_g1_i2|m.8697	5.69	gi|91093471|ref|XP_967620.1|PREDICTED: ubiquitin-like protein 4B [Tribolium castaneum]	52.46	3e-44
c11272_g1_i1	c11272_g1_i1|m.8698	2.04	gi|270006116|gb|EFA02564.1|hypothetical protein TcasGA2_TC008273 [Tribolium castaneum]	78.49	3e-145
c11272_g1_i2	c11272_g1_i2|m.8699	3.2	gi|642920784|ref|XP_008192559.1|PREDICTED: choline/ethanolaminephosphotransferase 1 isoform X2 [Tribolium castaneum]	81.85	0
c11272_g1_i4	c11272_g1_i4|m.8700	5.06	gi|270006116|gb|EFA02564.1|hypothetical protein TcasGA2_TC008273 [Tribolium castaneum]	76.23	0
c11274_g1_i1	c11274_g1_i1|m.8701	11.37	gi|642918448|ref|XP_008191479.1|PREDICTED: probable deoxyhypusine synthase [Tribolium castaneum]	74.34	0
c11275_g1_i1	c11275_g1_i1|m.8702	59.63	gi|383850214|ref|XP_003700691.1|PREDICTED: bystin [Megachile rotundata]	69.46	0
c11276_g1_i1	c11276_g1_i1|m.8703	5.08	gi|752882779|ref|XP_011259061.1|PREDICTED: target of rapamycin complex subunit lst8 [Camponotus floridanus]	71.92	3e-177
c11277_g1_i1	c11277_g1_i1|m.8704	1.89	gi|156358256|ref|XP_001624438.1|predicted protein [Nematostella vectensis]	50.59	8e-16
c11277_g1_i2	c11277_g1_i2|m.8705	2.45	gi|646719030|gb|KDR21289.1|O-phosphoseryl-tRNA(Sec) selenium transferase [Zootermopsis nevadensis]	54.43	0
c11277_g1_i3	c11277_g1_i3|m.8706	0.72	gi|156358256|ref|XP_001624438.1|predicted protein [Nematostella vectensis]	50.59	6e-16
c11278_g1_i1	c11278_g1_i1|m.8707	36.93	gi|91088885|ref|XP_972389.1|PREDICTED: 26S protease regulatory subunit 7 [Tribolium castaneum]	97.7	0
c11280_g1_i1	c11280_g1_i1|m.8710	9.97	gi|270001355|gb|EEZ97802.1|hypothetical protein TcasGA2_TC000164 [Tribolium castaneum]	68.78	0
c11281_g1_i1	c11281_g1_i1|m.8711	4.01	gi|270001368|gb|EEZ97815.1|hypothetical protein TcasGA2_TC000182 [Tribolium castaneum]	80.38	0
c11281_g1_i2	c11281_g1_i2|m.8712	4.02	gi|270001368|gb|EEZ97815.1|hypothetical protein TcasGA2_TC000182 [Tribolium castaneum]	80.99	0
c11282_g1_i1	c11282_g1_i1|m.8713	7	gi|91087581|ref|XP_971751.1|PREDICTED: peroxisomal membrane protein PMP34 [Tribolium castaneum]	58.1	3e-113
c11282_g1_i2	c11282_g1_i2|m.8714	8.42	gi|91087581|ref|XP_971751.1|PREDICTED: peroxisomal membrane protein PMP34 [Tribolium castaneum]	58.1	3e-113
c11284_g1_i1	c11284_g1_i1|m.8715	27.98	gi|861651512|gb|KMQ97842.1|arrestin-like protein [Lasius niger]	73.12	0
c11285_g1_i1	c11285_g1_i1|m.8716	2.63	gi|815919496|ref|XP_012244726.1|PREDICTED: uncharacterized protein LOC100748303 [Bombus impatiens]	53.25	1e-13
c11285_g1_i3	c11285_g1_i3|m.8717	2.54	gi|736208190|ref|XP_010776440.1|PREDICTED: RNA-binding protein 33 [Notothenia coriiceps]	66.67	5e-06
c11286_g1_i1	c11286_g1_i1|m.8718	1.18	gi|642920145|ref|XP_975475.2|PREDICTED: zinc transporter 9 isoform X1 [Tribolium castaneum]	78.64	0
c11286_g1_i2	c11286_g1_i2|m.8720	1.24	gi|642920145|ref|XP_975475.2|PREDICTED: zinc transporter 9 isoform X1 [Tribolium castaneum]	79.26	0
c11286_g1_i3	c11286_g1_i3|m.8722	1.1	gi|642920145|ref|XP_975475.2|PREDICTED: zinc transporter 9 isoform X1 [Tribolium castaneum]	68.78	6e-78
c11286_g1_i3	c11286_g1_i3|m.8723	1.1	gi|546677295|gb|ERL88156.1|hypothetical protein D910_05544 [Dendroctonus ponderosae]	85.81	0
c11287_g1_i1	c11287_g1_i1|m.8725	35.06	gi|189235713|ref|XP_968592.2|PREDICTED: uncharacterized protein LOC657010 [Tribolium castaneum]	76.34	4e-135
c11288_g1_i1	c11288_g1_i1|m.8726	5.52	gi|189234234|ref|XP_973284.2|PREDICTED: phosphatidylserine decarboxylase proenzyme isoform X2 [Tribolium castaneum]	64.31	1e-167
c11289_g1_i1	c11289_g1_i1|m.8727	339.68	gi|270008946|gb|EFA05394.1|hypothetical protein TcasGA2_TC015566 [Tribolium castaneum]	50	1e-137
c11290_g1_i1	c11290_g1_i1|m.8729	48.48	gi|91094297|ref|XP_971720.1|PREDICTED: estradiol 17-beta-dehydrogenase 12 [Tribolium castaneum]	57.33	2e-130
c11292_g1_i1	c11292_g1_i1|m.8731	16.81	gi|189234289|ref|XP_970161.2|PREDICTED: mitochondrial pyruvate carrier 2-like [Tribolium castaneum]	70.09	3e-53
c11293_g1_i1	c11293_g1_i1|m.8732	7.12	gi|642936649|ref|XP_008198523.1|PREDICTED: 3-oxoacyl-[acyl-carrier-protein] synthase, mitochondrial [Tribolium castaneum]	69.86	0
c11295_g1_i1	c11295_g1_i1|m.8733	8.24	gi|91080441|ref|XP_969036.1|PREDICTED: uncharacterized protein LOC657485 [Tribolium castaneum]	80.99	7e-146
c11296_g1_i1	c11296_g1_i1|m.8734	14.82	gi|449083364|ref|NP_001263355.1|dehydrogenase/reductase SDR family member 4 [Tribolium castaneum]	65.87	1e-112
c11296_g1_i1	c11296_g1_i1|m.8735	14.82	gi|642915569|ref|XP_008190670.1|PREDICTED: TP53-regulating kinase [Tribolium castaneum]	60	2e-94
c11297_g1_i1	c11297_g1_i1|m.8736	5.28	gi|642927957|ref|XP_008195462.1|PREDICTED: transcriptional adapter 2B [Tribolium castaneum]	66.3	0
c11297_g1_i2	c11297_g1_i2|m.8737	5.18	gi|642927957|ref|XP_008195462.1|PREDICTED: transcriptional adapter 2B [Tribolium castaneum]	72.12	8e-171
c11297_g1_i2	c11297_g1_i2|m.8738	5.18	gi|642927957|ref|XP_008195462.1|PREDICTED: transcriptional adapter 2B [Tribolium castaneum]	59.38	3e-26
c11298_g1_i1	c11298_g1_i1|m.8739	65.45	gi|642922646|ref|XP_971397.2|PREDICTED: Krueppel-like factor 11 [Tribolium castaneum]	56.79	8e-112
c11299_g1_i1	c11299_g1_i1|m.8740	2.47	gi|642916684|ref|XP_008192148.1|PREDICTED: protein tramtrack, alpha isoform isoform X3 [Tribolium castaneum]	52.73	3e-95
c11299_g1_i2	c11299_g1_i2|m.8741	3.12	gi|642916682|ref|XP_008192144.1|PREDICTED: protein tramtrack, alpha isoform isoform X2 [Tribolium castaneum]	73.72	0
c11300_g1_i1	c11300_g1_i1|m.8742	4.47	gi|642930416|ref|XP_008196392.1|PREDICTED: stAR-related lipid transfer protein 3 [Tribolium castaneum]	60.47	0
c11301_g1_i1	c11301_g1_i1|m.8743	2.01	gi|546673600|gb|ERL85164.1|hypothetical protein D910_02586 [Dendroctonus ponderosae]	70.6	0
c11301_g1_i2	c11301_g1_i2|m.8744	1.96	gi|546673600|gb|ERL85164.1|hypothetical protein D910_02586 [Dendroctonus ponderosae]	70.6	0
c11302_g1_i1	c11302_g1_i1|m.8745	82.76	gi|91078256|ref|XP_970842.1|PREDICTED: importin-7 [Tribolium castaneum]	79.9	0
c11304_g1_i1	c11304_g1_i1|m.8749	10.74	gi|751203122|ref|XP_011174971.1|PREDICTED: cystinosin homolog isoform X2 [Solenopsis invicta]	51.13	2e-106
c11305_g1_i1	c11305_g1_i1|m.8750	9.14	gi|91078892|ref|XP_973256.1|PREDICTED: enoyl-CoA delta isomerase 2, mitochondrial [Tribolium castaneum]	53.31	3e-83
c11308_g1_i1	c11308_g1_i1|m.8754	20.45	gi|91094631|ref|XP_969879.1|PREDICTED: proton-coupled amino acid transporter 1 isoform X1 [Tribolium castaneum]	57.96	0
c11309_g1_i1	c11309_g1_i1|m.8756	6.28	gi|189237997|ref|XP_001812912.1|PREDICTED: dehydrogenase/reductase SDR family protein 7-like [Tribolium castaneum]	58.31	7e-117
c11310_g1_i1	c11310_g1_i1|m.8757	15.2	gi|189239486|ref|XP_976481.2|PREDICTED: protein shisa-5-like isoform X4 [Tribolium castaneum]	58.06	1e-06
c11311_g1_i4	c11311_g1_i4|m.8758	9.47	gi|270001539|gb|EEZ97986.1|hypothetical protein TcasGA2_TC000381 [Tribolium castaneum]	79.27	0
c11311_g1_i5	c11311_g1_i5|m.8759	9.69	gi|270001539|gb|EEZ97986.1|hypothetical protein TcasGA2_TC000381 [Tribolium castaneum]	81.92	0
c11312_g1_i1	c11312_g1_i1|m.8760	14.88	gi|91084415|ref|XP_967749.1|PREDICTED: macrophage migration inhibitory factor homolog [Tribolium castaneum]	71.43	5e-60
c11313_g1_i1	c11313_g1_i1|m.8762	4.21	gi|546678080|gb|ERL88796.1|hypothetical protein D910_06178 [Dendroctonus ponderosae]	82.7	0
c11314_g1_i1	c11314_g1_i1|m.8763	10.89	gi|642913828|ref|XP_008201177.1|PREDICTED: microtubule-associated protein tau isoform X3 [Tribolium castaneum]	71.01	2e-141
c11314_g1_i2	c11314_g1_i2|m.8765	7.95	gi|642913826|ref|XP_008201176.1|PREDICTED: microtubule-associated protein tau isoform X2 [Tribolium castaneum]	75.46	2e-138
c11315_g1_i1	c11315_g1_i1|m.8767	15.55	gi|478263632|gb|ENN81938.1|hypothetical protein YQE_01649, partial [Dendroctonus ponderosae]	94.49	0
c11316_g1_i1	c11316_g1_i1|m.8768	14.92	gi|642922837|ref|XP_008193347.1|PREDICTED: isocitrate dehydrogenase [NAD] subunit gamma, mitochondrial-like isoform X1 [Tribolium castaneum]	81.59	0
c11316_g1_i2	c11316_g1_i2|m.8770	21.84	gi|642922837|ref|XP_008193347.1|PREDICTED: isocitrate dehydrogenase [NAD] subunit gamma, mitochondrial-like isoform X1 [Tribolium castaneum]	81.77	0
c11317_g1_i1	c11317_g1_i1|m.8772	7.99	gi|91091902|ref|XP_971322.1|PREDICTED: mediator of RNA polymerase II transcription subunit 22 [Tribolium castaneum]	94.29	5e-93
c11318_g1_i1	c11318_g1_i1|m.8773	4.91	gi|189240504|ref|XP_969860.2|PREDICTED: ras-related protein Rab-40B [Tribolium castaneum]	83.56	0
c11319_g1_i2	c11319_g1_i2|m.8774	6.01	gi|642928866|ref|XP_008195596.1|PREDICTED: protein EFR3 homolog cmp44E [Tribolium castaneum]	78.43	0
c11320_g1_i1	c11320_g1_i1|m.8775	3.71	gi|189240403|ref|XP_001809051.1|PREDICTED: sialin-like isoform X2 [Tribolium castaneum]	54.75	2e-98
c11320_g1_i1	c11320_g1_i1|m.8776	3.71	gi|270012476|gb|EFA08924.1|hypothetical protein TcasGA2_TC006631 [Tribolium castaneum]	65.43	3e-86
c11321_g1_i1	c11321_g1_i1|m.8778	3.41	gi|270012856|gb|EFA09304.1|hypothetical protein TcasGA2_TC030611 [Tribolium castaneum]	59.63	4e-89
c11322_g1_i1	c11322_g1_i1|m.8779	3.87	gi|646695031|gb|KDR08205.1|putative enoyl-CoA hydratase [Zootermopsis nevadensis]	65.33	7e-127
c11323_g1_i1	c11323_g1_i1|m.8780	14.93	gi|91079024|ref|XP_974902.1|PREDICTED: methyltransferase-like protein 10 [Tribolium castaneum]	51.2	3e-70
c11326_g1_i1	c11326_g1_i1|m.8782	3.67	gi|124487902|gb|ABN12034.1|hypothetical protein [Maconellicoccus hirsutus]	53.57	3e-23
c11327_g1_i1	c11327_g1_i1|m.8783	69.85	gi|91076160|ref|XP_966582.1|PREDICTED: ubiquilin-1 [Tribolium castaneum]	69.17	0
c11328_g1_i2	c11328_g1_i2|m.8785	17.57	gi|91083725|ref|XP_967136.1|PREDICTED: actin-binding Rho-activating protein isoform X1 [Tribolium castaneum]	59.76	4e-65
c11329_g1_i1	c11329_g1_i1|m.8786	9.33	gi|270008244|gb|EFA04692.1|budding uninhibited by benzimidazoles 1 [Tribolium castaneum]	52.44	0
c11330_g1_i1	c11330_g1_i1|m.8787	164.08	gi|282158083|ref|NP_001164085.1|cytochrome c oxidase subunit IV [Tribolium castaneum]	64.41	2e-77
c11331_g1_i1	c11331_g1_i1|m.8788	12.11	gi|91089555|ref|XP_971709.1|PREDICTED: uncharacterized protein LOC660380 [Tribolium castaneum]	51.94	2e-34
c11332_g1_i1	c11332_g1_i1|m.8789	19.68	gi|642923827|ref|XP_008193896.1|PREDICTED: endonuclease/exonuclease/phosphatase family domain-containing protein 1-like [Tribolium castaneum]	51.81	0
c11333_g1_i1	c11333_g1_i1|m.8791	16.31	gi|411145887|gb|AFW04603.1|giwi protein [Gampsocleis gratiosa]	55.45	0
c11333_g1_i3	c11333_g1_i3|m.8795	20.56	gi|411145887|gb|AFW04603.1|giwi protein [Gampsocleis gratiosa]	55.45	0
c11334_g1_i1	c11334_g1_i1|m.8797	4.77	gi|270014974|gb|EFA11422.1|hypothetical protein TcasGA2_TC013599 [Tribolium castaneum]	69.62	9e-63
c11335_g1_i1	c11335_g1_i1|m.8798	2.84	gi|642934158|ref|XP_968636.2|PREDICTED: elongation of very long chain fatty acids protein AAEL008004 isoform X1 [Tribolium castaneum]	82.05	2e-171
c11335_g1_i2	c11335_g1_i2|m.8799	1.65	gi|642934158|ref|XP_968636.2|PREDICTED: elongation of very long chain fatty acids protein AAEL008004 isoform X1 [Tribolium castaneum]	85.16	6e-114
c11336_g1_i1	c11336_g1_i1|m.8800	17.31	gi|642936390|ref|XP_008198416.1|PREDICTED: LOW QUALITY PROTEIN: protein CNPPD1 [Tribolium castaneum]	51.82	4e-129
c11338_g1_i1	c11338_g1_i1|m.8804	5.42	gi|91095123|ref|XP_970890.1|PREDICTED: dehydrogenase/reductase SDR family member 11 [Tribolium castaneum]	56.81	2e-99
c11338_g1_i2	c11338_g1_i2|m.8805	3.07	gi|270008934|gb|EFA05382.1|hypothetical protein TcasGA2_TC015554 [Tribolium castaneum]	62.11	6e-79
c11339_g1_i1	c11339_g1_i1|m.8806	4.13	gi|270002989|gb|EEZ99436.1|hypothetical protein TcasGA2_TC030620 [Tribolium castaneum]	54.82	1e-55
c11339_g1_i2	c11339_g1_i2|m.8807	5.92	gi|91076706|ref|XP_972155.1|PREDICTED: peroxisome biogenesis factor 10 isoform X1 [Tribolium castaneum]	53.21	5e-103
c1134_g1_i1	c1134_g1_i1|m.333	7.22	gi|91094389|ref|XP_971252.1|PREDICTED: DNA polymerase epsilon subunit C [Tribolium castaneum]	61.11	1e-89
c11340_g1_i1	c11340_g1_i1|m.8808	9.34	gi|913331423|ref|XP_013197285.1|PREDICTED: charged multivesicular body protein 2a [Amyelois transitella]	75.64	3e-123
c11340_g1_i2	c11340_g1_i2|m.8809	9.51	gi|913331423|ref|XP_013197285.1|PREDICTED: charged multivesicular body protein 2a [Amyelois transitella]	75.64	9e-124
c11341_g1_i1	c11341_g1_i1|m.8810	4.69	gi|91086881|ref|XP_970132.1|PREDICTED: RING finger protein 113A [Tribolium castaneum]	70.81	8e-154
c11341_g1_i2	c11341_g1_i2|m.8811	2.47	gi|91086881|ref|XP_970132.1|PREDICTED: RING finger protein 113A [Tribolium castaneum]	78.79	2e-99
c11342_g1_i1	c11342_g1_i1|m.8813	44.75	gi|478253273|gb|ENN73644.1|hypothetical protein YQE_09890, partial [Dendroctonus ponderosae]	58.24	3e-25
c11342_g1_i2	c11342_g1_i2|m.8814	45.95	gi|769836700|ref|XP_011629520.1|PREDICTED: uncharacterized protein LOC105422011 isoform X2 [Pogonomyrmex barbatus]	58.18	1e-09
c11343_g1_i1	c11343_g1_i1|m.8815	117.81	gi|642927761|ref|XP_008195395.1|PREDICTED: ATP synthase-coupling factor 6, mitochondrial [Tribolium castaneum]	65.74	2e-46
c11344_g1_i1	c11344_g1_i1|m.8816	3.09	gi|642911536|ref|XP_008199463.1|PREDICTED: organic cation transporter protein isoform X2 [Tribolium castaneum]	64.24	0
c11345_g1_i1	c11345_g1_i1|m.8818	1.82	gi|642923984|ref|XP_966730.2|PREDICTED: cysteine and histidine-rich protein 1, partial [Tribolium castaneum]	70.07	8e-150
c11345_g1_i2	c11345_g1_i2|m.8820	3.58	gi|817081820|ref|XP_012263443.1|PREDICTED: cysteine and histidine-rich protein 1 homolog [Athalia rosae]	72.91	0
c11345_g1_i3	c11345_g1_i3|m.8822	2.25	gi|270007803|gb|EFA04251.1|hypothetical protein TcasGA2_TC014541 [Tribolium castaneum]	76.24	1e-116
c11345_g1_i3	c11345_g1_i3|m.8823	2.25	gi|546682834|gb|ERL92723.1|hypothetical protein D910_10033 [Dendroctonus ponderosae]	60.53	3e-18
c11346_g1_i1	c11346_g1_i1|m.8825	12.27	gi|91079919|ref|XP_967329.1|PREDICTED: sulfhydryl oxidase 2-like [Tribolium castaneum]	54.34	0
c11346_g1_i2	c11346_g1_i2|m.8826	11.98	gi|270003263|gb|EEZ99710.1|hypothetical protein TcasGA2_TC002471 [Tribolium castaneum]	55.43	0
c11349_g1_i1	c11349_g1_i1|m.8828	3.5	gi|261335952|emb|CBH09285.1|putative thymidylate kinase [Heliconius melpomene]	55.72	7e-72
c11350_g1_i1	c11350_g1_i1|m.8829	9.91	gi|91085999|ref|XP_972435.1|PREDICTED: cAMP-dependent protein kinase type II regulatory subunit [Tribolium castaneum]	83.12	0
c11351_g1_i2	c11351_g1_i2|m.8831	4.08	gi|642939310|ref|XP_008200401.1|PREDICTED: tRNA (guanine(37)-N1)-methyltransferase [Tribolium castaneum]	50.93	2e-141
c11352_g1_i1	c11352_g1_i1|m.8833	6.95	gi|768432174|ref|XP_011557398.1|PREDICTED: aldose reductase-like isoform X1 [Plutella xylostella]	66.84	4e-95
c11354_g2_i1	c11354_g2_i1|m.8835	0.76	gi|642917429|ref|XP_008191194.1|PREDICTED: D-2-hydroxyglutarate dehydrogenase, mitochondrial-like isoform X1 [Tribolium castaneum]	59.64	0
c11354_g2_i2	c11354_g2_i2|m.8838	0.63	gi|546683380|gb|ERL93202.1|hypothetical protein D910_10499 [Dendroctonus ponderosae]	63.28	1e-113
c11354_g2_i2	c11354_g2_i2|m.8839	0.63	gi|642917431|ref|XP_008191195.1|PREDICTED: D-2-hydroxyglutarate dehydrogenase, mitochondrial-like isoform X2 [Tribolium castaneum]	54.3	1e-54
c11354_g3_i1	c11354_g3_i1|m.8836	4.14	gi|642917429|ref|XP_008191194.1|PREDICTED: D-2-hydroxyglutarate dehydrogenase, mitochondrial-like isoform X1 [Tribolium castaneum]	59.83	0
c11358_g1_i1	c11358_g1_i1|m.8843	2.53	gi|91088619|ref|XP_974054.1|PREDICTED: CDP-diacylglycerol--glycerol-3-phosphate 3-phosphatidyltransferase, mitochondrial [Tribolium castaneum]	63.67	3e-141
c11358_g1_i1	c11358_g1_i1|m.8844	2.53	gi|478253635|gb|ENN73939.1|hypothetical protein YQE_09441, partial [Dendroctonus ponderosae]	51.26	3e-31
c11358_g1_i2	c11358_g1_i2|m.8845	2.36	gi|91088619|ref|XP_974054.1|PREDICTED: CDP-diacylglycerol--glycerol-3-phosphate 3-phosphatidyltransferase, mitochondrial [Tribolium castaneum]	59.42	1e-116
c11358_g1_i2	c11358_g1_i2|m.8846	2.36	gi|478253635|gb|ENN73939.1|hypothetical protein YQE_09441, partial [Dendroctonus ponderosae]	56.92	2e-75
c11358_g1_i3	c11358_g1_i3|m.8847	2.78	gi|91088619|ref|XP_974054.1|PREDICTED: CDP-diacylglycerol--glycerol-3-phosphate 3-phosphatidyltransferase, mitochondrial [Tribolium castaneum]	60.72	0
c11359_g1_i1	c11359_g1_i1|m.8848	28.14	gi|642928451|ref|XP_972332.2|PREDICTED: UPF0160 protein [Tribolium castaneum]	59.32	1e-163
c1136_g1_i1	c1136_g1_i1|m.335	0.97	gi|91086011|ref|XP_972761.1|PREDICTED: uncharacterized protein LOC661513 isoform X2 [Tribolium castaneum]	59.4	4e-82
c11360_g1_i1	c11360_g1_i1|m.8849	5.85	gi|328704157|ref|XP_001946821.2|PREDICTED: hepatoma-derived growth factor-related protein 2-like [Acyrthosiphon pisum]	50.63	1e-12
c11361_g1_i1	c11361_g1_i1|m.8850	79.89	gi|91086235|ref|XP_966692.1|PREDICTED: transitional endoplasmic reticulum ATPase TER94 [Tribolium castaneum]	95.52	0
c11362_g1_i1	c11362_g1_i1|m.8851	6.45	gi|91091506|ref|XP_969096.1|PREDICTED: ubiquitin-protein ligase E3A [Tribolium castaneum]	66.55	0
c11362_g1_i1	c11362_g1_i1|m.8852	6.45	gi|91091506|ref|XP_969096.1|PREDICTED: ubiquitin-protein ligase E3A [Tribolium castaneum]	87.15	1e-180
c11363_g1_i1	c11363_g1_i1|m.8853	89.79	gi|751233009|ref|XP_011170156.1|PREDICTED: MICOS complex subunit Mic60-like [Solenopsis invicta]	54.55	1e-90
c11364_g1_i1	c11364_g1_i1|m.8854	16.47	gi|642916102|ref|XP_971729.2|PREDICTED: DDB1- and CUL4-associated factor 11 [Tribolium castaneum]	65.28	0
c11365_g1_i1	c11365_g1_i1|m.8855	33.88	gi|642912785|ref|XP_008201251.1|PREDICTED: uncharacterized protein LOC663557 isoform X1 [Tribolium castaneum]	78.86	0
c11366_g1_i1	c11366_g1_i1|m.8856	35.94	gi|91093645|ref|XP_967622.1|PREDICTED: translation initiation factor eIF-2B subunit beta [Tribolium castaneum]	71.01	1e-177
c11368_g1_i1	c11368_g1_i1|m.8857	2.85	gi|270012533|gb|EFA08981.1|hypothetical protein TcasGA2_TC006688 [Tribolium castaneum]	61.1	0
c11370_g1_i1	c11370_g1_i1|m.8859	7.05	gi|642919719|ref|XP_008192036.1|PREDICTED: glutaredoxin domain-containing cysteine-rich protein CG12206-like [Tribolium castaneum]	55.81	4e-175
c11372_g1_i1	c11372_g1_i1|m.8860	4.33	gi|642920753|ref|XP_008192548.1|PREDICTED: probable asparagine--tRNA ligase, mitochondrial [Tribolium castaneum]	52.55	8e-177
c11373_g1_i1	c11373_g1_i1|m.8861	14.82	gi|642917889|ref|XP_008191371.1|PREDICTED: regulator of chromosome condensation [Tribolium castaneum]	68.76	0
c11375_g1_i1	c11375_g1_i1|m.8863	1.47	gi|270005503|gb|EFA01951.1|hypothetical protein TcasGA2_TC007566 [Tribolium castaneum]	82.93	5e-176
c11375_g1_i2	c11375_g1_i2|m.8864	1.55	gi|642919435|ref|XP_008191868.1|PREDICTED: uncharacterized protein LOC663349 isoform X2 [Tribolium castaneum]	75.42	0
c11376_g1_i1	c11376_g1_i1|m.8865	9.89	gi|642918102|ref|XP_008194021.1|PREDICTED: Krueppel-like factor 5 isoform X1 [Tribolium castaneum]	80.1	0
c11377_g1_i1	c11377_g1_i1|m.8867	2.81	gi|657545934|ref|XP_008278226.1|PREDICTED: tonsoku-like protein [Stegastes partitus]	55.46	1e-33
c11379_g1_i1	c11379_g1_i1|m.8869	29.67	gi|91091136|ref|XP_970146.1|PREDICTED: uncharacterized protein LOC658689 [Tribolium castaneum]	51.91	8e-93
c11380_g1_i1	c11380_g1_i1|m.8870	14.33	gi|91083975|ref|XP_975160.1|PREDICTED: 28S ribosomal protein S22, mitochondrial [Tribolium castaneum]	50.72	1e-120
c11381_g1_i1	c11381_g1_i1|m.8871	3.2	gi|546685214|gb|ERL94741.1|hypothetical protein D910_12015 [Dendroctonus ponderosae]	78.9	1e-48
c11381_g1_i2	c11381_g1_i2|m.8872	13.56	gi|91076148|ref|XP_970492.1|PREDICTED: yorkie homolog isoform X1 [Tribolium castaneum]	72.52	4e-178
c11383_g1_i1	c11383_g1_i1|m.8874	6.36	gi|189237799|ref|XP_001814012.1|PREDICTED: polypeptide N-acetylgalactosaminyltransferase 35A [Tribolium castaneum]	62.66	0
c11384_g1_i1	c11384_g1_i1|m.8875	2.31	gi|642932139|ref|XP_008196871.1|PREDICTED: tachykinins [Tribolium castaneum]	59.03	2e-71
c11386_g1_i1	c11386_g1_i1|m.8877	1.8	gi|642928662|ref|XP_008199726.1|PREDICTED: protein daughterless isoform X3 [Tribolium castaneum]	70.86	0
c11386_g1_i3	c11386_g1_i3|m.8879	1.77	gi|642928662|ref|XP_008199726.1|PREDICTED: protein daughterless isoform X3 [Tribolium castaneum]	74.86	0
c11389_g1_i1	c11389_g1_i1|m.8882	6.37	gi|270002103|gb|EEZ98550.1|hypothetical protein TcasGA2_TC001057 [Tribolium castaneum]	74.58	1e-124
c1139_g1_i1	c1139_g1_i1|m.338	1.56	gi|861641956|gb|KMQ93742.1|otoferlin-like protein [Lasius niger]	82.09	0
c11390_g1_i1	c11390_g1_i1|m.8883	13.2	gi|91084031|ref|XP_966556.1|PREDICTED: WD repeat-containing protein 82 [Tribolium castaneum]	96.52	0
c11391_g1_i1	c11391_g1_i1|m.8885	7.4	gi|91083433|ref|XP_969628.1|PREDICTED: kidney mitochondrial carrier protein 1 [Tribolium castaneum]	78.2	3e-169
c11391_g1_i1	c11391_g1_i1|m.8886	7.4	gi|91083431|ref|XP_969550.1|PREDICTED: membrane magnesium transporter 1 [Tribolium castaneum]	77.78	1e-51
c11391_g1_i2	c11391_g1_i2|m.8887	4.01	gi|91083433|ref|XP_969628.1|PREDICTED: kidney mitochondrial carrier protein 1 [Tribolium castaneum]	78.2	3e-169
c11393_g1_i1	c11393_g1_i1|m.8888	16.45	gi|170041970|ref|XP_001848717.1|peptidoglycan recognition protein [Culex quinquefasciatus]	54.55	3e-61
c11394_g1_i1	c11394_g1_i1|m.8889	13.56	gi|506969239|gb|AGM32963.1|hypothetical protein [Coptotermes formosanus]	50	2e-33
c11396_g1_i1	c11396_g1_i1|m.8891	4.07	gi|189236477|ref|XP_974791.2|PREDICTED: protein kibra isoform X1 [Tribolium castaneum]	69.79	0
c11397_g1_i1	c11397_g1_i1|m.8893	0.96	gi|91077544|ref|XP_971725.1|PREDICTED: tyrosine-protein phosphatase non-receptor type 13-like isoform X1 [Tribolium castaneum]	73.98	0
c11397_g1_i2	c11397_g1_i2|m.8895	0.96	gi|91077544|ref|XP_971725.1|PREDICTED: tyrosine-protein phosphatase non-receptor type 13-like isoform X1 [Tribolium castaneum]	74.06	0
c11398_g1_i1	c11398_g1_i1|m.8897	15.16	gi|642919310|ref|XP_008191820.1|PREDICTED: 28S ribosomal protein S10, mitochondrial [Tribolium castaneum]	65.33	1e-65
c11401_g1_i1	c11401_g1_i1|m.8902	299.5	gi|91085361|ref|XP_971346.1|PREDICTED: zinc carboxypeptidase [Tribolium castaneum]	52.05	3e-137
c11402_g1_i1	c11402_g1_i1|m.8903	2.43	gi|642931756|ref|XP_968911.2|PREDICTED: endonuclease III-like protein 1 [Tribolium castaneum]	60.64	1e-122
c11403_g1_i1	c11403_g1_i1|m.8904	8.13	gi|642910807|ref|XP_008193418.1|PREDICTED: AP-3 complex subunit beta-2 isoform X2 [Tribolium castaneum]	78.93	0
c11403_g1_i1	c11403_g1_i1|m.8905	8.13	gi|478257371|gb|ENN77529.1|hypothetical protein YQE_05977, partial [Dendroctonus ponderosae]	52.92	6e-82
c11404_g1_i1	c11404_g1_i1|m.8907	1.53	gi|478252911|gb|ENN73295.1|hypothetical protein YQE_10059, partial [Dendroctonus ponderosae]	61.25	9e-62
c11404_g1_i2	c11404_g1_i2|m.8909	1.65	gi|478252911|gb|ENN73295.1|hypothetical protein YQE_10059, partial [Dendroctonus ponderosae]	61.88	4e-63
c11404_g2_i1	c11404_g2_i1|m.8908	3.73	gi|646711682|gb|KDR16773.1|Transcription initiation factor IIA subunit 1 [Zootermopsis nevadensis]	51.09	9e-57
c11405_g1_i1	c11405_g1_i1|m.8910	1.75	gi|91090087|ref|XP_970401.1|PREDICTED: uncharacterized protein LOC658962 isoform X2 [Tribolium castaneum]	69.2	0
c11408_g1_i1	c11408_g1_i1|m.8913	24.5	gi|91092262|ref|XP_967283.1|PREDICTED: methionine aminopeptidase 1 [Tribolium castaneum]	86.74	0
c11409_g1_i1	c11409_g1_i1|m.8914	23.17	gi|91094501|ref|XP_971498.1|PREDICTED: translation initiation factor eIF-2B subunit alpha [Tribolium castaneum]	67.11	3e-148
c11410_g1_i1	c11410_g1_i1|m.8916	1.43	gi|642917332|ref|XP_008199257.1|PREDICTED: rac GTPase-activating protein 1 [Tribolium castaneum]	50.8	0
c11411_g1_i1	c11411_g1_i1|m.8917	6.71	gi|332375488|gb|AEE62885.1|unknown [Dendroctonus ponderosae]	65.23	1e-146
c11411_g1_i2	c11411_g1_i2|m.8918	5.19	gi|332375488|gb|AEE62885.1|unknown [Dendroctonus ponderosae]	65.23	1e-146
c11413_g1_i1	c11413_g1_i1|m.8920	82.78	gi|91081945|ref|XP_966990.1|PREDICTED: ATP-binding cassette sub-family F member 2 [Tribolium castaneum]	87.3	0
c11415_g2_i1	c11415_g2_i1|m.8921	2.99	gi|642914078|ref|XP_969963.3|PREDICTED: uncharacterized protein LOC658486 isoform X4 [Tribolium castaneum]	69.21	0
c11415_g2_i1	c11415_g2_i1|m.8923	2.99	gi|642914076|ref|XP_008201535.1|PREDICTED: uncharacterized protein LOC658486 isoform X3 [Tribolium castaneum]	72	7e-40
c11416_g1_i1	c11416_g1_i1|m.8924	13.91	gi|189239694|ref|XP_974769.2|PREDICTED: dnaJ homolog subfamily C member 1 [Tribolium castaneum]	55.02	8e-119
c11417_g1_i1	c11417_g1_i1|m.8925	44.17	gi|506969311|gb|AGM32999.1|thioredoxin domain-containing protein, partial [Coptotermes formosanus]	72.55	2e-141
c11418_g1_i1	c11418_g1_i1|m.8926	13.18	gi|91080329|ref|XP_974555.1|PREDICTED: mitochondrial ornithine transporter 1 [Tribolium castaneum]	67.55	3e-147
c11419_g1_i1	c11419_g1_i1|m.8927	11.42	gi|283046838|ref|NP_001164362.1|pleiohomeotic [Tribolium castaneum]	85.56	0
c11421_g1_i1	c11421_g1_i1|m.8931	5.39	gi|642938529|ref|XP_967703.2|PREDICTED: RUN domain-containing protein 1-like [Tribolium castaneum]	70.65	0
c11422_g1_i1	c11422_g1_i1|m.8932	18.81	gi|568253343|gb|ETN62507.1|GTP-binding protein alpha subunit, gna [Anopheles darlingi]	88.25	0
c11425_g1_i1	c11425_g1_i1|m.8935	24.83	gi|91085557|ref|XP_966821.1|PREDICTED: peptidyl-prolyl cis-trans isomerase FKBP8 [Tribolium castaneum]	57.4	8e-135
c11426_g1_i1	c11426_g1_i1|m.8936	1.56	gi|91094433|ref|XP_969675.1|PREDICTED: alpha-1,6-mannosyl-glycoprotein 2-beta-N-acetylglucosaminyltransferase isoform X2 [Tribolium castaneum]	83.52	0
c11426_g1_i2	c11426_g1_i2|m.8937	1.29	gi|642939164|ref|XP_008200361.1|PREDICTED: alpha-1,6-mannosyl-glycoprotein 2-beta-N-acetylglucosaminyltransferase isoform X1 [Tribolium castaneum]	84.13	0
c11427_g1_i1	c11427_g1_i1|m.8938	4.91	gi|546685212|gb|ERL94739.1|hypothetical protein D910_12013 [Dendroctonus ponderosae]	53.37	2e-61
c11428_g1_i1	c11428_g1_i1|m.8939	47.19	gi|642919704|ref|XP_008192030.1|PREDICTED: serine/threonine-protein kinase SIK2 [Tribolium castaneum]	78.82	0
c11432_g4_i1	c11432_g4_i1|m.8944	0.63	gi|795012144|ref|XP_011876432.1|PREDICTED: uncharacterized protein LOC105566767 [Vollenhovia emeryi]	50.51	2e-20
c11434_g1_i1	c11434_g1_i1|m.8949	4.83	gi|91094535|ref|XP_972454.1|PREDICTED: protein crooked neck [Tribolium castaneum]	84.08	0
c11435_g1_i1	c11435_g1_i1|m.8950	3.56	gi|91091872|ref|XP_969240.1|PREDICTED: tubulin-specific chaperone D [Tribolium castaneum]	64.26	0
c11436_g1_i1	c11436_g1_i1|m.8951	3.27	gi|642929176|ref|XP_008195725.1|PREDICTED: syntaxin-16 [Tribolium castaneum]	65.92	9e-135
c11437_g1_i1	c11437_g1_i1|m.8952	2.11	gi|642916033|ref|XP_008190864.1|PREDICTED: lisH domain and HEAT repeat-containing protein KIAA1468 homolog [Tribolium castaneum]	54.84	0
c11437_g1_i2	c11437_g1_i2|m.8954	1.8	gi|642916033|ref|XP_008190864.1|PREDICTED: lisH domain and HEAT repeat-containing protein KIAA1468 homolog [Tribolium castaneum]	54.95	0
c11437_g1_i2	c11437_g1_i2|m.8955	1.8	gi|642916033|ref|XP_008190864.1|PREDICTED: lisH domain and HEAT repeat-containing protein KIAA1468 homolog [Tribolium castaneum]	57.46	4e-59
c11437_g1_i3	c11437_g1_i3|m.8957	3.8	gi|642916033|ref|XP_008190864.1|PREDICTED: lisH domain and HEAT repeat-containing protein KIAA1468 homolog [Tribolium castaneum]	61.36	2e-145
c11440_g2_i1	c11440_g2_i1|m.8960	1.89	gi|270012402|gb|EFA08850.1|hypothetical protein TcasGA2_TC006551 [Tribolium castaneum]	74.04	0
c11441_g1_i1	c11441_g1_i1|m.8962	3.12	gi|642924019|ref|XP_008193971.1|PREDICTED: von Willebrand factor A domain-containing protein 9 [Tribolium castaneum]	79.76	0
c11444_g1_i2	c11444_g1_i2|m.8964	4.3	gi|642925661|ref|XP_008194659.1|PREDICTED: ankyrin repeat domain-containing protein 13C [Tribolium castaneum]	87.24	0
c11445_g1_i1	c11445_g1_i1|m.8965	6.47	gi|642931762|ref|XP_008196718.1|PREDICTED: exocyst complex component 7 [Tribolium castaneum]	75.61	0
c11446_g1_i1	c11446_g1_i1|m.8966	5.18	gi|91090674|ref|XP_974487.1|PREDICTED: D-glucuronyl C5-epimerase [Tribolium castaneum]	74.61	0
c11447_g1_i1	c11447_g1_i1|m.8967	4.51	gi|646690780|gb|KDR06952.1|DNA-binding protein RFX7 [Zootermopsis nevadensis]	50.3	3e-83
c11448_g1_i1	c11448_g1_i1|m.8969	3.1	gi|642926894|ref|XP_008195055.1|PREDICTED: ATP-binding cassette sub-family A member 5-like [Tribolium castaneum]	76.57	0
c11448_g2_i1	c11448_g2_i1|m.8970	2.04	gi|642926894|ref|XP_008195055.1|PREDICTED: ATP-binding cassette sub-family A member 5-like [Tribolium castaneum]	65.65	9e-125
c11449_g1_i1	c11449_g1_i1|m.8971	4.92	gi|752890770|ref|XP_011263393.1|PREDICTED: arginine/serine-rich coiled-coil protein 2-like isoform X1 [Camponotus floridanus]	56.31	3e-28
c11449_g1_i2	c11449_g1_i2|m.8973	4.34	gi|752890770|ref|XP_011263393.1|PREDICTED: arginine/serine-rich coiled-coil protein 2-like isoform X1 [Camponotus floridanus]	56.31	3e-28
c11449_g1_i3	c11449_g1_i3|m.8975	4.77	gi|752890770|ref|XP_011263393.1|PREDICTED: arginine/serine-rich coiled-coil protein 2-like isoform X1 [Camponotus floridanus]	56.31	3e-28
c11450_g1_i1	c11450_g1_i1|m.8977	117.56	gi|817011235|gb|AKF11871.1|putative juvenile hormone epoxide hydrolase 2 [Leptinotarsa decemlineata]	57.3	0
c11451_g1_i1	c11451_g1_i1|m.8978	167.8	gi|478255296|gb|ENN75522.1|hypothetical protein YQE_07866, partial [Dendroctonus ponderosae]	60.39	0
c11452_g1_i2	c11452_g1_i2|m.8979	2.93	gi|270002665|gb|EEZ99112.1|hypothetical protein TcasGA2_TC005005 [Tribolium castaneum]	61.19	0
c11452_g1_i3	c11452_g1_i3|m.8980	2.61	gi|270002665|gb|EEZ99112.1|hypothetical protein TcasGA2_TC005005 [Tribolium castaneum]	62.57	0
c11454_g1_i1	c11454_g1_i1|m.8984	94.44	gi|91080775|ref|XP_968281.1|PREDICTED: rab GDP dissociation inhibitor alpha [Tribolium castaneum]	90.74	0
c11455_g1_i1	c11455_g1_i1|m.8985	42.45	gi|91082745|ref|XP_973149.1|PREDICTED: soluble NSF attachment protein [Tribolium castaneum]	86.99	0
c11457_g1_i1	c11457_g1_i1|m.8987	2.89	gi|350419978|ref|XP_003492359.1|PREDICTED: leucine-zipper-like transcriptional regulator 1 [Bombus impatiens]	77.95	0
c11458_g1_i1	c11458_g1_i1|m.8989	10.16	gi|642932707|ref|XP_008196953.1|PREDICTED: ubiquitin carboxyl-terminal hydrolase 45 [Tribolium castaneum]	59.63	0
c11458_g1_i2	c11458_g1_i2|m.8990	10.2	gi|642932707|ref|XP_008196953.1|PREDICTED: ubiquitin carboxyl-terminal hydrolase 45 [Tribolium castaneum]	59.63	0
c11459_g1_i1	c11459_g1_i1|m.8991	4.88	gi|749764925|ref|XP_011141383.1|PREDICTED: zinc carboxypeptidase-like isoform X2 [Harpegnathos saltator]	50.12	1e-132
c11460_g1_i1	c11460_g1_i1|m.8992	0.94	gi|642924902|ref|XP_008194090.1|PREDICTED: serine/threonine-protein phosphatase 2A regulatory subunit B'' subunit beta isoform X2 [Tribolium castaneum]	77.28	0
c11460_g1_i2	c11460_g1_i2|m.8994	0.8	gi|642924902|ref|XP_008194090.1|PREDICTED: serine/threonine-protein phosphatase 2A regulatory subunit B'' subunit beta isoform X2 [Tribolium castaneum]	77.34	0
c11460_g1_i3	c11460_g1_i3|m.8995	1.1	gi|189237914|ref|XP_969710.2|PREDICTED: serine/threonine-protein phosphatase 2A regulatory subunit B'' subunit beta isoform X1 [Tribolium castaneum]	76.58	0
c11462_g1_i1	c11462_g1_i1|m.8997	2.52	gi|91091556|ref|XP_966788.1|PREDICTED: coiled-coil domain-containing protein 130 homolog [Tribolium castaneum]	68.32	6e-158
c11465_g1_i1	c11465_g1_i1|m.9002	1.49	gi|642921874|ref|XP_008192925.1|PREDICTED: LIM domain-containing protein jub isoform X1 [Tribolium castaneum]	65.14	0
c11465_g1_i2	c11465_g1_i2|m.9006	1.13	gi|91081951|ref|XP_967254.1|PREDICTED: LIM domain-containing protein jub isoform X2 [Tribolium castaneum]	66.5	0
c11465_g1_i3	c11465_g1_i3|m.9010	0.61	gi|91081951|ref|XP_967254.1|PREDICTED: LIM domain-containing protein jub isoform X2 [Tribolium castaneum]	96.35	5e-136
c11465_g1_i4	c11465_g1_i4|m.9013	1.28	gi|91081951|ref|XP_967254.1|PREDICTED: LIM domain-containing protein jub isoform X2 [Tribolium castaneum]	66.5	0
c11465_g1_i5	c11465_g1_i5|m.9016	1.26	gi|347972105|ref|XP_001237548.2|AGAP004548-PA [Anopheles gambiae str. PEST]	75	2e-14
c11467_g1_i1	c11467_g1_i1|m.9022	4.1	gi|270010141|gb|EFA06589.1|hypothetical protein TcasGA2_TC009503 [Tribolium castaneum]	60.88	1e-152
c11469_g1_i1	c11469_g1_i1|m.9024	39.58	gi|91084797|ref|XP_972841.1|PREDICTED: zinc transporter ZIP9 [Tribolium castaneum]	73.2	3e-142
c11470_g1_i1	c11470_g1_i1|m.9025	12.43	gi|642935187|ref|XP_008199684.1|PREDICTED: cystinosin homolog [Tribolium castaneum]	62.5	2e-170
c11470_g1_i2	c11470_g1_i2|m.9026	12.23	gi|642935187|ref|XP_008199684.1|PREDICTED: cystinosin homolog [Tribolium castaneum]	62.5	2e-170
c11471_g1_i1	c11471_g1_i1|m.9027	47.47	gi|91085931|ref|XP_970194.1|PREDICTED: proteasome subunit beta type-5 [Tribolium castaneum]	79.93	6e-163
c11472_g1_i1	c11472_g1_i1|m.9028	235.7	gi|91082695|ref|XP_971685.1|PREDICTED: protein disulfide-isomerase A3 [Tribolium castaneum]	72.71	0
c11473_g1_i1	c11473_g1_i1|m.9029	1.27	gi|646701981|gb|KDR11448.1|N-acetylglucosaminyl-phosphatidylinositol biosynthetic protein [Zootermopsis nevadensis]	71.09	0
c11473_g1_i2	c11473_g1_i2|m.9030	1.26	gi|646701981|gb|KDR11448.1|N-acetylglucosaminyl-phosphatidylinositol biosynthetic protein [Zootermopsis nevadensis]	70.56	0
c11474_g1_i1	c11474_g1_i1|m.9031	19.42	gi|91078236|ref|XP_966494.1|PREDICTED: ras-related protein Rab-21 [Tribolium castaneum]	77.88	2e-113
c11475_g1_i1	c11475_g1_i1|m.9032	54.24	gi|546673905|gb|ERL85421.1|hypothetical protein D910_02841 [Dendroctonus ponderosae]	64.12	1e-150
c11475_g1_i2	c11475_g1_i2|m.9038	48.27	gi|546673905|gb|ERL85421.1|hypothetical protein D910_02841 [Dendroctonus ponderosae]	65.77	1e-149
c11475_g2_i1	c11475_g2_i1|m.9033	5.91	gi|642923932|ref|XP_008193933.1|PREDICTED: choline-phosphate cytidylyltransferase A-like isoform X1 [Tribolium castaneum]	75.35	0
c11475_g2_i2	c11475_g2_i2|m.9035	7.07	gi|642923932|ref|XP_008193933.1|PREDICTED: choline-phosphate cytidylyltransferase A-like isoform X1 [Tribolium castaneum]	74.73	0
c11475_g2_i3	c11475_g2_i3|m.9037	7.22	gi|642923932|ref|XP_008193933.1|PREDICTED: choline-phosphate cytidylyltransferase A-like isoform X1 [Tribolium castaneum]	77.01	5e-179
c11476_g1_i1	c11476_g1_i1|m.9040	13.07	gi|642937291|ref|XP_008198773.1|PREDICTED: mannosyl-oligosaccharide alpha-1,2-mannosidase isoform A-like isoform X2 [Tribolium castaneum]	78.24	0
c11476_g1_i2	c11476_g1_i2|m.9041	15.92	gi|91091790|ref|XP_970226.1|PREDICTED: mannosyl-oligosaccharide alpha-1,2-mannosidase isoform A-like isoform X1 [Tribolium castaneum]	77.83	0
c11477_g1_i2	c11477_g1_i2|m.9042	5.95	gi|402535159|gb|AFQ62106.1|female-specific doublesex isoform f1 [Tribolium castaneum]	82.35	1e-149
c11477_g1_i2	c11477_g1_i2|m.9043	5.95	gi|189239148|ref|XP_001807448.1|PREDICTED: protein doublesex [Tribolium castaneum]	61.03	8e-39
c11478_g1_i1	c11478_g1_i1|m.9044	1.1	gi|642937954|ref|XP_008199143.1|PREDICTED: isoleucine--tRNA ligase, mitochondrial [Tribolium castaneum]	54.56	0
c11478_g2_i1	c11478_g2_i1|m.9045	2.52	gi|270015688|gb|EFA12136.1|hypothetical protein TcasGA2_TC002282 [Tribolium castaneum]	52.44	4e-122
c11479_g1_i1	c11479_g1_i1|m.9046	50.26	gi|282720991|ref|NP_001164246.1|epsin-like protein [Tribolium castaneum]	69.55	1e-141
c11479_g1_i1	c11479_g1_i1|m.9047	50.26	gi|478259225|gb|ENN79127.1|hypothetical protein YQE_04314, partial [Dendroctonus ponderosae]	53.57	6e-12
c11481_g1_i1	c11481_g1_i1|m.9049	6.72	gi|270006170|gb|EFA02618.1|hypothetical protein TcasGA2_TC008338 [Tribolium castaneum]	75.32	2e-160
c11481_g1_i2	c11481_g1_i2|m.9050	13.93	gi|270006170|gb|EFA02618.1|hypothetical protein TcasGA2_TC008338 [Tribolium castaneum]	80.07	0
c11484_g1_i1	c11484_g1_i1|m.9054	2.89	gi|642926901|ref|XP_008195058.1|PREDICTED: cell division control protein 45 homolog [Tribolium castaneum]	65.48	0
c11486_g1_i1	c11486_g1_i1|m.9056	22.7	gi|194748467|ref|XP_001956667.1|GF10053 [Drosophila ananassae]	63.72	6e-35
c11486_g1_i2	c11486_g1_i2|m.9057	14.32	gi|909550439|ref|XP_013135088.1|PREDICTED: endochitinase A-like [Papilio polytes]	59.03	2e-38
c11487_g1_i1	c11487_g1_i1|m.9058	1.72	gi|642916693|ref|XP_008192186.1|PREDICTED: membrane-bound transcription factor site-1 protease isoform X2 [Tribolium castaneum]	66.67	3e-13
c11487_g1_i2	c11487_g1_i2|m.9059	4.28	gi|642916693|ref|XP_008192186.1|PREDICTED: membrane-bound transcription factor site-1 protease isoform X2 [Tribolium castaneum]	79.85	0
c11488_g1_i1	c11488_g1_i1|m.9060	4.63	gi|91086799|ref|XP_973439.1|PREDICTED: protein O-mannosyl-transferase 2 [Tribolium castaneum]	77.59	0
c11488_g1_i1	c11488_g1_i1|m.9061	4.63	gi|91086799|ref|XP_973439.1|PREDICTED: protein O-mannosyl-transferase 2 [Tribolium castaneum]	81.48	4e-123
c11488_g1_i2	c11488_g1_i2|m.9063	5.11	gi|91086799|ref|XP_973439.1|PREDICTED: protein O-mannosyl-transferase 2 [Tribolium castaneum]	79.33	0
c11489_g1_i1	c11489_g1_i1|m.9064	61.83	gi|91082905|ref|XP_972330.1|PREDICTED: eukaryotic translation initiation factor 2A [Tribolium castaneum]	58.4	0
c1149_g1_i1	c1149_g1_i1|m.340	1.42	gi|642922682|ref|XP_008193278.1|PREDICTED: basement membrane-specific heparan sulfate proteoglycan core protein isoform X10 [Tribolium castaneum]	53.78	4e-29
c1149_g1_i2	c1149_g1_i2|m.341	1.36	gi|642922692|ref|XP_008193283.1|PREDICTED: basement membrane-specific heparan sulfate proteoglycan core protein isoform X15 [Tribolium castaneum]	54.67	1e-39
c11490_g1_i1	c11490_g1_i1|m.9065	8.84	gi|91083973|ref|XP_975149.1|PREDICTED: splicing factor 45 [Tribolium castaneum]	70.66	5e-180
c11491_g1_i1	c11491_g1_i1|m.9067	28.08	gi|114051530|ref|NP_001040356.1|cytidylate kinase [Bombyx mori]	66.01	3e-97
c11493_g1_i1	c11493_g1_i1|m.9069	30.69	gi|270012454|gb|EFA08902.1|hypothetical protein TcasGA2_TC006605 [Tribolium castaneum]	65.52	1e-105
c11497_g1_i1	c11497_g1_i1|m.9073	0.88	gi|642915226|ref|XP_971326.2|PREDICTED: TGF-beta receptor type-1 isoform X3 [Tribolium castaneum]	66.67	3e-46
c11497_g1_i2	c11497_g1_i2|m.9074	3.07	gi|642915226|ref|XP_971326.2|PREDICTED: TGF-beta receptor type-1 isoform X3 [Tribolium castaneum]	80.91	0
c11497_g1_i3	c11497_g1_i3|m.9075	2.72	gi|642915222|ref|XP_008190529.1|PREDICTED: TGF-beta receptor type-1 isoform X1 [Tribolium castaneum]	74.86	0
c11498_g1_i1	c11498_g1_i1|m.9076	1.39	gi|91083531|ref|XP_973193.1|PREDICTED: carbonyl reductase [NADPH] 1 [Tribolium castaneum]	55.56	9e-111
c11498_g2_i1	c11498_g2_i1|m.9077	3.43	gi|642924002|ref|XP_008193964.1|PREDICTED: carbonyl reductase [NADPH] 1-like, partial [Tribolium castaneum]	57.14	6e-36
c11498_g2_i2	c11498_g2_i2|m.9078	3.88	gi|91083531|ref|XP_973193.1|PREDICTED: carbonyl reductase [NADPH] 1 [Tribolium castaneum]	58.42	1e-115
c11499_g1_i1	c11499_g1_i1|m.9079	76.89	gi|441494178|gb|AGC50803.1|copper/zinc superoxide dismutase [Carassius auratus ssp. 'Pengze']	63.77	1e-55
c11499_g1_i2	c11499_g1_i2|m.9080	95.96	gi|441494178|gb|AGC50803.1|copper/zinc superoxide dismutase [Carassius auratus ssp. 'Pengze']	63.77	1e-55
c115_g1_i1	c115_g1_i1|m.39	12.66	gi|546677363|gb|ERL88220.1|hypothetical protein D910_05608 [Dendroctonus ponderosae]	62.69	5e-84
c11502_g1_i1	c11502_g1_i1|m.9083	3.84	gi|189237952|ref|XP_001813626.1|PREDICTED: methyltransferase-like protein 13 [Tribolium castaneum]	58.26	0
c11503_g1_i1	c11503_g1_i1|m.9084	2.08	gi|642925387|ref|XP_008194528.1|PREDICTED: probable cation-transporting ATPase 13A3 [Tribolium castaneum]	53.92	0
c11505_g1_i1	c11505_g1_i1|m.9087	1.61	gi|270002846|gb|EEZ99293.1|sevenless [Tribolium castaneum]	59.3	0
c11505_g2_i1	c11505_g2_i1|m.9088	1.31	gi|270002846|gb|EEZ99293.1|sevenless [Tribolium castaneum]	55.66	0
c11505_g2_i2	c11505_g2_i2|m.9090	1.09	gi|270002846|gb|EEZ99293.1|sevenless [Tribolium castaneum]	56.3	0
c11506_g1_i1	c11506_g1_i1|m.9092	110.59	gi|642928115|ref|XP_008200163.1|PREDICTED: protein anoxia up-regulated isoform X1 [Tribolium castaneum]	53.2	2e-151
c11506_g1_i2	c11506_g1_i2|m.9093	25.9	gi|270010857|gb|EFA07305.1|hypothetical protein TcasGA2_TC015895 [Tribolium castaneum]	54.73	2e-42
c11506_g1_i3	c11506_g1_i3|m.9094	89.53	gi|642928123|ref|XP_008200167.1|PREDICTED: trichohyalin isoform X5 [Tribolium castaneum]	60.17	2e-86
c11506_g1_i4	c11506_g1_i4|m.9095	86.16	gi|642928123|ref|XP_008200167.1|PREDICTED: trichohyalin isoform X5 [Tribolium castaneum]	50	6e-77
c11506_g1_i5	c11506_g1_i5|m.9096	185.97	gi|662206411|ref|XP_008476666.1|PREDICTED: uncharacterized protein LOC103513598 [Diaphorina citri]	64.04	2e-26
c11508_g1_i1	c11508_g1_i1|m.9097	2.68	gi|642931230|ref|XP_971294.2|PREDICTED: thymidine kinase 2, mitochondrial-like [Tribolium castaneum]	65.57	6e-95
c11508_g1_i2	c11508_g1_i2|m.9099	2.56	gi|270011851|gb|EFA08299.1|hypothetical protein TcasGA2_TC005934 [Tribolium castaneum]	61.74	6e-59
c11508_g1_i3	c11508_g1_i3|m.9100	2.86	gi|642931230|ref|XP_971294.2|PREDICTED: thymidine kinase 2, mitochondrial-like [Tribolium castaneum]	65.57	6e-95
c11508_g2_i1	c11508_g2_i1|m.9098	5.09	gi|91088147|ref|XP_971356.1|PREDICTED: platelet-activating factor acetylhydrolase [Tribolium castaneum]	52.48	1e-140
c11509_g1_i1	c11509_g1_i1|m.9101	24.4	gi|817209447|ref|XP_012280776.1|PREDICTED: saccharopine dehydrogenase-like oxidoreductase [Orussus abietinus]	52.73	3e-168
c11510_g1_i1	c11510_g1_i1|m.9102	18.66	gi|91086451|ref|XP_969201.1|PREDICTED: methionine--tRNA ligase, cytoplasmic [Tribolium castaneum]	58.16	0
c11511_g1_i1	c11511_g1_i1|m.9103	2.73	gi|189238819|ref|XP_967914.2|PREDICTED: N6-adenosine-methyltransferase 70 kDa subunit [Tribolium castaneum]	76.88	0
c11511_g1_i1	c11511_g1_i1|m.9104	2.73	gi|91085889|ref|XP_967833.1|PREDICTED: UPF0183 protein CG7083 isoform X1 [Tribolium castaneum]	77.56	0
c11513_g1_i1	c11513_g1_i1|m.9106	3.59	gi|91094281|ref|XP_970827.1|PREDICTED: protein MEMO1 [Tribolium castaneum]	85.99	2e-94
c11513_g1_i1	c11513_g1_i1|m.9107	3.59	gi|91094281|ref|XP_970827.1|PREDICTED: protein MEMO1 [Tribolium castaneum]	88.03	2e-89
c11513_g1_i2	c11513_g1_i2|m.9108	2.84	gi|91094281|ref|XP_970827.1|PREDICTED: protein MEMO1 [Tribolium castaneum]	85.99	2e-94
c11513_g1_i3	c11513_g1_i3|m.9109	4.83	gi|91094281|ref|XP_970827.1|PREDICTED: protein MEMO1 [Tribolium castaneum]	88.14	0
c11513_g1_i4	c11513_g1_i4|m.9110	3.77	gi|91094281|ref|XP_970827.1|PREDICTED: protein MEMO1 [Tribolium castaneum]	88.03	3e-89
c11514_g1_i1	c11514_g1_i1|m.9111	17.88	gi|91079624|ref|XP_967576.1|PREDICTED: peptidyl-prolyl cis-trans isomerase NIMA-interacting 1 [Tribolium castaneum]	87.26	3e-98
c11516_g1_i1	c11516_g1_i1|m.9114	4.3	gi|91094797|ref|XP_966355.1|PREDICTED: elongation factor 1-alpha [Tribolium castaneum]	94.24	0
c11516_g1_i2	c11516_g1_i2|m.9115	4.73	gi|91094797|ref|XP_966355.1|PREDICTED: elongation factor 1-alpha [Tribolium castaneum]	94.24	0
c11517_g1_i1	c11517_g1_i1|m.9116	3.99	gi|642916067|ref|XP_970503.2|PREDICTED: major facilitator superfamily domain-containing protein 6 [Tribolium castaneum]	51.2	0
c11517_g1_i3	c11517_g1_i3|m.9117	5.31	gi|642916067|ref|XP_970503.2|PREDICTED: major facilitator superfamily domain-containing protein 6 [Tribolium castaneum]	52.07	0
c11519_g1_i1	c11519_g1_i1|m.9118	3.16	gi|642932902|ref|XP_008197179.1|PREDICTED: carboxypeptidase M isoform X2 [Tribolium castaneum]	80.23	0
c11519_g1_i2	c11519_g1_i2|m.9119	1.12	gi|646713892|gb|KDR18068.1|Carboxypeptidase M [Zootermopsis nevadensis]	69.6	1e-50
c11520_g1_i1	c11520_g1_i1|m.9120	3.44	gi|270012579|gb|EFA09027.1|hypothetical protein TcasGA2_TC006738 [Tribolium castaneum]	95.24	8e-68
c11520_g1_i2	c11520_g1_i2|m.9121	2.86	gi|270012579|gb|EFA09027.1|hypothetical protein TcasGA2_TC006738 [Tribolium castaneum]	95.24	8e-68
c11520_g1_i3	c11520_g1_i3|m.9122	4.59	gi|270012579|gb|EFA09027.1|hypothetical protein TcasGA2_TC006738 [Tribolium castaneum]	94.09	3e-141
c11521_g1_i1	c11521_g1_i1|m.9123	3.2	gi|91081833|ref|XP_974716.1|PREDICTED: replication factor C subunit 4 [Tribolium castaneum]	69.14	8e-178
c11523_g1_i1	c11523_g1_i1|m.9125	10.52	gi|642930808|ref|XP_008196098.1|PREDICTED: TAR DNA-binding protein 43-like isoform X2 [Tribolium castaneum]	88.48	0
c11523_g1_i2	c11523_g1_i2|m.9126	12.37	gi|270011960|gb|EFA08408.1|hypothetical protein TcasGA2_TC006055 [Tribolium castaneum]	58.21	2e-31
c11523_g1_i3	c11523_g1_i3|m.9127	12.66	gi|642930808|ref|XP_008196098.1|PREDICTED: TAR DNA-binding protein 43-like isoform X2 [Tribolium castaneum]	87.95	0
c11523_g1_i4	c11523_g1_i4|m.9128	13.93	gi|270011960|gb|EFA08408.1|hypothetical protein TcasGA2_TC006055 [Tribolium castaneum]	79.12	0
c11524_g1_i1	c11524_g1_i1|m.9130	137.38	gi|91085965|ref|XP_971530.1|PREDICTED: protein ERGIC-53 [Tribolium castaneum]	69.75	0
c11527_g1_i1	c11527_g1_i1|m.9133	1.94	gi|642913250|ref|XP_008201456.1|PREDICTED: probable dolichyl pyrophosphate Glc1Man9GlcNAc2 alpha-1,3-glucosyltransferase [Tribolium castaneum]	62.5	3e-106
c11527_g1_i2	c11527_g1_i2|m.9134	2.15	gi|642913250|ref|XP_008201456.1|PREDICTED: probable dolichyl pyrophosphate Glc1Man9GlcNAc2 alpha-1,3-glucosyltransferase [Tribolium castaneum]	65.68	0
c11528_g1_i1	c11528_g1_i1|m.9135	1.84	gi|642914785|ref|XP_008190351.1|PREDICTED: LIM domain-binding protein 2 isoform X6 [Tribolium castaneum]	91.84	0
c11528_g1_i2	c11528_g1_i2|m.9136	1.52	gi|270001422|gb|EEZ97869.1|hypothetical protein TcasGA2_TC000244 [Tribolium castaneum]	91.1	0
c11529_g1_i1	c11529_g1_i1|m.9137	1.87	gi|642932082|ref|XP_008196850.1|PREDICTED: zinc finger with UFM1-specific peptidase domain protein-like isoform X2 [Tribolium castaneum]	76.18	0
c11529_g1_i2	c11529_g1_i2|m.9138	1.72	gi|642932082|ref|XP_008196850.1|PREDICTED: zinc finger with UFM1-specific peptidase domain protein-like isoform X2 [Tribolium castaneum]	84.46	0
c11529_g1_i2	c11529_g1_i2|m.9139	1.72	gi|642932082|ref|XP_008196850.1|PREDICTED: zinc finger with UFM1-specific peptidase domain protein-like isoform X2 [Tribolium castaneum]	61.6	8e-100
c11531_g2_i1	c11531_g2_i1|m.9144	39.63	gi|642920248|ref|XP_008192267.1|PREDICTED: probable cytochrome P450 6a14 [Tribolium castaneum]	52.85	2e-40
c11532_g1_i1	c11532_g1_i1|m.9146	72.92	gi|642913622|ref|XP_008201092.1|PREDICTED: moesin/ezrin/radixin homolog 1 isoform X3 [Tribolium castaneum]	89.79	0
c11532_g1_i2	c11532_g1_i2|m.9147	68.76	gi|642913620|ref|XP_008201091.1|PREDICTED: moesin/ezrin/radixin homolog 1 isoform X2 [Tribolium castaneum]	90	0
c11533_g1_i1	c11533_g1_i1|m.9148	6.63	gi|91076704|ref|XP_972106.1|PREDICTED: UDP-galactose translocator [Tribolium castaneum]	73.15	4e-160
c11534_g1_i1	c11534_g1_i1|m.9149	16.52	gi|642910800|ref|XP_008193416.1|PREDICTED: ferrochelatase, mitochondrial [Tribolium castaneum]	70.17	0
c11535_g1_i1	c11535_g1_i1|m.9150	1.29	gi|642911114|ref|XP_008200584.1|PREDICTED: tyrosine-protein phosphatase 99A [Tribolium castaneum]	73.21	0
c11535_g1_i2	c11535_g1_i2|m.9151	0.89	gi|270014603|gb|EFA11051.1|hypothetical protein TcasGA2_TC004645 [Tribolium castaneum]	80	0
c11535_g1_i3	c11535_g1_i3|m.9152	1.12	gi|270014603|gb|EFA11051.1|hypothetical protein TcasGA2_TC004645 [Tribolium castaneum]	73.09	0
c11536_g1_i1	c11536_g1_i1|m.9153	2.18	gi|91092856|ref|XP_969290.1|PREDICTED: protein furry [Tribolium castaneum]	70.87	0
c11536_g2_i1	c11536_g2_i1|m.9155	2.22	gi|817078822|ref|XP_012261797.1|PREDICTED: protein furry isoform X2 [Athalia rosae]	66.07	6e-89
c11538_g1_i1	c11538_g1_i1|m.9158	2.66	gi|478259927|gb|ENN79729.1|hypothetical protein YQE_03785, partial [Dendroctonus ponderosae]	50.65	3e-46
c11539_g1_i1	c11539_g1_i1|m.9160	26.1	gi|91079774|ref|XP_967412.1|PREDICTED: glutathione S-transferase omega-1 [Tribolium castaneum]	61.98	8e-107
c11541_g1_i1	c11541_g1_i1|m.9162	1.05	gi|768423972|ref|XP_011552918.1|PREDICTED: RNA-directed DNA polymerase from mobile element jockey-like [Plutella xylostella]	51.79	2e-55
c11541_g1_i1	c11541_g1_i1|m.9163	1.05	gi|751241429|ref|XP_011174808.1|PREDICTED: craniofacial development protein 2-like, partial [Solenopsis invicta]	61.67	2e-17
c11542_g1_i1	c11542_g1_i1|m.9164	11.99	gi|642929895|ref|XP_008196017.1|PREDICTED: nucleolar protein 9 [Tribolium castaneum]	54.59	0
c11543_g1_i1	c11543_g1_i1|m.9165	12.28	gi|91087237|ref|XP_975509.1|PREDICTED: delta-aminolevulinic acid dehydratase [Tribolium castaneum]	71.08	2e-167
c11543_g1_i2	c11543_g1_i2|m.9167	7.04	gi|91087237|ref|XP_975509.1|PREDICTED: delta-aminolevulinic acid dehydratase [Tribolium castaneum]	71.08	2e-167
c11544_g1_i1	c11544_g1_i1|m.9168	55.14	gi|91095123|ref|XP_970890.1|PREDICTED: dehydrogenase/reductase SDR family member 11 [Tribolium castaneum]	55.25	2e-87
c11544_g2_i1	c11544_g2_i1|m.9169	51.58	gi|91095123|ref|XP_970890.1|PREDICTED: dehydrogenase/reductase SDR family member 11 [Tribolium castaneum]	57.2	3e-89
c11545_g1_i1	c11545_g1_i1|m.9170	10.45	gi|91086165|ref|XP_970259.1|PREDICTED: ATP-dependent zinc metalloprotease YME1 homolog [Tribolium castaneum]	76.01	0
c11545_g1_i2	c11545_g1_i2|m.9171	10.08	gi|91086165|ref|XP_970259.1|PREDICTED: ATP-dependent zinc metalloprotease YME1 homolog [Tribolium castaneum]	76.01	0
c11546_g1_i1	c11546_g1_i1|m.9172	2.25	gi|751442269|ref|XP_011195769.1|PREDICTED: uncharacterized protein LOC105220906 [Bactrocera cucurbitae]	50.65	1e-14
c11546_g1_i2	c11546_g1_i2|m.9173	2.05	gi|662205318|ref|XP_008476067.1|PREDICTED: uncharacterized protein LOC103513035 [Diaphorina citri]	63.08	5e-18
c11548_g1_i1	c11548_g1_i1|m.9175	71.44	gi|91087085|ref|XP_974959.1|PREDICTED: phytepsin [Tribolium castaneum]	50.43	3e-116
c11549_g1_i1	c11549_g1_i1|m.9176	3.9	gi|546677543|gb|ERL88362.1|hypothetical protein D910_05749 [Dendroctonus ponderosae]	54.64	0
c11549_g1_i2	c11549_g1_i2|m.9177	3.6	gi|546677543|gb|ERL88362.1|hypothetical protein D910_05749 [Dendroctonus ponderosae]	54.64	0
c11551_g1_i1	c11551_g1_i1|m.9180	20.13	gi|478252243|gb|ENN72671.1|hypothetical protein YQE_10769, partial [Dendroctonus ponderosae]	73.23	4e-173
c11551_g1_i2	c11551_g1_i2|m.9182	16.5	gi|478252243|gb|ENN72671.1|hypothetical protein YQE_10769, partial [Dendroctonus ponderosae]	74.42	8e-119
c11553_g1_i1	c11553_g1_i1|m.9185	4.59	gi|189237885|ref|XP_975345.2|PREDICTED: conserved oligomeric Golgi complex subunit 4 [Tribolium castaneum]	69.19	0
c11555_g1_i1	c11555_g1_i1|m.9188	1.58	gi|270012501|gb|EFA08949.1|hypothetical protein TcasGA2_TC006656 [Tribolium castaneum]	91.11	3e-110
c11555_g1_i2	c11555_g1_i2|m.9189	1.2	gi|270012501|gb|EFA08949.1|hypothetical protein TcasGA2_TC006656 [Tribolium castaneum]	85.33	1e-34
c11555_g1_i2	c11555_g1_i2|m.9190	1.2	gi|642933041|ref|XP_008197240.1|PREDICTED: neo-calmodulin-like isoform X2 [Tribolium castaneum]	94.95	9e-59
c11557_g1_i1	c11557_g1_i1|m.9192	5.12	gi|642914217|ref|XP_008201594.1|PREDICTED: abl interactor 2-like [Tribolium castaneum]	80.08	0
c11557_g1_i2	c11557_g1_i2|m.9193	4.57	gi|642914217|ref|XP_008201594.1|PREDICTED: abl interactor 2-like [Tribolium castaneum]	79.75	0
c11559_g1_i1	c11559_g1_i1|m.9194	1.3	gi|634006736|gb|AHZ59647.1|glycoside hydrolase family 1 [Phyllotreta striolata]	50.41	1e-112
c11559_g2_i1	c11559_g2_i1|m.9195	6.76	gi|646712923|gb|KDR17469.1|hypothetical protein L798_07853, partial [Zootermopsis nevadensis]	50.32	7e-166
c1156_g1_i1	c1156_g1_i1|m.344	0.71	gi|478252158|gb|ENN72586.1|hypothetical protein YQE_10687, partial [Dendroctonus ponderosae]	84.11	2e-56
c1156_g2_i1	c1156_g2_i1|m.345	0.69	gi|478252158|gb|ENN72586.1|hypothetical protein YQE_10687, partial [Dendroctonus ponderosae]	63.31	2e-69
c11560_g1_i1	c11560_g1_i1|m.9197	0.66	gi|567945985|gb|ETK71796.1|hypothetical protein L915_21016 [Phytophthora parasitica]	50	9e-32
c11560_g1_i2	c11560_g1_i2|m.9200	1.27	gi|567945985|gb|ETK71796.1|hypothetical protein L915_21016 [Phytophthora parasitica]	50	9e-32
c11562_g1_i1	c11562_g1_i1|m.9202	7.47	gi|645030338|ref|XP_008214123.1|PREDICTED: LOW QUALITY PROTEIN: regulator of nonsense transcripts 3A [Nasonia vitripennis]	56.61	7e-65
c11563_g1_i1	c11563_g1_i1|m.9203	4.37	gi|189242404|ref|XP_968940.2|PREDICTED: palmitoyltransferase ZDHHC5 isoform X2 [Tribolium castaneum]	85.81	4e-172
c11563_g1_i2	c11563_g1_i2|m.9204	7.84	gi|189242404|ref|XP_968940.2|PREDICTED: palmitoyltransferase ZDHHC5 isoform X2 [Tribolium castaneum]	87.32	0
c11564_g1_i1	c11564_g1_i1|m.9205	2.43	gi|768445187|ref|XP_011564480.1|PREDICTED: protein diaphanous homolog 1-like, partial [Plutella xylostella]	50.3	6e-40
c11564_g1_i2	c11564_g1_i2|m.9206	0.98	gi|91082885|ref|XP_971739.1|PREDICTED: leucine-rich repeat extensin-like protein 3 [Tribolium castaneum]	66.32	8e-80
c11566_g2_i1	c11566_g2_i1|m.9209	1.08	gi|270006002|gb|EFA02450.1|hypothetical protein TcasGA2_TC008137 [Tribolium castaneum]	51.43	2e-130
c11566_g3_i1	c11566_g3_i1|m.9210	2.24	gi|270006004|gb|EFA02452.1|hypothetical protein TcasGA2_TC008139 [Tribolium castaneum]	58.39	1e-128
c11566_g3_i1	c11566_g3_i1|m.9211	2.24	gi|270006004|gb|EFA02452.1|hypothetical protein TcasGA2_TC008139 [Tribolium castaneum]	80.24	4e-92
c11566_g3_i2	c11566_g3_i2|m.9212	2.05	gi|642920080|ref|XP_001816051.2|PREDICTED: uncharacterized protein LOC100142030 [Tribolium castaneum]	60.29	0
c11568_g1_i1	c11568_g1_i1|m.9214	89.93	gi|91086195|ref|XP_971475.1|PREDICTED: protein transport protein Sec23A isoform X2 [Tribolium castaneum]	90.87	0
c11569_g1_i1	c11569_g1_i1|m.9215	8.9	gi|91080077|ref|XP_967815.1|PREDICTED: gamma-soluble NSF attachment protein [Tribolium castaneum]	75.07	0
c11571_g1_i1	c11571_g1_i1|m.9217	18.18	gi|478262971|gb|ENN81377.1|hypothetical protein YQE_02194, partial [Dendroctonus ponderosae]	50.09	0
c11573_g2_i1	c11573_g2_i1|m.9219	13.15	gi|913329387|ref|XP_013196184.1|PREDICTED: retinol dehydrogenase 13-like [Amyelois transitella]	61.66	3e-135
c11574_g1_i1	c11574_g1_i1|m.9220	1.6	gi|755944119|ref|XP_011299351.1|PREDICTED: NADPH:adrenodoxin oxidoreductase, mitochondrial [Fopius arisanus]	58.13	0
c11575_g1_i1	c11575_g1_i1|m.9222	34.37	gi|642914979|ref|XP_008190468.1|PREDICTED: regulator of nonsense transcripts 1 homolog [Tribolium castaneum]	92.66	0
c11576_g1_i1	c11576_g1_i1|m.9223	3.97	gi|642933484|ref|XP_973892.2|PREDICTED: soluble calcium-activated nucleotidase 1 [Tribolium castaneum]	70.59	1e-93
c11576_g1_i2	c11576_g1_i2|m.9224	3.6	gi|642933484|ref|XP_973892.2|PREDICTED: soluble calcium-activated nucleotidase 1 [Tribolium castaneum]	70.59	2e-93
c11576_g1_i3	c11576_g1_i3|m.9225	10.58	gi|642933484|ref|XP_973892.2|PREDICTED: soluble calcium-activated nucleotidase 1 [Tribolium castaneum]	70.08	0
c11577_g1_i1	c11577_g1_i1|m.9226	4.53	gi|642931768|ref|XP_008196720.1|PREDICTED: cytohesin-1 isoform X3 [Tribolium castaneum]	88.57	0
c11577_g1_i2	c11577_g1_i2|m.9228	4.35	gi|642931770|ref|XP_008196721.1|PREDICTED: cytohesin-1 isoform X4 [Tribolium castaneum]	92.25	0
c11578_g1_i1	c11578_g1_i1|m.9230	8.14	gi|642929081|ref|XP_008195683.1|PREDICTED: venom metalloproteinase 3 isoform X3 [Tribolium castaneum]	68.65	0
c11578_g1_i2	c11578_g1_i2|m.9231	8.23	gi|642929081|ref|XP_008195683.1|PREDICTED: venom metalloproteinase 3 isoform X3 [Tribolium castaneum]	74.92	0
c11578_g1_i3	c11578_g1_i3|m.9232	8.92	gi|642929081|ref|XP_008195683.1|PREDICTED: venom metalloproteinase 3 isoform X3 [Tribolium castaneum]	74.65	0
c11578_g1_i4	c11578_g1_i4|m.9233	7.02	gi|642929081|ref|XP_008195683.1|PREDICTED: venom metalloproteinase 3 isoform X3 [Tribolium castaneum]	68.65	0
c11581_g1_i1	c11581_g1_i1|m.9235	135.84	gi|332376793|gb|AEE63536.1|unknown [Dendroctonus ponderosae]	70.05	1e-109
c11581_g1_i2	c11581_g1_i2|m.9236	44.29	gi|158293614|ref|XP_314956.4|AGAP008822-PA [Anopheles gambiae str. PEST]	79.66	3e-100
c11582_g1_i1	c11582_g1_i1|m.9238	3.59	gi|642922975|ref|XP_008200476.1|PREDICTED: growth hormone-regulated TBC protein 1 [Tribolium castaneum]	65.33	2e-158
c11583_g1_i1	c11583_g1_i1|m.9239	2.6	gi|642936309|ref|XP_008198390.1|PREDICTED: protein FAM107B isoform X3 [Tribolium castaneum]	68.66	2e-51
c11583_g1_i2	c11583_g1_i2|m.9240	4.14	gi|642936307|ref|XP_008198389.1|PREDICTED: protein FAM107B isoform X2 [Tribolium castaneum]	59.36	5e-59
c11583_g1_i3	c11583_g1_i3|m.9241	2.55	gi|642936309|ref|XP_008198390.1|PREDICTED: protein FAM107B isoform X3 [Tribolium castaneum]	68.66	2e-51
c11584_g1_i1	c11584_g1_i1|m.9242	2.43	gi|270007206|gb|EFA03654.1|hypothetical protein TcasGA2_TC013748 [Tribolium castaneum]	63.4	0
c11584_g1_i2	c11584_g1_i2|m.9244	2.58	gi|270007206|gb|EFA03654.1|hypothetical protein TcasGA2_TC013748 [Tribolium castaneum]	65.07	0
c11586_g1_i1	c11586_g1_i1|m.9258	2.6	gi|646718599|gb|KDR21011.1|Phosphatidylinositol-4,5-bisphosphate 3-kinase catalytic subunit delta isoform [Zootermopsis nevadensis]	64.26	0
c11587_g2_i1	c11587_g2_i1|m.9259	9.56	gi|91092776|ref|XP_973805.1|PREDICTED: uncharacterized protein C4orf29 isoform X2 [Tribolium castaneum]	57.53	0
c11587_g2_i2	c11587_g2_i2|m.9260	5.5	gi|568248962|gb|ETN58789.1|hypothetical protein AND_009626 [Anopheles darlingi]	63.74	7e-36
c11591_g1_i1	c11591_g1_i1|m.9264	3.83	gi|646716491|gb|KDR19729.1|F-box/WD repeat-containing protein 1A [Zootermopsis nevadensis]	88.69	0
c11591_g1_i2	c11591_g1_i2|m.9265	4.09	gi|646716491|gb|KDR19729.1|F-box/WD repeat-containing protein 1A [Zootermopsis nevadensis]	88.76	0
c11592_g1_i1	c11592_g1_i1|m.9266	17.73	gi|91093575|ref|XP_968639.1|PREDICTED: AP-1 complex subunit mu-1 [Tribolium castaneum]	97.63	0
c11593_g1_i1	c11593_g1_i1|m.9268	3.56	gi|642920689|ref|XP_008192522.1|PREDICTED: DNA-binding protein D-ETS-4 isoform X2 [Tribolium castaneum]	80.89	6e-84
c11593_g1_i2	c11593_g1_i2|m.9269	3.73	gi|642920687|ref|XP_968441.2|PREDICTED: DNA-binding protein D-ETS-4 isoform X1 [Tribolium castaneum]	59.04	0
c11593_g1_i3	c11593_g1_i3|m.9270	1.93	gi|642920691|ref|XP_008192524.1|PREDICTED: DNA-binding protein D-ETS-4 isoform X3 [Tribolium castaneum]	87.96	3e-61
c11594_g1_i1	c11594_g1_i1|m.9271	6.47	gi|642916875|ref|XP_969942.2|PREDICTED: guanosine-3',5'-bis(diphosphate) 3'-pyrophosphohydrolase MESH1 [Tribolium castaneum]	70.59	2e-83
c11597_g2_i1	c11597_g2_i1|m.9274	20.2	gi|766925761|ref|XP_011494788.1|PREDICTED: transmembrane protein 230 isoform X3 [Ceratosolen solmsi marchali]	51.28	2e-33
c11597_g2_i3	c11597_g2_i3|m.9275	7.21	gi|766925761|ref|XP_011494788.1|PREDICTED: transmembrane protein 230 isoform X3 [Ceratosolen solmsi marchali]	50.43	2e-30
c11599_g1_i1	c11599_g1_i1|m.9277	10.02	gi|91088313|ref|XP_966779.1|PREDICTED: 6-phosphofructokinase isoform X1 [Tribolium castaneum]	85.54	0
c11599_g1_i1	c11599_g1_i1|m.9278	10.02	gi|157114499|ref|XP_001652300.1|AAEL006895-PA [Aedes aegypti]	79.68	0
c11599_g1_i2	c11599_g1_i2|m.9280	13.81	gi|157114499|ref|XP_001652300.1|AAEL006895-PA [Aedes aegypti]	79.28	0
c11599_g1_i3	c11599_g1_i3|m.9282	4.39	gi|91088313|ref|XP_966779.1|PREDICTED: 6-phosphofructokinase isoform X1 [Tribolium castaneum]	85.54	0
c116_g1_i1	c116_g1_i1|m.40	1.28	gi|270009021|gb|EFA05469.1|hypothetical protein TcasGA2_TC015652 [Tribolium castaneum]	63.21	2e-77
c11600_g1_i1	c11600_g1_i1|m.9284	32.41	gi|642912175|ref|XP_008200838.1|PREDICTED: heterogeneous nuclear ribonucleoprotein A1, A2/B1 homolog isoform X2 [Tribolium castaneum]	71.04	9e-130
c11601_g1_i1	c11601_g1_i1|m.9286	71.04	gi|642927308|ref|XP_008195215.1|PREDICTED: peroxisomal multifunctional enzyme type 2 isoform X2 [Tribolium castaneum]	64.8	1e-48
c11601_g1_i2	c11601_g1_i2|m.9287	37.8	gi|91085817|ref|XP_974784.1|PREDICTED: peroxisomal multifunctional enzyme type 2 isoform X1 [Tribolium castaneum]	66.25	0
c11603_g1_i1	c11603_g1_i1|m.9290	5.96	gi|646716228|gb|KDR19557.1|Serine/threonine-protein kinase ULK3 [Zootermopsis nevadensis]	58.33	3e-85
c11603_g1_i2	c11603_g1_i2|m.9292	3.73	gi|646716228|gb|KDR19557.1|Serine/threonine-protein kinase ULK3 [Zootermopsis nevadensis]	58.33	4e-85
c11605_g1_i1	c11605_g1_i1|m.9294	6.59	gi|270011813|gb|EFA08261.1|hypothetical protein TcasGA2_TC005889 [Tribolium castaneum]	74.34	3e-146
c11605_g1_i1	c11605_g1_i1|m.9295	6.59	gi|642931189|ref|XP_008196475.1|PREDICTED: glutathione S-transferase theta-1 [Tribolium castaneum]	56.76	9e-88
c11605_g1_i4	c11605_g1_i4|m.9296	6.37	gi|270011813|gb|EFA08261.1|hypothetical protein TcasGA2_TC005889 [Tribolium castaneum]	74.34	3e-146
c11605_g1_i4	c11605_g1_i4|m.9297	6.37	gi|642931189|ref|XP_008196475.1|PREDICTED: glutathione S-transferase theta-1 [Tribolium castaneum]	56.76	9e-88
c11607_g1_i1	c11607_g1_i1|m.9302	46.44	gi|91083675|ref|XP_968367.1|PREDICTED: serine/threonine-protein kinase PINK1, mitochondrial [Tribolium castaneum]	61.21	0
c11608_g1_i1	c11608_g1_i1|m.9303	2.45	gi|91077170|ref|XP_972058.1|PREDICTED: protein AAR2 homolog [Tribolium castaneum]	51.08	3e-134
c11609_g1_i1	c11609_g1_i1|m.9304	16.43	gi|913311776|ref|XP_013186583.1|PREDICTED: probable cytosolic iron-sulfur protein assembly protein Ciao1 isoform X1 [Amyelois transitella]	73.43	0
c11609_g2_i1	c11609_g2_i1|m.9306	12.25	gi|642936388|ref|XP_971879.2|PREDICTED: putative GTP cyclohydrolase 1 type 2 NIF3L1 isoform X2 [Tribolium castaneum]	55.92	5e-111
c11610_g1_i1	c11610_g1_i1|m.9307	113.79	gi|91078042|ref|XP_966587.1|PREDICTED: lipid storage droplets surface-binding protein 1-like isoform X1 [Tribolium castaneum]	51.55	6e-116
c11611_g1_i1	c11611_g1_i1|m.9308	1.48	gi|642933341|ref|XP_008197374.1|PREDICTED: probable serine hydrolase [Tribolium castaneum]	50	2e-101
c11611_g1_i2	c11611_g1_i2|m.9309	1.69	gi|642933341|ref|XP_008197374.1|PREDICTED: probable serine hydrolase [Tribolium castaneum]	50	2e-101
c11611_g2_i1	c11611_g2_i1|m.9310	1.78	gi|642933341|ref|XP_008197374.1|PREDICTED: probable serine hydrolase [Tribolium castaneum]	57.77	5e-124
c11612_g1_i1	c11612_g1_i1|m.9311	13.05	gi|91087767|ref|XP_975031.1|PREDICTED: vacuolar protein sorting-associated protein 28 homolog [Tribolium castaneum]	87.79	1e-136
c11613_g1_i1	c11613_g1_i1|m.9312	2.05	gi|642934329|ref|XP_008198604.1|PREDICTED: tripartite motif-containing protein 2 isoform X2 [Tribolium castaneum]	74.96	0
c11613_g1_i2	c11613_g1_i2|m.9313	2.33	gi|642934335|ref|XP_969733.2|PREDICTED: tripartite motif-containing protein 2 isoform X5 [Tribolium castaneum]	77.6	0
c11615_g1_i1	c11615_g1_i1|m.9315	1.82	gi|642917587|ref|XP_008191269.1|PREDICTED: zinc finger matrin-type protein 5 [Tribolium castaneum]	61.08	1e-61
c11615_g1_i2	c11615_g1_i2|m.9316	1.35	gi|642917587|ref|XP_008191269.1|PREDICTED: zinc finger matrin-type protein 5 [Tribolium castaneum]	61.08	1e-61
c11616_g1_i1	c11616_g1_i1|m.9317	1.5	gi|642915323|ref|XP_008190571.1|PREDICTED: valine--tRNA ligase [Tribolium castaneum]	58.57	0
c11617_g1_i1	c11617_g1_i1|m.9319	1.92	gi|642917699|ref|XP_008191335.1|PREDICTED: mitogen-activated protein kinase kinase kinase kinase 5 isoform X5 [Tribolium castaneum]	86.54	0
c11617_g1_i2	c11617_g1_i2|m.9320	1.67	gi|642917703|ref|XP_008191337.1|PREDICTED: mitogen-activated protein kinase kinase kinase kinase 5 isoform X7 [Tribolium castaneum]	85.14	0
c11617_g1_i3	c11617_g1_i3|m.9321	1.46	gi|642917699|ref|XP_008191335.1|PREDICTED: mitogen-activated protein kinase kinase kinase kinase 5 isoform X5 [Tribolium castaneum]	85.14	0
c11617_g1_i4	c11617_g1_i4|m.9322	1.55	gi|642917693|ref|XP_008191332.1|PREDICTED: mitogen-activated protein kinase kinase kinase kinase 5 isoform X2 [Tribolium castaneum]	85.04	0
c11618_g1_i1	c11618_g1_i1|m.9323	8.47	gi|642915518|ref|XP_968660.2|PREDICTED: syntaxin-8 [Tribolium castaneum]	54.39	3e-81
c11619_g1_i1	c11619_g1_i1|m.9325	20.59	gi|642917480|ref|XP_008191219.1|PREDICTED: probable RNA-binding protein 18 [Tribolium castaneum]	65.41	3e-80
c11620_g1_i3	c11620_g1_i3|m.9328	3.18	gi|546678084|gb|ERL88800.1|hypothetical protein D910_06182 [Dendroctonus ponderosae]	52.38	2e-21
c11621_g1_i1	c11621_g1_i1|m.9329	8.26	gi|270000732|gb|EEZ97179.1|hypothetical protein TcasGA2_TC004366 [Tribolium castaneum]	79.08	0
c11621_g1_i2	c11621_g1_i2|m.9330	6.94	gi|270000732|gb|EEZ97179.1|hypothetical protein TcasGA2_TC004366 [Tribolium castaneum]	76.23	0
c11621_g1_i2	c11621_g1_i2|m.9331	6.94	gi|478262550|gb|ENN81182.1|hypothetical protein YQE_02409, partial [Dendroctonus ponderosae]	78.01	1e-54
c11621_g1_i3	c11621_g1_i3|m.9332	7.65	gi|270000732|gb|EEZ97179.1|hypothetical protein TcasGA2_TC004366 [Tribolium castaneum]	76.23	0
c11621_g1_i3	c11621_g1_i3|m.9333	7.65	gi|478262550|gb|ENN81182.1|hypothetical protein YQE_02409, partial [Dendroctonus ponderosae]	78.01	1e-54
c11621_g1_i4	c11621_g1_i4|m.9334	6.84	gi|270000732|gb|EEZ97179.1|hypothetical protein TcasGA2_TC004366 [Tribolium castaneum]	76.94	0
c11621_g1_i4	c11621_g1_i4|m.9335	6.84	gi|478262550|gb|ENN81182.1|hypothetical protein YQE_02409, partial [Dendroctonus ponderosae]	78.01	1e-54
c11621_g1_i5	c11621_g1_i5|m.9336	6.51	gi|270000732|gb|EEZ97179.1|hypothetical protein TcasGA2_TC004366 [Tribolium castaneum]	76.23	0
c11621_g1_i5	c11621_g1_i5|m.9337	6.51	gi|478262550|gb|ENN81182.1|hypothetical protein YQE_02409, partial [Dendroctonus ponderosae]	78.01	1e-54
c11623_g1_i1	c11623_g1_i1|m.9340	3.23	gi|91076374|ref|XP_967954.1|PREDICTED: DNA ligase 3 [Tribolium castaneum]	61.63	0
c11624_g1_i1	c11624_g1_i1|m.9341	28.15	gi|642925622|ref|XP_008194644.1|PREDICTED: polypeptide N-acetylgalactosaminyltransferase 1 [Tribolium castaneum]	72.63	0
c11625_g1_i1	c11625_g1_i1|m.9342	1.18	gi|91093789|ref|XP_967550.1|PREDICTED: protein SON [Tribolium castaneum]	55.23	0
c11625_g1_i2	c11625_g1_i2|m.9343	1.32	gi|91093789|ref|XP_967550.1|PREDICTED: protein SON [Tribolium castaneum]	50	8e-135
c11625_g1_i2	c11625_g1_i2|m.9344	1.32	gi|478250909|gb|ENN71394.1|hypothetical protein YQE_11898, partial [Dendroctonus ponderosae]	74.81	9e-59
c11627_g1_i1	c11627_g1_i1|m.9348	137.77	gi|91078482|ref|XP_975769.1|PREDICTED: cytochrome b-c1 complex subunit 2, mitochondrial [Tribolium castaneum]	53.12	1e-159
c11628_g1_i1	c11628_g1_i1|m.9350	40.61	gi|642921254|ref|XP_008192785.1|PREDICTED: FK506-binding protein 59 [Tribolium castaneum]	68.82	0
c11628_g1_i2	c11628_g1_i2|m.9351	43.25	gi|642921254|ref|XP_008192785.1|PREDICTED: FK506-binding protein 59 [Tribolium castaneum]	66.92	0
c11629_g1_i1	c11629_g1_i1|m.9352	21.33	gi|642924017|ref|XP_008193970.1|PREDICTED: dnaJ homolog subfamily C member 2 [Tribolium castaneum]	68.67	0
c11630_g1_i1	c11630_g1_i1|m.9353	39.79	gi|91093953|ref|XP_966436.1|PREDICTED: uncharacterized protein LOC655909 isoform X2 [Tribolium castaneum]	53.43	4e-82
c11631_g1_i1	c11631_g1_i1|m.9354	36.67	gi|91092830|ref|XP_968086.1|PREDICTED: prefoldin subunit 6 [Tribolium castaneum]	56.88	7e-36
c11632_g1_i1	c11632_g1_i1|m.9355	44.15	gi|91080711|ref|XP_975322.1|PREDICTED: syntaxin-5 [Tribolium castaneum]	76.06	0
c11633_g1_i1	c11633_g1_i1|m.9356	40.33	gi|91076522|ref|XP_973518.1|PREDICTED: programmed cell death protein 4 isoform X1 [Tribolium castaneum]	70.8	0
c11634_g1_i1	c11634_g1_i1|m.9357	24.24	gi|91088249|ref|XP_966392.1|PREDICTED: myosin-IA [Tribolium castaneum]	73.96	0
c11635_g1_i1	c11635_g1_i1|m.9359	48.8	gi|751451211|ref|XP_011179924.1|PREDICTED: 26S protease regulatory subunit 8 [Bactrocera cucurbitae]	98.02	0
c11636_g1_i1	c11636_g1_i1|m.9360	321.62	gi|91079020|ref|XP_974879.1|PREDICTED: staphylococcal nuclease domain-containing protein 1 [Tribolium castaneum]	73.03	0
c11638_g1_i1	c11638_g1_i1|m.9365	5.69	gi|646717553|gb|KDR20367.1|Coiled-coil domain-containing protein 94 [Zootermopsis nevadensis]	64.2	3e-119
c11639_g1_i1	c11639_g1_i1|m.9366	3.59	gi|91091464|ref|XP_973095.1|PREDICTED: threonine aspartase 1 [Tribolium castaneum]	64.91	2e-159
c11640_g1_i1	c11640_g1_i1|m.9368	4.39	gi|642921713|ref|XP_008194794.1|PREDICTED: transcription factor Sp4-like, partial [Tribolium castaneum]	76.07	1e-134
c11641_g1_i1	c11641_g1_i1|m.9369	57.27	gi|546684832|gb|ERL94414.1|hypothetical protein D910_11692 [Dendroctonus ponderosae]	74.45	0
c11641_g1_i1	c11641_g1_i1|m.9370	57.27	gi|242009305|ref|XP_002425430.1|Arginyl-tRNA synthetase, putative [Pediculus humanus corporis]	50.93	3e-21
c11643_g1_i2	c11643_g1_i2|m.9376	11.21	gi|646689328|gb|KDR06550.1|Zinc finger X-linked protein ZXDB [Zootermopsis nevadensis]	51.03	5e-100
c11644_g1_i1	c11644_g1_i1|m.9377	7.45	gi|478256935|gb|ENN77104.1|hypothetical protein YQE_06439, partial [Dendroctonus ponderosae]	67.04	2e-132
c11645_g1_i1	c11645_g1_i1|m.9378	10.49	gi|357606890|gb|EHJ65272.1|hypothetical protein KGM_04993 [Danaus plexippus]	52.94	5e-12
c11646_g1_i1	c11646_g1_i1|m.9379	270.02	gi|387175137|gb|AFJ66833.1|Z9 acylCoA desaturase [Chauliognathus lugubris]	76.62	0
c11647_g1_i1	c11647_g1_i1|m.9380	15.06	gi|665800430|ref|XP_008548179.1|PREDICTED: AN1-type zinc finger protein 6-like [Microplitis demolitor]	66.33	9e-82
c11647_g1_i2	c11647_g1_i2|m.9382	13.4	gi|665800430|ref|XP_008548179.1|PREDICTED: AN1-type zinc finger protein 6-like [Microplitis demolitor]	64.71	2e-79
c11647_g1_i3	c11647_g1_i3|m.9384	16	gi|665800430|ref|XP_008548179.1|PREDICTED: AN1-type zinc finger protein 6-like [Microplitis demolitor]	66.33	9e-82
c11648_g1_i1	c11648_g1_i1|m.9386	4.66	gi|112983816|ref|NP_001037386.1|glyceraldehyde-3-phosphate dehydrogenase [Bombyx mori]	75.35	4e-72
c11648_g1_i2	c11648_g1_i2|m.9387	11.29	gi|815815757|ref|XP_012228948.1|PREDICTED: glyceraldehyde-3-phosphate dehydrogenase 1 [Linepithema humile]	72.89	0
c11649_g1_i1	c11649_g1_i1|m.9388	72.11	gi|357624935|gb|EHJ75523.1|putative Collagen alpha-1V chain [Danaus plexippus]	53.29	3e-09
c11650_g1_i1	c11650_g1_i1|m.9389	2.8	gi|91079768|ref|XP_966889.1|PREDICTED: 15-hydroxyprostaglandin dehydrogenase [NAD(+)] [Tribolium castaneum]	53.64	6e-34
c11650_g1_i2	c11650_g1_i2|m.9391	5.49	gi|546675023|gb|ERL86286.1|hypothetical protein D910_03695 [Dendroctonus ponderosae]	50	3e-15
c11653_g1_i1	c11653_g1_i1|m.9393	11.57	gi|195435764|ref|XP_002065849.1|GK17689 [Drosophila willistoni]	83.75	1e-147
c11653_g1_i2	c11653_g1_i2|m.9394	15.88	gi|195127882|ref|XP_002008396.1|GI13471 [Drosophila mojavensis]	74.93	0
c11654_g1_i1	c11654_g1_i1|m.9395	13	gi|91094071|ref|XP_970215.1|PREDICTED: probable cytochrome P450 6a14 isoform X1 [Tribolium castaneum]	54.85	5e-92
c11654_g1_i2	c11654_g1_i2|m.9396	135.92	gi|270016189|gb|EFA12637.1|cytochrome P450 6BK1 [Tribolium castaneum]	50.21	1e-169
c11654_g1_i3	c11654_g1_i3|m.9397	3.54	gi|642938947|ref|XP_970556.2|PREDICTED: cytochrome P450 6a2 [Tribolium castaneum]	50.86	1e-33
c11654_g1_i4	c11654_g1_i4|m.9398	13.64	gi|642938947|ref|XP_970556.2|PREDICTED: cytochrome P450 6a2 [Tribolium castaneum]	50	2e-33
c11657_g1_i1	c11657_g1_i1|m.9403	4.06	gi|189233577|ref|XP_968497.2|PREDICTED: protein capicua homolog isoform X1 [Tribolium castaneum]	60.54	0
c11658_g1_i1	c11658_g1_i1|m.9404	12.05	gi|478250910|gb|ENN71395.1|hypothetical protein YQE_11899, partial [Dendroctonus ponderosae]	59.29	7e-168
c11659_g1_i1	c11659_g1_i1|m.9405	1.74	gi|546681461|gb|ERL91558.1|hypothetical protein D910_08888 [Dendroctonus ponderosae]	87.1	0
c11659_g1_i2	c11659_g1_i2|m.9406	1.98	gi|91083325|ref|XP_974870.1|PREDICTED: E3 ubiquitin-protein ligase MIB1 [Tribolium castaneum]	90.74	0
c11660_g1_i1	c11660_g1_i1|m.9407	3.68	gi|91085437|ref|XP_968834.1|PREDICTED: protein zyg-11 homolog [Tribolium castaneum]	63.55	0
c11661_g1_i1	c11661_g1_i1|m.9409	40.16	gi|909575171|ref|XP_013143310.1|PREDICTED: adenylosuccinate lyase [Papilio polytes]	75.57	0
c11665_g1_i1	c11665_g1_i1|m.9413	3.34	gi|91079360|ref|XP_970234.1|PREDICTED: armadillo repeat-containing protein 8 [Tribolium castaneum]	74.68	0
c11665_g1_i2	c11665_g1_i2|m.9414	3.35	gi|91079360|ref|XP_970234.1|PREDICTED: armadillo repeat-containing protein 8 [Tribolium castaneum]	71.41	0
c11665_g1_i3	c11665_g1_i3|m.9415	2.8	gi|91079360|ref|XP_970234.1|PREDICTED: armadillo repeat-containing protein 8 [Tribolium castaneum]	71.85	0
c11666_g1_i1	c11666_g1_i1|m.9416	7.71	gi|91093150|ref|XP_970085.1|PREDICTED: ribosomal protein S6 kinase alpha-5 isoform X1 [Tribolium castaneum]	73.25	0
c11667_g1_i1	c11667_g1_i1|m.9417	4.15	gi|642928090|ref|XP_008200152.1|PREDICTED: ATP-dependent RNA helicase DDX24 [Tribolium castaneum]	57.27	0
c11667_g1_i2	c11667_g1_i2|m.9418	4.46	gi|642928090|ref|XP_008200152.1|PREDICTED: ATP-dependent RNA helicase DDX24 [Tribolium castaneum]	57.27	0
c11670_g1_i1	c11670_g1_i1|m.9429	8.19	gi|270010710|gb|EFA07158.1|hypothetical protein TcasGA2_TC010153 [Tribolium castaneum]	86.39	0
c11671_g1_i2	c11671_g1_i2|m.9432	2.7	gi|270003496|gb|EEZ99943.1|hypothetical protein TcasGA2_TC002739 [Tribolium castaneum]	60.87	3e-20
c11672_g1_i1	c11672_g1_i1|m.9434	2.76	gi|642937760|ref|XP_008198934.1|PREDICTED: mortality factor 4-like protein 1 [Tribolium castaneum]	75.36	8e-110
c11672_g2_i1	c11672_g2_i1|m.9435	2.99	gi|642937760|ref|XP_008198934.1|PREDICTED: mortality factor 4-like protein 1 [Tribolium castaneum]	76.78	0
c11673_g1_i1	c11673_g1_i1|m.9436	2.06	gi|478263181|gb|ENN81574.1|hypothetical protein YQE_02103, partial [Dendroctonus ponderosae]	52.17	2e-59
c11674_g1_i1	c11674_g1_i1|m.9437	2.69	gi|91080645|ref|XP_974525.1|PREDICTED: KIF1-binding protein homolog [Tribolium castaneum]	60.57	0
c11675_g1_i1	c11675_g1_i1|m.9438	310.32	gi|270015550|gb|EFA11998.1|hypothetical protein TcasGA2_TC005191 [Tribolium castaneum]	82.13	0
c11675_g2_i1	c11675_g2_i1|m.9440	178.56	gi|642939867|ref|XP_969882.2|PREDICTED: alpha-aminoadipic semialdehyde dehydrogenase [Tribolium castaneum]	65.26	4e-35
c11676_g1_i1	c11676_g1_i1|m.9441	2.26	gi|642937115|ref|XP_008198698.1|PREDICTED: uncharacterized protein LOC103314418 [Tribolium castaneum]	58.33	0
c11677_g1_i1	c11677_g1_i1|m.9442	8.78	gi|91094199|ref|XP_971496.1|PREDICTED: probable DNA-directed RNA polymerase III subunit RPC6 [Tribolium castaneum]	72.66	8e-152
c11678_g1_i1	c11678_g1_i1|m.9444	12.05	gi|195449709|ref|XP_002072190.1|GK22715 [Drosophila willistoni]	50.75	7e-54
c11681_g1_i1	c11681_g1_i1|m.9447	9.63	gi|189237947|ref|XP_001811565.1|PREDICTED: probable serine/threonine-protein kinase ifkC [Tribolium castaneum]	55.94	0
c11683_g1_i1	c11683_g1_i1|m.9450	9.66	gi|270003176|gb|EEZ99623.1|hypothetical protein TcasGA2_TC002142 [Tribolium castaneum]	50.16	3e-96
c11684_g1_i1	c11684_g1_i1|m.9452	8.08	gi|91093683|ref|XP_970017.1|PREDICTED: 1-acyl-sn-glycerol-3-phosphate acyltransferase delta [Tribolium castaneum]	64.67	2e-68
c11684_g1_i2	c11684_g1_i2|m.9453	8.47	gi|91093683|ref|XP_970017.1|PREDICTED: 1-acyl-sn-glycerol-3-phosphate acyltransferase delta [Tribolium castaneum]	70.13	0
c11684_g1_i3	c11684_g1_i3|m.9454	7.89	gi|91093683|ref|XP_970017.1|PREDICTED: 1-acyl-sn-glycerol-3-phosphate acyltransferase delta [Tribolium castaneum]	70.13	0
c11684_g1_i4	c11684_g1_i4|m.9455	8.04	gi|91093683|ref|XP_970017.1|PREDICTED: 1-acyl-sn-glycerol-3-phosphate acyltransferase delta [Tribolium castaneum]	70.13	0
c11686_g2_i1	c11686_g2_i1|m.9458	77.89	gi|270016366|gb|EFA12812.1|hypothetical protein TcasGA2_TC001877 [Tribolium castaneum]	59.4	6e-82
c11686_g2_i2	c11686_g2_i2|m.9459	61.83	gi|546685109|gb|ERL94636.1|hypothetical protein D910_11911 [Dendroctonus ponderosae]	50.79	3e-59
c11687_g1_i1	c11687_g1_i1|m.9462	24.25	gi|91094127|ref|XP_968492.1|PREDICTED: probable aminopeptidase NPEPL1 [Tribolium castaneum]	75.1	0
c11688_g1_i1	c11688_g1_i1|m.9463	40.43	gi|646710641|gb|KDR16097.1|Sulfotransferase family cytosolic 1B member 1 [Zootermopsis nevadensis]	50	6e-23
c11688_g2_i1	c11688_g2_i1|m.9465	55.4	gi|91090336|ref|XP_966924.1|PREDICTED: sulfotransferase 1 family member D1 [Tribolium castaneum]	50.41	1e-33
c11689_g1_i1	c11689_g1_i1|m.9468	4.6	gi|91088643|ref|XP_974406.1|PREDICTED: uncharacterized protein LOC663257 [Tribolium castaneum]	53.07	2e-70
c11689_g1_i2	c11689_g1_i2|m.9469	4.48	gi|91088643|ref|XP_974406.1|PREDICTED: uncharacterized protein LOC663257 [Tribolium castaneum]	53.07	2e-70
c11690_g1_i1	c11690_g1_i1|m.9470	8.49	gi|642918336|ref|XP_008196857.1|PREDICTED: serine/threonine-protein kinase tricorner [Tribolium castaneum]	92.94	0
c11690_g1_i2	c11690_g1_i2|m.9471	6.66	gi|270003267|gb|EEZ99714.1|hypothetical protein TcasGA2_TC002475 [Tribolium castaneum]	96.95	0
c11690_g1_i2	c11690_g1_i2|m.9472	6.66	gi|91079913|ref|XP_966985.1|PREDICTED: transcription initiation factor TFIID subunit 11 [Tribolium castaneum]	64.32	1e-70
c11690_g2_i1	c11690_g2_i1|m.9473	3.26	gi|642918338|ref|XP_008196865.1|PREDICTED: sushi, nidogen and EGF-like domain-containing protein 1 [Tribolium castaneum]	63.03	2e-48
c11691_g1_i1	c11691_g1_i1|m.9474	1.79	gi|91091970|ref|XP_968583.1|PREDICTED: synaptotagmin-11 [Tribolium castaneum]	85.49	0
c11692_g1_i1	c11692_g1_i1|m.9475	1.33	gi|642926973|ref|XP_008195085.1|PREDICTED: rho guanine nucleotide exchange factor 18 isoform X2 [Tribolium castaneum]	72.66	0
c11692_g1_i2	c11692_g1_i2|m.9476	1.2	gi|642926973|ref|XP_008195085.1|PREDICTED: rho guanine nucleotide exchange factor 18 isoform X2 [Tribolium castaneum]	72.54	0
c11694_g1_i1	c11694_g1_i1|m.9478	4.6	gi|91085733|ref|XP_973505.1|PREDICTED: tRNA (cytosine(34)-C(5))-methyltransferase [Tribolium castaneum]	67.33	0
c11694_g1_i2	c11694_g1_i2|m.9479	5.03	gi|91085733|ref|XP_973505.1|PREDICTED: tRNA (cytosine(34)-C(5))-methyltransferase [Tribolium castaneum]	66.38	0
c11696_g1_i1	c11696_g1_i1|m.9481	83.67	gi|15811692|gb|AAL09065.1|AF420308_1aquaporin [Pyrocoelia rufa]	73.88	4e-130
c11697_g1_i1	c11697_g1_i1|m.9482	9.7	gi|642911006|ref|XP_008193505.1|PREDICTED: uncharacterized protein LOC662256 isoform X2 [Tribolium castaneum]	72.97	0
c11697_g1_i2	c11697_g1_i2|m.9483	14.87	gi|642911006|ref|XP_008193505.1|PREDICTED: uncharacterized protein LOC662256 isoform X2 [Tribolium castaneum]	72.97	0
c11697_g1_i3	c11697_g1_i3|m.9484	10.08	gi|642911006|ref|XP_008193505.1|PREDICTED: uncharacterized protein LOC662256 isoform X2 [Tribolium castaneum]	72.97	0
c11699_g1_i1	c11699_g1_i1|m.9486	3.85	gi|642929789|ref|XP_008195977.1|PREDICTED: oxysterol-binding protein-related protein 9 isoform X1 [Tribolium castaneum]	69.46	0
c11699_g1_i2	c11699_g1_i2|m.9487	3.16	gi|642929789|ref|XP_008195977.1|PREDICTED: oxysterol-binding protein-related protein 9 isoform X1 [Tribolium castaneum]	68.19	0
c11701_g1_i1	c11701_g1_i1|m.9488	8.98	gi|557470280|gb|AHA05990.1|truncated knickkopf 3 [Tribolium castaneum]	65.05	1e-174
c11701_g1_i2	c11701_g1_i2|m.9489	11.83	gi|642935032|ref|XP_008199913.1|PREDICTED: protein Skeletor, isoforms B/C isoform X2 [Tribolium castaneum]	64.02	1e-133
c11701_g1_i2	c11701_g1_i2|m.9490	11.83	gi|642935032|ref|XP_008199913.1|PREDICTED: protein Skeletor, isoforms B/C isoform X2 [Tribolium castaneum]	80.51	0
c11702_g1_i1	c11702_g1_i1|m.9491	8.5	gi|546681992|gb|ERL91988.1|hypothetical protein D910_09311 [Dendroctonus ponderosae]	59.73	3e-88
c11702_g1_i1	c11702_g1_i1|m.9492	8.5	gi|91081785|ref|XP_973657.1|PREDICTED: putative E3 ubiquitin-protein ligase UBR7 [Tribolium castaneum]	60.43	1e-49
c11704_g1_i1	c11704_g1_i1|m.9495	5.39	gi|91088439|ref|XP_968151.1|PREDICTED: uncharacterized protein LOC656533 [Tribolium castaneum]	61.17	1e-87
c11705_g1_i1	c11705_g1_i1|m.9496	13.52	gi|307203784|gb|EFN82720.1|Splicing factor, arginine/serine-rich 1 [Harpegnathos saltator]	81.35	1e-102
c11705_g1_i2	c11705_g1_i2|m.9497	13.76	gi|571573590|ref|XP_006559268.1|PREDICTED: serine/arginine-rich splicing factor 1-like [Apis mellifera]	82.25	1e-122
c11707_g1_i1	c11707_g1_i1|m.9499	25.46	gi|91095041|ref|XP_971778.1|PREDICTED: cysteine-rich with EGF-like domain protein 2 [Tribolium castaneum]	61.64	3e-166
c11708_g1_i1	c11708_g1_i1|m.9500	39.14	gi|91093927|ref|XP_976373.1|PREDICTED: uncharacterized protein LOC661127 [Tribolium castaneum]	50.34	2e-38
c11709_g1_i1	c11709_g1_i1|m.9501	56.77	gi|805762586|ref|XP_012154310.1|PREDICTED: cystinosin homolog isoform X1 [Megachile rotundata]	50.29	2e-120
c11712_g1_i1	c11712_g1_i1|m.9504	5.19	gi|642936375|ref|XP_971546.2|PREDICTED: WW domain-binding protein 4 isoform X2 [Tribolium castaneum]	50.23	1e-70
c11712_g1_i2	c11712_g1_i2|m.9505	8.41	gi|642936375|ref|XP_971546.2|PREDICTED: WW domain-binding protein 4 isoform X2 [Tribolium castaneum]	52.74	1e-94
c11714_g1_i1	c11714_g1_i1|m.9507	126.7	gi|642911771|ref|XP_008200734.1|PREDICTED: transketolase-like protein 2 isoform X2 [Tribolium castaneum]	78.4	0
c11714_g1_i2	c11714_g1_i2|m.9508	118.27	gi|642911769|ref|XP_967219.2|PREDICTED: transketolase-like protein 2 isoform X1 [Tribolium castaneum]	79.17	0
c11717_g1_i1	c11717_g1_i1|m.9510	70.97	gi|91086141|ref|XP_969127.1|PREDICTED: protein SEC13 homolog [Tribolium castaneum]	77.45	9e-178
[truncated: 12,030 more rows]

## Sheet: KEGG_50%identity
Transcript ID	Transdecoder ID	FPKM	Protein function	Category
c10013_g1_i1	c10013_g1_i1|m.6571	17.43	sialic acid synthase [EC:2.5.1.56 2.5.1.57]	Metabolism
c10017_g1_i1	c10017_g1_i1|m.6579	2.44	plexin A	Cellular Processes
c10021_g1_i1	c10021_g1_i1|m.6596	6.53	sphingosine kinase [EC:2.7.1.91]	Metabolism
c1003_g2_i1	c1003_g2_i1|m.281	0.93	glucuronosyltransferase [EC:2.4.1.17]	Metabolism
c10030_g1_i1	c10030_g1_i1|m.6608	11.64	pseudouridine-5'-phosphate glycosidase / pseudouridine kinase [EC:3.2.-.- 2.7.1.83]	Metabolism
c10032_g1_i1	c10032_g1_i1|m.6610	34.46	charged multivesicular body protein 5	Cellular Processes
c10033_g1_i1	c10033_g1_i1|m.6611	30.36	RING-box protein 1	Genetic Information Processing
c10036_g1_i1	c10036_g1_i1|m.6614	31.33	solute carrier family 3, member 2	Cellular Processes
c10038_g1_i1	c10038_g1_i1|m.6616	58.07	dihydrodiol dehydrogenase / D-xylose 1-dehydrogenase (NADP) [EC:1.3.1.20 1.1.1.179]	Metabolism
c10042_g1_i2	c10042_g1_i2|m.6621	2.89	inositol-hexakisphosphate 5-kinase [EC:2.7.4.21]	Environmental Information Processing
c10045_g1_i1	c10045_g1_i1|m.6626	317.5	ubiquitin C	Cellular Processes
c10045_g1_i2	c10045_g1_i2|m.6627	285.41	ubiquitin C	Cellular Processes
c10047_g1_i1	c10047_g1_i1|m.6629	1.71	pancreatic triacylglycerol lipase [EC:3.1.1.3]	Metabolism
c10047_g2_i1	c10047_g2_i1|m.6630	1.65	pancreatic triacylglycerol lipase [EC:3.1.1.3]	Metabolism
c10051_g1_i1	c10051_g1_i1|m.6635	1.82	snurportin-1	Genetic Information Processing
c10052_g1_i1	c10052_g1_i1|m.6636	14.23	multiple inositol-polyphosphate phosphatase / 2,3-bisphosphoglycerate 3-phosphatase [EC:3.1.3.62 3.1.3.80]	Metabolism
c10054_g1_i1	c10054_g1_i1|m.6638	27.96	proteasome maturation protein	Genetic Information Processing
c10056_g1_i1	c10056_g1_i1|m.6639	8.18	enolase-phosphatase E1 [EC:3.1.3.77]	Metabolism
c10056_g1_i2	c10056_g1_i2|m.6641	13.2	enolase-phosphatase E1 [EC:3.1.3.77]	Metabolism
c10059_g1_i1	c10059_g1_i1|m.6645	540.15	small subunit ribosomal protein S26e	Genetic Information Processing
c10061_g1_i1	c10061_g1_i1|m.6647	136.63	signal peptidase complex subunit 3 [EC:3.4.-.-]	Genetic Information Processing
c10065_g1_i1	c10065_g1_i1|m.6651	2.95	glycosylphosphatidylinositol deacylase [EC:3.-.-.-]	Metabolism
c10066_g1_i1	c10066_g1_i1|m.6654	1.33	complexin-1/2	Cellular Processes
c10066_g1_i2	c10066_g1_i2|m.6655	2.1	complexin-1/2	Cellular Processes
c10066_g1_i3	c10066_g1_i3|m.6656	1.13	complexin-1/2	Cellular Processes
c10073_g1_i1	c10073_g1_i1|m.6667	166.7	peroxiredoxin 5, atypical 2-Cys peroxiredoxin [EC:1.11.1.15]	Cellular Processes
c10075_g1_i1	c10075_g1_i1|m.6672	12.43	GTPase KRas	Environmental Information Processing
c10077_g1_i1	c10077_g1_i1|m.6673	4.24	ditrans,polycis-polyprenyl diphosphate synthase [EC:2.5.1.87]	Metabolism
c10078_g1_i1	c10078_g1_i1|m.6675	17.04	large subunit ribosomal protein L1	Genetic Information Processing
c10079_g1_i1	c10079_g1_i1|m.6676	108.62	ubiquinol-cytochrome c reductase cytochrome c1 subunit	Metabolism
c10080_g1_i1	c10080_g1_i1|m.6677	3.92	N-acetylglucosamine-6-phosphate deacetylase [EC:3.5.1.25]	Metabolism
c10089_g2_i1	c10089_g2_i1|m.6691	2.92	glycoprotein 3-alpha-L-fucosyltransferase [EC:2.4.1.214]	Metabolism
c10091_g1_i1	c10091_g1_i1|m.6695	48.94	eukaryotic translation initiation factor 4E binding protein 2	Genetic Information Processing
c10092_g1_i1	c10092_g1_i1|m.6696	61.29	very-long-chain enoyl-CoA reductase [EC:1.3.1.93]	Metabolism
c10094_g1_i1	c10094_g1_i1|m.6697	1.72	E3 ubiquitin-protein ligase NRDP1 [EC:2.3.2.27]	Cellular Processes
c10094_g1_i2	c10094_g1_i2|m.6698	1.63	E3 ubiquitin-protein ligase NRDP1 [EC:2.3.2.27]	Cellular Processes
c10096_g1_i1	c10096_g1_i1|m.6701	1.71	synaptotagmin-1	Cellular Processes
c10096_g1_i2	c10096_g1_i2|m.6702	1.72	synaptotagmin-1	Cellular Processes
c10100_g1_i1	c10100_g1_i1|m.6707	20.76	large subunit ribosomal protein L2	Genetic Information Processing
c10103_g1_i1	c10103_g1_i1|m.6710	164.93	F-type H+-transporting ATPase subunit g	Metabolism
c10104_g1_i1	c10104_g1_i1|m.6711	2.39	ATP-binding cassette, subfamily C (CFTR/MRP), member 4	Environmental Information Processing
c10105_g1_i1	c10105_g1_i1|m.6712	5.18	NAD+ synthase (glutamine-hydrolysing) [EC:6.3.5.1]	Metabolism
c10108_g1_i1	c10108_g1_i1|m.6715	34.02	charged multivesicular body protein 1	Cellular Processes
c10109_g1_i1	c10109_g1_i1|m.6716	5.55	disintegrin and metalloproteinase domain-containing protein 17 [EC:3.4.24.86]	Environmental Information Processing
c10112_g1_i1	c10112_g1_i1|m.6721	6.96	unconventional SNARE in the endoplasmic reticulum protein 1	Genetic Information Processing
c10117_g1_i1	c10117_g1_i1|m.6729	3.9	guanine nucleotide-binding protein subunit beta, other	Cellular Processes
c10117_g1_i2	c10117_g1_i2|m.6730	2.72	guanine nucleotide-binding protein subunit beta, other	Cellular Processes
c10123_g1_i1	c10123_g1_i1|m.6739	2	cytochrome-b5 reductase [EC:1.6.2.2]	Metabolism
c10123_g2_i1	c10123_g2_i1|m.6740	2.14	cytochrome-b5 reductase [EC:1.6.2.2]	Metabolism
c10126_g1_i1	c10126_g1_i1|m.6752	2.6	phosphoglycolate phosphatase [EC:3.1.3.18 3.1.3.48]	Metabolism
c10127_g1_i1	c10127_g1_i1|m.6753	41.88	ubiquitin-conjugating enzyme E2 G1 [EC:2.3.2.23]	Genetic Information Processing
c10128_g1_i1	c10128_g1_i1|m.6755	145.64	lysosomal-associated membrane protein 1/2	Cellular Processes
c10129_g1_i2	c10129_g1_i2|m.6757	4.73	cytoplasmic polyadenylation element-binding protein	Cellular Processes
c10129_g1_i3	c10129_g1_i3|m.6758	4.42	cytoplasmic polyadenylation element-binding protein	Cellular Processes
c10129_g1_i4	c10129_g1_i4|m.6759	3.84	cytoplasmic polyadenylation element-binding protein	Cellular Processes
c10132_g1_i1	c10132_g1_i1|m.6763	27.2	RuvB-like protein 1 (pontin 52)	Environmental Information Processing
c10138_g1_i1	c10138_g1_i1|m.6771	2.88	sphingomyelin phosphodiesterase [EC:3.1.4.12]	Metabolism
c10142_g1_i1	c10142_g1_i1|m.6780	1.48	cyclin-dependent kinase 5 [EC:2.7.11.22]	Cellular Processes
c10142_g1_i2	c10142_g1_i2|m.6781	1.19	cyclin-dependent kinase 5 [EC:2.7.11.22]	Cellular Processes
c10147_g1_i1	c10147_g1_i1|m.6785	98.9	alpha-amylase [EC:3.2.1.1]	Metabolism
c10147_g2_i1	c10147_g2_i1|m.6786	6.66	alpha-amylase [EC:3.2.1.1]	Metabolism
c10147_g4_i1	c10147_g4_i1|m.6787	7.84	alpha-amylase [EC:3.2.1.1]	Metabolism
c10149_g1_i1	c10149_g1_i1|m.6789	2240.87	small subunit ribosomal protein S2e	Genetic Information Processing
c10152_g1_i1	c10152_g1_i1|m.6791	9.7	DNA-directed RNA polymerases I, II, and III subunit RPABC3	Metabolism
c10152_g1_i2	c10152_g1_i2|m.6792	5.8	DNA-directed RNA polymerases I, II, and III subunit RPABC3	Metabolism
c10152_g1_i4	c10152_g1_i4|m.6793	11.93	DNA-directed RNA polymerases I, II, and III subunit RPABC3	Metabolism
c10157_g1_i1	c10157_g1_i1|m.6799	21.07	transcription initiation factor TFIIF subunit beta [EC:3.6.4.12]	Genetic Information Processing
c10160_g1_i1	c10160_g1_i1|m.6801	19.11	small subunit ribosomal protein S11	Genetic Information Processing
c10162_g1_i1	c10162_g1_i1|m.6806	6.99	syntaxin 17	Genetic Information Processing
c10162_g1_i2	c10162_g1_i2|m.6807	3.61	syntaxin 17	Genetic Information Processing
c10167_g1_i1	c10167_g1_i1|m.6814	3.32	kelch-like protein 19	Genetic Information Processing
c10167_g1_i1	c10167_g1_i1|m.6815	3.32	kelch-like protein 19	Genetic Information Processing
c10167_g1_i3	c10167_g1_i3|m.6816	3.73	kelch-like protein 19	Genetic Information Processing
c10167_g1_i4	c10167_g1_i4|m.6817	3.29	kelch-like protein 19	Genetic Information Processing
c10177_g1_i1	c10177_g1_i1|m.6830	9.73	mitochondrial trans-2-enoyl-CoA reductase [EC:1.3.1.38]	Metabolism
c10178_g1_i1	c10178_g1_i1|m.6831	44.85	2-oxo-4-hydroxy-4-carboxy-5-ureidoimidazoline decarboxylase [EC:4.1.1.97]	Metabolism
c10182_g1_i1	c10182_g1_i1|m.6834	24.02	polyprenyldihydroxybenzoate methyltransferase / 3-demethylubiquinol 3-O-methyltransferase [EC:2.1.1.114 2.1.1.64]	Metabolism
c10186_g1_i1	c10186_g1_i1|m.6840	2.88	DNA replication licensing factor MCM3 [EC:3.6.4.12]	Genetic Information Processing
c10187_g1_i1	c10187_g1_i1|m.6841	5.49	autophagy-related protein 16, animal type	Cellular Processes
c10187_g1_i2	c10187_g1_i2|m.6842	4.19	autophagy-related protein 16, animal type	Cellular Processes
c10191_g1_i1	c10191_g1_i1|m.6846	38.21	syndecan 2	Environmental Information Processing
c10193_g1_i1	c10193_g1_i1|m.6848	2.47	folylpolyglutamate synthase [EC:6.3.2.17]	Metabolism
c10193_g1_i2	c10193_g1_i2|m.6849	1.36	folylpolyglutamate synthase [EC:6.3.2.17]	Metabolism
c10196_g1_i2	c10196_g1_i2|m.6852	7.45	pre-mRNA cleavage complex 2 protein Pcf11	Genetic Information Processing
c10198_g1_i1	c10198_g1_i1|m.6854	46.05	hsp70-interacting protein	Genetic Information Processing
c10202_g1_i1	c10202_g1_i1|m.6858	9.76	mitogen-activated protein kinase-activated protein kinase 2 [EC:2.7.11.1]	Environmental Information Processing
c10209_g1_i1	c10209_g1_i1|m.6868	1.84	Ras GTPase-activating protein 1	Environmental Information Processing
c10209_g1_i2	c10209_g1_i2|m.6869	1.93	Ras GTPase-activating protein 1	Environmental Information Processing
c10214_g1_i1	c10214_g1_i1|m.6874	3.87	adenylate cyclase 10 [EC:4.6.1.1]	Metabolism
c10214_g1_i2	c10214_g1_i2|m.6875	3.73	adenylate cyclase 10 [EC:4.6.1.1]	Metabolism
c10216_g1_i2	c10216_g1_i2|m.6876	7.76	cleavage and polyadenylation specificity factor subunit 5	Genetic Information Processing
c10216_g1_i3	c10216_g1_i3|m.6877	6.2	cleavage and polyadenylation specificity factor subunit 5	Genetic Information Processing
c10216_g1_i4	c10216_g1_i4|m.6878	7.22	cleavage and polyadenylation specificity factor subunit 5	Genetic Information Processing
c10218_g1_i1	c10218_g1_i1|m.6881	632.75	secretory phospholipase A2 [EC:3.1.1.4]	Metabolism
c10220_g1_i1	c10220_g1_i1|m.6882	3.36	DNA excision repair protein ERCC-1	Genetic Information Processing
c10220_g1_i2	c10220_g1_i2|m.6883	5.42	DNA excision repair protein ERCC-1	Genetic Information Processing
c10227_g1_i1	c10227_g1_i1|m.6891	47.18	protein transport protein SEC31	Genetic Information Processing
c10229_g1_i1	c10229_g1_i1|m.6894	40.84	26S proteasome regulatory subunit T4	Genetic Information Processing
c10230_g1_i1	c10230_g1_i1|m.6895	36.76	U4/U6.U5 tri-snRNP-associated protein 3	Genetic Information Processing
c10236_g1_i1	c10236_g1_i1|m.6909	2.1	smoothened	Environmental Information Processing
c10236_g1_i1	c10236_g1_i1|m.6910	2.1	smoothened	Environmental Information Processing
c1024_g1_i1	c1024_g1_i1|m.284	4.97	forkhead box protein A2, hepatocyte nuclear factor 3-beta	Cellular Processes
c10240_g1_i3	c10240_g1_i3|m.6916	4.52	dynactin 6	Cellular Processes
c10241_g1_i1	c10241_g1_i1|m.6917	2	folliculin	Cellular Processes
c10241_g1_i2	c10241_g1_i2|m.6918	2.01	folliculin	Cellular Processes
c10244_g1_i1	c10244_g1_i1|m.6921	2.78	aubergine	Cellular Processes
c10244_g1_i2	c10244_g1_i2|m.6922	2.59	aubergine	Cellular Processes
c10254_g1_i1	c10254_g1_i1|m.6942	15.35	sphingolipid delta-4 desaturase [EC:1.14.-.-]	Metabolism
c10254_g1_i1	c10254_g1_i1|m.6943	15.35	sphingolipid delta-4 desaturase [EC:1.14.-.-]	Metabolism
c10254_g1_i2	c10254_g1_i2|m.6944	19.6	sphingolipid delta-4 desaturase [EC:1.14.-.-]	Metabolism
c10254_g1_i3	c10254_g1_i3|m.6945	15.18	sphingolipid delta-4 desaturase [EC:1.14.-.-]	Metabolism
c10255_g1_i1	c10255_g1_i1|m.6946	1.77	protein SMG6 [EC:3.1.-.-]	Genetic Information Processing
c10255_g1_i2	c10255_g1_i2|m.6948	2.07	protein SMG6 [EC:3.1.-.-]	Genetic Information Processing
c10258_g1_i1	c10258_g1_i1|m.6953	4.52	ethylmalonyl-CoA/methylmalonyl-CoA decarboxylase [EC:4.1.1.94 4.1.1.41]	Metabolism
c10258_g1_i2	c10258_g1_i2|m.6954	6.02	ethylmalonyl-CoA/methylmalonyl-CoA decarboxylase [EC:4.1.1.94 4.1.1.41]	Metabolism
c10260_g2_i1	c10260_g2_i1|m.6959	4.89	serine/threonine-protein kinase Chk2 [EC:2.7.11.1]	Cellular Processes
c10267_g1_i1	c10267_g1_i1|m.6972	5.53	cyclin H	Genetic Information Processing
c10270_g1_i1	c10270_g1_i1|m.6986	7.67	frataxin [EC:1.16.3.1]	Metabolism
c10271_g1_i1	c10271_g1_i1|m.6987	7.96	dynein intermediate chain, cytosolic	Cellular Processes
c10271_g1_i3	c10271_g1_i3|m.6988	8.31	dynein intermediate chain, cytosolic	Cellular Processes
c10271_g1_i4	c10271_g1_i4|m.6989	2.56	dynein intermediate chain, cytosolic	Cellular Processes
c10271_g1_i5	c10271_g1_i5|m.6990	2.15	dynein intermediate chain, cytosolic	Cellular Processes
c10275_g1_i1	c10275_g1_i1|m.6993	12.09	transcription initiation factor TFIIB	Genetic Information Processing
c10276_g1_i1	c10276_g1_i1|m.6994	23.85	synaptobrevin homolog YKT6	Genetic Information Processing
c10282_g1_i1	c10282_g1_i1|m.7006	1.33	ubiquitin carboxyl-terminal hydrolase 8 [EC:3.4.19.12]	Cellular Processes
c10282_g1_i2	c10282_g1_i2|m.7007	2.46	ubiquitin carboxyl-terminal hydrolase 8 [EC:3.4.19.12]	Cellular Processes
c1029_g1_i1	c1029_g1_i1|m.285	8.61	copper chaperone for superoxide dismutase	Cellular Processes
c10294_g1_i1	c10294_g1_i1|m.7026	2.12	FAD synthetase [EC:2.7.7.2]	Metabolism
c10294_g1_i3	c10294_g1_i3|m.7027	3.79	FAD synthetase [EC:2.7.7.2]	Metabolism
c10300_g1_i1	c10300_g1_i1|m.7033	27.28	E3 ubiquitin-protein ligase RNF5 [EC:2.3.2.27]	Genetic Information Processing
c10300_g1_i2	c10300_g1_i2|m.7034	21.25	E3 ubiquitin-protein ligase RNF5 [EC:2.3.2.27]	Genetic Information Processing
c10302_g1_i1	c10302_g1_i1|m.7035	5.67	purine-nucleoside phosphorylase [EC:2.4.2.1]	Metabolism
c10302_g1_i2	c10302_g1_i2|m.7036	4.83	purine-nucleoside phosphorylase [EC:2.4.2.1]	Metabolism
c10305_g1_i1	c10305_g1_i1|m.7039	1044.19	small subunit ribosomal protein S6e	Genetic Information Processing
c10312_g1_i1	c10312_g1_i1|m.7051	617.96	V-type H+-transporting ATPase 16kDa proteolipid subunit	Metabolism
c10317_g1_i1	c10317_g1_i1|m.7059	4.75	phosphatidylinositol glycan, class F [EC:2.7.-.-]	Metabolism
c10319_g1_i1	c10319_g1_i1|m.7061	17.72	glutamate--cysteine ligase regulatory subunit	Metabolism
c10331_g1_i1	c10331_g1_i1|m.7082	37.32	very long chain acyl-CoA dehydrogenase [EC:1.3.8.9]	Metabolism
c10331_g1_i1	c10331_g1_i1|m.7083	37.32	very long chain acyl-CoA dehydrogenase [EC:1.3.8.9]	Metabolism
c10333_g1_i1	c10333_g1_i1|m.7086	1.42	DNA polymerase beta [EC:2.7.7.7 4.2.99.-]	Genetic Information Processing
c10333_g1_i1	c10333_g1_i1|m.7087	1.42	DNA polymerase beta [EC:2.7.7.7 4.2.99.-]	Genetic Information Processing
c10333_g1_i2	c10333_g1_i2|m.7088	1.91	DNA polymerase beta [EC:2.7.7.7 4.2.99.-]	Genetic Information Processing
c10337_g1_i1	c10337_g1_i1|m.7096	5.44	cytoplasmic FMR1 interacting protein	Genetic Information Processing
c10337_g1_i2	c10337_g1_i2|m.7098	3.4	cytoplasmic FMR1 interacting protein	Genetic Information Processing
c10337_g1_i3	c10337_g1_i3|m.7099	2.68	cytoplasmic FMR1 interacting protein	Genetic Information Processing
c10337_g1_i4	c10337_g1_i4|m.7100	5.71	cytoplasmic FMR1 interacting protein	Genetic Information Processing
c10340_g1_i1	c10340_g1_i1|m.7105	4.71	ubiquitin thioesterase CYLD [EC:3.4.19.12]	Cellular Processes
c10348_g1_i1	c10348_g1_i1|m.7112	11.85	inositol-1,3,4-trisphosphate 5/6-kinase / inositol-tetrakisphosphate 1-kinase [EC:2.7.1.159 2.7.1.134]	Metabolism
c10350_g1_i1	c10350_g1_i1|m.7114	27.89	ATP-binding cassette, subfamily D (ALD), member 3	Environmental Information Processing
c1036_g1_i1	c1036_g1_i1|m.290	3.36	nuclear RNA export factor	Genetic Information Processing
c10370_g1_i1	c10370_g1_i1|m.7158	113.73	UV excision repair protein RAD23	Genetic Information Processing
c10371_g1_i1	c10371_g1_i1|m.7159	89.97	aminoacylase [EC:3.5.1.14]	Metabolism
c10375_g1_i1	c10375_g1_i1|m.7164	4.7	protein xylosyltransferase [EC:2.4.2.26]	Metabolism
c10377_g1_i1	c10377_g1_i1|m.7169	207.84	F-type H+-transporting ATPase subunit gamma	Metabolism
c10380_g1_i1	c10380_g1_i1|m.7172	2.24	transcription factor 7-like 2	Environmental Information Processing
c10380_g1_i2	c10380_g1_i2|m.7174	2.24	transcription factor 7-like 2	Environmental Information Processing
c10382_g1_i1	c10382_g1_i1|m.7177	24.45	glutathione S-transferase [EC:2.5.1.18]	Metabolism
c10383_g1_i1	c10383_g1_i1|m.7178	8.87	vrille	Cellular Processes
c10391_g1_i1	c10391_g1_i1|m.7192	15.39	RIO kinase 2 [EC:2.7.11.1]	Genetic Information Processing
c10392_g1_i1	c10392_g1_i1|m.7193	322.94	tyrosine 3-monooxygenase [EC:1.14.16.2]	Metabolism
c10396_g1_i1	c10396_g1_i1|m.7199	4.02	L-xylulose reductase [EC:1.1.1.10]	Metabolism
c10396_g1_i2	c10396_g1_i2|m.7200	3.88	L-xylulose reductase [EC:1.1.1.10]	Metabolism
c104_g1_i1	c104_g1_i1|m.32	0.93	glucuronosyltransferase [EC:2.4.1.17]	Metabolism
c1040_g1_i1	c1040_g1_i1|m.292	1104.25	large subunit ribosomal protein L23Ae	Genetic Information Processing
c10401_g1_i1	c10401_g1_i1|m.7207	14.94	ribulose-phosphate 3-epimerase [EC:5.1.3.1]	Metabolism
c10401_g1_i2	c10401_g1_i2|m.7208	17.48	ribulose-phosphate 3-epimerase [EC:5.1.3.1]	Metabolism
c10403_g1_i1	c10403_g1_i1|m.7214	13.28	mitogen-activated protein kinase kinase 1 [EC:2.7.12.2]	Environmental Information Processing
c10404_g1_i1	c10404_g1_i1|m.7215	43.21	20S proteasome subunit alpha 1 [EC:3.4.25.1]	Genetic Information Processing
c10406_g1_i1	c10406_g1_i1|m.7217	6.7	ethanolamine kinase [EC:2.7.1.82]	Metabolism
c10406_g1_i1	c10406_g1_i1|m.7218	6.7	ethanolamine kinase [EC:2.7.1.82]	Metabolism
c10406_g1_i2	c10406_g1_i2|m.7219	7.89	ethanolamine kinase [EC:2.7.1.82]	Metabolism
c10406_g1_i3	c10406_g1_i3|m.7220	7.69	ethanolamine kinase [EC:2.7.1.82]	Metabolism
c10406_g1_i4	c10406_g1_i4|m.7221	5.72	ethanolamine kinase [EC:2.7.1.82]	Metabolism
c10409_g1_i1	c10409_g1_i1|m.7229	2.14	dolichyldiphosphatase [EC:3.6.1.43]	Metabolism
c10409_g1_i2	c10409_g1_i2|m.7230	2.26	dolichyldiphosphatase [EC:3.6.1.43]	Metabolism
c10410_g1_i1	c10410_g1_i1|m.7231	11.5	DNA-directed RNA polymerases I and III subunit RPAC1	Metabolism
c10419_g1_i1	c10419_g1_i1|m.7242	3.11	trypsin [EC:3.4.21.4]	Environmental Information Processing
c10419_g1_i2	c10419_g1_i2|m.7243	2.49	trypsin [EC:3.4.21.4]	Environmental Information Processing
c10423_g1_i1	c10423_g1_i1|m.7247	50.89	translation initiation factor 4G	Genetic Information Processing
c10432_g1_i1	c10432_g1_i1|m.7266	907.6	large subunit ribosomal protein L3e	Genetic Information Processing
c10441_g2_i1	c10441_g2_i1|m.7275	2.15	insulin-like growth factor 2 mRNA-binding protein 1	Cellular Processes
c10441_g2_i2	c10441_g2_i2|m.7276	2.19	insulin-like growth factor 2 mRNA-binding protein 1	Cellular Processes
c10442_g1_i1	c10442_g1_i1|m.7277	23.04	integrin-linked kinase [EC:2.7.11.1]	Cellular Processes
c10443_g1_i1	c10443_g1_i1|m.7278	68.54	tyrosyl-tRNA synthetase [EC:6.1.1.1]	Genetic Information Processing
c10448_g1_i1	c10448_g1_i1|m.7286	10.85	alanine-glyoxylate transaminase / (R)-3-amino-2-methylpropionate-pyruvate transaminase [EC:2.6.1.44 2.6.1.40]	Metabolism
c10448_g1_i1	c10448_g1_i1|m.7287	10.85	alanine-glyoxylate transaminase / (R)-3-amino-2-methylpropionate-pyruvate transaminase [EC:2.6.1.44 2.6.1.40]	Metabolism
c10448_g1_i2	c10448_g1_i2|m.7288	12.62	alanine-glyoxylate transaminase / (R)-3-amino-2-methylpropionate-pyruvate transaminase [EC:2.6.1.44 2.6.1.40]	Metabolism
c10448_g1_i3	c10448_g1_i3|m.7289	9.3	alanine-glyoxylate transaminase / (R)-3-amino-2-methylpropionate-pyruvate transaminase [EC:2.6.1.44 2.6.1.40]	Metabolism
c10448_g1_i3	c10448_g1_i3|m.7290	9.3	alanine-glyoxylate transaminase / (R)-3-amino-2-methylpropionate-pyruvate transaminase [EC:2.6.1.44 2.6.1.40]	Metabolism
c10448_g1_i4	c10448_g1_i4|m.7291	10.1	alanine-glyoxylate transaminase / (R)-3-amino-2-methylpropionate-pyruvate transaminase [EC:2.6.1.44 2.6.1.40]	Metabolism
c10448_g1_i4	c10448_g1_i4|m.7292	10.1	alanine-glyoxylate transaminase / (R)-3-amino-2-methylpropionate-pyruvate transaminase [EC:2.6.1.44 2.6.1.40]	Metabolism
c1045_g1_i1	c1045_g1_i1|m.297	2038.59	large subunit ribosomal protein L10e	Genetic Information Processing
c10450_g1_i1	c10450_g1_i1|m.7293	14.87	protein Tob/BTG	Genetic Information Processing
c10450_g1_i2	c10450_g1_i2|m.7294	15.79	protein Tob/BTG	Genetic Information Processing
c10452_g1_i1	c10452_g1_i1|m.7298	16.49	charged multivesicular body protein 6	Cellular Processes
c10454_g1_i1	c10454_g1_i1|m.7306	10.95	presenilin enhancer 2	Environmental Information Processing
c10455_g1_i1	c10455_g1_i1|m.7307	20.4	cortactin	Cellular Processes
c10456_g1_i1	c10456_g1_i1|m.7310	5.83	exosome complex component RRP41	Genetic Information Processing
c10458_g1_i1	c10458_g1_i1|m.7312	1.93	tyrosine-protein kinase Tec [EC:2.7.10.2]	Cellular Processes
c10458_g1_i2	c10458_g1_i2|m.7313	1.69	tyrosine-protein kinase Tec [EC:2.7.10.2]	Cellular Processes
c10458_g1_i3	c10458_g1_i3|m.7314	2.28	tyrosine-protein kinase Tec [EC:2.7.10.2]	Cellular Processes
c10462_g1_i1	c10462_g1_i1|m.7318	18.86	U3 small nucleolar RNA-associated protein 18	Genetic Information Processing
c10464_g1_i1	c10464_g1_i1|m.7320	21.34	transcription factor AP-1	Environmental Information Processing
c10466_g2_i1	c10466_g2_i1|m.7322	4.84	AP-1 complex subunit sigma 1/2	Cellular Processes
c10466_g2_i2	c10466_g2_i2|m.7323	6.75	AP-1 complex subunit sigma 1/2	Cellular Processes
c10470_g1_i1	c10470_g1_i1|m.7328	17.58	exosome complex exonuclease DIS3/RRP44 [EC:3.1.13.-]	Genetic Information Processing
c10473_g1_i1	c10473_g1_i1|m.7333	4.95	WD repeat-containing protein 48	Genetic Information Processing
c10474_g1_i1	c10474_g1_i1|m.7334	17.09	polyprenyldihydroxybenzoate methyltransferase / 3-demethylubiquinol 3-O-methyltransferase [EC:2.1.1.114 2.1.1.64]	Metabolism
c10474_g1_i2	c10474_g1_i2|m.7335	8.22	polyprenyldihydroxybenzoate methyltransferase / 3-demethylubiquinol 3-O-methyltransferase [EC:2.1.1.114 2.1.1.64]	Metabolism
c10477_g1_i1	c10477_g1_i1|m.7339	99.29	translation initiation factor 3 subunit I	Genetic Information Processing
c10481_g1_i2	c10481_g1_i2|m.7356	4.85	metalloproteinase inhibitor 3	Cellular Processes
c10481_g1_i3	c10481_g1_i3|m.7357	5.13	metalloproteinase inhibitor 3	Cellular Processes
c10482_g1_i1	c10482_g1_i1|m.7358	2.69	aromatic-L-amino-acid decarboxylase [EC:4.1.1.28]	Metabolism
c10489_g1_i1	c10489_g1_i1|m.7377	27.7	crystallin, alpha B	Genetic Information Processing
c10492_g1_i1	c10492_g1_i1|m.7380	8.82	sterol O-acyltransferase [EC:2.3.1.26]	Metabolism
c10495_g1_i1	c10495_g1_i1|m.7384	28.11	U1 small nuclear ribonucleoprotein C	Genetic Information Processing
c10496_g1_i1	c10496_g1_i1|m.7385	15.48	lysophospholipid acyltransferase 1/2 [EC:2.3.1.51 2.3.1.-]	Metabolism
c10506_g1_i1	c10506_g1_i1|m.7399	13.05	pinin	Genetic Information Processing
c10511_g1_i1	c10511_g1_i1|m.7404	7.07	WAS protein family homolog 1	Cellular Processes
c10515_g1_i1	c10515_g1_i1|m.7411	5.06	farnesyl diphosphate synthase [EC:2.5.1.1 2.5.1.10]	Metabolism
c10517_g1_i1	c10517_g1_i1|m.7413	3.03	exopolyphosphatase [EC:3.6.1.11]	Metabolism
c10522_g1_i1	c10522_g1_i1|m.7420	2.94	DNA-repair protein XRCC1	Genetic Information Processing
c10531_g1_i1	c10531_g1_i1|m.7437	4.64	TNF receptor-associated factor 6 [EC:2.3.2.27]	Genetic Information Processing
c10533_g1_i1	c10533_g1_i1|m.7440	1005.46	enoyl-CoA hydratase [EC:4.2.1.17]	Metabolism
c10536_g1_i1	c10536_g1_i1|m.7443	62.11	ubiquitin-like-conjugating enzyme ATG3	Cellular Processes
c10540_g1_i1	c10540_g1_i1|m.7448	47.65	Ras-related protein Rab-11A	Cellular Processes
c10540_g1_i2	c10540_g1_i2|m.7449	37.03	Ras-related protein Rab-11A	Cellular Processes
c10549_g2_i1	c10549_g2_i1|m.7464	1.29	chondroitin 4-sulfotransferase 11 [EC:2.8.2.5]	Metabolism
c10551_g1_i1	c10551_g1_i1|m.7466	1021.37	ornithine--oxo-acid transaminase [EC:2.6.1.13]	Metabolism
c10552_g1_i1	c10552_g1_i1|m.7467	70.84	high mobility group protein B1	Genetic Information Processing
c10553_g1_i1	c10553_g1_i1|m.7468	11.2	cullin 1	Genetic Information Processing
c10555_g1_i1	c10555_g1_i1|m.7472	6.22	xylosylprotein 4-beta-galactosyltransferase [EC:2.4.1.133]	Metabolism
c10559_g1_i1	c10559_g1_i1|m.7478	3.63	phosphatidate phosphatase LPIN [EC:3.1.3.4]	Metabolism
c10559_g1_i2	c10559_g1_i2|m.7479	2.94	phosphatidate phosphatase LPIN [EC:3.1.3.4]	Metabolism
c10559_g1_i3	c10559_g1_i3|m.7480	3.3	phosphatidate phosphatase LPIN [EC:3.1.3.4]	Metabolism
c10559_g1_i4	c10559_g1_i4|m.7481	3.71	phosphatidate phosphatase LPIN [EC:3.1.3.4]	Metabolism
c10559_g1_i5	c10559_g1_i5|m.7482	3.05	phosphatidate phosphatase LPIN [EC:3.1.3.4]	Metabolism
c10573_g1_i1	c10573_g1_i1|m.7496	1.86	beta-glucuronidase [EC:3.2.1.31]	Metabolism
c10573_g1_i2	c10573_g1_i2|m.7498	1.49	beta-glucuronidase [EC:3.2.1.31]	Metabolism
c10574_g1_i1	c10574_g1_i1|m.7500	1.87	alpha-amylase [EC:3.2.1.1]	Metabolism
c10575_g1_i1	c10575_g1_i1|m.7501	39.76	calmodulin	Environmental Information Processing
c10580_g1_i1	c10580_g1_i1|m.7520	32.85	U3 small nucleolar RNA-associated protein 5	Genetic Information Processing
c10585_g1_i1	c10585_g1_i1|m.7526	2.25	cyclin E	Environmental Information Processing
c10586_g1_i1	c10586_g1_i1|m.7527	3.01	homeobox protein homothorax	Environmental Information Processing
c10586_g1_i2	c10586_g1_i2|m.7530	2.34	homeobox protein homothorax	Environmental Information Processing
c10589_g1_i1	c10589_g1_i1|m.7534	47.99	pyruvate carboxylase [EC:6.4.1.1]	Metabolism
c10590_g1_i1	c10590_g1_i1|m.7536	11.73	cell division control protein 42	Environmental Information Processing
c10590_g1_i2	c10590_g1_i2|m.7537	11.92	cell division control protein 42	Environmental Information Processing
c10593_g1_i1	c10593_g1_i1|m.7541	20.33	serpin B	Cellular Processes
c10598_g1_i1	c10598_g1_i1|m.7552	1.14	alpha,alpha-trehalase [EC:3.2.1.28]	Metabolism
c10598_g1_i2	c10598_g1_i2|m.7553	1.73	alpha,alpha-trehalase [EC:3.2.1.28]	Metabolism
c10599_g1_i1	c10599_g1_i1|m.7554	118.06	stress-induced-phosphoprotein 1	Cellular Processes
c106_g1_i1	c106_g1_i1|m.35	0.82	chitinase [EC:3.2.1.14]	Metabolism
c1060_g1_i1	c1060_g1_i1|m.306	1.27	DNA primase small subunit [EC:2.7.7.-]	Metabolism
c10602_g1_i1	c10602_g1_i1|m.7559	49.03	gluconolactonase [EC:3.1.1.17]	Metabolism
c10607_g1_i1	c10607_g1_i1|m.7565	49.51	pyruvate dehydrogenase E2 component (dihydrolipoamide acetyltransferase) [EC:2.3.1.12]	Metabolism
c10609_g1_i1	c10609_g1_i1|m.7571	55.42	NADH-ubiquinone oxidoreductase chain 5 [EC:1.6.5.3]	Metabolism
c10610_g1_i1	c10610_g1_i1|m.7572	2.87	peroxin-1	Cellular Processes
c10617_g1_i1	c10617_g1_i1|m.7591	15.13	phosphopantetheine adenylyltransferase / dephospho-CoA kinase [EC:2.7.7.3 2.7.1.24]	Metabolism
c1062_g1_i1	c1062_g1_i1|m.307	1306.63	tropomyosin 1	Cellular Processes
c10629_g1_i1	c10629_g1_i1|m.7605	2.4	tyrosine-protein kinase Src [EC:2.7.10.2]	Environmental Information Processing
c10629_g1_i2	c10629_g1_i2|m.7606	3.01	tyrosine-protein kinase Src [EC:2.7.10.2]	Environmental Information Processing
c10629_g1_i3	c10629_g1_i3|m.7608	3.14	tyrosine-protein kinase Src [EC:2.7.10.2]	Environmental Information Processing
c1063_g1_i1	c1063_g1_i1|m.308	119.51	translation initiation factor 4B	Genetic Information Processing
c10634_g1_i1	c10634_g1_i1|m.7614	18.78	ESCRT-I complex subunit TSG101	Cellular Processes
c10637_g1_i4	c10637_g1_i4|m.7619	2.66	lysophosphatidate acyltransferase [EC:2.3.1.51]	Metabolism
c10646_g1_i1	c10646_g1_i1|m.7634	3.47	RING finger and CHY zinc finger domain-containing protein 1 [EC:2.3.2.27]	Genetic Information Processing
c10646_g1_i2	c10646_g1_i2|m.7635	4.21	RING finger and CHY zinc finger domain-containing protein 1 [EC:2.3.2.27]	Genetic Information Processing
c10650_g1_i1	c10650_g1_i1|m.7643	5.09	structural maintenance of chromosome 3 (chondroitin sulfate proteoglycan 6)	Cellular Processes
c10650_g1_i1	c10650_g1_i1|m.7644	5.09	structural maintenance of chromosome 3 (chondroitin sulfate proteoglycan 6)	Cellular Processes
c10656_g1_i1	c10656_g1_i1|m.7653	87.21	hyaluronoglucosaminidase [EC:3.2.1.35]	Metabolism
c10658_g1_i1	c10658_g1_i1|m.7657	19.18	aminoacylase [EC:3.5.1.14]	Metabolism
c10658_g1_i2	c10658_g1_i2|m.7658	22.6	aminoacylase [EC:3.5.1.14]	Metabolism
c10661_g1_i1	c10661_g1_i1|m.7662	15.76	synaptosomal-associated protein 29	Genetic Information Processing
c10661_g1_i2	c10661_g1_i2|m.7664	13.26	synaptosomal-associated protein 29	Genetic Information Processing
c10664_g1_i1	c10664_g1_i1|m.7669	1.48	crossover junction endonuclease EME1 [EC:3.1.22.-]	Genetic Information Processing
c10664_g1_i2	c10664_g1_i2|m.7672	1.53	crossover junction endonuclease EME1 [EC:3.1.22.-]	Genetic Information Processing
c10668_g1_i1	c10668_g1_i1|m.7678	18.42	phosphatidylinositol glycan, class P	Metabolism
c10669_g1_i1	c10669_g1_i1|m.7680	396.74	creatine kinase [EC:2.7.3.2]	Metabolism
c10670_g1_i1	c10670_g1_i1|m.7682	394.88	large subunit ribosomal protein L32e	Genetic Information Processing
c10671_g1_i1	c10671_g1_i1|m.7683	3.19	nuclear pore complex protein Nup37	Genetic Information Processing
c10673_g1_i1	c10673_g1_i1|m.7686	8.53	proliferating cell nuclear antigen	Genetic Information Processing
c10684_g1_i1	c10684_g1_i1|m.7699	11.43	mannose-1-phosphate guanylyltransferase [EC:2.7.7.13]	Metabolism
c10684_g1_i2	c10684_g1_i2|m.7700	7.93	mannose-1-phosphate guanylyltransferase [EC:2.7.7.13]	Metabolism
c10685_g1_i1	c10685_g1_i1|m.7701	12.97	small nuclear ribonucleoprotein D2	Genetic Information Processing
c10691_g1_i1	c10691_g1_i1|m.7708	67.97	seryl-tRNA synthetase [EC:6.1.1.11]	Genetic Information Processing
c10694_g1_i1	c10694_g1_i1|m.7712	65.94	pyruvate dehydrogenase E1 component alpha subunit [EC:1.2.4.1]	Metabolism
c10697_g1_i1	c10697_g1_i1|m.7714	86.02	signal recognition particle receptor subunit alpha	Genetic Information Processing
c10703_g1_i1	c10703_g1_i1|m.7723	9.53	alcohol-forming fatty acyl-CoA reductase [EC:1.2.1.84]	Metabolism
c10704_g1_i1	c10704_g1_i1|m.7725	16.8	DNA-directed RNA polymerase I subunit RPA12	Metabolism
c10711_g1_i1	c10711_g1_i1|m.7732	98.22	3-hydroxyacyl-CoA dehydrogenase [EC:1.1.1.35]	Metabolism
c10712_g1_i1	c10712_g1_i1|m.7734	6.04	guanine nucleotide-binding protein G(i) subunit alpha	Environmental Information Processing
c10714_g1_i1	c10714_g1_i1|m.7736	3.29	STE20-related kinase adapter protein alpha	Environmental Information Processing
c10715_g1_i1	c10715_g1_i1|m.7737	66.55	splicing factor, arginine/serine-rich 4/5/6	Genetic Information Processing
c10715_g1_i2	c10715_g1_i2|m.7739	46.38	splicing factor, arginine/serine-rich 4/5/6	Genetic Information Processing
c10717_g1_i1	c10717_g1_i1|m.7743	168.18	trimethyllysine dioxygenase [EC:1.14.11.8]	Metabolism
c1072_g1_i1	c1072_g1_i1|m.314	785.3	large subunit ribosomal protein L13e	Genetic Information Processing
c10720_g1_i1	c10720_g1_i1|m.7746	4.24	anaphase-promoting complex subunit 3	Genetic Information Processing
c10721_g1_i1	c10721_g1_i1|m.7747	5.14	glutathione S-transferase [EC:2.5.1.18]	Metabolism
c10728_g1_i1	c10728_g1_i1|m.7755	17.65	adenylosuccinate synthase [EC:6.3.4.4]	Metabolism
c10733_g1_i1	c10733_g1_i1|m.7763	14.48	cathepsin O [EC:3.4.22.42]	Cellular Processes
c10746_g1_i1	c10746_g1_i1|m.7787	28.57	translation initiation factor eIF-2B subunit delta	Genetic Information Processing
c10750_g1_i1	c10750_g1_i1|m.7794	14.9	AP-3 complex subunit mu	Cellular Processes
c10752_g1_i1	c10752_g1_i1|m.7797	4.8	DNA ligase 1 [EC:6.5.1.1 6.5.1.6 6.5.1.7]	Genetic Information Processing
c10754_g1_i1	c10754_g1_i1|m.7799	9.17	UDP-glucuronate decarboxylase [EC:4.1.1.35]	Metabolism
c10756_g1_i1	c10756_g1_i1|m.7800	5.39	THO complex subunit 7	Genetic Information Processing
c10756_g1_i2	c10756_g1_i2|m.7801	6.71	THO complex subunit 7	Genetic Information Processing
c10762_g1_i1	c10762_g1_i1|m.7816	7.24	ADP-ribosylation factor-binding protein GGA	Cellular Processes
c10770_g1_i1	c10770_g1_i1|m.7826	24.72	ATP-dependent RNA helicase UAP56/SUB2 [EC:3.6.4.13]	Genetic Information Processing
c10770_g1_i1	c10770_g1_i1|m.7827	24.72	ATP-dependent RNA helicase UAP56/SUB2 [EC:3.6.4.13]	Genetic Information Processing
c10770_g1_i2	c10770_g1_i2|m.7828	27.62	ATP-dependent RNA helicase UAP56/SUB2 [EC:3.6.4.13]	Genetic Information Processing
c10770_g1_i2	c10770_g1_i2|m.7829	27.62	ATP-dependent RNA helicase UAP56/SUB2 [EC:3.6.4.13]	Genetic Information Processing
c10770_g1_i3	c10770_g1_i3|m.7830	37.3	ATP-dependent RNA helicase UAP56/SUB2 [EC:3.6.4.13]	Genetic Information Processing
c10773_g1_i1	c10773_g1_i1|m.7836	41.5	L-gulonate 3-dehydrogenase [EC:1.1.1.45]	Metabolism
c10774_g1_i1	c10774_g1_i1|m.7837	11.14	small subunit ribosomal protein S6	Genetic Information Processing
c10775_g1_i1	c10775_g1_i1|m.7838	5.36	membrane-associated tyrosine- and threonine-specific cdc2-inhibitory kinase [EC:2.7.11.1]	Cellular Processes
c10780_g1_i1	c10780_g1_i1|m.7844	11.52	iodotyrosine deiodinase [EC:1.21.1.1]	Cellular Processes
c10780_g1_i2	c10780_g1_i2|m.7845	7.32	iodotyrosine deiodinase [EC:1.21.1.1]	Cellular Processes
c10782_g1_i1	c10782_g1_i1|m.7847	1.08	disabled homolog 2	Cellular Processes
c10783_g1_i1	c10783_g1_i1|m.7853	15.22	etoposide-induced 2.4 mRNA	Cellular Processes
c10789_g1_i1	c10789_g1_i1|m.7862	14.6	myeloid differentiation primary response protein MyD88	Environmental Information Processing
c10791_g1_i1	c10791_g1_i1|m.7864	59.19	serine/threonine-protein phosphatase 2A catalytic subunit [EC:3.1.3.16]	Genetic Information Processing
c10794_g1_i1	c10794_g1_i1|m.7866	3.46	pole hole	Environmental Information Processing
c10803_g1_i1	c10803_g1_i1|m.7876	9.18	delta-1-pyrroline-5-carboxylate synthetase [EC:2.7.2.11 1.2.1.41]	Metabolism
c10810_g1_i1	c10810_g1_i1|m.7885	12.52	mitochondrial inner membrane protease subunit 1 [EC:3.4.21.-]	Genetic Information Processing
c10811_g1_i1	c10811_g1_i1|m.7886	33.32	nicotinate phosphoribosyltransferase [EC:6.3.4.21]	Metabolism
c10815_g1_i1	c10815_g1_i1|m.7889	7.18	protein Mpv17	Cellular Processes
c10816_g1_i1	c10816_g1_i1|m.7890	39.8	flotillin	Cellular Processes
c10818_g1_i1	c10818_g1_i1|m.7894	85.8	transaldolase [EC:2.2.1.2]	Metabolism
c10821_g1_i1	c10821_g1_i1|m.7897	215.74	translation initiation factor 4A	Genetic Information Processing
c10821_g1_i2	c10821_g1_i2|m.7899	157.38	translation initiation factor 4A	Genetic Information Processing
c10822_g1_i1	c10822_g1_i1|m.7901	13.3	U3 small nucleolar ribonucleoprotein protein IMP3	Genetic Information Processing
c10825_g1_i1	c10825_g1_i1|m.7907	2.23	ubiquitin-conjugating enzyme E2 O [EC:2.3.2.24]	Genetic Information Processing
c10828_g1_i1	c10828_g1_i1|m.7912	2.45	multiple PDZ domain protein	Environmental Information Processing
c10832_g1_i2	c10832_g1_i2|m.7920	38.01	3,2-trans-enoyl-CoA isomerase, mitochondrial [EC:5.3.3.8]	Metabolism
c10833_g1_i1	c10833_g1_i1|m.7922	7	U3 small nucleolar RNA-associated protein 10	Genetic Information Processing
c10835_g1_i1	c10835_g1_i1|m.7924	167.42	S-adenosylmethionine synthetase [EC:2.5.1.6]	Metabolism
c10837_g2_i1	c10837_g2_i1|m.7927	2.36	CREB-regulated transcription coactivator 1	Cellular Processes
c10855_g1_i1	c10855_g1_i1|m.7964	3.3	ubiquitin-conjugating enzyme E2 Z [EC:2.3.2.23]	Genetic Information Processing
c10855_g1_i2	c10855_g1_i2|m.7965	7.91	ubiquitin-conjugating enzyme E2 Z [EC:2.3.2.23]	Genetic Information Processing
c10856_g1_i2	c10856_g1_i2|m.7966	20.72	tyrosine aminotransferase [EC:2.6.1.5]	Metabolism
c10863_g1_i1	c10863_g1_i1|m.7975	42.05	maleylacetoacetate isomerase [EC:5.2.1.2]	Metabolism
c10864_g1_i1	c10864_g1_i1|m.7976	2.3	ubiquitin-conjugating enzyme E2 Q [EC:2.3.2.23]	Genetic Information Processing
c10868_g1_i1	c10868_g1_i1|m.7985	39.62	dihydropyrimidine dehydrogenase (NADP+) [EC:1.3.1.2]	Metabolism
c10871_g1_i1	c10871_g1_i1|m.7988	12.27	large subunit ribosomal protein L17	Genetic Information Processing
c10873_g1_i1	c10873_g1_i1|m.7996	23.44	ethanolaminephosphotransferase [EC:2.7.8.1]	Metabolism
c10874_g1_i1	c10874_g1_i1|m.7997	5.05	glutathione synthase [EC:6.3.2.3]	Metabolism
c10874_g1_i2	c10874_g1_i2|m.7998	6.12	glutathione synthase [EC:6.3.2.3]	Metabolism
c10874_g1_i2	c10874_g1_i2|m.7999	6.12	glutathione synthase [EC:6.3.2.3]	Metabolism
c10876_g1_i1	c10876_g1_i1|m.8002	6.91	transcription initiation factor TFIID subunit 9B	Genetic Information Processing
c10879_g2_i1	c10879_g2_i1|m.8012	1.99	YEATS domain-containing protein 1/3	Cellular Processes
c10881_g1_i1	c10881_g1_i1|m.8015	17.68	golgi SNAP receptor complex member 1	Genetic Information Processing
c10882_g1_i1	c10882_g1_i1|m.8016	66.21	alpha-aminoadipic semialdehyde synthase [EC:1.5.1.8 1.5.1.9]	Metabolism
c10883_g1_i1	c10883_g1_i1|m.8017	26.91	cell division cycle protein 37	Environmental Information Processing
c10884_g1_i1	c10884_g1_i1|m.8018	43.27	peroxisomal membrane protein 2	Cellular Processes
c10889_g1_i1	c10889_g1_i1|m.8025	1.64	guanine nucleotide-binding protein G(o) subunit alpha	Environmental Information Processing
c10889_g1_i2	c10889_g1_i2|m.8026	2.05	guanine nucleotide-binding protein G(o) subunit alpha	Environmental Information Processing
c10890_g1_i1	c10890_g1_i1|m.8027	134.7	4-aminobutyrate aminotransferase / (S)-3-amino-2-methylpropionate transaminase [EC:2.6.1.19 2.6.1.22]	Metabolism
c10893_g1_i1	c10893_g1_i1|m.8029	53.5	programmed cell death 6-interacting protein	Cellular Processes
c10896_g1_i1	c10896_g1_i1|m.8033	4.74	WASH complex subunit CCDC53	Cellular Processes
c10896_g1_i2	c10896_g1_i2|m.8036	5.57	WASH complex subunit CCDC53	Cellular Processes
c10898_g1_i1	c10898_g1_i1|m.8038	13.44	CBF1 interacting corepressor	Environmental Information Processing
c10901_g1_i1	c10901_g1_i1|m.8041	12.1	ubiquitin thioesterase OTU1 [EC:3.1.2.-]	Genetic Information Processing
c10905_g1_i1	c10905_g1_i1|m.8048	6.33	nuclear cap-binding protein subunit 1	Genetic Information Processing
c10905_g1_i1	c10905_g1_i1|m.8049	6.33	nuclear cap-binding protein subunit 1	Genetic Information Processing
c10910_g1_i1	c10910_g1_i1|m.8056	25.53	Ras-related protein Rab-14	Environmental Information Processing
c10912_g1_i1	c10912_g1_i1|m.8057	5129.9	elongation factor 1-alpha	Genetic Information Processing
c10913_g1_i1	c10913_g1_i1|m.8059	194.66	ethanolamine-phosphate phospho-lyase [EC:4.2.3.2]	Metabolism
c10918_g1_i1	c10918_g1_i1|m.8074	101.53	renin receptor	Cellular Processes
c10921_g1_i1	c10921_g1_i1|m.8079	3.88	protein glucosyltransferase [EC:2.4.1.-]	Metabolism
c10923_g1_i1	c10923_g1_i1|m.8082	20.3	phospholipase A-2-activating protein	Genetic Information Processing
c10923_g1_i1	c10923_g1_i1|m.8083	20.3	NADH dehydrogenase (ubiquinone) 1 beta subcomplex subunit 7	Metabolism
c10924_g1_i1	c10924_g1_i1|m.8084	8.83	gamma-glutamyltranspeptidase / glutathione hydrolase / leukotriene-C4 hydrolase [EC:2.3.2.2 3.4.19.13 3.4.19.14]	Metabolism
c10924_g1_i2	c10924_g1_i2|m.8086	8.76	gamma-glutamyltranspeptidase / glutathione hydrolase / leukotriene-C4 hydrolase [EC:2.3.2.2 3.4.19.13 3.4.19.14]	Metabolism
c10926_g1_i1	c10926_g1_i1|m.8089	18.26	exportin-1	Genetic Information Processing
c10929_g1_i1	c10929_g1_i1|m.8092	69.3	complement component 1 Q subcomponent-binding protein, mitochondrial	Cellular Processes
c10929_g1_i2	c10929_g1_i2|m.8093	77.5	complement component 1 Q subcomponent-binding protein, mitochondrial	Cellular Processes
c10932_g1_i1	c10932_g1_i1|m.8096	1224.76	large subunit ribosomal protein L7Ae	Genetic Information Processing
c10933_g1_i1	c10933_g1_i1|m.8097	72.87	2-oxoisovalerate dehydrogenase E1 component alpha subunit [EC:1.2.4.4]	Metabolism
c10935_g1_i1	c10935_g1_i1|m.8100	219.58	trypsin [EC:3.4.21.4]	Environmental Information Processing
c10936_g1_i1	c10936_g1_i1|m.8101	40.41	signal recognition particle subunit SRP19	Genetic Information Processing
c10937_g1_i1	c10937_g1_i1|m.8102	7.65	catenin beta 1	Environmental Information Processing
c10937_g1_i2	c10937_g1_i2|m.8103	7.65	catenin beta 1	Environmental Information Processing
c10937_g1_i3	c10937_g1_i3|m.8104	7.7	catenin beta 1	Environmental Information Processing
c10943_g1_i1	c10943_g1_i1|m.8114	0.92	inositol-hexakisphosphate/diphosphoinositol-pentakisphosphate 1-kinase [EC:2.7.4.24]	Environmental Information Processing
c10943_g1_i2	c10943_g1_i2|m.8115	0.86	inositol-hexakisphosphate/diphosphoinositol-pentakisphosphate 1-kinase [EC:2.7.4.24]	Environmental Information Processing
c10943_g1_i3	c10943_g1_i3|m.8116	0.91	inositol-hexakisphosphate/diphosphoinositol-pentakisphosphate 1-kinase [EC:2.7.4.24]	Environmental Information Processing
c10943_g1_i4	c10943_g1_i4|m.8117	1.04	inositol-hexakisphosphate/diphosphoinositol-pentakisphosphate 1-kinase [EC:2.7.4.24]	Environmental Information Processing
c10943_g1_i5	c10943_g1_i5|m.8118	0.89	inositol-hexakisphosphate/diphosphoinositol-pentakisphosphate 1-kinase [EC:2.7.4.24]	Environmental Information Processing
c10943_g1_i6	c10943_g1_i6|m.8119	0.52	inositol-hexakisphosphate/diphosphoinositol-pentakisphosphate 1-kinase [EC:2.7.4.24]	Environmental Information Processing
c10945_g1_i1	c10945_g1_i1|m.8125	3.35	U2-associated protein SR140	Genetic Information Processing
c10945_g1_i2	c10945_g1_i2|m.8126	2.39	U2-associated protein SR140	Genetic Information Processing
c10945_g1_i3	c10945_g1_i3|m.8127	2.97	U2-associated protein SR140	Genetic Information Processing
c10945_g1_i4	c10945_g1_i4|m.8128	2.82	U2-associated protein SR140	Genetic Information Processing
c10947_g1_i1	c10947_g1_i1|m.8129	131.05	translation initiation factor 3 subunit F	Genetic Information Processing
c10952_g1_i1	c10952_g1_i1|m.8136	41.46	20S proteasome subunit alpha 7 [EC:3.4.25.1]	Genetic Information Processing
c10953_g1_i1	c10953_g1_i1|m.8137	38.09	vesicle transport protein SEC22	Genetic Information Processing
c10955_g1_i1	c10955_g1_i1|m.8140	4.62	guanylate kinase [EC:2.7.4.8]	Metabolism
c10955_g1_i2	c10955_g1_i2|m.8141	5.69	guanylate kinase [EC:2.7.4.8]	Metabolism
c10955_g1_i3	c10955_g1_i3|m.8142	5.15	guanylate kinase [EC:2.7.4.8]	Metabolism
c10956_g1_i1	c10956_g1_i1|m.8143	231.03	actinin alpha	Cellular Processes
c10962_g1_i1	c10962_g1_i1|m.8155	4.08	integrin beta 1	Environmental Information Processing
c10964_g1_i1	c10964_g1_i1|m.8157	2.9	beta-1,3-galactosyltransferase 1 [EC:2.4.1.-]	Metabolism
c10965_g1_i1	c10965_g1_i1|m.8159	7.44	syntaxin 6	Genetic Information Processing
c10971_g1_i1	c10971_g1_i1|m.8168	5.21	myosin-light-chain kinase [EC:2.7.11.18]	Environmental Information Processing
c10971_g1_i2	c10971_g1_i2|m.8169	3.36	myosin-light-chain kinase [EC:2.7.11.18]	Environmental Information Processing
c10973_g1_i1	c10973_g1_i1|m.8171	11.67	large subunit ribosomal protein L19	Genetic Information Processing
c10975_g2_i3	c10975_g2_i3|m.8178	2.09	MFS transporter, OCT family, solute carrier family 22 (organic cation transporter), member 4/5	Cellular Processes
c10981_g1_i1	c10981_g1_i1|m.8185	3.91	merlin	Environmental Information Processing
c10983_g1_i1	c10983_g1_i1|m.8188	6.47	UDPglucose--hexose-1-phosphate uridylyltransferase [EC:2.7.7.12]	Metabolism
c10984_g1_i1	c10984_g1_i1|m.8189	2.83	phosphatidylinositol glycan, class W [EC:2.3.-.-]	Metabolism
c10990_g1_i1	c10990_g1_i1|m.8201	29.29	spermidine synthase [EC:2.5.1.16]	Metabolism
c10994_g1_i1	c10994_g1_i1|m.8208	17.64	protein farnesyltransferase/geranylgeranyltransferase type-1 subunit alpha [EC:2.5.1.58 2.5.1.59]	Metabolism
c10996_g1_i2	c10996_g1_i2|m.8210	20.22	nuclear pore complex protein Nup50	Genetic Information Processing
c10997_g1_i2	c10997_g1_i2|m.8212	10.71	dihydropyrimidinase [EC:3.5.2.2]	Metabolism
c10997_g1_i2	c10997_g1_i2|m.8214	10.71	dihydropyrimidinase [EC:3.5.2.2]	Metabolism
c10997_g1_i3	c10997_g1_i3|m.8215	14.48	dihydropyrimidinase [EC:3.5.2.2]	Metabolism
c10997_g1_i4	c10997_g1_i4|m.8217	13.32	dihydropyrimidinase [EC:3.5.2.2]	Metabolism
c10997_g1_i5	c10997_g1_i5|m.8219	13.06	dihydropyrimidinase [EC:3.5.2.2]	Metabolism
c11008_g1_i1	c11008_g1_i1|m.8235	113.19	2-oxoglutarate dehydrogenase E2 component (dihydrolipoamide succinyltransferase) [EC:2.3.1.61]	Metabolism
c11021_g1_i1	c11021_g1_i1|m.8259	17.93	glycerol-3-phosphate dehydrogenase (NAD+) [EC:1.1.1.8]	Metabolism
c11021_g1_i2	c11021_g1_i2|m.8260	20.51	glycerol-3-phosphate dehydrogenase (NAD+) [EC:1.1.1.8]	Metabolism
c11024_g1_i1	c11024_g1_i1|m.8266	0.79	guanine nucleotide-binding protein subunit beta-5	Environmental Information Processing
c11024_g1_i2	c11024_g1_i2|m.8267	0.74	guanine nucleotide-binding protein subunit beta-5	Environmental Information Processing
c11024_g1_i3	c11024_g1_i3|m.8268	0.7	guanine nucleotide-binding protein subunit beta-5	Environmental Information Processing
c11024_g1_i4	c11024_g1_i4|m.8269	0.92	guanine nucleotide-binding protein subunit beta-5	Environmental Information Processing
c11024_g1_i4	c11024_g1_i4|m.8270	0.92	guanine nucleotide-binding protein subunit beta-5	Environmental Information Processing
c11030_g1_i1	c11030_g1_i1|m.8280	16.76	glucose-6-phosphate 1-epimerase [EC:5.1.3.15]	Metabolism
c11030_g1_i2	c11030_g1_i2|m.8281	17.61	glucose-6-phosphate 1-epimerase [EC:5.1.3.15]	Metabolism
c11031_g1_i1	c11031_g1_i1|m.8282	10.53	mRNA export factor	Genetic Information Processing
c11035_g1_i2	c11035_g1_i2|m.8285	4.04	ribonuclease HI [EC:3.1.26.4]	Genetic Information Processing
c11035_g1_i3	c11035_g1_i3|m.8288	3.79	ribonuclease HI [EC:3.1.26.4]	Genetic Information Processing
c11035_g1_i4	c11035_g1_i4|m.8290	4.07	ribonuclease HI [EC:3.1.26.4]	Genetic Information Processing
c11038_g1_i1	c11038_g1_i1|m.8294	9.36	forkhead box protein O3	Environmental Information Processing
c11045_g1_i1	c11045_g1_i1|m.8308	51.66	transcription initiation factor TFIID TATA-box-binding protein	Genetic Information Processing
c11046_g1_i1	c11046_g1_i1|m.8309	30.04	nonsense-mediated mRNA decay protein 3	Genetic Information Processing
c11053_g1_i1	c11053_g1_i1|m.8316	15.9	splicing factor 3A subunit 2	Genetic Information Processing
c11054_g1_i1	c11054_g1_i1|m.8317	23.82	aldehyde dehydrogenase (NAD+) [EC:1.2.1.3]	Metabolism
c11054_g1_i2	c11054_g1_i2|m.8318	22.57	aldehyde dehydrogenase (NAD+) [EC:1.2.1.3]	Metabolism
c11054_g1_i3	c11054_g1_i3|m.8319	22.15	aldehyde dehydrogenase (NAD+) [EC:1.2.1.3]	Metabolism
c1106_g1_i1	c1106_g1_i1|m.326	1.56	E3 ubiquitin-protein ligase UBR4 [EC:2.3.2.27]	Cellular Processes
c11060_g1_i1	c11060_g1_i1|m.8327	2.2	DNA polymerase eta [EC:2.7.7.7]	Genetic Information Processing
c11062_g1_i1	c11062_g1_i1|m.8330	7.54	U1 small nuclear ribonucleoprotein 70kDa	Genetic Information Processing
c11062_g1_i1	c11062_g1_i1|m.8332	7.54	U1 small nuclear ribonucleoprotein 70kDa	Genetic Information Processing
c11062_g1_i2	c11062_g1_i2|m.8333	14.84	U1 small nuclear ribonucleoprotein 70kDa	Genetic Information Processing
c11062_g1_i3	c11062_g1_i3|m.8335	9.11	U1 small nuclear ribonucleoprotein 70kDa	Genetic Information Processing
c11062_g1_i3	c11062_g1_i3|m.8337	9.11	U1 small nuclear ribonucleoprotein 70kDa	Genetic Information Processing
c11064_g1_i1	c11064_g1_i1|m.8339	9.5	prolactin regulatory element-binding protein	Genetic Information Processing
c11065_g1_i1	c11065_g1_i1|m.8340	147.65	cystathionine gamma-lyase [EC:4.4.1.1]	Metabolism
c11065_g1_i2	c11065_g1_i2|m.8341	109.53	cystathionine gamma-lyase [EC:4.4.1.1]	Metabolism
c11068_g1_i1	c11068_g1_i1|m.8348	52.71	serpin B	Cellular Processes
c11070_g1_i2	c11070_g1_i2|m.8352	16.6	lipopolysaccharide-induced tumor necrosis factor-alpha factor	Cellular Processes
c11072_g1_i1	c11072_g1_i1|m.8354	57.54	hydroxyacylglutathione hydrolase [EC:3.1.2.6]	Metabolism
c11073_g1_i1	c11073_g1_i1|m.8355	2.57	xylulokinase [EC:2.7.1.17]	Metabolism
c11073_g1_i2	c11073_g1_i2|m.8356	4.25	xylulokinase [EC:2.7.1.17]	Metabolism
c11075_g1_i1	c11075_g1_i1|m.8359	2.67	histone-lysine N-methyltransferase NSD1 [EC:2.1.1.43]	Metabolism
c11088_g1_i1	c11088_g1_i1|m.8382	7.07	ATP-binding cassette, subfamily B (MDR/TAP), member 6	Environmental Information Processing
c11088_g1_i2	c11088_g1_i2|m.8383	7.04	ATP-binding cassette, subfamily B (MDR/TAP), member 6	Environmental Information Processing
c11089_g1_i1	c11089_g1_i1|m.8384	33.22	cytochrome c heme-lyase [EC:4.4.1.17]	Metabolism
c11090_g1_i1	c11090_g1_i1|m.8385	9.01	splicing factor 3A subunit 1	Genetic Information Processing
c11094_g1_i1	c11094_g1_i1|m.8391	2.25	E3 ubiquitin-protein ligase HERC2 [EC:2.3.2.26]	Genetic Information Processing
c11095_g1_i1	c11095_g1_i1|m.8394	16.27	Wiskott-Aldrich syndrome protein	Cellular Processes
c11096_g1_i1	c11096_g1_i1|m.8395	409.98	protein disulfide-isomerase A1 [EC:5.3.4.1]	Genetic Information Processing
c11096_g1_i1	c11096_g1_i1|m.8397	409.98	protein disulfide-isomerase A1 [EC:5.3.4.1]	Genetic Information Processing
c11097_g3_i1	c11097_g3_i1|m.8398	1.54	glucuronyl/N-acetylglucosaminyl transferase EXT1 [EC:2.4.1.224 2.4.1.225]	Metabolism
c11098_g1_i1	c11098_g1_i1|m.8399	24.17	26S proteasome regulatory subunit N2	Genetic Information Processing
c11099_g1_i1	c11099_g1_i1|m.8400	20.06	Max protein	Environmental Information Processing
c11100_g1_i1	c11100_g1_i1|m.8401	59.33	heat shock 70kDa protein 1/8	Genetic Information Processing
c11101_g1_i1	c11101_g1_i1|m.8402	16.59	transcription initiation factor TFIIA large subunit	Genetic Information Processing
c11102_g1_i1	c11102_g1_i1|m.8403	10.6	structure-specific endonuclease subunit SLX1 [EC:3.6.1.-]	Genetic Information Processing
c11106_g1_i1	c11106_g1_i1|m.8408	41.14	translocation protein SEC63	Genetic Information Processing
c11111_g1_i1	c11111_g1_i1|m.8419	2.87	polycomb group RING finger protein 3	Cellular Processes
c11115_g1_i1	c11115_g1_i1|m.8424	14.35	adenine phosphoribosyltransferase [EC:2.4.2.7]	Metabolism
c11118_g1_i1	c11118_g1_i1|m.8427	38.74	26S proteasome regulatory subunit N8	Genetic Information Processing
c11119_g1_i1	c11119_g1_i1|m.8428	8.18	decaprenyl-diphosphate synthase subunit 1 [EC:2.5.1.91]	Metabolism
c11119_g1_i1	c11119_g1_i1|m.8429	8.18	large subunit ribosomal protein L32	Genetic Information Processing
c11119_g1_i2	c11119_g1_i2|m.8430	6.58	decaprenyl-diphosphate synthase subunit 1 [EC:2.5.1.91]	Metabolism
c11119_g1_i2	c11119_g1_i2|m.8431	6.58	large subunit ribosomal protein L32	Genetic Information Processing
c11121_g1_i1	c11121_g1_i1|m.8433	3.31	cystathionine beta-synthase [EC:4.2.1.22]	Metabolism
c11128_g2_i1	c11128_g2_i1|m.8447	1.59	gonadotropin-releasing hormone receptor	Environmental Information Processing
c11128_g2_i1	c11128_g2_i1|m.8448	1.59	small subunit ribosomal protein S1	Genetic Information Processing
c11128_g2_i2	c11128_g2_i2|m.8449	1.03	gonadotropin-releasing hormone receptor	Environmental Information Processing
c11128_g2_i2	c11128_g2_i2|m.8450	1.03	small subunit ribosomal protein S1	Genetic Information Processing
c11129_g1_i1	c11129_g1_i1|m.8451	22.26	tubulin alpha	Cellular Processes
c11129_g2_i1	c11129_g2_i1|m.8452	26.41	tubulin alpha	Cellular Processes
c11131_g2_i1	c11131_g2_i1|m.8457	3.69	prenyl protein peptidase [EC:3.4.22.-]	Metabolism
c11132_g2_i3	c11132_g2_i3|m.8462	3.94	DNA-repair protein XRCC3	Genetic Information Processing
c11133_g1_i1	c11133_g1_i1|m.8463	12.19	lysophosphatidate acyltransferase [EC:2.3.1.51]	Metabolism
c11133_g1_i2	c11133_g1_i2|m.8464	13.9	lysophosphatidate acyltransferase [EC:2.3.1.51]	Metabolism
c11133_g1_i3	c11133_g1_i3|m.8465	13.42	lysophosphatidate acyltransferase [EC:2.3.1.51]	Metabolism
c11134_g1_i1	c11134_g1_i1|m.8466	6.16	inositol-polyphosphate multikinase [EC:2.7.1.140 2.7.1.151]	Metabolism
c11134_g1_i2	c11134_g1_i2|m.8467	7.04	inositol-polyphosphate multikinase [EC:2.7.1.140 2.7.1.151]	Metabolism
c11136_g1_i2	c11136_g1_i2|m.8471	2.67	torso-like protein	Environmental Information Processing
c11140_g1_i1	c11140_g1_i1|m.8477	2.88	ubiquinone biosynthesis monooxygenase Coq7 [EC:1.14.13.-]	Metabolism
c11140_g1_i2	c11140_g1_i2|m.8478	3.99	ubiquinone biosynthesis monooxygenase Coq7 [EC:1.14.13.-]	Metabolism
c11141_g1_i1	c11141_g1_i1|m.8479	2.71	protein disulfide-isomerase A1 [EC:5.3.4.1]	Genetic Information Processing
c11141_g1_i1	c11141_g1_i1|m.8480	2.71	protein disulfide-isomerase A1 [EC:5.3.4.1]	Genetic Information Processing
c11148_g1_i1	c11148_g1_i1|m.8491	49.65	NADH dehydrogenase (ubiquinone) Fe-S protein 8 [EC:1.6.5.3 1.6.99.3]	Metabolism
c11149_g1_i1	c11149_g1_i1|m.8492	11.01	ADP-ribose pyrophosphatase [EC:3.6.1.13]	Metabolism
c11150_g1_i1	c11150_g1_i1|m.8493	41.13	methylthioribulose-1-phosphate dehydratase [EC:4.2.1.109]	Metabolism
c11151_g2_i1	c11151_g2_i1|m.8494	0.97	hyperpolarization activated cyclic nucleotide-gated potassium channel 2	Environmental Information Processing
c11151_g2_i3	c11151_g2_i3|m.8495	1.02	hyperpolarization activated cyclic nucleotide-gated potassium channel 2	Environmental Information Processing
c11152_g1_i1	c11152_g1_i1|m.8496	5.97	thrombospondin 2/3/4/5	Environmental Information Processing
c11156_g1_i1	c11156_g1_i1|m.8500	6.11	UDP-glucuronate decarboxylase [EC:4.1.1.35]	Metabolism
c11162_g1_i1	c11162_g1_i1|m.8507	109.17	L-lactate dehydrogenase [EC:1.1.1.27]	Metabolism
c11166_g1_i1	c11166_g1_i1|m.8511	6.24	E3 ubiquitin-protein ligase SIAH1 [EC:2.3.2.27]	Genetic Information Processing
c11166_g1_i2	c11166_g1_i2|m.8512	5.97	E3 ubiquitin-protein ligase SIAH1 [EC:2.3.2.27]	Genetic Information Processing
c11167_g1_i1	c11167_g1_i1|m.8513	9.47	N-acetylneuraminate lyase [EC:4.1.3.3]	Metabolism
c11167_g1_i2	c11167_g1_i2|m.8514	5.59	N-acetylneuraminate lyase [EC:4.1.3.3]	Metabolism
c11167_g1_i3	c11167_g1_i3|m.8515	6.57	N-acetylneuraminate lyase [EC:4.1.3.3]	Metabolism
c11171_g1_i1	c11171_g1_i1|m.8526	459.73	14-3-3 protein beta/theta/zeta	Environmental Information Processing
c11171_g1_i2	c11171_g1_i2|m.8527	525.49	14-3-3 protein beta/theta/zeta	Environmental Information Processing
c11172_g1_i1	c11172_g1_i1|m.8528	26.68	phosphoserine aminotransferase [EC:2.6.1.52]	Metabolism
c11173_g1_i1	c11173_g1_i1|m.8529	5.53	transcription initiation factor TFIIH subunit 2	Genetic Information Processing
c11176_g1_i1	c11176_g1_i1|m.8533	1.92	aspartyl-tRNA synthetase [EC:6.1.1.12]	Genetic Information Processing
c11179_g1_i1	c11179_g1_i1|m.8537	7.51	acyl-CoA oxidase [EC:1.3.3.6]	Metabolism
c11180_g1_i1	c11180_g1_i1|m.8538	225.26	alpha,alpha-trehalase [EC:3.2.1.28]	Metabolism
c11181_g1_i1	c11181_g1_i1|m.8539	4.09	phosphatidylinositol glycan, class Q	Metabolism
c11182_g1_i1	c11182_g1_i1|m.8540	34.66	1,2-dihydroxy-3-keto-5-methylthiopentene dioxygenase [EC:1.13.11.53 1.13.11.54]	Metabolism
c11183_g1_i1	c11183_g1_i1|m.8541	12.21	U4/U6.U5 tri-snRNP-associated protein 1	Genetic Information Processing
c11189_g1_i1	c11189_g1_i1|m.8549	2.33	ankyrin	Cellular Processes
c1119_g1_i1	c1119_g1_i1|m.330	9.98	mRNA-decapping enzyme subunit 2 [EC:3.6.1.62]	Genetic Information Processing
c11194_g1_i1	c11194_g1_i1|m.8556	16.54	small subunit ribosomal protein S12	Genetic Information Processing
c11198_g1_i1	c11198_g1_i1|m.8560	4.05	pre-mRNA-splicing factor 18	Genetic Information Processing
c11198_g1_i2	c11198_g1_i2|m.8561	18.02	pre-mRNA-splicing factor 18	Genetic Information Processing
c11199_g1_i1	c11199_g1_i1|m.8563	6.02	splicing factor, arginine/serine-rich 7	Genetic Information Processing
c11199_g1_i2	c11199_g1_i2|m.8564	6.28	splicing factor, arginine/serine-rich 7	Genetic Information Processing
c11199_g1_i3	c11199_g1_i3|m.8565	10.32	splicing factor, arginine/serine-rich 7	Genetic Information Processing
c11202_g1_i1	c11202_g1_i1|m.8569	7.94	hydroxymethylglutaryl-CoA synthase [EC:2.3.3.10]	Metabolism
c11204_g1_i1	c11204_g1_i1|m.8571	2.73	E3 ubiquitin-protein ligase SIAH1 [EC:2.3.2.27]	Genetic Information Processing
c11205_g1_i1	c11205_g1_i1|m.8572	36.75	20S proteasome subunit alpha 5 [EC:3.4.25.1]	Genetic Information Processing
c11208_g1_i1	c11208_g1_i1|m.8575	29.83	aldehyde reductase [EC:1.1.1.21]	Metabolism
c11210_g2_i1	c11210_g2_i1|m.8577	3.77	peptide-O-fucosyltransferase [EC:2.4.1.221]	Metabolism
c11211_g1_i1	c11211_g1_i1|m.8578	18.58	malonyl-CoA/methylmalonyl-CoA synthetase [EC:6.2.1.-]	Metabolism
c11213_g1_i1	c11213_g1_i1|m.8581	14.05	toll-interacting protein	Cellular Processes
c11213_g1_i2	c11213_g1_i2|m.8582	13.57	toll-interacting protein	Cellular Processes
c11218_g1_i1	c11218_g1_i1|m.8590	1.58	inhibitor of nuclear factor kappa-B kinase subunit beta [EC:2.7.11.10]	Environmental Information Processing
c11219_g1_i1	c11219_g1_i1|m.8591	10.48	transformer-2 protein	Genetic Information Processing
c11219_g1_i2	c11219_g1_i2|m.8592	7.85	transformer-2 protein	Genetic Information Processing
c11219_g1_i3	c11219_g1_i3|m.8593	9.52	transformer-2 protein	Genetic Information Processing
c11219_g1_i5	c11219_g1_i5|m.8594	10.17	transformer-2 protein	Genetic Information Processing
c11219_g1_i6	c11219_g1_i6|m.8595	6.74	transformer-2 protein	Genetic Information Processing
c11220_g1_i1	c11220_g1_i1|m.8596	3.09	ribosome assembly protein 1 [EC:3.6.5.-]	Genetic Information Processing
c11221_g1_i1	c11221_g1_i1|m.8599	3.03	CCR4-NOT transcription complex subunit 6 [EC:3.1.13.4]	Genetic Information Processing
c11221_g1_i2	c11221_g1_i2|m.8600	2.37	CCR4-NOT transcription complex subunit 6 [EC:3.1.13.4]	Genetic Information Processing
c11221_g1_i3	c11221_g1_i3|m.8601	1.85	CCR4-NOT transcription complex subunit 6 [EC:3.1.13.4]	Genetic Information Processing
c11222_g1_i1	c11222_g1_i1|m.8602	56.12	X box-binding protein 1	Genetic Information Processing
c11222_g1_i2	c11222_g1_i2|m.8604	65.16	X box-binding protein 1	Genetic Information Processing
c11223_g1_i1	c11223_g1_i1|m.8605	2.87	DNA replication licensing factor MCM6 [EC:3.6.4.12]	Genetic Information Processing
c11224_g1_i1	c11224_g1_i1|m.8607	26.64	choline/ethanolamine kinase [EC:2.7.1.32 2.7.1.82]	Metabolism
c11224_g1_i1	c11224_g1_i1|m.8608	26.64	choline/ethanolamine kinase [EC:2.7.1.32 2.7.1.82]	Metabolism
c11224_g1_i2	c11224_g1_i2|m.8609	32.32	choline/ethanolamine kinase [EC:2.7.1.32 2.7.1.82]	Metabolism
c11225_g1_i1	c11225_g1_i1|m.8610	18.63	ubiquitin-conjugating enzyme E2 J2 [EC:2.3.2.23]	Genetic Information Processing
c11227_g1_i1	c11227_g1_i1|m.8611	17.03	Ras homolog enriched in brain	Environmental Information Processing
c11233_g2_i1	c11233_g2_i1|m.8621	7.52	nuclear pore complex protein Nup54	Genetic Information Processing
c11234_g1_i1	c11234_g1_i1|m.8623	1.39	dual specificity MAP kinase phosphatase [EC:3.1.3.16 3.1.3.48]	Environmental Information Processing
c11234_g1_i2	c11234_g1_i2|m.8626	1.37	dual specificity MAP kinase phosphatase [EC:3.1.3.16 3.1.3.48]	Environmental Information Processing
c11235_g1_i1	c11235_g1_i1|m.8629	59.6	cathepsin D [EC:3.4.23.5]	Environmental Information Processing
c11247_g1_i1	c11247_g1_i1|m.8644	4.67	ESCRT-I complex subunit VPS37	Cellular Processes
c11248_g1_i1	c11248_g1_i1|m.8645	3.69	dual 3',5'-cyclic-AMP and -GMP phosphodiesterase 11 [EC:3.1.4.17 3.1.4.35]	Metabolism
c11248_g1_i2	c11248_g1_i2|m.8646	3.67	dual 3',5'-cyclic-AMP and -GMP phosphodiesterase 11 [EC:3.1.4.17 3.1.4.35]	Metabolism
c11251_g1_i1	c11251_g1_i1|m.8649	19.29	large subunit ribosomal protein L14	Genetic Information Processing
c11259_g1_i1	c11259_g1_i1|m.8661	1.59	ribonuclease P/MRP protein subunit POP5 [EC:3.1.26.5]	Genetic Information Processing
c11259_g1_i2	c11259_g1_i2|m.8662	2.37	ribonuclease P/MRP protein subunit POP5 [EC:3.1.26.5]	Genetic Information Processing
c11261_g1_i1	c11261_g1_i1|m.8668	4.47	disks large protein 1	Environmental Information Processing
c11261_g1_i2	c11261_g1_i2|m.8670	3.87	disks large protein 1	Environmental Information Processing
c11261_g1_i3	c11261_g1_i3|m.8672	4.04	disks large protein 1	Environmental Information Processing
c11261_g1_i4	c11261_g1_i4|m.8674	3.58	disks large protein 1	Environmental Information Processing
c11261_g1_i5	c11261_g1_i5|m.8675	3.46	disks large protein 1	Environmental Information Processing
c11261_g1_i6	c11261_g1_i6|m.8676	3.48	disks large protein 1	Environmental Information Processing
c11261_g1_i7	c11261_g1_i7|m.8677	3.85	disks large protein 1	Environmental Information Processing
c11262_g1_i1	c11262_g1_i1|m.8679	319.43	dihydropteridine reductase [EC:1.5.1.34]	Metabolism
c11265_g1_i1	c11265_g1_i1|m.8682	23.18	ESCRT-I complex subunit VPS37	Cellular Processes
c11276_g1_i1	c11276_g1_i1|m.8703	5.08	G protein beta subunit-like	Environmental Information Processing
c11277_g1_i1	c11277_g1_i1|m.8704	1.89	O-phospho-L-seryl-tRNASec:L-selenocysteinyl-tRNA synthase [EC:2.9.1.2]	Metabolism
c11277_g1_i2	c11277_g1_i2|m.8705	2.45	O-phospho-L-seryl-tRNASec:L-selenocysteinyl-tRNA synthase [EC:2.9.1.2]	Metabolism
c11277_g1_i3	c11277_g1_i3|m.8706	0.72	O-phospho-L-seryl-tRNASec:L-selenocysteinyl-tRNA synthase [EC:2.9.1.2]	Metabolism
c11278_g1_i1	c11278_g1_i1|m.8707	36.93	26S proteasome regulatory subunit T1	Genetic Information Processing
c11282_g1_i1	c11282_g1_i1|m.8713	7	solute carrier family 25 (peroxisomal adenine nucleotide transporter), member 17	Cellular Processes
c11282_g1_i2	c11282_g1_i2|m.8714	8.42	solute carrier family 25 (peroxisomal adenine nucleotide transporter), member 17	Cellular Processes
c11284_g1_i1	c11284_g1_i1|m.8715	27.98	arrestin-2	Cellular Processes
c11288_g1_i1	c11288_g1_i1|m.8726	5.52	phosphatidylserine decarboxylase [EC:4.1.1.65]	Metabolism
c11290_g1_i1	c11290_g1_i1|m.8729	48.48	17beta-estradiol 17-dehydrogenase / very-long-chain 3-oxoacyl-CoA reductase [EC:1.1.1.62 1.1.1.330]	Metabolism
c11293_g1_i1	c11293_g1_i1|m.8732	7.12	3-oxoacyl-[acyl-carrier-protein] synthase II [EC:2.3.1.179]	Metabolism
c11296_g1_i1	c11296_g1_i1|m.8734	14.82	dehydrogenase/reductase SDR family member 4 [EC:1.1.-.-]	Metabolism
c11304_g1_i1	c11304_g1_i1|m.8749	10.74	cystinosin	Cellular Processes
c11305_g1_i1	c11305_g1_i1|m.8750	9.14	peroxisomal 3,2-trans-enoyl-CoA isomerase [EC:5.3.3.8]	Metabolism
c11311_g1_i4	c11311_g1_i4|m.8758	9.47	poly(U)-binding-splicing factor PUF60	Genetic Information Processing
c11311_g1_i5	c11311_g1_i5|m.8759	9.69	poly(U)-binding-splicing factor PUF60	Genetic Information Processing
c11312_g1_i1	c11312_g1_i1|m.8760	14.88	phenylpyruvate tautomerase [EC:5.3.2.1]	Metabolism
c11314_g1_i1	c11314_g1_i1|m.8763	10.89	microtubule-associated protein tau	Environmental Information Processing
c11314_g1_i2	c11314_g1_i2|m.8765	7.95	microtubule-associated protein tau	Environmental Information Processing
c11315_g1_i1	c11315_g1_i1|m.8767	15.55	pre-B-cell leukemia transcription factor 1	Cellular Processes
c11316_g1_i1	c11316_g1_i1|m.8768	14.92	isocitrate dehydrogenase (NAD+) [EC:1.1.1.41]	Metabolism
c11316_g1_i2	c11316_g1_i2|m.8770	21.84	isocitrate dehydrogenase (NAD+) [EC:1.1.1.41]	Metabolism
c11326_g1_i1	c11326_g1_i1|m.8782	3.67	3-oxo-5-alpha-steroid 4-dehydrogenase 3 [EC:1.3.1.22 1.3.1.94]	Metabolism
c11327_g1_i1	c11327_g1_i1|m.8783	69.85	ubiquilin	Genetic Information Processing
c11329_g1_i1	c11329_g1_i1|m.8786	9.33	checkpoint serine/threonine-protein kinase [EC:2.7.11.1]	Cellular Processes
c11330_g1_i1	c11330_g1_i1|m.8787	164.08	cytochrome c oxidase subunit 4	Metabolism
c11333_g1_i1	c11333_g1_i1|m.8791	16.31	aubergine	Cellular Processes
c11333_g1_i3	c11333_g1_i3|m.8795	20.56	aubergine	Cellular Processes
c11339_g1_i1	c11339_g1_i1|m.8806	4.13	peroxin-10	Cellular Processes
c11339_g1_i2	c11339_g1_i2|m.8807	5.92	peroxin-10	Cellular Processes
c11340_g1_i1	c11340_g1_i1|m.8808	9.34	charged multivesicular body protein 2A	Cellular Processes
c11340_g1_i2	c11340_g1_i2|m.8809	9.51	charged multivesicular body protein 2A	Cellular Processes
c11343_g1_i1	c11343_g1_i1|m.8815	117.81	F-type H+-transporting ATPase subunit 6	Metabolism
c11349_g1_i1	c11349_g1_i1|m.8828	3.5	dTMP kinase [EC:2.7.4.9]	Metabolism
c11350_g1_i1	c11350_g1_i1|m.8829	9.91	cAMP-dependent protein kinase regulator	Cellular Processes
c11352_g1_i1	c11352_g1_i1|m.8833	6.95	aldehyde reductase [EC:1.1.1.21]	Metabolism
c11358_g1_i1	c11358_g1_i1|m.8843	2.53	CDP-diacylglycerol--glycerol-3-phosphate 3-phosphatidyltransferase [EC:2.7.8.5]	Metabolism
c11358_g1_i1	c11358_g1_i1|m.8844	2.53	CDP-diacylglycerol--glycerol-3-phosphate 3-phosphatidyltransferase [EC:2.7.8.5]	Metabolism
c11358_g1_i2	c11358_g1_i2|m.8845	2.36	CDP-diacylglycerol--glycerol-3-phosphate 3-phosphatidyltransferase [EC:2.7.8.5]	Metabolism
c11358_g1_i2	c11358_g1_i2|m.8846	2.36	CDP-diacylglycerol--glycerol-3-phosphate 3-phosphatidyltransferase [EC:2.7.8.5]	Metabolism
c11358_g1_i3	c11358_g1_i3|m.8847	2.78	CDP-diacylglycerol--glycerol-3-phosphate 3-phosphatidyltransferase [EC:2.7.8.5]	Metabolism
c11361_g1_i1	c11361_g1_i1|m.8850	79.89	transitional endoplasmic reticulum ATPase	Genetic Information Processing
c11362_g1_i1	c11362_g1_i1|m.8851	6.45	ubiquitin-protein ligase E3 A [EC:2.3.2.26]	Genetic Information Processing
c11362_g1_i1	c11362_g1_i1|m.8852	6.45	ubiquitin-protein ligase E3 A [EC:2.3.2.26]	Genetic Information Processing
c11366_g1_i1	c11366_g1_i1|m.8856	35.94	translation initiation factor eIF-2B subunit beta	Genetic Information Processing
c11368_g1_i1	c11368_g1_i1|m.8857	2.85	DNA topoisomerase III [EC:5.99.1.2]	Genetic Information Processing
c11372_g1_i1	c11372_g1_i1|m.8860	4.33	asparaginyl-tRNA synthetase [EC:6.1.1.22]	Genetic Information Processing
c11381_g1_i1	c11381_g1_i1|m.8871	3.2	protein yorkie	Environmental Information Processing
c11381_g1_i2	c11381_g1_i2|m.8872	13.56	protein yorkie	Environmental Information Processing
c11383_g1_i1	c11383_g1_i1|m.8874	6.36	polypeptide N-acetylgalactosaminyltransferase [EC:2.4.1.41]	Metabolism
c11390_g1_i1	c11390_g1_i1|m.8883	13.2	COMPASS component SWD2	Genetic Information Processing
c11396_g1_i1	c11396_g1_i1|m.8891	4.07	protein KIBRA	Environmental Information Processing
c11398_g1_i1	c11398_g1_i1|m.8897	15.16	small subunit ribosomal protein S10	Genetic Information Processing
c11402_g1_i1	c11402_g1_i1|m.8903	2.43	endonuclease III [EC:4.2.99.18]	Genetic Information Processing
c11403_g1_i1	c11403_g1_i1|m.8904	8.13	AP-3 complex subunit beta	Cellular Processes
c11403_g1_i1	c11403_g1_i1|m.8905	8.13	AP-3 complex subunit beta	Cellular Processes
c11404_g1_i1	c11404_g1_i1|m.8907	1.53	ribonucleases P/MRP protein subunit RPP25 [EC:3.1.26.5]	Genetic Information Processing
c11404_g1_i2	c11404_g1_i2|m.8909	1.65	ribonucleases P/MRP protein subunit RPP25 [EC:3.1.26.5]	Genetic Information Processing
c11404_g2_i1	c11404_g2_i1|m.8908	3.73	transcription initiation factor TFIIA large subunit	Genetic Information Processing
c11409_g1_i1	c11409_g1_i1|m.8914	23.17	translation initiation factor eIF-2B subunit alpha	Genetic Information Processing
c11411_g1_i1	c11411_g1_i1|m.8917	6.71	cyclin-dependent kinase 4 [EC:2.7.11.22]	Environmental Information Processing
c11411_g1_i2	c11411_g1_i2|m.8918	5.19	cyclin-dependent kinase 4 [EC:2.7.11.22]	Environmental Information Processing
c11416_g1_i1	c11416_g1_i1|m.8924	13.91	DnaJ homolog subfamily C member 1	Genetic Information Processing
c11422_g1_i1	c11422_g1_i1|m.8932	18.81	guanine nucleotide-binding protein G(s) subunit alpha	Environmental Information Processing
c11426_g1_i1	c11426_g1_i1|m.8936	1.56	alpha-1,6-mannosyl-glycoprotein beta-1,2-N-acetylglucosaminyltransferase [EC:2.4.1.143]	Metabolism
c11426_g1_i2	c11426_g1_i2|m.8937	1.29	alpha-1,6-mannosyl-glycoprotein beta-1,2-N-acetylglucosaminyltransferase [EC:2.4.1.143]	Metabolism
c11428_g1_i1	c11428_g1_i1|m.8939	47.19	serine/threonine-protein kinase SIK2 [EC:2.7.11.1]	Cellular Processes
c11434_g1_i1	c11434_g1_i1|m.8949	4.83	crooked neck	Genetic Information Processing
c11436_g1_i1	c11436_g1_i1|m.8951	3.27	syntaxin 16	Genetic Information Processing
c11445_g1_i1	c11445_g1_i1|m.8965	6.47	exocyst complex component 7	Cellular Processes
c11446_g1_i1	c11446_g1_i1|m.8966	5.18	heparosan-N-sulfate-glucuronate 5-epimerase [EC:5.1.3.17]	Metabolism
c11448_g1_i1	c11448_g1_i1|m.8969	3.1	ATP-binding cassette, subfamily A (ABC1), member 5	Environmental Information Processing
c11448_g2_i1	c11448_g2_i1|m.8970	2.04	ATP-binding cassette, subfamily A (ABC1), member 5	Environmental Information Processing
c11450_g1_i1	c11450_g1_i1|m.8977	117.56	juvenile hormone epoxide hydrolase	Metabolism
c11455_g1_i1	c11455_g1_i1|m.8985	42.45	alpha-soluble NSF attachment protein	Cellular Processes
c11460_g1_i1	c11460_g1_i1|m.8992	0.94	serine/threonine-protein phosphatase 2A regulatory subunit B''	Genetic Information Processing
c11460_g1_i2	c11460_g1_i2|m.8994	0.8	serine/threonine-protein phosphatase 2A regulatory subunit B''	Genetic Information Processing
c11460_g1_i3	c11460_g1_i3|m.8995	1.1	serine/threonine-protein phosphatase 2A regulatory subunit B''	Genetic Information Processing
c11461_g1_i1	c11461_g1_i1|m.8996	2.13	myosin heavy chain	Cellular Processes
c11465_g1_i1	c11465_g1_i1|m.9002	1.49	LIM domain-containing protein	Environmental Information Processing
c11465_g1_i2	c11465_g1_i2|m.9006	1.13	LIM domain-containing protein	Environmental Information Processing
c11465_g1_i3	c11465_g1_i3|m.9010	0.61	LIM domain-containing protein	Environmental Information Processing
c11465_g1_i4	c11465_g1_i4|m.9013	1.28	LIM domain-containing protein	Environmental Information Processing
c11470_g1_i1	c11470_g1_i1|m.9025	12.43	cystinosin	Cellular Processes
c11470_g1_i2	c11470_g1_i2|m.9026	12.23	cystinosin	Cellular Processes
c11471_g1_i1	c11471_g1_i1|m.9027	47.47	20S proteasome subunit beta 5 [EC:3.4.25.1]	Genetic Information Processing
c11472_g1_i1	c11472_g1_i1|m.9028	235.7	protein disulfide isomerase family A, member 3 [EC:5.3.4.1]	Genetic Information Processing
c11473_g1_i1	c11473_g1_i1|m.9029	1.27	phosphatidylinositol glycan, class A [EC:2.4.1.198]	Metabolism
c11473_g1_i2	c11473_g1_i2|m.9030	1.26	phosphatidylinositol glycan, class A [EC:2.4.1.198]	Metabolism
c11475_g1_i1	c11475_g1_i1|m.9032	54.24	choline-phosphate cytidylyltransferase [EC:2.7.7.15]	Metabolism
c11475_g1_i2	c11475_g1_i2|m.9038	48.27	choline-phosphate cytidylyltransferase [EC:2.7.7.15]	Metabolism
c11475_g2_i1	c11475_g2_i1|m.9033	5.91	choline-phosphate cytidylyltransferase [EC:2.7.7.15]	Metabolism
c11475_g2_i2	c11475_g2_i2|m.9035	7.07	choline-phosphate cytidylyltransferase [EC:2.7.7.15]	Metabolism
c11475_g2_i3	c11475_g2_i3|m.9037	7.22	choline-phosphate cytidylyltransferase [EC:2.7.7.15]	Metabolism
c11476_g1_i1	c11476_g1_i1|m.9040	13.07	mannosyl-oligosaccharide alpha-1,2-mannosidase [EC:3.2.1.113]	Metabolism
c11476_g1_i2	c11476_g1_i2|m.9041	15.92	mannosyl-oligosaccharide alpha-1,2-mannosidase [EC:3.2.1.113]	Metabolism
c11478_g1_i1	c11478_g1_i1|m.9044	1.1	isoleucyl-tRNA synthetase [EC:6.1.1.5]	Genetic Information Processing
c11478_g2_i1	c11478_g2_i1|m.9045	2.52	isoleucyl-tRNA synthetase [EC:6.1.1.5]	Genetic Information Processing
c11481_g1_i1	c11481_g1_i1|m.9049	6.72	polypeptide N-acetylgalactosaminyltransferase [EC:2.4.1.41]	Metabolism
c11481_g1_i2	c11481_g1_i2|m.9050	13.93	polypeptide N-acetylgalactosaminyltransferase [EC:2.4.1.41]	Metabolism
c11484_g1_i1	c11484_g1_i1|m.9054	2.89	cell division control protein 45	Cellular Processes
c11487_g1_i2	c11487_g1_i2|m.9059	4.28	membrane-bound transcription factor site-1 protease [EC:3.4.21.112]	Genetic Information Processing
c11488_g1_i1	c11488_g1_i1|m.9060	4.63	dolichyl-phosphate-mannose-protein mannosyltransferase [EC:2.4.1.109]	Metabolism
c11488_g1_i1	c11488_g1_i1|m.9061	4.63	dolichyl-phosphate-mannose-protein mannosyltransferase [EC:2.4.1.109]	Metabolism
c11488_g1_i2	c11488_g1_i2|m.9063	5.11	dolichyl-phosphate-mannose-protein mannosyltransferase [EC:2.4.1.109]	Metabolism
c11490_g1_i1	c11490_g1_i1|m.9065	8.84	splicing factor 45	Genetic Information Processing
c11491_g1_i1	c11491_g1_i1|m.9067	28.08	UMP-CMP kinase [EC:2.7.4.- 2.7.4.14]	Metabolism
c11492_g1_i1	c11492_g1_i1|m.9068	4.58	protein AIR1/2	Genetic Information Processing
c11493_g1_i1	c11493_g1_i1|m.9069	30.69	small subunit ribosomal protein S7	Genetic Information Processing
c11497_g1_i2	c11497_g1_i2|m.9074	3.07	TGF-beta receptor type-1 [EC:2.7.11.30]	Environmental Information Processing
c11497_g1_i3	c11497_g1_i3|m.9075	2.72	TGF-beta receptor type-1 [EC:2.7.11.30]	Environmental Information Processing
c11498_g1_i1	c11498_g1_i1|m.9076	1.39	carbonyl reductase 1 [EC:1.1.1.184 1.1.1.189 1.1.1.197]	Metabolism
c11498_g2_i2	c11498_g2_i2|m.9078	3.88	carbonyl reductase 1 [EC:1.1.1.184 1.1.1.189 1.1.1.197]	Metabolism
c11499_g1_i1	c11499_g1_i1|m.9079	76.89	superoxide dismutase, Cu-Zn family [EC:1.15.1.1]	Cellular Processes
c11499_g1_i2	c11499_g1_i2|m.9080	95.96	superoxide dismutase, Cu-Zn family [EC:1.15.1.1]	Cellular Processes
c11505_g1_i1	c11505_g1_i1|m.9087	1.61	proto-oncogene tyrosine-protein kinase ROS [EC:2.7.10.1]	Environmental Information Processing
c11505_g2_i1	c11505_g2_i1|m.9088	1.31	proto-oncogene tyrosine-protein kinase ROS [EC:2.7.10.1]	Environmental Information Processing
c11505_g2_i2	c11505_g2_i2|m.9090	1.09	proto-oncogene tyrosine-protein kinase ROS [EC:2.7.10.1]	Environmental Information Processing
c11508_g1_i1	c11508_g1_i1|m.9097	2.68	thymidine kinase [EC:2.7.1.21]	Metabolism
c11508_g1_i2	c11508_g1_i2|m.9099	2.56	thymidine kinase [EC:2.7.1.21]	Metabolism
c11508_g1_i3	c11508_g1_i3|m.9100	2.86	thymidine kinase [EC:2.7.1.21]	Metabolism
c11508_g2_i1	c11508_g2_i1|m.9098	5.09	platelet-activating factor acetylhydrolase [EC:3.1.1.47]	Metabolism
c11510_g1_i1	c11510_g1_i1|m.9102	18.66	methionyl-tRNA synthetase [EC:6.1.1.10]	Metabolism
c11514_g1_i1	c11514_g1_i1|m.9111	17.88	peptidyl-prolyl cis-trans isomerase NIMA-interacting 1 [EC:5.2.1.8]	Cellular Processes
c11516_g1_i1	c11516_g1_i1|m.9114	4.3	elongation factor 1-alpha	Genetic Information Processing
c11516_g1_i2	c11516_g1_i2|m.9115	4.73	elongation factor 1-alpha	Genetic Information Processing
c11521_g1_i1	c11521_g1_i1|m.9123	3.2	replication factor C subunit 2/4	Genetic Information Processing
c11524_g1_i1	c11524_g1_i1|m.9130	137.38	lectin, mannose-binding 1	Genetic Information Processing
c11527_g1_i1	c11527_g1_i1|m.9133	1.94	alpha-1,3-glucosyltransferase [EC:2.4.1.265]	Metabolism
c11527_g1_i2	c11527_g1_i2|m.9134	2.15	alpha-1,3-glucosyltransferase [EC:2.4.1.265]	Metabolism
c11528_g1_i1	c11528_g1_i1|m.9135	1.84	LIM domain-binding protein 1	Cellular Processes
c11528_g1_i2	c11528_g1_i2|m.9136	1.52	LIM domain-binding protein 1	Cellular Processes
c11534_g1_i1	c11534_g1_i1|m.9149	16.52	ferrochelatase [EC:4.99.1.1]	Metabolism
c11538_g1_i1	c11538_g1_i1|m.9158	2.66	glutathione S-transferase [EC:2.5.1.18]	Metabolism
c11538_g1_i2	c11538_g1_i2|m.9159	3.87	glutathione S-transferase [EC:2.5.1.18]	Metabolism
c11543_g1_i1	c11543_g1_i1|m.9165	12.28	porphobilinogen synthase [EC:4.2.1.24]	Metabolism
c11543_g1_i1	c11543_g1_i1|m.9166	12.28	solute carrier family 31 (copper transporter), member 1	Cellular Processes
c11543_g1_i2	c11543_g1_i2|m.9167	7.04	porphobilinogen synthase [EC:4.2.1.24]	Metabolism
c11545_g1_i1	c11545_g1_i1|m.9170	10.45	ATP-dependent metalloprotease [EC:3.4.24.-]	Cellular Processes
c11545_g1_i2	c11545_g1_i2|m.9171	10.08	ATP-dependent metalloprotease [EC:3.4.24.-]	Cellular Processes
c11548_g1_i1	c11548_g1_i1|m.9175	71.44	cathepsin D [EC:3.4.23.5]	Environmental Information Processing
c11555_g1_i2	c11555_g1_i2|m.9189	1.2	calmodulin	Environmental Information Processing
c11559_g2_i1	c11559_g2_i1|m.9195	6.76	lactase-phlorizin hydrolase [EC:3.2.1.108 3.2.1.62]	Metabolism
c1156_g1_i1	c1156_g1_i1|m.344	0.71	chondroitin sulfate N-acetylgalactosaminyltransferase 1/2 [EC:2.4.1.174 2.4.1.175]	Metabolism
c1156_g2_i1	c1156_g2_i1|m.345	0.69	chondroitin sulfate N-acetylgalactosaminyltransferase 1/2 [EC:2.4.1.174 2.4.1.175]	Metabolism
c11562_g1_i1	c11562_g1_i1|m.9202	7.47	regulator of nonsense transcripts 3	Genetic Information Processing
c11568_g1_i1	c11568_g1_i1|m.9214	89.93	protein transport protein SEC23	Genetic Information Processing
c11575_g1_i1	c11575_g1_i1|m.9222	34.37	regulator of nonsense transcripts 1 [EC:3.6.4.-]	Genetic Information Processing
c11576_g1_i1	c11576_g1_i1|m.9223	3.97	soluble calcium-activated nucleotidase 1 [EC:3.6.1.6]	Metabolism
c11576_g1_i2	c11576_g1_i2|m.9224	3.6	soluble calcium-activated nucleotidase 1 [EC:3.6.1.6]	Metabolism
c11576_g1_i3	c11576_g1_i3|m.9225	10.58	soluble calcium-activated nucleotidase 1 [EC:3.6.1.6]	Metabolism
c11577_g1_i1	c11577_g1_i1|m.9226	4.53	cytohesin	Environmental Information Processing
c11577_g1_i2	c11577_g1_i2|m.9228	4.35	cytohesin	Environmental Information Processing
c11585_g1_i2	c11585_g1_i2|m.9249	2.73	ankyrin repeat-rich membrane spanning protein	Cellular Processes
c11585_g1_i7	c11585_g1_i7|m.9256	3.26	ankyrin repeat-rich membrane spanning protein	Cellular Processes
c11586_g1_i1	c11586_g1_i1|m.9258	2.6	phosphatidylinositol-4,5-bisphosphate 3-kinase [EC:2.7.1.153]	Metabolism
c11591_g1_i1	c11591_g1_i1|m.9264	3.83	F-box and WD-40 domain protein 1/11	Genetic Information Processing
c11591_g1_i2	c11591_g1_i2|m.9265	4.09	F-box and WD-40 domain protein 1/11	Genetic Information Processing
c11592_g1_i1	c11592_g1_i1|m.9266	17.73	AP-1 complex subunit mu	Cellular Processes
c11594_g1_i1	c11594_g1_i1|m.9271	6.47	guanosine-3',5'-bis(diphosphate) 3'-pyrophosphohydrolase [EC:3.1.7.2]	Metabolism
c11595_g1_i1	c11595_g1_i1|m.9272	74.93	sepiapterin reductase [EC:1.1.1.153]	Metabolism
c11598_g1_i1	c11598_g1_i1|m.9276	13.71	proline-rich protein PRCC	Cellular Processes
c11599_g1_i1	c11599_g1_i1|m.9277	10.02	6-phosphofructokinase 1 [EC:2.7.1.11]	Metabolism
c11599_g1_i1	c11599_g1_i1|m.9278	10.02	6-phosphofructokinase 1 [EC:2.7.1.11]	Metabolism
c11599_g1_i2	c11599_g1_i2|m.9280	13.81	6-phosphofructokinase 1 [EC:2.7.1.11]	Metabolism
c11599_g1_i3	c11599_g1_i3|m.9282	4.39	6-phosphofructokinase 1 [EC:2.7.1.11]	Metabolism
c11600_g1_i1	c11600_g1_i1|m.9284	32.41	heterogeneous nuclear ribonucleoprotein A1/A3	Genetic Information Processing
c11601_g1_i1	c11601_g1_i1|m.9286	71.04	3-hydroxyacyl-CoA dehydrogenase / 3a,7a,12a-trihydroxy-5b-cholest-24-enoyl-CoA hydratase / enoyl-CoA hydratase 2 [EC:1.1.1.35 4.2.1.107 4.2.1.119]	Metabolism
c11601_g1_i2	c11601_g1_i2|m.9287	37.8	3-hydroxyacyl-CoA dehydrogenase / 3a,7a,12a-trihydroxy-5b-cholest-24-enoyl-CoA hydratase / enoyl-CoA hydratase 2 [EC:1.1.1.35 4.2.1.107 4.2.1.119]	Metabolism
c11603_g1_i1	c11603_g1_i1|m.9290	5.96	serine/threonine-protein kinase ULK/ATG1 [EC:2.7.11.1]	Environmental Information Processing
c11603_g1_i1	c11603_g1_i1|m.9291	5.96	serine/threonine-protein kinase ULK/ATG1 [EC:2.7.11.1]	Environmental Information Processing
c11603_g1_i2	c11603_g1_i2|m.9292	3.73	serine/threonine-protein kinase ULK/ATG1 [EC:2.7.11.1]	Environmental Information Processing
c11605_g1_i1	c11605_g1_i1|m.9295	6.59	glutathione S-transferase [EC:2.5.1.18]	Metabolism
c11605_g1_i4	c11605_g1_i4|m.9297	6.37	glutathione S-transferase [EC:2.5.1.18]	Metabolism
c11612_g1_i1	c11612_g1_i1|m.9311	13.05	ESCRT-I complex subunit VPS28	Cellular Processes
c11616_g1_i1	c11616_g1_i1|m.9317	1.5	valyl-tRNA synthetase [EC:6.1.1.9]	Genetic Information Processing
c11618_g1_i1	c11618_g1_i1|m.9323	8.47	syntaxin 8	Genetic Information Processing
c11623_g1_i1	c11623_g1_i1|m.9340	3.23	DNA ligase 3 [EC:6.5.1.1]	Genetic Information Processing
c11624_g1_i1	c11624_g1_i1|m.9341	28.15	polypeptide N-acetylgalactosaminyltransferase [EC:2.4.1.41]	Metabolism
c11627_g1_i1	c11627_g1_i1|m.9348	137.77	ubiquinol-cytochrome c reductase core subunit 2	Metabolism
c11628_g1_i1	c11628_g1_i1|m.9350	40.61	FK506-binding protein 4/5 [EC:5.2.1.8]	Cellular Processes
c11628_g1_i2	c11628_g1_i2|m.9351	43.25	FK506-binding protein 4/5 [EC:5.2.1.8]	Cellular Processes
c11632_g1_i1	c11632_g1_i1|m.9355	44.15	syntaxin 5	Genetic Information Processing
c11633_g1_i1	c11633_g1_i1|m.9356	40.33	programmed cell death protein 4	Cellular Processes
c11635_g1_i1	c11635_g1_i1|m.9359	48.8	26S proteasome regulatory subunit T6	Genetic Information Processing
c11636_g1_i1	c11636_g1_i1|m.9360	321.62	staphylococcal nuclease domain-containing protein 1	Cellular Processes
c11641_g1_i1	c11641_g1_i1|m.9369	57.27	arginyl-tRNA synthetase [EC:6.1.1.19]	Genetic Information Processing
c11641_g1_i1	c11641_g1_i1|m.9370	57.27	arginyl-tRNA synthetase [EC:6.1.1.19]	Genetic Information Processing
c11644_g1_i1	c11644_g1_i1|m.9377	7.45	myo-inositol-1(or 4)-monophosphatase [EC:3.1.3.25]	Metabolism
c11646_g1_i1	c11646_g1_i1|m.9379	270.02	stearoyl-CoA desaturase (delta-9 desaturase) [EC:1.14.19.1]	Metabolism
c11648_g1_i1	c11648_g1_i1|m.9386	4.66	glyceraldehyde 3-phosphate dehydrogenase [EC:1.2.1.12]	Metabolism
c11648_g1_i2	c11648_g1_i2|m.9387	11.29	glyceraldehyde 3-phosphate dehydrogenase [EC:1.2.1.12]	Metabolism
c11649_g1_i1	c11649_g1_i1|m.9388	72.11	DNA-directed RNA polymerase III subunit RPC2 [EC:2.7.7.6]	Metabolism
c11650_g1_i1	c11650_g1_i1|m.9389	2.8	15-hydroxyprostaglandin dehydrogenase (NAD) [EC:1.1.1.141]	Cellular Processes
c11650_g1_i1	c11650_g1_i1|m.9390	2.8	15-hydroxyprostaglandin dehydrogenase (NAD) [EC:1.1.1.141]	Cellular Processes
c11650_g1_i2	c11650_g1_i2|m.9391	5.49	15-hydroxyprostaglandin dehydrogenase (NAD) [EC:1.1.1.141]	Cellular Processes
c11653_g1_i1	c11653_g1_i1|m.9393	11.57	lipoic acid synthetase [EC:2.8.1.8]	Metabolism
c11653_g1_i2	c11653_g1_i2|m.9394	15.88	lipoic acid synthetase [EC:2.8.1.8]	Metabolism
c11655_g1_i1	c11655_g1_i1|m.9399	2.19	voltage-dependent calcium channel alpha-2/delta, invertebrate	Environmental Information Processing
c11661_g1_i1	c11661_g1_i1|m.9409	40.16	adenylosuccinate lyase [EC:4.3.2.2]	Metabolism
c11666_g1_i1	c11666_g1_i1|m.9416	7.71	ribosomal protein S6 kinase alpha-5 [EC:2.7.11.1]	Environmental Information Processing
c11669_g1_i1	c11669_g1_i1|m.9420	1.69	aspartyl-tRNA synthetase [EC:6.1.1.12]	Genetic Information Processing
c11675_g1_i1	c11675_g1_i1|m.9438	310.32	aldehyde dehydrogenase family 7 member A1 [EC:1.2.1.31 1.2.1.8 1.2.1.3]	Metabolism
c11675_g2_i1	c11675_g2_i1|m.9440	178.56	aldehyde dehydrogenase family 7 member A1 [EC:1.2.1.31 1.2.1.8 1.2.1.3]	Metabolism
c11677_g1_i1	c11677_g1_i1|m.9442	8.78	DNA-directed RNA polymerase III subunit RPC6	Metabolism
c11681_g1_i1	c11681_g1_i1|m.9447	9.63	eukaryotic translation initiation factor 2-alpha kinase 1 [EC:2.7.11.1]	Genetic Information Processing
c11684_g1_i1	c11684_g1_i1|m.9452	8.08	lysophosphatidic acid acyltransferase / lysophosphatidylinositol acyltransferase [EC:2.3.1.51 2.3.1.-]	Metabolism
c11684_g1_i2	c11684_g1_i2|m.9453	8.47	lysophosphatidic acid acyltransferase / lysophosphatidylinositol acyltransferase [EC:2.3.1.51 2.3.1.-]	Metabolism
c11684_g1_i3	c11684_g1_i3|m.9454	7.89	lysophosphatidic acid acyltransferase / lysophosphatidylinositol acyltransferase [EC:2.3.1.51 2.3.1.-]	Metabolism
c11684_g1_i4	c11684_g1_i4|m.9455	8.04	lysophosphatidic acid acyltransferase / lysophosphatidylinositol acyltransferase [EC:2.3.1.51 2.3.1.-]	Metabolism
c11690_g1_i2	c11690_g1_i2|m.9472	6.66	transcription initiation factor TFIID subunit 11	Genetic Information Processing
c11705_g1_i1	c11705_g1_i1|m.9496	13.52	splicing factor, arginine/serine-rich 1/9	Genetic Information Processing
c11705_g1_i2	c11705_g1_i2|m.9497	13.76	splicing factor, arginine/serine-rich 1/9	Genetic Information Processing
c11709_g1_i1	c11709_g1_i1|m.9501	56.77	cystinosin	Cellular Processes
c11714_g1_i1	c11714_g1_i1|m.9507	126.7	transketolase [EC:2.2.1.1]	Metabolism
c11714_g1_i2	c11714_g1_i2|m.9508	118.27	transketolase [EC:2.2.1.1]	Metabolism
c11717_g1_i1	c11717_g1_i1|m.9510	70.97	protein transport protein SEC13	Genetic Information Processing
c11718_g1_i1	c11718_g1_i1|m.9511	6.91	tumor protein p53-inducible nuclear protein 1	Cellular Processes
c11718_g1_i2	c11718_g1_i2|m.9512	8.63	tumor protein p53-inducible nuclear protein 1	Cellular Processes
c11724_g1_i1	c11724_g1_i1|m.9521	24.14	cytochrome-b5 reductase [EC:1.6.2.2]	Metabolism
c11724_g1_i2	c11724_g1_i2|m.9522	29.65	cytochrome-b5 reductase [EC:1.6.2.2]	Metabolism
c11729_g1_i1	c11729_g1_i1|m.9527	53.89	serpin B	Cellular Processes
c11730_g1_i1	c11730_g1_i1|m.9528	16.01	dynactin 2	Cellular Processes
c11731_g1_i1	c11731_g1_i1|m.9529	19.93	peroxin-11B	Cellular Processes
c11732_g1_i1	c11732_g1_i1|m.9530	7.66	phosphatidylinositol 3-kinase [EC:2.7.1.137]	Metabolism
c11737_g1_i1	c11737_g1_i1|m.9538	14.57	dihydroorotate dehydrogenase [EC:1.3.5.2]	Metabolism
c11740_g1_i1	c11740_g1_i1|m.9547	24.83	cystathionine beta-synthase [EC:4.2.1.22]	Metabolism
c11741_g1_i1	c11741_g1_i1|m.9548	14.57	ribosome-binding protein 1	Genetic Information Processing
c11741_g1_i2	c11741_g1_i2|m.9549	12.6	ribosome-binding protein 1	Genetic Information Processing
c11746_g1_i1	c11746_g1_i1|m.9555	10.01	vesicle-associated membrane protein 7	Genetic Information Processing
c11748_g1_i1	c11748_g1_i1|m.9559	114.59	translation initiation factor 3 subunit G	Genetic Information Processing
c11749_g1_i1	c11749_g1_i1|m.9561	36.99	NADH dehydrogenase (ubiquinone) flavoprotein 2 [EC:1.6.5.3 1.6.99.3]	Metabolism
c11750_g1_i1	c11750_g1_i1|m.9562	18.3	cAMP-dependent protein kinase regulator	Cellular Processes
c11750_g1_i2	c11750_g1_i2|m.9563	21.57	cAMP-dependent protein kinase regulator	Cellular Processes
c11752_g1_i1	c11752_g1_i1|m.9568	3.02	decaprenyl-diphosphate synthase subunit 2 [EC:2.5.1.91]	Metabolism
c11752_g1_i2	c11752_g1_i2|m.9569	2.55	decaprenyl-diphosphate synthase subunit 2 [EC:2.5.1.91]	Metabolism
c11752_g1_i4	c11752_g1_i4|m.9570	2.2	decaprenyl-diphosphate synthase subunit 2 [EC:2.5.1.91]	Metabolism
c11752_g1_i7	c11752_g1_i7|m.9571	2.68	decaprenyl-diphosphate synthase subunit 2 [EC:2.5.1.91]	Metabolism
c11753_g1_i1	c11753_g1_i1|m.9572	70.47	V-type H+-transporting ATPase subunit C	Metabolism
c11760_g1_i1	c11760_g1_i1|m.9583	1.76	receptor-type tyrosine-protein phosphatase N [EC:3.1.3.48]	Cellular Processes
c11760_g1_i2	c11760_g1_i2|m.9584	1.62	receptor-type tyrosine-protein phosphatase N [EC:3.1.3.48]	Cellular Processes
c11760_g1_i3	c11760_g1_i3|m.9585	1.45	receptor-type tyrosine-protein phosphatase N [EC:3.1.3.48]	Cellular Processes
c11761_g1_i1	c11761_g1_i1|m.9586	34.35	Derlin-2/3	Genetic Information Processing
c11765_g1_i1	c11765_g1_i1|m.9592	399.73	tubulin beta	Cellular Processes
c11765_g2_i1	c11765_g2_i1|m.9593	528.75	tubulin beta	Cellular Processes
c11771_g1_i1	c11771_g1_i1|m.9610	2.97	RAP1 GTPase activating protein 1	Environmental Information Processing
c11771_g1_i2	c11771_g1_i2|m.9611	2.99	RAP1 GTPase activating protein 1	Environmental Information Processing
c11774_g1_i1	c11774_g1_i1|m.9614	7	PAB-dependent poly(A)-specific ribonuclease subunit 3	Genetic Information Processing
c11774_g1_i2	c11774_g1_i2|m.9616	8	PAB-dependent poly(A)-specific ribonuclease subunit 3	Genetic Information Processing
c11774_g1_i3	c11774_g1_i3|m.9617	5.83	PAB-dependent poly(A)-specific ribonuclease subunit 3	Genetic Information Processing
c11774_g1_i4	c11774_g1_i4|m.9618	6.32	PAB-dependent poly(A)-specific ribonuclease subunit 3	Genetic Information Processing
c11774_g1_i4	c11774_g1_i4|m.9619	6.32	PAB-dependent poly(A)-specific ribonuclease subunit 3	Genetic Information Processing
c11779_g1_i1	c11779_g1_i1|m.9629	1.69	UDP-glucose 4-epimerase [EC:5.1.3.2]	Metabolism
c11779_g1_i2	c11779_g1_i2|m.9631	1.62	UDP-glucose 4-epimerase [EC:5.1.3.2]	Metabolism
c11781_g1_i1	c11781_g1_i1|m.9634	3.93	pantetheine hydrolase [EC:3.5.1.92]	Metabolism
c11787_g1_i1	c11787_g1_i1|m.9645	341.43	serpin B	Cellular Processes
c11788_g1_i1	c11788_g1_i1|m.9647	11.79	E3 ubiquitin-protein ligase MARCH6 [EC:2.3.2.27]	Genetic Information Processing
c11796_g1_i1	c11796_g1_i1|m.9659	32.27	E3 ubiquitin-protein ligase SIAH1 [EC:2.3.2.27]	Genetic Information Processing
c11800_g1_i1	c11800_g1_i1|m.9664	1.94	low-density lipoprotein receptor-related protein 1 (alpha-2-macroglobulin receptor)	Cellular Processes
c11802_g2_i1	c11802_g2_i1|m.9677	25.99	large subunit ribosomal protein L18	Genetic Information Processing
c11803_g1_i1	c11803_g1_i1|m.9678	17.72	mannose-1-phosphate guanylyltransferase [EC:2.7.7.13]	Metabolism
c11804_g1_i1	c11804_g1_i1|m.9679	10.26	mRNA (guanine-N7-)-methyltransferase [EC:2.1.1.56]	Genetic Information Processing
c11806_g1_i1	c11806_g1_i1|m.9681	41.06	succinyl-CoA synthetase beta subunit [EC:6.2.1.4 6.2.1.5]	Metabolism
c11807_g1_i1	c11807_g1_i1|m.9683	12.84	Ran GTPase-activating protein 1	Genetic Information Processing
c11809_g1_i1	c11809_g1_i1|m.9685	10.88	septin 6/8/11	Cellular Processes
c11814_g1_i1	c11814_g1_i1|m.9692	33.69	20S proteasome subunit beta 4 [EC:3.4.25.1]	Genetic Information Processing
c11818_g1_i1	c11818_g1_i1|m.9698	1.38	transcription initiation factor TFIID subunit 4	Genetic Information Processing
c11818_g1_i2	c11818_g1_i2|m.9699	2.15	transcription initiation factor TFIID subunit 4	Genetic Information Processing
c11818_g1_i4	c11818_g1_i4|m.9700	1.63	transcription initiation factor TFIID subunit 4	Genetic Information Processing
c11821_g1_i1	c11821_g1_i1|m.9703	10.52	m7GpppX diphosphatase [EC:3.6.1.59]	Genetic Information Processing
c11822_g1_i1	c11822_g1_i1|m.9704	3.38	ankyrin	Cellular Processes
c11822_g1_i2	c11822_g1_i2|m.9705	3.08	ankyrin	Cellular Processes
c11824_g1_i1	c11824_g1_i1|m.9707	3.26	DNA repair protein REV1 [EC:2.7.7.-]	Genetic Information Processing
c11825_g1_i1	c11825_g1_i1|m.9708	4.81	acetyl-CoA acyltransferase 2 [EC:2.3.1.16]	Metabolism
c11825_g2_i1	c11825_g2_i1|m.9709	8.94	acetyl-CoA acyltransferase 2 [EC:2.3.1.16]	Metabolism
c11827_g1_i1	c11827_g1_i1|m.9712	18.3	glucuronosyltransferase [EC:2.4.1.17]	Metabolism
c11840_g1_i1	c11840_g1_i1|m.9726	4.96	uridine kinase [EC:2.7.1.48]	Metabolism
c11840_g1_i2	c11840_g1_i2|m.9727	4.87	uridine kinase [EC:2.7.1.48]	Metabolism
c11840_g1_i3	c11840_g1_i3|m.9728	6.07	uridine kinase [EC:2.7.1.48]	Metabolism
c11842_g1_i1	c11842_g1_i1|m.9730	9.88	mitogen-activated protein kinase kinase 4 [EC:2.7.12.2]	Environmental Information Processing
c11842_g1_i2	c11842_g1_i2|m.9731	9.05	mitogen-activated protein kinase kinase 4 [EC:2.7.12.2]	Environmental Information Processing
c11843_g1_i1	c11843_g1_i1|m.9732	35.53	sorting nexin-5/6/32	Cellular Processes
c11844_g1_i1	c11844_g1_i1|m.9733	39.47	20S proteasome subunit alpha 6 [EC:3.4.25.1]	Genetic Information Processing
c11845_g1_i1	c11845_g1_i1|m.9734	1.94	serum response factor	Environmental Information Processing
c11845_g1_i2	c11845_g1_i2|m.9735	3.5	serum response factor	Environmental Information Processing
c11845_g1_i3	c11845_g1_i3|m.9736	3.39	serum response factor	Environmental Information Processing
c11849_g1_i1	c11849_g1_i1|m.9741	5.96	pre-mRNA-processing factor 17	Genetic Information Processing
c11850_g1_i1	c11850_g1_i1|m.9742	3.01	homer	Environmental Information Processing
c11852_g1_i1	c11852_g1_i1|m.9744	14.95	endoplasmic reticulum lectin 1	Genetic Information Processing
c11855_g1_i1	c11855_g1_i1|m.9748	46.54	translation initiation factor 5B	Genetic Information Processing
c11856_g1_i1	c11856_g1_i1|m.9750	18.51	peroxin-14	Cellular Processes
c11859_g1_i1	c11859_g1_i1|m.9755	7.96	c-ets proto-oncogene protein	Environmental Information Processing
c11859_g1_i2	c11859_g1_i2|m.9756	6.12	c-ets proto-oncogene protein	Environmental Information Processing
c11859_g1_i3	c11859_g1_i3|m.9758	6.18	c-ets proto-oncogene protein	Environmental Information Processing
c11859_g1_i4	c11859_g1_i4|m.9760	6.05	c-ets proto-oncogene protein	Environmental Information Processing
c11861_g1_i1	c11861_g1_i1|m.9764	53.79	1,4-alpha-glucan branching enzyme [EC:2.4.1.18]	Metabolism
c11863_g1_i1	c11863_g1_i1|m.9771	44.67	serpin B	Cellular Processes
c11867_g2_i1	c11867_g2_i1|m.9776	7.62	cAMP-specific phosphodiesterase 4 [EC:3.1.4.53]	Metabolism
c11867_g2_i2	c11867_g2_i2|m.9777	11.65	cAMP-specific phosphodiesterase 4 [EC:3.1.4.53]	Metabolism
c11867_g2_i3	c11867_g2_i3|m.9778	9.1	cAMP-specific phosphodiesterase 4 [EC:3.1.4.53]	Metabolism
c11868_g1_i1	c11868_g1_i1|m.9780	0.77	vacuole morphology and inheritance protein 14	Cellular Processes
c11868_g1_i2	c11868_g1_i2|m.9782	0.87	vacuole morphology and inheritance protein 14	Cellular Processes
c11868_g1_i3	c11868_g1_i3|m.9785	0.85	vacuole morphology and inheritance protein 14	Cellular Processes
c11868_g1_i3	c11868_g1_i3|m.9786	0.85	vacuole morphology and inheritance protein 14	Cellular Processes
c11868_g1_i4	c11868_g1_i4|m.9788	0.76	vacuole morphology and inheritance protein 14	Cellular Processes
c11868_g1_i5	c11868_g1_i5|m.9790	0.96	vacuole morphology and inheritance protein 14	Cellular Processes
c11875_g1_i1	c11875_g1_i1|m.9800	17.84	very-long-chain (3R)-3-hydroxyacyl-CoA dehydratase [EC:4.2.1.134]	Metabolism
c11880_g1_i1	c11880_g1_i1|m.9806	33.61	aminopeptidase N [EC:3.4.11.2]	Metabolism
c11881_g1_i1	c11881_g1_i1|m.9807	5.66	serpin B	Cellular Processes
c11881_g2_i1	c11881_g2_i1|m.9808	3.65	serpin B	Cellular Processes
c11881_g2_i2	c11881_g2_i2|m.9809	2.48	serpin B	Cellular Processes
c11883_g1_i1	c11883_g1_i1|m.9811	61.92	oligosaccharyltransferase complex subunit gamma	Metabolism
c11886_g1_i1	c11886_g1_i1|m.9813	2.4	costal 2	Environmental Information Processing
c11891_g1_i1	c11891_g1_i1|m.9822	13.46	dUTP pyrophosphatase [EC:3.6.1.23]	Metabolism
c11892_g1_i1	c11892_g1_i1|m.9823	7.51	glutathione S-transferase [EC:2.5.1.18]	Metabolism
c11893_g1_i2	c11893_g1_i2|m.9824	4.35	adenosine deaminase [EC:3.5.4.4]	Metabolism
c11894_g1_i2	c11894_g1_i2|m.9826	2.25	platelet-activating factor acetylhydrolase IB subunit beta/gamma [EC:3.1.1.47]	Metabolism
c11897_g1_i1	c11897_g1_i1|m.9832	14.7	methylsterol monooxygenase [EC:1.14.13.72]	Metabolism
c11899_g1_i1	c11899_g1_i1|m.9836	6.24	transcription initiation factor TFIID subunit 7	Genetic Information Processing
c11909_g1_i1	c11909_g1_i1|m.9871	7.17	sodium/potassium-transporting ATPase subunit beta	Environmental Information Processing
c11909_g1_i2	c11909_g1_i2|m.9872	6.4	sodium/potassium-transporting ATPase subunit beta	Environmental Information Processing
c11913_g2_i1	c11913_g2_i1|m.9880	1.89	inositol polyphosphate 1-phosphatase [EC:3.1.3.57]	Metabolism
c11920_g1_i1	c11920_g1_i1|m.9897	5	mitotic spindle assembly checkpoint protein MAD1	Cellular Processes
c11922_g1_i1	c11922_g1_i1|m.9899	15.53	5'-methylthioadenosine phosphorylase [EC:2.4.2.28]	Metabolism
c11922_g1_i2	c11922_g1_i2|m.9900	16.24	5'-methylthioadenosine phosphorylase [EC:2.4.2.28]	Metabolism
c11924_g1_i1	c11924_g1_i1|m.9902	7.86	spermine synthase [EC:2.5.1.22]	Metabolism
c11924_g1_i2	c11924_g1_i2|m.9903	8.01	spermine synthase [EC:2.5.1.22]	Metabolism
c11924_g1_i2	c11924_g1_i2|m.9904	8.01	spermine synthase [EC:2.5.1.22]	Metabolism
c11929_g1_i1	c11929_g1_i1|m.9917	15.76	ETS translocation variant 6/7	Environmental Information Processing
c11939_g1_i1	c11939_g1_i1|m.9955	40.11	geranylgeranyl diphosphate synthase, type III [EC:2.5.1.1 2.5.1.10 2.5.1.29]	Metabolism
c11939_g1_i1	c11939_g1_i1|m.9956	40.11	mediator of RNA polymerase II transcription subunit 4	Cellular Processes
c11943_g1_i1	c11943_g1_i1|m.9960	36.37	carbonyl reductase 1 [EC:1.1.1.184 1.1.1.189 1.1.1.197]	Metabolism
c11944_g1_i1	c11944_g1_i1|m.9961	28.18	kinesin family member 5	Cellular Processes
c11946_g2_i1	c11946_g2_i1|m.9968	16.61	6-phosphogluconolactonase [EC:3.1.1.31]	Metabolism
c11951_g1_i1	c11951_g1_i1|m.9974	4.65	RAC serine/threonine-protein kinase [EC:2.7.11.1]	Environmental Information Processing
c11956_g1_i1	c11956_g1_i1|m.9994	2.26	deltex [EC:2.3.2.27]	Environmental Information Processing
c11962_g1_i1	c11962_g1_i1|m.10007	11.33	golgi phosphoprotein 3	Cellular Processes
c11962_g1_i2	c11962_g1_i2|m.10008	12.59	golgi phosphoprotein 3	Cellular Processes
c11966_g1_i1	c11966_g1_i1|m.10012	118.19	acyl-CoA dehydrogenase [EC:1.3.8.7]	Metabolism
c11968_g1_i1	c11968_g1_i1|m.10016	2.39	peroxin-12	Cellular Processes
c11968_g1_i2	c11968_g1_i2|m.10017	1.69	peroxin-12	Cellular Processes
c1197_g1_i1	c1197_g1_i1|m.355	0.14	actin beta/gamma 1	Environmental Information Processing
c11975_g1_i1	c11975_g1_i1|m.10042	50.68	alanine-glyoxylate transaminase / serine-glyoxylate transaminase / serine-pyruvate transaminase [EC:2.6.1.44 2.6.1.45 2.6.1.51]	Metabolism
c11978_g1_i1	c11978_g1_i1|m.10046	2.96	calcium release-activated calcium channel protein 1	Environmental Information Processing
c11978_g1_i2	c11978_g1_i2|m.10048	2.12	calcium release-activated calcium channel protein 1	Environmental Information Processing
c11978_g1_i3	c11978_g1_i3|m.10050	2.51	calcium release-activated calcium channel protein 1	Environmental Information Processing
c11979_g1_i1	c11979_g1_i1|m.10052	2.17	hydroxymethylglutaryl-CoA reductase (NADPH) [EC:1.1.1.34]	Metabolism
c11980_g1_i1	c11980_g1_i1|m.10053	9.12	Mpv17-like protein	Cellular Processes
c11981_g1_i2	c11981_g1_i2|m.10054	1.73	DNA polymerase delta subunit 2	Metabolism
c11983_g1_i1	c11983_g1_i1|m.10059	2.98	early growth response protein 1	Cellular Processes
c11983_g1_i2	c11983_g1_i2|m.10061	3.5	early growth response protein 1	Cellular Processes
c11983_g1_i3	c11983_g1_i3|m.10063	3.35	early growth response protein 1	Cellular Processes
c11985_g1_i1	c11985_g1_i1|m.10066	5.47	peptide-N4-(N-acetyl-beta-glucosaminyl)asparagine amidase [EC:3.5.1.52]	Genetic Information Processing
c11985_g1_i2	c11985_g1_i2|m.10067	6.1	peptide-N4-(N-acetyl-beta-glucosaminyl)asparagine amidase [EC:3.5.1.52]	Genetic Information Processing
c11987_g1_i1	c11987_g1_i1|m.10071	5.73	hepatic leukemia factor	Cellular Processes
c11987_g1_i2	c11987_g1_i2|m.10072	6.13	hepatic leukemia factor	Cellular Processes
c11987_g1_i3	c11987_g1_i3|m.10073	7.68	hepatic leukemia factor	Cellular Processes
c11991_g1_i1	c11991_g1_i1|m.10081	2.49	dolichol kinase [EC:2.7.1.108]	Metabolism
c11991_g1_i3	c11991_g1_i3|m.10083	1.67	dolichol kinase [EC:2.7.1.108]	Metabolism
c11991_g1_i4	c11991_g1_i4|m.10084	3.11	dolichol kinase [EC:2.7.1.108]	Metabolism
c11997_g1_i1	c11997_g1_i1|m.10091	14.91	superoxide dismutase, Cu-Zn family [EC:1.15.1.1]	Cellular Processes
c11999_g1_i1	c11999_g1_i1|m.10096	37.8	6-phosphofructo-2-kinase / fructose-2,6-biphosphatase 2 [EC:2.7.1.105 3.1.3.46]	Metabolism
c11999_g1_i2	c11999_g1_i2|m.10097	32.16	6-phosphofructo-2-kinase / fructose-2,6-biphosphatase 2 [EC:2.7.1.105 3.1.3.46]	Metabolism
c11999_g1_i3	c11999_g1_i3|m.10098	44.6	6-phosphofructo-2-kinase / fructose-2,6-biphosphatase 2 [EC:2.7.1.105 3.1.3.46]	Metabolism
c11999_g1_i4	c11999_g1_i4|m.10099	32.22	6-phosphofructo-2-kinase / fructose-2,6-biphosphatase 2 [EC:2.7.1.105 3.1.3.46]	Metabolism
c12000_g1_i1	c12000_g1_i1|m.10100	16.86	gamma-glutamyltranspeptidase / glutathione hydrolase / leukotriene-C4 hydrolase [EC:2.3.2.2 3.4.19.13 3.4.19.14]	Metabolism
c12000_g1_i2	c12000_g1_i2|m.10101	13.92	gamma-glutamyltranspeptidase / glutathione hydrolase / leukotriene-C4 hydrolase [EC:2.3.2.2 3.4.19.13 3.4.19.14]	Metabolism
c12001_g1_i1	c12001_g1_i1|m.10102	47.54	actin beta/gamma 1	Environmental Information Processing
c12006_g1_i1	c12006_g1_i1|m.10114	12.04	hypoxia-inducible factor prolyl hydroxylase [EC:1.14.11.29]	Environmental Information Processing
c12009_g1_i1	c12009_g1_i1|m.10119	11.12	ubiquitin-conjugating enzyme E2 W [EC:2.3.2.25]	Genetic Information Processing
c12016_g1_i1	c12016_g1_i1|m.10150	19.75	trypsin [EC:3.4.21.4]	Environmental Information Processing
c12016_g1_i2	c12016_g1_i2|m.10151	46.97	trypsin [EC:3.4.21.4]	Environmental Information Processing
c12017_g1_i1	c12017_g1_i1|m.10152	3.21	sn1-specific diacylglycerol lipase [EC:3.1.1.-]	Cellular Processes
c12019_g1_i1	c12019_g1_i1|m.10157	41.38	20S proteasome subunit beta 7 [EC:3.4.25.1]	Genetic Information Processing
c12022_g1_i1	c12022_g1_i1|m.10161	8.85	tuberous sclerosis 1	Environmental Information Processing
c12026_g1_i1	c12026_g1_i1|m.10169	24.31	U3 small nucleolar ribonucleoprotein protein IMP4	Genetic Information Processing
c12031_g1_i1	c12031_g1_i1|m.10179	6.02	transcription initiation factor TFIIF subunit alpha	Genetic Information Processing
c12031_g1_i1	c12031_g1_i1|m.10180	6.02	transcription initiation factor TFIIF subunit alpha	Genetic Information Processing
c12031_g1_i3	c12031_g1_i3|m.10181	7.17	transcription initiation factor TFIIF subunit alpha	Genetic Information Processing
c12034_g1_i1	c12034_g1_i1|m.10187	75.53	interferon, gamma-inducible protein 30	Cellular Processes
c12040_g1_i1	c12040_g1_i1|m.10197	9.86	inosine triphosphate pyrophosphatase [EC:3.6.1.19]	Metabolism
c12046_g1_i1	c12046_g1_i1|m.10209	4.57	wolfamin	Genetic Information Processing
c1205_g1_i1	c1205_g1_i1|m.358	21.52	glutathione S-transferase [EC:2.5.1.18]	Metabolism
c12053_g1_i1	c12053_g1_i1|m.10217	4.44	cyclic pyranopterin phosphate synthase [EC:4.1.99.18]	Metabolism
c12053_g1_i2	c12053_g1_i2|m.10218	4.26	cyclic pyranopterin phosphate synthase [EC:4.1.99.18]	Metabolism
c12053_g1_i2	c12053_g1_i2|m.10219	4.26	cyclic pyranopterin phosphate synthase [EC:4.1.99.18]	Metabolism
c12053_g1_i3	c12053_g1_i3|m.10220	3.48	cyclic pyranopterin phosphate synthase [EC:4.1.99.18]	Metabolism
c12053_g1_i4	c12053_g1_i4|m.10221	3.51	cyclic pyranopterin phosphate synthase [EC:4.1.99.18]	Metabolism
c12054_g1_i1	c12054_g1_i1|m.10222	6.86	hepatocyte growth factor-regulated tyrosine kinase substrate	Cellular Processes
c12054_g1_i2	c12054_g1_i2|m.10223	7.33	hepatocyte growth factor-regulated tyrosine kinase substrate	Cellular Processes
c12054_g1_i2	c12054_g1_i2|m.10224	7.33	hepatocyte growth factor-regulated tyrosine kinase substrate	Cellular Processes
c12055_g1_i1	c12055_g1_i1|m.10225	5.31	alcohol-forming fatty acyl-CoA reductase [EC:1.2.1.84]	Metabolism
c12057_g1_i1	c12057_g1_i1|m.10230	8.87	E3 ubiquitin-protein ligase SIAH1 [EC:2.3.2.27]	Genetic Information Processing
c1206_g1_i1	c1206_g1_i1|m.359	0.52	DNA polymerase epsilon subunit 1 [EC:2.7.7.7]	Metabolism
c1206_g2_i1	c1206_g2_i1|m.360	0.6	DNA polymerase epsilon subunit 1 [EC:2.7.7.7]	Metabolism
c12060_g1_i1	c12060_g1_i1|m.10237	5.71	protein expanded	Environmental Information Processing
c12064_g1_i1	c12064_g1_i1|m.10244	43.65	heat shock 70kDa protein 1/8	Genetic Information Processing
c12066_g1_i1	c12066_g1_i1|m.10247	2075.3	glyceraldehyde 3-phosphate dehydrogenase [EC:1.2.1.12]	Metabolism
c12069_g1_i1	c12069_g1_i1|m.10252	95.53	translation initiation factor 4E	Genetic Information Processing
c1207_g1_i1	c1207_g1_i1|m.361	1.32	serine/threonine-protein kinase TTK/MPS1 [EC:2.7.12.1]	Cellular Processes
c12072_g1_i1	c12072_g1_i1|m.10256	15.89	carbonyl reductase 1 [EC:1.1.1.184 1.1.1.189 1.1.1.197]	Metabolism
c12076_g1_i1	c12076_g1_i1|m.10269	62.1	NADH dehydrogenase (ubiquinone) 1 alpha subcomplex subunit 10	Metabolism
c12082_g1_i1	c12082_g1_i1|m.10283	23.6	hypoxia-inducible factor 1 alpha	Environmental Information Processing
c12082_g1_i2	c12082_g1_i2|m.10284	17.42	hypoxia-inducible factor 1 alpha	Environmental Information Processing
c12082_g1_i3	c12082_g1_i3|m.10285	20.3	hypoxia-inducible factor 1 alpha	Environmental Information Processing
c12083_g1_i1	c12083_g1_i1|m.10286	93.6	lysyl-tRNA synthetase, class II [EC:6.1.1.6]	Genetic Information Processing
c12087_g1_i1	c12087_g1_i1|m.10291	17.99	E3 ubiquitin-protein ligase synoviolin [EC:2.3.2.27]	Genetic Information Processing
c12092_g1_i1	c12092_g1_i1|m.10298	4.22	cGMP-dependent 3',5'-cyclic phosphodiesterase [EC:3.1.4.17]	Metabolism
c12092_g1_i2	c12092_g1_i2|m.10299	3.53	cGMP-dependent 3',5'-cyclic phosphodiesterase [EC:3.1.4.17]	Metabolism
c12094_g1_i1	c12094_g1_i1|m.10302	7.52	cystinosin	Cellular Processes
c12095_g1_i1	c12095_g1_i1|m.10303	9.77	mRNA-capping enzyme [EC:2.7.7.50 3.6.1.-]	Genetic Information Processing
c12097_g1_i1	c12097_g1_i1|m.10306	2.28	phosphopantothenate-cysteine ligase [EC:6.3.2.5]	Metabolism
c12097_g1_i2	c12097_g1_i2|m.10307	2.54	phosphopantothenate-cysteine ligase [EC:6.3.2.5]	Metabolism
c12099_g1_i1	c12099_g1_i1|m.10309	148.21	adenosine kinase [EC:2.7.1.20]	Metabolism
c12101_g1_i1	c12101_g1_i1|m.10311	5.01	THO complex subunit 3	Genetic Information Processing
c12104_g1_i1	c12104_g1_i1|m.10322	16.51	proto-oncogene C-crk	Environmental Information Processing
[truncated: 3,987 more rows]

## Sheet: Luciola_Uniprot
Transcript ID	Transdecoder ID	FPKM	uniprot_sprot database			%Identity	E-value (1E-05)
[truncated: 14,855 more rows]
[truncated: 1 more columns]
