# Supplementary material for: Transcriptome analysis reveals candidate genes involved in luciferin metabolism in Luciola aquatilis (Coleoptera: Lampyridae)
Source: PeerJ. 2016 Oct 4;4:e2534. doi: 10.7717/peerj.2534 (PMC5068357; doi:10.7717/peerj.2534)
Supplement: File S3 [file peerj-04-2534-s003.xlsx]

## Sheet: Luciola_Tribolium_BBH
Gene name of Luciola aquatilis	Protein functions	%Identity	E-value
c10000_g1_i1|m.6553	gi|642912518|ref|XP_008200898.1| PREDICTED: lysine-specific histone demethylase 1A [Tribolium castaneum]	84.3	0
c100_g1_i1|m.30	gi|91086611|ref|XP_974024.1| PREDICTED: NF-kappa-B inhibitor-interacting Ras-like protein 2 [Tribolium castaneum]	70.71	5e-97
c10004_g1_i1|m.6556	gi|642921188|ref|XP_008192753.1| PREDICTED: reticulon-1-A-like isoform X3 [Tribolium castaneum]	77.38	8e-140
c10004_g1_i2|m.6557	gi|642921192|ref|XP_008192755.1| PREDICTED: reticulon-1-A-like isoform X5 [Tribolium castaneum]	83.1	5e-120
c10004_g1_i3|m.6558	gi|189236779|ref|XP_967166.2| PREDICTED: reticulon-1-like isoform X1 [Tribolium castaneum]	55.68	2e-147
c10005_g1_i1|m.6559	gi|642930718|ref|XP_008200000.1| PREDICTED: uncharacterized protein LOC656468 [Tribolium castaneum]	67.27	4e-63
c10006_g1_i1|m.6561	gi|642926791|ref|XP_008195017.1| PREDICTED: uncharacterized protein LOC103313467 [Tribolium castaneum]	46.48	3e-43
c10008_g1_i1|m.6562	gi|156564242|ref|NP_001096047.1| chitin deacetylase 2 isoform A precursor [Tribolium castaneum]	86.92	0
c10008_g1_i2|m.6563	gi|170784826|ref|NP_001116303.1| chitin deacetylase 2 isoform B precursor [Tribolium castaneum]	89.58	0
c10011_g1_i1|m.6568	gi|642930465|ref|XP_974795.3| PREDICTED: protein YIF1B [Tribolium castaneum]	60.64	3e-144
c10012_g1_i1|m.6569	gi|91080109|ref|XP_967250.1| PREDICTED: uncharacterized protein LOC655596 isoform X1 [Tribolium castaneum]	69.33	0
c10013_g1_i1|m.6571	gi|642914975|ref|XP_008190466.1| PREDICTED: sialic acid synthase [Tribolium castaneum]	61	8e-145
c10014_g1_i1|m.6572	gi|642935142|ref|XP_008197905.1| PREDICTED: putative acyl-activating enzyme 19 [Tribolium castaneum]	62.12	0
c10016_g1_i1|m.6577	gi|91076478|ref|XP_972409.1| PREDICTED: slit homolog 3 protein [Tribolium castaneum]	80.17	0
c10017_g1_i1|m.6579	gi|642910643|ref|XP_008200041.1| PREDICTED: LOW QUALITY PROTEIN: plexin-B [Tribolium castaneum]	83.83	0
c10019_g1_i1|m.6580	gi|642915056|ref|XP_008190391.1| PREDICTED: uncharacterized protein LOC103312182 [Tribolium castaneum]	48.08	1e-29
c10019_g2_i2|m.6581	gi|642915059|ref|XP_008190392.1| PREDICTED: leucine-rich repeat-containing protein ODA7 isoform X2 [Tribolium castaneum]	57.09	1e-98
c10021_g1_i1|m.6596	gi|189235566|ref|XP_970111.2| PREDICTED: sphingosine kinase 2 [Tribolium castaneum]	67.18	0
c10022_g1_i1|m.6597	gi|642913920|ref|XP_008201214.1| PREDICTED: uncharacterized protein LOC103315121 [Tribolium castaneum]	41.96	1e-34
c10025_g1_i1|m.6598	gi|642923261|ref|XP_008193681.1| PREDICTED: T-cell activation inhibitor, mitochondrial [Tribolium castaneum]	56.93	0
c10027_g1_i1|m.6606	gi|91089307|ref|XP_971761.1| PREDICTED: uncharacterized protein LOC660437 [Tribolium castaneum]	31.64	9e-30
c10030_g1_i1|m.6608	gi|642923825|ref|XP_008193895.1| PREDICTED: pseudouridine-metabolizing bifunctional protein C1861.05 [Tribolium castaneum]	49.28	0
c10032_g1_i1|m.6610	gi|91076592|ref|XP_968333.1| PREDICTED: charged multivesicular body protein 5 [Tribolium castaneum]	83.26	6e-136
c10033_g1_i1|m.6611	gi|642921539|ref|XP_967583.3| PREDICTED: RING-box protein 1A [Tribolium castaneum]	94.69	1e-77
c10036_g1_i1|m.6614	gi|91086813|ref|XP_973672.1| PREDICTED: neutral and basic amino acid transport protein rBAT [Tribolium castaneum]	49.91	0
c10037_g1_i1|m.6615	gi|642913781|ref|XP_008201158.1| PREDICTED: programmed cell death protein 2-like [Tribolium castaneum]	62.59	5e-177
c10038_g1_i1|m.6616	gi|642911041|ref|XP_967134.2| PREDICTED: trans-1,2-dihydrobenzene-1,2-diol dehydrogenase-like [Tribolium castaneum]	55.12	5e-145
c10040_g1_i1|m.6617	gi|91078970|ref|XP_974395.1| PREDICTED: uncharacterized protein LOC663246 [Tribolium castaneum]	56.8	2e-124
c10042_g1_i1|m.6620	gi|642934322|ref|XP_008198600.1| PREDICTED: inositol hexakisphosphate kinase 1 isoform X2 [Tribolium castaneum]	70.31	0
c10043_g1_i1|m.6622	gi|642931000|ref|XP_008196172.1| PREDICTED: uncharacterized protein LOC103313785 [Tribolium castaneum]	55.17	2e-55
c10044_g1_i2|m.6624	gi|91084971|ref|XP_972074.1| PREDICTED: putative tricarboxylate transport protein, mitochondrial [Tribolium castaneum]	79.74	0
c10047_g1_i1|m.6629	gi|642934303|ref|XP_008198590.1| PREDICTED: pancreatic triacylglycerol lipase-like [Tribolium castaneum]	63.95	3e-163
c10048_g1_i1|m.6631	gi|189241532|ref|XP_969755.2| PREDICTED: transmembrane emp24 domain-containing protein 3 [Tribolium castaneum]	82.05	4e-123
c10049_g1_i1|m.6632	gi|642939095|ref|XP_008200219.1| PREDICTED: AH receptor-interacting protein [Tribolium castaneum]	64.24	5e-156
c10050_g1_i1|m.6634	gi|91084983|ref|XP_972380.1| PREDICTED: transmembrane protein 134 [Tribolium castaneum]	70.12	5e-83
c10051_g1_i1|m.6635	gi|642916354|ref|XP_975085.2| PREDICTED: snurportin-1 [Tribolium castaneum]	43.24	4e-73
c10052_g1_i1|m.6636	gi|642931805|ref|XP_008196738.1| PREDICTED: LOW QUALITY PROTEIN: multiple inositol polyphosphate phosphatase 1 [Tribolium castaneum]	44.95	6e-127
c10053_g1_i1|m.6637	gi|189236935|ref|XP_001807287.1| PREDICTED: uncharacterized protein LOC100141930 isoform X1 [Tribolium castaneum]	45.97	7e-76
c10054_g1_i1|m.6638	gi|642921313|ref|XP_008192815.1| PREDICTED: proteasome maturation protein [Tribolium castaneum]	58.45	1e-51
c10056_g1_i1|m.6639	gi|91087337|ref|XP_975603.1| PREDICTED: enolase-phosphatase E1-like [Tribolium castaneum]	52.42	8e-81
c10057_g1_i1|m.6643	gi|91078140|ref|XP_973588.1| PREDICTED: uncharacterized protein LOC662397 [Tribolium castaneum]	41.3	4e-80
c10058_g1_i1|m.6644	gi|642936602|ref|XP_972648.2| PREDICTED: NECAP-like protein CG9132 [Tribolium castaneum]	76.23	2e-126
c10059_g1_i1|m.6645	gi|91088011|ref|XP_973916.1| PREDICTED: 40S ribosomal protein S26 [Tribolium castaneum]	94.83	1e-75
c10060_g1_i1|m.6646	gi|91093965|ref|XP_968405.1| PREDICTED: epididymal secretory protein E1 [Tribolium castaneum]	47.73	2e-41
c10061_g1_i1|m.6647	gi|91080939|ref|XP_974274.1| PREDICTED: signal peptidase complex subunit 3 [Tribolium castaneum]	91.62	8e-112
c10065_g1_i1|m.6651	gi|642931832|ref|XP_008196749.1| PREDICTED: GPI inositol-deacylase [Tribolium castaneum]	50.38	0
c10066_g1_i3|m.6656	gi|642935036|ref|XP_008199915.1| PREDICTED: complexin isoform X1 [Tribolium castaneum]	96.4	1e-53
c10067_g1_i1|m.6657	gi|91082217|ref|XP_972523.1| PREDICTED: protein FAM210B [Tribolium castaneum]	61.86	4e-44
c10069_g1_i2|m.6662	gi|91084965|ref|XP_971914.1| PREDICTED: transmembrane emp24 domain-containing protein 2 [Tribolium castaneum]	81	9e-115
c10070_g1_i1|m.6664	gi|91083141|ref|XP_971340.1| PREDICTED: akirin [Tribolium castaneum]	68.65	3e-78
c10072_g1_i1|m.6665	gi|91081787|ref|XP_973692.1| PREDICTED: uncharacterized protein LOC662508 [Tribolium castaneum]	64.06	9e-125
c10073_g1_i1|m.6667	gi|642919219|ref|XP_969254.2| PREDICTED: peroxiredoxin-5, mitochondrial [Tribolium castaneum]	70.74	5e-98
c10074_g1_i2|m.6670	gi|642914203|ref|XP_008201588.1| PREDICTED: zinc finger and BTB domain-containing protein 40 isoform X3 [Tribolium castaneum]	73.91	4e-87
c10075_g1_i1|m.6672	gi|91077304|ref|XP_974600.1| PREDICTED: ras-like protein 1 [Tribolium castaneum]	88.89	1e-112
c10077_g1_i1|m.6673	gi|91088189|ref|XP_972722.1| PREDICTED: dehydrodolichyl diphosphate synthase [Tribolium castaneum]	57.99	2e-125
c10078_g1_i1|m.6675	gi|201023275|ref|NP_001128383.1| mitochondrial ribosomal protein L1 [Tribolium castaneum]	65.51	2e-139
c10079_g1_i1|m.6676	gi|642918013|ref|XP_008198979.1| PREDICTED: cytochrome c1, heme protein, mitochondrial [Tribolium castaneum]	73.87	5e-107
c10080_g1_i1|m.6677	gi|189236112|ref|XP_974011.2| PREDICTED: putative N-acetylglucosamine-6-phosphate deacetylase [Tribolium castaneum]	65.56	0
c10081_g1_i1|m.6678	gi|642912056|ref|XP_008199074.1| PREDICTED: nuclear factor 1 C-type isoform X6 [Tribolium castaneum]	82.48	3e-171
c10085_g1_i1|m.6686	gi|642933924|ref|XP_008197569.1| PREDICTED: protein Skeletor, isoforms B/C isoform X1 [Tribolium castaneum]	78.46	0
c10086_g1_i1|m.6687	gi|642933386|ref|XP_008197395.1| PREDICTED: HEAT repeat-containing protein 2 [Tribolium castaneum]	57.28	0
c10087_g1_i1|m.6689	gi|91088843|ref|XP_966427.1| PREDICTED: ankyrin repeat domain-containing protein 40 isoform X1 [Tribolium castaneum]	64.4	3e-109
c10089_g2_i1|m.6691	gi|642923492|ref|XP_967512.2| PREDICTED: glycoprotein 3-alpha-L-fucosyltransferase A [Tribolium castaneum]	69.07	0
c10091_g1_i1|m.6695	gi|91089709|ref|XP_974931.1| PREDICTED: eukaryotic translation initiation factor 4E-binding protein 2 [Tribolium castaneum]	54.7	5e-36
c10092_g1_i1|m.6696	gi|91092236|ref|XP_971180.1| PREDICTED: probable very-long-chain enoyl-CoA reductase art-1 [Tribolium castaneum]	51.37	2e-117
c10094_g1_i2|m.6698	gi|91078878|ref|XP_972869.1| PREDICTED: E3 ubiquitin-protein ligase NRDP1 isoform X2 [Tribolium castaneum]	85.71	0
c10095_g1_i1|m.6699	gi|642910446|ref|XP_008190741.1| PREDICTED: major facilitator superfamily domain-containing protein 6-like [Tribolium castaneum]	64.67	0
c10096_g1_i2|m.6702	gi|642920570|ref|XP_008192465.1| PREDICTED: synaptotagmin 1 isoform X1 [Tribolium castaneum]	88.69	0
c10097_g1_i1|m.6703	gi|642920839|ref|XP_008192579.1| PREDICTED: facilitated trehalose transporter Tret1-like [Tribolium castaneum]	52.78	9e-165
c10098_g1_i1|m.6704	gi|91083221|ref|XP_973529.1| PREDICTED: DNA replication complex GINS protein SLD5 [Tribolium castaneum]	48.76	5e-60
c10099_g1_i1|m.6705	gi|642914756|ref|XP_008190340.1| PREDICTED: AT-rich interactive domain-containing protein 5B [Tribolium castaneum]	61.62	0
c10100_g1_i1|m.6707	gi|91077554|ref|XP_972108.1| PREDICTED: 39S ribosomal protein L2, mitochondrial [Tribolium castaneum]	70.07	4e-148
c10101_g1_i1|m.6708	gi|91090426|ref|XP_971543.1| PREDICTED: ADP-ribosylation factor-like protein 6-interacting protein 1 isoform X2 [Tribolium castaneum]	50.84	2e-66
c10102_g1_i1|m.6709	gi|642916768|ref|XP_008192537.1| PREDICTED: peptidoglycan-recognition protein LA-like [Tribolium castaneum]	37.98	4e-70
c10103_g1_i1|m.6710	gi|91081869|ref|XP_968358.1| PREDICTED: ATP synthase subunit g, mitochondrial [Tribolium castaneum]	66.67	1e-45
c10105_g1_i1|m.6712	gi|642919960|ref|XP_008192145.1| PREDICTED: probable glutamine-dependent NAD(+) synthetase [Tribolium castaneum]	74.72	0
c10107_g1_i1|m.6714	gi|91079490|ref|XP_968591.1| PREDICTED: ADP-ribosylation factor-like protein 6-interacting protein 4 [Tribolium castaneum]	80.26	2e-42
c10108_g1_i1|m.6715	gi|91082445|ref|XP_971148.1| PREDICTED: charged multivesicular body protein 1b [Tribolium castaneum]	77.83	1e-101
c10109_g1_i1|m.6716	gi|642913783|ref|XP_008201159.1| PREDICTED: ADAM 17-like protease isoform X1 [Tribolium castaneum]	78.01	0
c10110_g1_i1|m.6717	gi|642926488|ref|XP_008191976.1| PREDICTED: probable ATP-dependent RNA helicase kurz [Tribolium castaneum]	65.15	0
c10112_g1_i1|m.6721	gi|91086315|ref|XP_973973.1| PREDICTED: vesicle transport protein USE1 [Tribolium castaneum]	59.63	3e-79
c10115_g1_i1|m.6725	gi|91094271|ref|XP_970021.1| PREDICTED: F-box/LRR-repeat protein 7 [Tribolium castaneum]	77.58	0
c10116_g1_i2|m.6728	gi|642934644|ref|XP_008197750.1| PREDICTED: CKLF-like MARVEL transmembrane domain-containing protein 8 [Tribolium castaneum]	67.07	6e-48
c10117_g1_i1|m.6729	gi|91083243|ref|XP_973851.1| PREDICTED: guanine nucleotide-binding protein subunit beta-2 [Tribolium castaneum]	80.69	0
c10118_g1_i1|m.6731	gi|642921357|ref|XP_008192836.1| PREDICTED: monocarboxylate transporter 9-like [Tribolium castaneum]	36.83	5e-112
c10119_g1_i1|m.6732	gi|91089285|ref|XP_970985.1| PREDICTED: cytoplasmic phosphatidylinositol transfer protein 1 [Tribolium castaneum]	71.71	1e-164
c10120_g1_i2|m.6734	gi|91084105|ref|XP_975991.1| PREDICTED: neprilysin-2 isoform X3 [Tribolium castaneum]	72.19	0
c10120_g1_i4|m.6736	gi|642924917|ref|XP_008194096.1| PREDICTED: neprilysin-2 isoform X2 [Tribolium castaneum]	70.51	0
c10121_g1_i1|m.6737	gi|642923303|ref|XP_008193695.1| PREDICTED: solute carrier family 25 member 51 [Tribolium castaneum]	60	4e-122
c10122_g1_i1|m.6738	gi|189238823|ref|XP_976228.2| PREDICTED: lysM and putative peptidoglycan-binding domain-containing protein 3 [Tribolium castaneum]	52.28	3e-65
c10123_g1_i1|m.6739	gi|642933291|ref|XP_008197359.1| PREDICTED: cytochrome b5 reductase 4 isoform X2 [Tribolium castaneum]	53.21	7e-145
c10124_g2_i2|m.6744	gi|642936312|ref|XP_008198391.1| PREDICTED: dedicator of cytokinesis protein 3 [Tribolium castaneum]	77.16	0
c10125_g1_i2|m.6749	gi|642919949|ref|XP_008192140.1| PREDICTED: protein ovo isoform X2 [Tribolium castaneum]	73.51	0
c10127_g1_i1|m.6753	gi|91085175|ref|XP_971032.1| PREDICTED: ubiquitin-conjugating enzyme E2 G1 [Tribolium castaneum]	97.01	7e-120
c10128_g1_i1|m.6755	gi|642922046|ref|XP_008192998.1| PREDICTED: lysosome-associated membrane glycoprotein 1, partial [Tribolium castaneum]	44.75	3e-42
c10129_g1_i3|m.6758	gi|642911031|ref|XP_008193516.1| PREDICTED: cytoplasmic polyadenylation element-binding protein 2 [Tribolium castaneum]	81.23	0
c10132_g1_i1|m.6763	gi|91089873|ref|XP_971596.1| PREDICTED: ruvB-like helicase 1 [Tribolium castaneum]	90.79	0
c10133_g1_i1|m.6764	gi|642927898|ref|XP_973997.3| PREDICTED: gamma-tubulin complex component 4 [Tribolium castaneum]	46.82	0
c10134_g1_i1|m.6765	gi|642936522|ref|XP_008198471.1| PREDICTED: BRCA1-A complex subunit BRE-like [Tribolium castaneum]	39.21	6e-80
c10135_g1_i1|m.6766	gi|642929317|ref|XP_008195784.1| PREDICTED: stomatin-like protein 2, mitochondrial isoform X1 [Tribolium castaneum]	74.2	0
c10136_g1_i1|m.6767	gi|642936592|ref|XP_008198498.1| PREDICTED: solute carrier family 2, facilitated glucose transporter member 1-like isoform X1 [Tribolium castaneum]	55.56	0
c10136_g1_i2|m.6768	gi|642936594|ref|XP_008198499.1| PREDICTED: solute carrier family 2, facilitated glucose transporter member 1-like isoform X2 [Tribolium castaneum]	56.83	0
c10137_g1_i3|m.6770	gi|642924747|ref|XP_008194424.1| PREDICTED: tyrosine-protein kinase PR2 isoform X3 [Tribolium castaneum]	71.29	0
c10139_g1_i1|m.6772	gi|642910459|ref|XP_008190747.1| PREDICTED: fibroblast growth factor receptor homolog 1-like isoform X1 [Tribolium castaneum]	74.49	0
c10139_g1_i2|m.6773	gi|642910461|ref|XP_008190748.1| PREDICTED: fibroblast growth factor receptor homolog 1-like isoform X2 [Tribolium castaneum]	73.38	0
c10142_g1_i1|m.6780	gi|642928639|ref|XP_008199716.1| PREDICTED: cyclin-dependent kinase 5 [Tribolium castaneum]	96.98	0
c10143_g1_i1|m.6782	gi|642919843|ref|XP_008192092.1| PREDICTED: TIP41-like protein [Tribolium castaneum]	61.54	2e-132
c10147_g1_i1|m.6785	gi|91076922|ref|XP_969234.1| PREDICTED: alpha-amylase [Tribolium castaneum]	58.3	0
c10148_g1_i1|m.6788	gi|189237630|ref|XP_970913.2| PREDICTED: intersectin-1 [Tribolium castaneum]	82.95	0
c10149_g1_i1|m.6789	gi|91081061|ref|XP_975415.1| PREDICTED: 40S ribosomal protein S2 [Tribolium castaneum]	96.17	4e-166
c10150_g1_i1|m.6790	gi|642930119|ref|XP_008196260.1| PREDICTED: poly(U)-specific endoribonuclease homolog [Tribolium castaneum]	44.56	4e-109
c10152_g1_i4|m.6793	gi|91087535|ref|XP_970133.1| PREDICTED: DNA-directed RNA polymerases I, II, and III subunit RPABC3 [Tribolium castaneum]	95.33	1e-104
c10155_g1_i1|m.6796	gi|642916471|ref|XP_008191058.1| PREDICTED: uncharacterized protein LOC103312363 [Tribolium castaneum]	34.92	3e-57
c10155_g1_i1|m.6797	gi|91080019|ref|XP_971957.1| PREDICTED: uncharacterized protein LOC660651 isoform X1 [Tribolium castaneum]	42.16	6e-41
c10156_g1_i1|m.6798	gi|91084075|ref|XP_967986.1| PREDICTED: regucalcin [Tribolium castaneum]	70.03	1e-161
c10157_g1_i1|m.6799	gi|91082807|ref|XP_968134.1| PREDICTED: general transcription factor IIF subunit 2 [Tribolium castaneum]	84.13	3e-158
c1016_g1_i1|m.282	gi|91092410|ref|XP_967365.1| PREDICTED: zinc finger HIT domain-containing protein 1 [Tribolium castaneum]	66.88	5e-79
c10160_g1_i1|m.6801	gi|91087153|ref|XP_975332.1| PREDICTED: 28S ribosomal protein S11, mitochondrial [Tribolium castaneum]	75.6	4e-93
c10162_g1_i1|m.6806	gi|91079286|ref|XP_972784.1| PREDICTED: syntaxin-17 [Tribolium castaneum]	42.42	4e-69
c10163_g1_i2|m.6808	gi|189242304|ref|XP_001808377.1| PREDICTED: uncharacterized protein LOC100141613 [Tribolium castaneum]	66.08	1e-66
c10165_g1_i1|m.6811	gi|189237189|ref|XP_001809029.1| PREDICTED: UPF0184 protein AAEL002161 [Tribolium castaneum]	53.85	2e-11
c10166_g1_i1|m.6812	gi|642914937|ref|XP_008190449.1| PREDICTED: cytokine receptor-like factor 3 [Tribolium castaneum]	46.35	3e-119
c10167_g1_i4|m.6817	gi|642935204|ref|XP_008199689.1| PREDICTED: kelch-like ECH-associated protein 1 isoform X2 [Tribolium castaneum]	84.85	0
c10168_g1_i1|m.6818	gi|189241122|ref|XP_001812931.1| PREDICTED: protein saal1 [Tribolium castaneum]	37.31	6e-78
c10171_g1_i2|m.6821	gi|282848147|ref|NP_001164292.1| kayak isoform A [Tribolium castaneum]	67.63	2e-137
c10171_g1_i3|m.6822	gi|282848151|ref|NP_001164294.1| kayak isoform C [Tribolium castaneum]	66.41	3e-138
c10173_g1_i2|m.6825	gi|642935111|ref|XP_008197892.1| PREDICTED: uncharacterized protein LOC103314234 [Tribolium castaneum]	38.45	4e-126
c10174_g1_i1|m.6827	gi|642934883|ref|XP_008197847.1| PREDICTED: DDB1- and CUL4-associated factor 7 isoform X2 [Tribolium castaneum]	95.4	0
c10176_g1_i1|m.6829	gi|91088067|ref|XP_967758.1| PREDICTED: UPF0047 protein C4A8.02c [Tribolium castaneum]	98.82	4e-124
c10177_g1_i1|m.6830	gi|91089675|ref|XP_974428.1| PREDICTED: probable trans-2-enoyl-CoA reductase, mitochondrial [Tribolium castaneum]	59.6	2e-160
c10178_g1_i1|m.6831	gi|189236245|ref|XP_001814319.1| PREDICTED: 2-oxo-4-hydroxy-4-carboxy-5-ureidoimidazoline decarboxylase [Tribolium castaneum]	43.45	3e-43
c10180_g1_i1|m.6832	gi|189236027|ref|XP_967504.2| PREDICTED: mitochondrial carrier homolog 2-like [Tribolium castaneum]	60.69	3e-126
c10181_g1_i1|m.6833	gi|91092520|ref|XP_971182.1| PREDICTED: endoplasmic reticulum resident protein 44 [Tribolium castaneum]	74.85	0
c10183_g1_i1|m.6835	gi|642914834|ref|XP_008194983.1| PREDICTED: inhibitor of growth protein 3 isoform X1 [Tribolium castaneum]	75.19	0
c10184_g1_i1|m.6837	gi|642929186|ref|XP_008195727.1| PREDICTED: putative gamma-glutamylcyclotransferase CG2811 isoform X2 [Tribolium castaneum]	57.82	1e-51
c10185_g1_i1|m.6839	gi|642914261|ref|XP_008201611.1| PREDICTED: proton-associated sugar transporter A-like [Tribolium castaneum]	66.94	0
c10186_g1_i1|m.6840	gi|189242051|ref|XP_968641.2| PREDICTED: DNA replication licensing factor Mcm3 [Tribolium castaneum]	73.51	0
c10187_g1_i1|m.6841	gi|642917405|ref|XP_008191183.1| PREDICTED: autophagy-related protein 16-1 [Tribolium castaneum]	63.06	3e-158
c10188_g1_i1|m.6843	gi|189240214|ref|XP_001807190.1| PREDICTED: uncharacterized protein LOC100142448 isoform X2 [Tribolium castaneum]	65.12	2e-124
c10189_g1_i1|m.6844	gi|91077082|ref|XP_969760.1| PREDICTED: protein NRDE2 homolog [Tribolium castaneum]	59.45	0
c10190_g1_i1|m.6845	gi|91093699|ref|XP_966579.1| PREDICTED: probable G-protein coupled receptor Mth-like 1 [Tribolium castaneum]	60.69	0
c10191_g1_i1|m.6846	gi|642911373|ref|XP_008199397.1| PREDICTED: syndecan [Tribolium castaneum]	55.98	3e-62
c10194_g1_i1|m.6850	gi|642913852|ref|XP_008201188.1| PREDICTED: protein spaetzle isoform X1 [Tribolium castaneum]	39.6	3e-31
c10195_g2_i1|m.6851	gi|642912719|ref|XP_008200974.1| PREDICTED: tyrosine kinase receptor Cad96Ca isoform X1 [Tribolium castaneum]	65.54	0
c10198_g1_i1|m.6854	gi|91090129|ref|XP_971541.1| PREDICTED: hsp70-binding protein 1 [Tribolium castaneum]	49.26	2e-110
c10200_g1_i1|m.6855	gi|91080735|ref|XP_975438.1| PREDICTED: RING finger protein 121 [Tribolium castaneum]	80.76	0
c10201_g1_i1|m.6856	gi|91078172|ref|XP_967060.1| PREDICTED: sorting nexin-27 [Tribolium castaneum]	86.05	0
c10202_g1_i1|m.6858	gi|642911017|ref|XP_008193510.1| PREDICTED: MAP kinase-activated protein kinase 2 [Tribolium castaneum]	86.09	0
c10203_g1_i1|m.6859	gi|91090924|ref|XP_974164.1| PREDICTED: annexin B9 [Tribolium castaneum]	70.61	7e-159
c10205_g1_i1|m.6862	gi|189234542|ref|XP_973179.2| PREDICTED: ubiquitin-like protein 7 [Tribolium castaneum]	57.43	1e-120
c10206_g1_i2|m.6865	gi|642910909|ref|XP_008193461.1| PREDICTED: katanin p60 ATPase-containing subunit A-like 1 [Tribolium castaneum]	81.14	0
c10207_g1_i1|m.6866	gi|642913326|ref|XP_008195269.1| PREDICTED: protein roadkill isoform X3 [Tribolium castaneum]	97.27	0
c10208_g1_i1|m.6867	gi|642913942|ref|XP_008201223.1| PREDICTED: phosphatidate phosphatase PPAPDC1A [Tribolium castaneum]	51.6	5e-84
c10209_g1_i1|m.6868	gi|189241493|ref|XP_967027.2| PREDICTED: ras GTPase-activating protein 1 [Tribolium castaneum]	88.71	0
c10211_g1_i1|m.6871	gi|189241734|ref|XP_966970.2| PREDICTED: ubiquinol-cytochrome-c reductase complex assembly factor 1 [Tribolium castaneum]	52.45	3e-70
c10212_g1_i1|m.6872	gi|642911376|ref|XP_008199398.1| PREDICTED: mono [ADP-ribose] polymerase PARP16-like [Tribolium castaneum]	46.32	4e-105
c10213_g1_i1|m.6873	gi|189237458|ref|XP_967667.2| PREDICTED: solute carrier family 35 member E2-like [Tribolium castaneum]	82.89	0
c10214_g1_i1|m.6874	gi|642923980|ref|XP_008193956.1| PREDICTED: adenylate cyclase type 10-like [Tribolium castaneum]	35.46	2e-67
c10216_g1_i4|m.6878	gi|642938156|ref|XP_969509.2| PREDICTED: cleavage and polyadenylation specificity factor subunit 5 [Tribolium castaneum]	90.61	3e-163
c10217_g2_i1|m.6880	gi|91088681|ref|XP_974930.1| PREDICTED: synaptic vesicle membrane protein VAT-1 homolog [Tribolium castaneum]	52.51	1e-125
c10218_g1_i1|m.6881	gi|224994817|ref|NP_001139342.1| phospholipase A2D precursor [Tribolium castaneum]	45.71	2e-41
c10220_g1_i2|m.6883	gi|642937299|ref|XP_008198776.1| PREDICTED: DNA excision repair protein ERCC-1 [Tribolium castaneum]	70.49	5e-127
c10222_g1_i1|m.6885	gi|91089541|ref|XP_971419.1| PREDICTED: protein canopy 4 [Tribolium castaneum]	74.64	3e-101
c10223_g1_i1|m.6886	gi|91092260|ref|XP_967199.1| PREDICTED: uncharacterized protein C6orf136 [Tribolium castaneum]	62.69	3e-92
c10225_g1_i2|m.6889	gi|91085815|ref|XP_974770.1| PREDICTED: maternal protein exuperantia-1 [Tribolium castaneum]	64.23	0
c10226_g1_i1|m.6890	gi|91080101|ref|XP_966721.1| PREDICTED: uncharacterized protein F13E9.13, mitochondrial [Tribolium castaneum]	58.89	3e-122
c10227_g1_i1|m.6891	gi|91087995|ref|XP_973673.1| PREDICTED: protein transport protein Sec31A [Tribolium castaneum]	61.96	0
c10228_g1_i1|m.6892	gi|91089527|ref|XP_971048.1| PREDICTED: protein penguin [Tribolium castaneum]	53.15	0
c10229_g1_i1|m.6894	gi|91094943|ref|XP_967788.1| PREDICTED: 26S protease regulatory subunit 10B [Tribolium castaneum]	96.94	0
c1023_g1_i1|m.283	gi|642916264|ref|XP_008190954.1| PREDICTED: titin [Tribolium castaneum]	56.29	1e-47
c10230_g1_i1|m.6895	gi|91076434|ref|XP_971068.1| PREDICTED: U4/U6.U5 small nuclear ribonucleoprotein 27 kDa protein [Tribolium castaneum]	77.5	2e-40
c10232_g1_i2|m.6898	gi|189241537|ref|XP_970292.2| PREDICTED: tropomodulin isoform X2 [Tribolium castaneum]	82.81	0
c10234_g4_i1|m.6904	gi|642921594|ref|XP_008192439.1| PREDICTED: protein xmas-2 [Tribolium castaneum]	50.4	6e-108
c10235_g1_i1|m.6908	gi|91092584|ref|XP_969806.1| PREDICTED: F-box only protein 42 [Tribolium castaneum]	56.33	0
c10236_g1_i1|m.6909	gi|197276682|ref|NP_001127850.1| smoothened precursor [Tribolium castaneum]	61.71	0
c10237_g1_i1|m.6911	gi|91088253|ref|XP_966567.1| PREDICTED: ankyrin repeat and zinc finger domain-containing protein 1 [Tribolium castaneum]	50.62	0
c10238_g1_i2|m.6914	gi|91093829|ref|XP_969227.1| PREDICTED: transmembrane protein 161B [Tribolium castaneum]	67.21	0
c10239_g1_i1|m.6915	gi|642911140|ref|XP_008200597.1| PREDICTED: protein phosphatase 1 regulatory subunit SDS22 [Tribolium castaneum]	41.2	3e-80
c1024_g1_i1|m.284	gi|167466209|ref|NP_001034503.2| fork head [Tribolium castaneum]	76.43	0
c10241_g1_i2|m.6918	gi|91079326|ref|XP_968197.1| PREDICTED: folliculin [Tribolium castaneum]	57.03	3e-156
c10242_g1_i1|m.6919	gi|642939138|ref|XP_008201186.1| PREDICTED: SEC14-like protein 3, partial [Tribolium castaneum]	57.69	1e-175
c10243_g1_i1|m.6920	gi|642923789|ref|XP_008193884.1| PREDICTED: uncharacterized protein F13E6.1 [Tribolium castaneum]	80	1e-100
c10244_g1_i1|m.6921	gi|189236897|ref|XP_968053.2| PREDICTED: protein argonaute-3 [Tribolium castaneum]	51.11	0
c10245_g1_i1|m.6923	gi|642932484|ref|XP_008197133.1| PREDICTED: nucleoside diphosphate-linked moiety X motif 6 isoform X2 [Tribolium castaneum]	54.12	5e-99
c10246_g1_i3|m.6925	gi|642926951|ref|XP_008195075.1| PREDICTED: ion transport peptide isoform X3 [Tribolium castaneum]	63.56	7e-54
c10246_g1_i4|m.6926	gi|642926945|ref|XP_008195071.1| PREDICTED: ion transport peptide isoform X2 [Tribolium castaneum]	56.45	2e-46
c10247_g1_i1|m.6927	gi|91080821|ref|XP_966682.1| PREDICTED: uncharacterized protein LOC658984 [Tribolium castaneum]	45.45	5e-59
c10248_g2_i1|m.6931	gi|642913653|ref|XP_008201105.1| PREDICTED: mucin-2-like [Tribolium castaneum]	44.92	1e-43
c10251_g1_i2|m.6939	gi|642918114|ref|XP_008194055.1| PREDICTED: inactive peptidyl-prolyl cis-trans isomerase FKBP6 [Tribolium castaneum]	41.85	2e-90
c10252_g1_i1|m.6940	gi|91078180|ref|XP_967491.1| PREDICTED: beta-galactosidase-1-like protein 2 [Tribolium castaneum]	61.49	0
c10254_g1_i2|m.6944	gi|91085523|ref|XP_972076.1| PREDICTED: sphingolipid delta(4)-desaturase DES1 [Tribolium castaneum]	85	0
c10255_g1_i2|m.6948	gi|642936076|ref|XP_008198293.1| PREDICTED: telomerase-binding protein EST1A [Tribolium castaneum]	54.34	0
c10256_g1_i2|m.6950	gi|642920426|ref|XP_008192345.1| PREDICTED: MD-2-related lipid-recognition protein-like [Tribolium castaneum]	35.29	9e-28
c10257_g1_i2|m.6952	gi|642927268|ref|XP_008195200.1| PREDICTED: poly(A) RNA polymerase, mitochondrial [Tribolium castaneum]	57.72	0
c10258_g1_i2|m.6954	gi|91094273|ref|XP_970483.1| PREDICTED: ethylmalonyl-CoA decarboxylase [Tribolium castaneum]	48.33	2e-92
c10259_g1_i1|m.6955	gi|91083981|ref|XP_975187.1| PREDICTED: transcription factor HES-1-like [Tribolium castaneum]	65.31	7e-104
c10259_g1_i1|m.6956	gi|642924735|ref|XP_975179.2| PREDICTED: 10 kDa heat shock protein, mitochondrial [Tribolium castaneum]	72.73	3e-49
c10260_g2_i1|m.6959	gi|642932209|ref|XP_008194624.1| PREDICTED: serine/threonine-protein kinase Chk2 isoform X2 [Tribolium castaneum]	46.13	1e-91
c10261_g1_i2|m.6961	gi|642921168|ref|XP_008192743.1| PREDICTED: uncharacterized protein LOC103312839 [Tribolium castaneum]	43.54	1e-117
c10265_g1_i2|m.6965	gi|642935403|ref|XP_008197996.1| PREDICTED: tumor protein p63-regulated gene 1-like protein isoform X4 [Tribolium castaneum]	47.4	3e-63
c10265_g1_i3|m.6966	gi|91090546|ref|XP_971052.1| PREDICTED: tumor protein p63-regulated gene 1-like protein isoform X1 [Tribolium castaneum]	47.16	5e-76
c10266_g1_i1|m.6971	gi|642914541|ref|XP_008201720.1| PREDICTED: organic cation transporter protein [Tribolium castaneum]	61.37	0
c10267_g1_i1|m.6972	gi|91085713|ref|XP_972970.1| PREDICTED: cyclin-H [Tribolium castaneum]	79.57	0
c10268_g1_i7|m.6985	gi|642918746|ref|XP_008191567.1| PREDICTED: zinc finger matrin-type protein CG9776-like isoform X2 [Tribolium castaneum]	52.34	0
c10270_g1_i1|m.6986	gi|91091522|ref|XP_969887.1| PREDICTED: frataxin homolog, mitochondrial [Tribolium castaneum]	66.39	4e-55
c10271_g1_i1|m.6987	gi|91091602|ref|XP_975764.1| PREDICTED: cytoplasmic dynein 1 intermediate chain isoform X7 [Tribolium castaneum]	87.21	0
c10273_g1_i1|m.6991	gi|642912087|ref|XP_008200797.1| PREDICTED: uncharacterized protein LOC103315013 [Tribolium castaneum]	29.63	7e-96
c10275_g1_i1|m.6993	gi|642921796|ref|XP_008199323.1| PREDICTED: transcription initiation factor IIB [Tribolium castaneum]	95.87	0
c10276_g1_i1|m.6994	gi|91083639|ref|XP_970664.1| PREDICTED: synaptobrevin homolog YKT6 [Tribolium castaneum]	79.9	2e-121
c10278_g1_i1|m.7001	gi|91083931|ref|XP_974830.1| PREDICTED: N-acetylserotonin O-methyltransferase-like protein [Tribolium castaneum]	69.61	4e-99
c10282_g1_i2|m.7007	gi|642911313|ref|XP_008199366.1| PREDICTED: ubiquitin carboxyl-terminal hydrolase 8-like isoform X1 [Tribolium castaneum]	37.19	1e-152
c10283_g1_i1|m.7009	gi|642919809|ref|XP_008192077.1| PREDICTED: homeodomain-interacting protein kinase 2 isoform X2 [Tribolium castaneum]	81.89	0
c10284_g1_i1|m.7011	gi|642925121|ref|XP_008194176.1| PREDICTED: YTH domain-containing family protein 3 isoform X1 [Tribolium castaneum]	81.51	0
c10285_g1_i1|m.7015	gi|91094429|ref|XP_969518.1| PREDICTED: M-phase inducer phosphatase [Tribolium castaneum]	55.51	2e-144
c10287_g1_i2|m.7018	gi|91076154|ref|XP_970766.1| PREDICTED: venom protease [Tribolium castaneum]	53.41	2e-140
c10289_g1_i1|m.7019	gi|189240413|ref|XP_969795.2| PREDICTED: forkhead box protein K1 [Tribolium castaneum]	78.57	0
c1029_g1_i1|m.285	gi|91087313|ref|XP_975577.1| PREDICTED: copper chaperone for superoxide dismutase [Tribolium castaneum]	54.59	2e-82
c10291_g1_i1|m.7020	gi|91082329|ref|XP_974627.1| PREDICTED: mannose-P-dolichol utilization defect 1 protein homolog [Tribolium castaneum]	65.25	1e-103
c10292_g1_i1|m.7021	gi|642940301|ref|XP_008200532.1| PREDICTED: uncharacterized protein LOC103314954, partial [Tribolium castaneum]	54.44	2e-62
c10293_g1_i1|m.7023	gi|642934818|ref|XP_008197823.1| PREDICTED: protein phosphatase 1 regulatory subunit 14B [Tribolium castaneum]	80.54	8e-77
c10294_g1_i3|m.7027	gi|642936081|ref|XP_008198295.1| PREDICTED: FAD synthase-like [Tribolium castaneum]	57.14	3e-99
c10295_g1_i1|m.7028	gi|642912716|ref|XP_008200973.1| PREDICTED: uncharacterized protein LOC103315050 [Tribolium castaneum]	46.27	2e-59
c10297_g1_i1|m.7029	gi|642934652|ref|XP_008197752.1| PREDICTED: kelch-like protein 26 isoform X1 [Tribolium castaneum]	58.17	0
c10299_g1_i1|m.7031	gi|91091456|ref|XP_972862.1| PREDICTED: aquaporin AQPcic [Tribolium castaneum]	64.32	2e-112
c10300_g1_i2|m.7034	gi|642934845|ref|XP_008197834.1| PREDICTED: E3 ubiquitin-protein ligase RNF185 [Tribolium castaneum]	76.19	7e-99
c10302_g1_i1|m.7035	gi|642918274|ref|XP_008191440.1| PREDICTED: purine nucleoside phosphorylase isoform X1 [Tribolium castaneum]	71.92	1e-166
c10302_g1_i2|m.7036	gi|91079867|ref|XP_967070.1| PREDICTED: purine nucleoside phosphorylase isoform X2 [Tribolium castaneum]	71.68	1e-161
c10304_g1_i1|m.7037	gi|642936266|ref|XP_008198375.1| PREDICTED: retinol dehydrogenase 11-like [Tribolium castaneum]	48.41	8e-94
c10305_g1_i1|m.7039	gi|288869508|ref|NP_001165861.1| ribosomal protein S6 [Tribolium castaneum]	87.3	2e-149
c10306_g1_i4|m.7044	gi|91080629|ref|XP_974349.1| PREDICTED: tetraspanin-9 [Tribolium castaneum]	72.31	2e-140
c10308_g1_i1|m.7046	gi|642917499|ref|XP_008191227.1| PREDICTED: myosin-2 heavy chain-like isoform X2 [Tribolium castaneum]	41.43	8e-112
c10309_g1_i1|m.7048	gi|642921130|ref|XP_975383.3| PREDICTED: glutaredoxin-related protein 5, mitochondrial [Tribolium castaneum]	70.42	5e-72
c10310_g1_i1|m.7049	gi|91078694|ref|XP_971269.1| PREDICTED: mitochondrial inner membrane protease ATP23 homolog [Tribolium castaneum]	66.41	2e-127
c10311_g1_i1|m.7050	gi|642927669|ref|XP_008195357.1| PREDICTED: high mobility group protein 20A [Tribolium castaneum]	71.01	1e-134
c10312_g1_i1|m.7051	gi|91091950|ref|XP_967959.1| PREDICTED: V-type proton ATPase 16 kDa proteolipid subunit [Tribolium castaneum]	90.38	2e-92
c10314_g1_i1|m.7055	gi|642922166|ref|XP_008193043.1| PREDICTED: uncharacterized protein LOC103312926 [Tribolium castaneum]	39.49	4e-34
c10315_g1_i1|m.7056	gi|91088433|ref|XP_967839.1| PREDICTED: BTB/POZ domain-containing protein KCTD5 [Tribolium castaneum]	87.68	1e-140
c10317_g1_i1|m.7059	gi|91085595|ref|XP_968904.1| PREDICTED: phosphatidylinositol-glycan biosynthesis class F protein [Tribolium castaneum]	45.41	1e-45
c10319_g1_i1|m.7061	gi|642929084|ref|XP_008195684.1| PREDICTED: glutamate--cysteine ligase regulatory subunit [Tribolium castaneum]	52.61	2e-92
c10321_g1_i1|m.7065	gi|642932406|ref|XP_008197097.1| PREDICTED: UPF0472 protein C16orf72 homolog isoform X3 [Tribolium castaneum]	70.64	6e-116
c10322_g1_i1|m.7066	gi|91077030|ref|XP_967400.1| PREDICTED: poly(ADP-ribose) glycohydrolase [Tribolium castaneum]	59.05	0
c10323_g1_i3|m.7069	gi|642928718|ref|XP_008199753.1| PREDICTED: fatty acid 2-hydroxylase isoform X1 [Tribolium castaneum]	62.89	3e-149
c10324_g1_i1|m.7070	gi|189238242|ref|XP_973033.2| PREDICTED: uncharacterized protein LOC661801 [Tribolium castaneum]	63.61	2e-133
c10325_g1_i1|m.7071	gi|91091622|ref|XP_969824.1| PREDICTED: waprin-Rha1 [Tribolium castaneum]	46.62	1e-33
c10326_g1_i1|m.7072	gi|642912808|ref|XP_008201260.1| PREDICTED: neurogenic protein mastermind-like, partial [Tribolium castaneum]	78.65	0
c10327_g1_i1|m.7073	gi|642911817|ref|XP_008200757.1| PREDICTED: histone-arginine methyltransferase CARMER isoform X1 [Tribolium castaneum]	81.32	0
c10328_g1_i1|m.7075	gi|642917579|ref|XP_008191265.1| PREDICTED: excitatory amino acid transporter 3-like [Tribolium castaneum]	57.66	0
c10329_g2_i2|m.7081	gi|189237968|ref|XP_001811946.1| PREDICTED: TBC1 domain family member 25 isoform X1 [Tribolium castaneum]	67.01	0
c10331_g1_i1|m.7082	gi|91076006|ref|XP_966406.1| PREDICTED: very long-chain specific acyl-CoA dehydrogenase, mitochondrial [Tribolium castaneum]	65.65	0
c10333_g1_i2|m.7088	gi|642926756|ref|XP_008195000.1| PREDICTED: DNA polymerase beta-like [Tribolium castaneum]	66.87	9e-162
c10334_g1_i1|m.7089	gi|91090888|ref|XP_973381.1| PREDICTED: YEATS domain-containing protein 4 [Tribolium castaneum]	88.55	2e-152
c10335_g2_i1|m.7090	gi|91091000|ref|XP_974944.1| PREDICTED: copper homeostasis protein cutC homolog [Tribolium castaneum]	66.25	4e-108
c10336_g1_i1|m.7091	gi|642920999|ref|XP_008192646.1| PREDICTED: uncharacterized protein LOC663563 isoform X2 [Tribolium castaneum]	86.89	1e-131
c10337_g1_i1|m.7096	gi|91093869|ref|XP_967782.1| PREDICTED: cytoplasmic FMR1-interacting protein [Tribolium castaneum]	94.02	0
c10338_g1_i2|m.7103	gi|642939198|ref|XP_008200377.1| PREDICTED: neuroglian isoform X3 [Tribolium castaneum]	66.64	0
c10340_g1_i1|m.7105	gi|642923817|ref|XP_001816010.2| PREDICTED: ubiquitin carboxyl-terminal hydrolase CYLD [Tribolium castaneum]	60.45	0
c10341_g1_i1|m.7106	gi|91083833|ref|XP_973697.1| PREDICTED: endocuticle structural glycoprotein SgAbd-8 [Tribolium castaneum]	63.16	2e-75
c10347_g1_i2|m.7111	gi|91090808|ref|XP_970814.1| PREDICTED: tRNA (guanine-N(7)-)-methyltransferase isoform X1 [Tribolium castaneum]	78.48	2e-143
c10348_g1_i1|m.7112	gi|642918781|ref|XP_008191582.1| PREDICTED: inositol-tetrakisphosphate 1-kinase [Tribolium castaneum]	56.96	5e-130
c10349_g1_i1|m.7113	gi|642921101|ref|XP_975194.2| PREDICTED: something about silencing protein 10 [Tribolium castaneum]	58.08	7e-154
c1035_g1_i1|m.289	gi|160420293|ref|NP_001104012.1| chitin deacetylase 7 precursor [Tribolium castaneum]	43.58	4e-111
c10350_g1_i1|m.7114	gi|642933845|ref|XP_008197533.1| PREDICTED: ATP-binding cassette sub-family D member 3 [Tribolium castaneum]	73.86	0
c10352_g1_i3|m.7118	gi|189234163|ref|XP_967233.2| PREDICTED: receptor expression-enhancing protein 4-like [Tribolium castaneum]	49.56	1e-114
c10354_g1_i1|m.7121	gi|91095155|ref|XP_967790.1| PREDICTED: rRNA-processing protein UTP23 homolog [Tribolium castaneum]	57.92	3e-79
c10355_g1_i1|m.7123	gi|642937766|ref|XP_008198936.1| PREDICTED: beta-centractin [Tribolium castaneum]	91.19	0
c10358_g1_i1|m.7129	gi|642934762|ref|XP_967447.2| PREDICTED: BTB/POZ domain-containing adapter for CUL3-mediated RhoA degradation protein 3 isoform X2 [Tribolium castaneum]	90.14	0
c10359_g1_i2|m.7133	gi|642912009|ref|XP_008199058.1| PREDICTED: rho guanine nucleotide exchange factor 17 isoform X1 [Tribolium castaneum]	65.29	0
c1036_g1_i1|m.290	gi|642920067|ref|XP_008192192.1| PREDICTED: nuclear RNA export factor 2-like [Tribolium castaneum]	50.28	0
c10360_g1_i1|m.7136	gi|91093509|ref|XP_969295.1| PREDICTED: ras-related protein Rab-39B [Tribolium castaneum]	92.2	3e-154
c10362_g1_i2|m.7139	gi|91080553|ref|XP_976040.1| PREDICTED: clathrin light chain isoform X2 [Tribolium castaneum]	68.6	3e-78
c10362_g1_i2|m.7140	gi|642919408|ref|XP_008191857.1| PREDICTED: dnaJ homolog subfamily C member 24 [Tribolium castaneum]	42.97	2e-32
c10365_g1_i1|m.7148	gi|91077770|ref|XP_968734.1| PREDICTED: phospholipase B1, membrane-associated [Tribolium castaneum]	45.98	7e-126
c10366_g1_i1|m.7150	gi|642931828|ref|XP_971231.2| PREDICTED: F-box/LRR-repeat protein 4 [Tribolium castaneum]	55.13	0
c10367_g1_i2|m.7152	gi|642927954|ref|XP_008195460.1| PREDICTED: protein pellino isoform X2 [Tribolium castaneum]	85.06	0
c10369_g1_i2|m.7156	gi|91090914|ref|XP_974006.1| PREDICTED: NCK-interacting protein with SH3 domain [Tribolium castaneum]	61.34	5e-175
c10370_g1_i1|m.7158	gi|91085045|ref|XP_974357.1| PREDICTED: UV excision repair protein RAD23 homolog B [Tribolium castaneum]	62.97	9e-140
c10374_g1_i1|m.7163	gi|642912544|ref|XP_008200907.1| PREDICTED: zinc finger protein 708-like [Tribolium castaneum]	49.66	7e-174
c10375_g1_i1|m.7164	gi|91094259|ref|XP_969448.1| PREDICTED: xylosyltransferase oxt [Tribolium castaneum]	56.04	0
c10376_g1_i1|m.7165	gi|642918422|ref|XP_008191466.1| PREDICTED: BTB/POZ domain-containing protein 10 [Tribolium castaneum]	77.95	0
c10377_g1_i1|m.7169	gi|642928990|ref|XP_972721.2| PREDICTED: ATP synthase subunit gamma, mitochondrial [Tribolium castaneum]	74.32	2e-158
c10378_g1_i1|m.7170	gi|91086063|ref|XP_973944.1| PREDICTED: uncharacterized protein LOC662774 [Tribolium castaneum]	32.58	3e-43
c10379_g1_i1|m.7171	gi|91092208|ref|XP_969730.1| PREDICTED: protein unc-50 homolog [Tribolium castaneum]	76.21	9e-142
c10380_g1_i1|m.7172	gi|642917173|ref|XP_008191149.1| PREDICTED: pangolin isoform X1 [Tribolium castaneum]	86.96	0
c10380_g1_i2|m.7174	gi|642917177|ref|XP_008191151.1| PREDICTED: pangolin isoform X3 [Tribolium castaneum]	88.6	0
c10381_g1_i1|m.7176	gi|91095161|ref|XP_968028.1| PREDICTED: elongator complex protein 3 [Tribolium castaneum]	82.83	0
c10383_g1_i1|m.7178	gi|642910507|ref|XP_008200244.1| PREDICTED: uncharacterized protein LOC660017 [Tribolium castaneum]	66.26	2e-164
c10386_g1_i1|m.7182	gi|642910781|ref|XP_008193407.1| PREDICTED: peptidoglycan-recognition protein SC2-like [Tribolium castaneum]	52.46	2e-67
c10389_g1_i1|m.7183	gi|642911196|ref|XP_008199563.1| PREDICTED: solute carrier family 12 member 4 isoform X1 [Tribolium castaneum]	81.12	0
c10390_g1_i1|m.7190	gi|642938853|ref|XP_008200091.1| PREDICTED: armadillo repeat-containing protein 2, partial [Tribolium castaneum]	64.45	0
c10391_g1_i1|m.7192	gi|91079302|ref|XP_966978.1| PREDICTED: serine/threonine-protein kinase RIO2 [Tribolium castaneum]	68.9	0
c10392_g1_i1|m.7193	gi|149588788|ref|NP_001092299.1| tyrosine hydroxylase [Tribolium castaneum]	83.09	0
c10394_g1_i1|m.7195	gi|642935364|ref|XP_008197982.1| PREDICTED: palmitoyltransferase ZDHHC23 [Tribolium castaneum]	47.55	2e-88
c10395_g1_i1|m.7197	gi|642916733|ref|XP_008192400.1| PREDICTED: homeobox protein araucan isoform X1 [Tribolium castaneum]	76.14	0
c10395_g1_i2|m.7198	gi|642916737|ref|XP_008192408.1| PREDICTED: homeobox protein araucan isoform X3 [Tribolium castaneum]	84.16	0
c10396_g1_i2|m.7200	gi|91088343|ref|XP_971105.1| PREDICTED: L-xylulose reductase [Tribolium castaneum]	64.61	2e-114
c10397_g1_i1|m.7201	gi|91077736|ref|XP_975147.1| PREDICTED: leucine-rich repeat and immunoglobulin-like domain-containing nogo receptor-interacting protein 1-B [Tribolium castaneum]	40.26	3e-108
c1040_g1_i1|m.292	gi|642936067|ref|XP_008198289.1| PREDICTED: 60S ribosomal protein L23a-like [Tribolium castaneum]	79.64	6e-84
c10401_g1_i2|m.7208	gi|642937444|ref|XP_008198837.1| PREDICTED: ribulose-phosphate 3-epimerase [Tribolium castaneum]	83.93	2e-142
c10402_g1_i1|m.7209	gi|642938616|ref|XP_008199867.1| PREDICTED: epidermal growth factor receptor kinase substrate 8 [Tribolium castaneum]	69.95	0
c10403_g1_i1|m.7214	gi|189234028|ref|XP_973216.2| PREDICTED: dual specificity mitogen-activated protein kinase kinase dSOR1 [Tribolium castaneum]	85.45	0
c10404_g1_i1|m.7215	gi|91077062|ref|XP_968655.1| PREDICTED: proteasome subunit alpha type-6 [Tribolium castaneum]	89.43	1e-156
c10405_g1_i1|m.7216	gi|91092178|ref|XP_968474.1| PREDICTED: ras-related protein Rap-2c [Tribolium castaneum]	95.58	8e-120
c10406_g1_i2|m.7219	gi|642937828|ref|XP_008200318.1| PREDICTED: ethanolamine kinase 2 [Tribolium castaneum]	50.87	9e-126
c10407_g1_i1|m.7222	gi|189235365|ref|XP_967323.2| PREDICTED: organic cation transporter protein [Tribolium castaneum]	68.05	0
c10408_g1_i1|m.7228	gi|642928295|ref|XP_008195522.1| PREDICTED: calponin homology domain-containing protein DDB_G0272472-like [Tribolium castaneum]	62.75	7e-13
c10409_g1_i2|m.7230	gi|91083233|ref|XP_973728.1| PREDICTED: dolichyldiphosphatase 1 [Tribolium castaneum]	80.16	6e-145
c10410_g1_i1|m.7231	gi|642928435|ref|XP_008193784.1| PREDICTED: DNA-directed RNA polymerases I and III subunit RPAC1 [Tribolium castaneum]	75.89	0
c10411_g1_i1|m.7232	gi|91090266|ref|XP_970337.1| PREDICTED: selenoprotein M [Tribolium castaneum]	44.79	1e-23
c10412_g1_i1|m.7233	gi|189238828|ref|XP_969342.2| PREDICTED: peptidyl-alpha-hydroxyglycine alpha-amidating lyase 2 isoform X1 [Tribolium castaneum]	55.7	8e-147
c10414_g1_i1|m.7235	gi|642916151|ref|XP_008190906.1| PREDICTED: MKL/myocardin-like protein 2 isoform X2 [Tribolium castaneum]	69.61	0
c10415_g1_i1|m.7237	gi|642914539|ref|XP_008201719.1| PREDICTED: uncharacterized protein LOC659370 [Tribolium castaneum]	67.12	0
c10416_g1_i1|m.7238	gi|189241987|ref|XP_001808435.1| PREDICTED: ADP-ribosylation factor 2 isoform X1 [Tribolium castaneum]	94.41	4e-123
c10418_g1_i2|m.7241	gi|91086175|ref|XP_970802.1| PREDICTED: L-asparaginase isoform X1 [Tribolium castaneum]	57.22	1e-146
c10420_g1_i1|m.7244	gi|189234428|ref|XP_001816488.1| PREDICTED: coatomer subunit beta [Tribolium castaneum]	85.27	0
c10422_g2_i1|m.7246	gi|91091390|ref|XP_973483.1| PREDICTED: gametogenetin-binding protein 2-like [Tribolium castaneum]	61.17	0
c10423_g1_i1|m.7247	gi|642921269|ref|XP_008192793.1| PREDICTED: eukaryotic translation initiation factor 4 gamma 2 [Tribolium castaneum]	68.8	0
c10424_g1_i1|m.7249	gi|91091180|ref|XP_971767.1| PREDICTED: uncharacterized protein LOC660444 [Tribolium castaneum]	78.67	6e-132
c10426_g1_i1|m.7252	gi|91085945|ref|XP_970923.1| PREDICTED: MRG/MORF4L-binding protein [Tribolium castaneum]	53.18	2e-56
c10429_g1_i4|m.7263	gi|642935515|ref|XP_008198041.1| PREDICTED: CTD nuclear envelope phosphatase 1 homolog isoform X3 [Tribolium castaneum]	92.18	2e-169
c10431_g1_i1|m.7265	gi|642919573|ref|XP_001815717.2| PREDICTED: zinc finger protein 433 [Tribolium castaneum]	41.29	2e-94
c10432_g1_i1|m.7266	gi|189240524|ref|XP_971875.2| PREDICTED: 60S ribosomal protein L3 [Tribolium castaneum]	91.71	0
c10434_g1_i1|m.7270	gi|189235467|ref|XP_001814003.1| PREDICTED: chymotrypsin-1 [Tribolium castaneum]	44.88	6e-73
c10436_g1_i1|m.7271	gi|642921494|ref|XP_968130.3| PREDICTED: uncharacterized protein LOC656511 [Tribolium castaneum]	56.16	5e-176
c10437_g1_i1|m.7272	gi|642931867|ref|XP_008196761.1| PREDICTED: 46 kDa FK506-binding nuclear protein [Tribolium castaneum]	55.48	6e-40
c10438_g1_i2|m.7274	gi|91086963|ref|XP_973116.1| PREDICTED: protein SOX-15-like isoform X1 [Tribolium castaneum]	59.47	7e-111
c10441_g2_i1|m.7275	gi|642922377|ref|XP_008193132.1| PREDICTED: insulin-like growth factor 2 mRNA-binding protein 1 isoform X4 [Tribolium castaneum]	88.42	0
c10441_g2_i2|m.7276	gi|642922371|ref|XP_008193129.1| PREDICTED: insulin-like growth factor 2 mRNA-binding protein 1 isoform X1 [Tribolium castaneum]	86.12	0
c10442_g1_i1|m.7277	gi|91079909|ref|XP_966719.1| PREDICTED: integrin-linked protein kinase isoform X1 [Tribolium castaneum]	83.04	0
c10443_g1_i1|m.7278	gi|91083743|ref|XP_971153.1| PREDICTED: tyrosine--tRNA ligase, cytoplasmic [Tribolium castaneum]	74.42	0
c10445_g1_i1|m.7281	gi|91082291|ref|XP_973881.1| PREDICTED: probable tRNA pseudouridine synthase 2 [Tribolium castaneum]	59.21	5e-134
c10446_g1_i1|m.7283	gi|642911645|ref|XP_008200684.1| PREDICTED: synapse-associated protein of 47 kDa isoform X1 [Tribolium castaneum]	66.91	0
c10447_g1_i1|m.7285	gi|642930249|ref|XP_008196316.1| PREDICTED: RNA 3'-terminal phosphate cyclase [Tribolium castaneum]	63.69	7e-166
c10448_g1_i2|m.7288	gi|642910313|ref|XP_969816.2| PREDICTED: alanine--glyoxylate aminotransferase 2, mitochondrial [Tribolium castaneum]	64.35	0
c1045_g1_i1|m.297	gi|91090105|ref|XP_970875.1| PREDICTED: 60S ribosomal protein L10 [Tribolium castaneum]	92.24	2e-152
c10450_g1_i2|m.7294	gi|91094023|ref|XP_967468.1| PREDICTED: protein BTG1-like [Tribolium castaneum]	57.81	4e-74
c10451_g1_i1|m.7295	gi|642918268|ref|XP_008191439.1| PREDICTED: methoprene-tolerant isoform X1 [Tribolium castaneum]	67.92	0
c10451_g1_i3|m.7297	gi|150170685|ref|NP_001092812.1| methoprene-tolerant [Tribolium castaneum]	70.77	0
c10452_g1_i1|m.7298	gi|642933345|ref|XP_008197376.1| PREDICTED: charged multivesicular body protein 6-B isoform X2 [Tribolium castaneum]	68.37	4e-85
c10453_g2_i1|m.7303	gi|642938921|ref|XP_008195601.1| PREDICTED: PHD finger protein rhinoceros [Tribolium castaneum]	64.48	0
c10454_g1_i1|m.7306	gi|642925988|ref|XP_008194720.1| PREDICTED: gamma-secretase subunit pen-2 [Tribolium castaneum]	69.31	2e-51
c10455_g1_i1|m.7307	gi|642939330|ref|XP_008200407.1| PREDICTED: src substrate cortactin-like, partial [Tribolium castaneum]	83.55	9e-87
c10456_g1_i1|m.7310	gi|642929542|ref|XP_008195879.1| PREDICTED: exosome complex component RRP41 [Tribolium castaneum]	85.43	6e-165
c10457_g1_i1|m.7311	gi|91086631|ref|XP_966390.1| PREDICTED: abhydrolase domain-containing protein 2 [Tribolium castaneum]	80.1	0
c10458_g1_i1|m.7312	gi|642918990|ref|XP_008191687.1| PREDICTED: tyrosine-protein kinase Btk29A isoform X1 [Tribolium castaneum]	78.8	0
c10458_g1_i3|m.7314	gi|642918994|ref|XP_008191690.1| PREDICTED: tyrosine-protein kinase Btk29A isoform X3 [Tribolium castaneum]	88.25	0
c10459_g1_i1|m.7315	gi|642912791|ref|XP_008201254.1| PREDICTED: max-interacting protein 1-like [Tribolium castaneum]	84.11	3e-68
c10460_g1_i1|m.7316	gi|642923339|ref|XP_008193708.1| PREDICTED: rab3 GTPase-activating protein catalytic subunit [Tribolium castaneum]	58.49	0
c10462_g1_i1|m.7318	gi|91077944|ref|XP_966624.1| PREDICTED: U3 small nucleolar RNA-associated protein 18 homolog [Tribolium castaneum]	58.55	0
c10464_g1_i1|m.7320	gi|282165772|ref|NP_001164127.1| Jun-related antigen [Tribolium castaneum]	62.61	6e-80
c10465_g1_i1|m.7321	gi|91086103|ref|XP_967597.1| PREDICTED: actin-related protein 5 [Tribolium castaneum]	71.1	0
c10466_g2_i2|m.7323	gi|91076680|ref|XP_971073.1| PREDICTED: AP-1 complex subunit sigma-2 isoform X1 [Tribolium castaneum]	97.45	5e-111
c10468_g1_i1|m.7326	gi|189235630|ref|XP_970015.2| PREDICTED: protein extra-macrochaetae [Tribolium castaneum]	74.1	2e-69
c10470_g1_i1|m.7328	gi|642932262|ref|XP_008197037.1| PREDICTED: exosome complex exonuclease RRP44 [Tribolium castaneum]	72.9	0
c10473_g1_i1|m.7333	gi|91080987|ref|XP_974999.1| PREDICTED: WD repeat-containing protein 48 homolog [Tribolium castaneum]	85.05	0
c10475_g2_i1|m.7337	gi|91090488|ref|XP_968919.1| PREDICTED: inactive pancreatic lipase-related protein 1 isoform X2 [Tribolium castaneum]	61.02	3e-146
c10476_g1_i1|m.7338	gi|91076494|ref|XP_972946.1| PREDICTED: protein CREG1 [Tribolium castaneum]	55.31	5e-77
c10477_g1_i1|m.7339	gi|91080113|ref|XP_967415.1| PREDICTED: eukaryotic translation initiation factor 3 subunit I [Tribolium castaneum]	78.22	0
c10479_g1_i3|m.7345	gi|642931544|ref|XP_008196630.1| PREDICTED: uncharacterized protein LOC658447 [Tribolium castaneum]	61.86	2e-44
c10480_g1_i2|m.7349	gi|642930686|ref|XP_008199987.1| PREDICTED: probable GPI-anchored adhesin-like protein PGA55 [Tribolium castaneum]	52.42	0
c10481_g1_i1|m.7355	gi|642937921|ref|XP_008199131.1| PREDICTED: synapsin, partial [Tribolium castaneum]	90.98	1e-78
c10482_g1_i1|m.7358	gi|189241116|ref|XP_972728.2| PREDICTED: aromatic-L-amino-acid decarboxylase-like [Tribolium castaneum]	72.81	0
c10483_g1_i1|m.7359	gi|642915242|ref|XP_008190538.1| PREDICTED: uncharacterized protein LOC103312214 [Tribolium castaneum]	43.55	0
c10484_g1_i1|m.7360	gi|91076690|ref|XP_971724.1| PREDICTED: NADH dehydrogenase [ubiquinone] 1 alpha subcomplex assembly factor 5 [Tribolium castaneum]	79.87	0
c10486_g1_i1|m.7367	gi|91083729|ref|XP_970665.1| PREDICTED: Y+L amino acid transporter 2 [Tribolium castaneum]	78.35	0
c10488_g1_i3|m.7375	gi|642914995|ref|XP_008190475.1| PREDICTED: heterogeneous nuclear ribonucleoprotein Q-like isoform X3 [Tribolium castaneum]	89.94	0
c10490_g1_i1|m.7378	gi|642923111|ref|XP_008193614.1| PREDICTED: dnaJ homolog subfamily C member 11 isoform X1 [Tribolium castaneum]	73.23	0
c10491_g1_i1|m.7379	gi|189237377|ref|XP_971339.2| PREDICTED: X-linked interleukin-1 receptor accessory protein-like 2 [Tribolium castaneum]	55.82	0
c10492_g1_i1|m.7380	gi|91090774|ref|XP_969574.1| PREDICTED: sterol O-acyltransferase 1 [Tribolium castaneum]	41.89	4e-121
c10493_g1_i1|m.7381	gi|91076134|ref|XP_970027.1| PREDICTED: uncharacterized protein LOC658556 [Tribolium castaneum]	69.23	5e-86
c10495_g1_i1|m.7384	gi|189234617|ref|XP_975233.2| PREDICTED: U1 small nuclear ribonucleoprotein C [Tribolium castaneum]	92.55	2e-58
c10496_g1_i1|m.7385	gi|642913701|ref|XP_008201126.1| PREDICTED: lysophospholipid acyltransferase 1 [Tribolium castaneum]	64.96	0
c10499_g1_i1|m.7386	gi|91077048|ref|XP_968190.1| PREDICTED: coiled-coil domain-containing protein 58 [Tribolium castaneum]	62.31	2e-58
c10499_g1_i1|m.7387	gi|642912642|ref|XP_008200946.1| PREDICTED: UPF0389 protein CG9231 [Tribolium castaneum]	45.92	2e-30
c10502_g1_i1|m.7394	gi|91078954|ref|XP_974170.1| PREDICTED: negative elongation factor B [Tribolium castaneum]	88.03	0
c10503_g1_i1|m.7395	gi|91078316|ref|XP_972782.1| PREDICTED: probable methyltransferase BTM2 homolog [Tribolium castaneum]	51.39	3e-104
c10504_g1_i1|m.7396	gi|91082925|ref|XP_972790.1| PREDICTED: mitochondrial import inner membrane translocase subunit Tim21 [Tribolium castaneum]	66.5	5e-86
c10505_g1_i1|m.7397	gi|91081711|ref|XP_971334.1| PREDICTED: transmembrane protein 165 [Tribolium castaneum]	77.44	4e-140
c10506_g1_i1|m.7399	gi|91087219|ref|XP_975481.1| PREDICTED: pinin [Tribolium castaneum]	77.36	4e-144
c10507_g1_i1|m.7400	gi|91088337|ref|XP_970871.1| PREDICTED: UPF0554 protein C2orf43 homolog [Tribolium castaneum]	48.16	2e-101
c10508_g1_i1|m.7401	gi|91077864|ref|XP_972466.1| PREDICTED: glutaredoxin-3 [Tribolium castaneum]	63.26	2e-100
c10509_g1_i1|m.7402	gi|642912820|ref|XP_008201266.1| PREDICTED: DNA damage-regulated autophagy modulator protein 2-like [Tribolium castaneum]	46.52	1e-68
c10511_g1_i1|m.7404	gi|642938614|ref|XP_008199866.1| PREDICTED: WAS protein family homolog 1 [Tribolium castaneum]	47.71	2e-123
c10512_g1_i1|m.7405	gi|642921581|ref|XP_008192432.1| PREDICTED: MOB kinase activator-like 2 [Tribolium castaneum]	79.42	2e-140
c10513_g1_i1|m.7408	gi|91076502|ref|XP_973137.1| PREDICTED: uncharacterized protein LOC661914 [Tribolium castaneum]	39.62	4e-54
c10517_g1_i1|m.7413	gi|91078956|ref|XP_974192.1| PREDICTED: protein prune homolog [Tribolium castaneum]	40.11	6e-82
c10518_g1_i1|m.7414	gi|642919367|ref|XP_008191842.1| PREDICTED: transmembrane protein 87A [Tribolium castaneum]	69.74	0
c10520_g1_i4|m.7418	gi|91080603|ref|XP_974067.1| PREDICTED: RING finger protein 141 [Tribolium castaneum]	55.14	2e-84
c10521_g1_i1|m.7419	gi|642912421|ref|XP_008193352.1| PREDICTED: serine protease snake-like [Tribolium castaneum]	42.93	8e-98
c10522_g1_i1|m.7420	gi|642919964|ref|XP_008192146.1| PREDICTED: DNA repair protein XRCC1 isoform X1 [Tribolium castaneum]	50.99	0
c10526_g1_i1|m.7423	gi|642934982|ref|XP_008199896.1| PREDICTED: protein Skeletor, isoforms B/C [Tribolium castaneum]	70.38	0
c10527_g1_i2|m.7424	gi|91078400|ref|XP_974453.1| PREDICTED: FAD-linked sulfhydryl oxidase ALR [Tribolium castaneum]	60.74	2e-70
c10528_g1_i2|m.7426	gi|642920414|ref|XP_008192338.1| PREDICTED: DNA-directed RNA polymerase I subunit rpa1 isoform X1 [Tribolium castaneum]	46.45	1e-59
c10529_g1_i1|m.7430	gi|642918838|ref|XP_008191608.1| PREDICTED: breast carcinoma-amplified sequence 3 homolog isoform X1 [Tribolium castaneum]	53.57	0
c10531_g1_i1|m.7437	gi|91080239|ref|XP_972955.1| PREDICTED: TNF receptor-associated factor 6 [Tribolium castaneum]	70.18	0
c10532_g1_i1|m.7438	gi|189238404|ref|XP_001812043.1| PREDICTED: uncharacterized protein LOC100142307 [Tribolium castaneum]	51.25	3e-126
c10533_g1_i1|m.7440	gi|642931239|ref|XP_971757.2| PREDICTED: enoyl-CoA hydratase, mitochondrial [Tribolium castaneum]	71.57	2e-153
c10534_g1_i1|m.7441	gi|642916858|ref|XP_008199531.1| PREDICTED: uncharacterized protein LOC103314688 [Tribolium castaneum]	31.84	3e-32
c10536_g1_i1|m.7443	gi|642921717|ref|XP_008199299.1| PREDICTED: ubiquitin-like-conjugating enzyme ATG3 [Tribolium castaneum]	83.54	0
c10537_g1_i1|m.7444	gi|642927610|ref|XP_008195334.1| PREDICTED: conserved oligomeric Golgi complex subunit 1 [Tribolium castaneum]	51.64	0
c10538_g1_i1|m.7445	gi|91082177|ref|XP_971147.1| PREDICTED: transmembrane protein 35 [Tribolium castaneum]	87.58	1e-92
c10539_g1_i1|m.7446	gi|91084211|ref|XP_968214.1| PREDICTED: transcriptional adapter 3 [Tribolium castaneum]	54.86	2e-111
c1054_g1_i1|m.302	gi|642917440|ref|XP_008191200.1| PREDICTED: jerky protein homolog-like [Tribolium castaneum]	26.79	4e-22
c10540_g1_i2|m.7449	gi|91076508|ref|XP_973251.1| PREDICTED: ras-related protein Rab-11A [Tribolium castaneum]	94.42	4e-153
c10541_g1_i1|m.7450	gi|642931789|ref|XP_008196729.1| PREDICTED: chromatin accessibility complex protein 1 [Tribolium castaneum]	51.76	1e-27
c10544_g1_i1|m.7456	gi|642923061|ref|XP_008200515.1| PREDICTED: sphingomyelin synthase-related 1-like [Tribolium castaneum]	71.46	0
c10545_g1_i1|m.7457	gi|189235087|ref|XP_001808767.1| PREDICTED: leucine-rich repeat-containing protein 16A [Tribolium castaneum]	71.38	0
c10548_g1_i1|m.7462	gi|91077788|ref|XP_969244.1| PREDICTED: potassium channel subfamily K member 6-like isoform X2 [Tribolium castaneum]	70.19	8e-150
c10549_g2_i1|m.7464	gi|642926278|ref|XP_008194857.1| PREDICTED: carbohydrate sulfotransferase 11 [Tribolium castaneum]	57.24	3e-51
c10550_g1_i1|m.7465	gi|91080023|ref|XP_972063.1| PREDICTED: beta-1,3-glucan-binding protein isoform X1 [Tribolium castaneum]	47.62	2e-159
c10552_g1_i1|m.7467	gi|189236107|ref|XP_973934.2| PREDICTED: high mobility group protein DSP1-like [Tribolium castaneum]	90.7	2e-110
c10553_g1_i1|m.7468	gi|91085981|ref|XP_971976.1| PREDICTED: cullin-1 [Tribolium castaneum]	89.21	0
c10554_g1_i3|m.7471	gi|642940052|ref|XP_008200969.1| PREDICTED: ATPase family AAA domain-containing protein 2-like isoform X1 [Tribolium castaneum]	62.35	0
c10555_g1_i1|m.7472	gi|91089961|ref|XP_973612.1| PREDICTED: beta-1,4-galactosyltransferase 7 [Tribolium castaneum]	69.44	3e-156
c10556_g1_i1|m.7473	gi|91082137|ref|XP_966595.1| PREDICTED: arrestin homolog [Tribolium castaneum]	81.38	0
c10559_g1_i4|m.7481	gi|642929804|ref|XP_975581.3| PREDICTED: phosphatidate phosphatase LPIN3 [Tribolium castaneum]	63.44	0
c10566_g1_i1|m.7487	gi|642924310|ref|XP_008194243.1| PREDICTED: sentrin-specific protease-like [Tribolium castaneum]	47.48	9e-156
c10567_g1_i1|m.7488	gi|189233856|ref|XP_972507.2| PREDICTED: putative GTP-binding protein 6 [Tribolium castaneum]	57.8	5e-107
c10568_g1_i1|m.7490	gi|91082853|ref|XP_970517.1| PREDICTED: glyoxylate/hydroxypyruvate reductase A HPR2 [Tribolium castaneum]	46.71	4e-105
c10569_g1_i1|m.7492	gi|91078340|ref|XP_973522.1| PREDICTED: palmitoyltransferase ZDHHC3 [Tribolium castaneum]	85.31	0
c10570_g1_i1|m.7493	gi|642915452|ref|XP_972468.2| PREDICTED: UDP-sugar transporter UST74c [Tribolium castaneum]	72.31	6e-161
c10571_g1_i1|m.7494	gi|189236774|ref|XP_001807993.1| PREDICTED: serine/threonine-protein phosphatase 4 regulatory subunit 2 [Tribolium castaneum]	70.1	2e-144
c10572_g1_i1|m.7495	gi|642936019|ref|XP_008198271.1| PREDICTED: uncharacterized protein LOC103314323 isoform X2 [Tribolium castaneum]	43.45	8e-96
c10573_g1_i2|m.7499	gi|91089477|ref|XP_969208.1| PREDICTED: zinc finger HIT domain-containing protein 3 [Tribolium castaneum]	56.49	3e-45
c10575_g1_i1|m.7501	gi|642936333|ref|XP_008198399.1| PREDICTED: calcium-binding protein E63-1 [Tribolium castaneum]	52.47	3e-57
c10577_g1_i1|m.7508	gi|189234066|ref|XP_970272.2| PREDICTED: calcium uptake protein 3, mitochondrial isoform X2 [Tribolium castaneum]	74.37	0
c10577_g1_i3|m.7513	gi|642912019|ref|XP_008199062.1| PREDICTED: calcium uptake protein 3, mitochondrial isoform X1 [Tribolium castaneum]	74.34	0
c10577_g1_i3|m.7514	gi|91076222|ref|XP_972737.1| PREDICTED: protein phosphatase methylesterase 1 [Tribolium castaneum]	51.88	3e-143
c10578_g1_i1|m.7515	gi|91079180|ref|XP_968196.1| PREDICTED: cylicin-2 [Tribolium castaneum]	38.01	6e-28
c10579_g1_i1|m.7516	gi|642910324|ref|XP_008200283.1| PREDICTED: serologically defined colon cancer antigen 3 homolog isoform X1 [Tribolium castaneum]	53.81	9e-135
c10580_g1_i1|m.7520	gi|642917706|ref|XP_008191338.1| PREDICTED: WD repeat-containing protein 43 [Tribolium castaneum]	50	0
c10581_g1_i2|m.7523	gi|642939202|ref|XP_008200380.1| PREDICTED: latrophilin Cirl [Tribolium castaneum]	74.78	0
c10584_g1_i2|m.7525	gi|91081585|ref|XP_975324.1| PREDICTED: protein FAM177A1 [Tribolium castaneum]	52.24	1e-43
c10585_g1_i1|m.7526	gi|189234046|ref|XP_968851.2| PREDICTED: uncharacterized protein LOC657290 isoform X1 [Tribolium castaneum]	44.28	1e-111
c10586_g1_i1|m.7527	gi|642930026|ref|XP_008196217.1| PREDICTED: homothorax isoform X1 [Tribolium castaneum]	94.75	0
c10588_g1_i1|m.7533	gi|642916939|ref|XP_008199562.1| PREDICTED: uncharacterized protein LOC660630 isoform X2 [Tribolium castaneum]	57.66	1e-106
c10589_g1_i1|m.7534	gi|642918925|ref|XP_008191659.1| PREDICTED: pyruvate carboxylase, mitochondrial isoform X2 [Tribolium castaneum]	85.91	0
c10590_g1_i2|m.7537	gi|91083695|ref|XP_966688.1| PREDICTED: cdc42 homolog [Tribolium castaneum]	97.91	3e-137
c10596_g2_i2|m.7546	gi|642935185|ref|XP_008199683.1| PREDICTED: uncharacterized protein LOC655640 [Tribolium castaneum]	70.67	0
c10597_g1_i1|m.7547	gi|642931459|ref|XP_008196593.1| PREDICTED: testis-expressed sequence 2 protein isoform X1 [Tribolium castaneum]	47.03	0
c10598_g1_i2|m.7553	gi|642911779|ref|XP_008200738.1| PREDICTED: trehalase-like isoform X1 [Tribolium castaneum]	61.57	0
c10599_g1_i1|m.7554	gi|642939131|ref|XP_967038.2| PREDICTED: stress-induced-phosphoprotein 1-like [Tribolium castaneum]	66.58	2e-162
c1060_g1_i1|m.306	gi|189241359|ref|XP_971054.2| PREDICTED: DNA primase small subunit isoform X2 [Tribolium castaneum]	55.34	3e-165
c10601_g2_i1|m.7558	gi|642921113|ref|XP_008192694.1| PREDICTED: LOW QUALITY PROTEIN: B-cell lymphoma/leukemia 11B [Tribolium castaneum]	81.01	0
c10603_g1_i1|m.7560	gi|642936597|ref|XP_008198501.1| PREDICTED: lys-63-specific deubiquitinase BRCC36-like [Tribolium castaneum]	56.08	1e-96
c10604_g3_i1|m.7561	gi|91088001|ref|XP_973768.1| PREDICTED: peptidyl-tRNA hydrolase ICT1, mitochondrial [Tribolium castaneum]	56.17	1e-64
c10606_g1_i1|m.7564	gi|91079574|ref|XP_966886.1| PREDICTED: ubiquitin carboxyl-terminal hydrolase [Tribolium castaneum]	61.64	2e-109
c10607_g1_i1|m.7565	gi|642932520|ref|XP_008197148.1| PREDICTED: LOW QUALITY PROTEIN: dihydrolipoyllysine-residue acetyltransferase component of pyruvate dehydrogenase complex, mitochondrial [Tribolium castaneum]	62.75	0
c10607_g2_i1|m.7566	gi|642914425|ref|XP_008201491.1| PREDICTED: ATP-sensitive inward rectifier potassium channel 12 [Tribolium castaneum]	79.87	0
c10609_g1_i1|m.7571	gi|15451735|ref|NP_203162.1|ND5_15766 NADH dehydrogenase subunit 5 (mitochondrion) [Tribolium castaneum]	75	3e-74
c10610_g1_i1|m.7572	gi|642924466|ref|XP_001813222.2| PREDICTED: peroxisome biogenesis protein 1 [Tribolium castaneum]	44.86	0
c10612_g1_i2|m.7575	gi|642928367|ref|XP_008192714.1| PREDICTED: uncharacterized protein LOC103312832 isoform X2 [Tribolium castaneum]	63.09	6e-175
c10613_g2_i1|m.7577	gi|642927067|ref|XP_008195123.1| PREDICTED: protein RIC1 homolog [Tribolium castaneum]	71.04	0
c10615_g2_i2|m.7583	gi|642936804|ref|XP_008199623.1| PREDICTED: protein sickie isoform X1 [Tribolium castaneum]	78.92	0
c10617_g1_i1|m.7591	gi|91089747|ref|XP_975172.1| PREDICTED: bifunctional coenzyme A synthase-like isoform X1 [Tribolium castaneum]	58.33	0
c10618_g1_i1|m.7592	gi|189234792|ref|XP_001807073.1| PREDICTED: zinc finger protein 571 [Tribolium castaneum]	53.12	0
c10619_g1_i1|m.7594	gi|642935952|ref|XP_008198244.1| PREDICTED: COP9 signalosome complex subunit 5 [Tribolium castaneum]	93.02	0
c1062_g1_i1|m.307	gi|642937733|ref|XP_008198924.1| PREDICTED: tropomyosin-2 isoform X17 [Tribolium castaneum]	95.02	8e-158
c10622_g1_i1|m.7597	gi|642934583|ref|XP_970747.2| PREDICTED: protein YIPF3 isoform X1 [Tribolium castaneum]	45.99	3e-49
c10622_g1_i1|m.7598	gi|642934585|ref|XP_008197727.1| PREDICTED: mediator of RNA polymerase II transcription subunit 9 isoform X2 [Tribolium castaneum]	76.99	4e-58
c10623_g1_i1|m.7599	gi|189241236|ref|XP_972549.2| PREDICTED: mitochondrial ribonuclease P protein 1 homolog [Tribolium castaneum]	62.28	3e-154
c10624_g1_i1|m.7600	gi|642924510|ref|XP_008194324.1| PREDICTED: uncharacterized protein LOC662121 isoform X1 [Tribolium castaneum]	50.55	0
c10624_g1_i2|m.7601	gi|642924512|ref|XP_008194326.1| PREDICTED: uncharacterized protein LOC662121 isoform X2 [Tribolium castaneum]	50.55	0
c10627_g1_i1|m.7604	gi|270297178|ref|NP_001161915.1| cuticular protein analogous to peritrophins 3-E [Tribolium castaneum]	62.04	5e-105
c10629_g1_i3|m.7608	gi|642918199|ref|XP_008191407.1| PREDICTED: tyrosine-protein kinase Src64B [Tribolium castaneum]	81.02	0
c1063_g1_i1|m.308	gi|91091928|ref|XP_967487.1| PREDICTED: eukaryotic translation initiation factor 4B [Tribolium castaneum]	55.36	8e-104
c10630_g1_i1|m.7609	gi|642924364|ref|XP_008194266.1| PREDICTED: hydroxysteroid dehydrogenase-like protein 1 [Tribolium castaneum]	62.87	8e-147
c10631_g1_i1|m.7610	gi|642926049|ref|XP_008194744.1| PREDICTED: tetratricopeptide repeat protein 12-like [Tribolium castaneum]	58.85	4e-85
c10632_g1_i2|m.7612	gi|642914487|ref|XP_008201695.1| PREDICTED: uncharacterized protein C6orf106 homolog isoform X1 [Tribolium castaneum]	67.71	4e-111
c10633_g1_i2|m.7613	gi|91091212|ref|XP_966668.1| PREDICTED: probable RISC-loading complex subunit BRAFLDRAFT_242885 isoform X1 [Tribolium castaneum]	75.4	0
c10634_g1_i1|m.7614	gi|91080041|ref|XP_972705.1| PREDICTED: tumor susceptibility gene 101 protein [Tribolium castaneum]	70.86	0
c10635_g1_i2|m.7616	gi|642927466|ref|XP_008195284.1| PREDICTED: protein arginine N-methyltransferase 6 [Tribolium castaneum]	60	2e-159
c10636_g1_i1|m.7618	gi|642935548|ref|XP_008198054.1| PREDICTED: caspase-7-like [Tribolium castaneum]	48.81	7e-86
c10637_g1_i4|m.7619	gi|91092284|ref|XP_968475.1| PREDICTED: 1-acyl-sn-glycerol-3-phosphate acyltransferase alpha [Tribolium castaneum]	65.8	1e-134
c10638_g1_i1|m.7620	gi|91090182|ref|XP_966481.1| PREDICTED: methenyltetrahydrofolate synthase domain-containing protein [Tribolium castaneum]	54.76	2e-163
c10639_g1_i1|m.7622	gi|642928233|ref|XP_008195498.1| PREDICTED: uncharacterized protein LOC103313601 [Tribolium castaneum]	44.41	4e-90
c10641_g1_i1|m.7626	gi|91077058|ref|XP_968505.1| PREDICTED: importin subunit alpha-7 [Tribolium castaneum]	84.79	0
c10643_g1_i3|m.7630	gi|91088839|ref|XP_970745.1| PREDICTED: RNA-binding protein lark [Tribolium castaneum]	89.66	0
c10645_g1_i1|m.7633	gi|642923955|ref|XP_008193939.1| PREDICTED: uncharacterized protein LOC100141833 [Tribolium castaneum]	61.49	8e-56
c10647_g1_i2|m.7638	gi|642931337|ref|XP_008196536.1| PREDICTED: centrosomal protein of 162 kDa [Tribolium castaneum]	52.26	0
c10648_g1_i1|m.7640	gi|189234915|ref|XP_001809744.1| PREDICTED: biogenesis of lysosome-related organelles complex 1 subunit 3 [Tribolium castaneum]	51.88	1e-48
c10649_g1_i1|m.7642	gi|642924858|ref|XP_008194069.1| PREDICTED: uncharacterized protein LOC103313199 [Tribolium castaneum]	48.65	2e-113
c10650_g1_i1|m.7643	gi|91091932|ref|XP_966409.1| PREDICTED: structural maintenance of chromosomes protein 3 [Tribolium castaneum]	90.91	0
c10651_g1_i1|m.7646	gi|642916856|ref|XP_968783.3| PREDICTED: zinc finger protein on ecdysone puffs [Tribolium castaneum]	50.47	2e-173
c10652_g1_i1|m.7648	gi|642917201|ref|XP_008191161.1| PREDICTED: epimerase family protein SDR39U1 [Tribolium castaneum]	61.67	9e-141
c10653_g1_i1|m.7649	gi|113951715|ref|NP_001039287.1| chemosensory protein 5 precursor [Tribolium castaneum]	50.34	2e-41
c10656_g1_i1|m.7653	gi|642925712|ref|XP_008194681.1| PREDICTED: hyaluronidase [Tribolium castaneum]	52.68	4e-108
c10657_g2_i2|m.7656	gi|642912884|ref|XP_008201294.1| PREDICTED: dentin sialophosphoprotein isoform X3 [Tribolium castaneum]	50.7	0
c1066_g1_i1|m.310	gi|642931579|ref|XP_008196643.1| PREDICTED: uncharacterized protein LOC103313913 isoform X4 [Tribolium castaneum]	40.98	3e-07
c10660_g1_i2|m.7661	gi|91083715|ref|XP_970185.1| PREDICTED: RNA-binding protein 45 [Tribolium castaneum]	62.05	0
c10661_g1_i1|m.7662	gi|189238143|ref|XP_001814545.1| PREDICTED: synaptosomal-associated protein 29 [Tribolium castaneum]	60.32	6e-97
c10662_g1_i1|m.7666	gi|642923159|ref|XP_008193634.1| PREDICTED: uncharacterized protein LOC103313083 isoform X2 [Tribolium castaneum]	45.68	1e-99
c10663_g1_i1|m.7667	gi|91091974|ref|XP_968950.1| PREDICTED: protein prenyltransferase alpha subunit repeat-containing protein 1-B [Tribolium castaneum]	39.37	2e-98
c10664_g1_i2|m.7671	gi|642914174|ref|XP_008201575.1| PREDICTED: KAT8 regulatory NSL complex subunit 3 isoform X2 [Tribolium castaneum]	50.96	0
c10664_g1_i2|m.7672	gi|642914168|ref|XP_972661.2| PREDICTED: crossover junction endonuclease EME1 isoform X1 [Tribolium castaneum]	55.48	2e-54
c10665_g1_i1|m.7674	gi|642929820|ref|XP_008195990.1| PREDICTED: uncharacterized protein LOC664501 [Tribolium castaneum]	39.1	2e-82
c10666_g1_i1|m.7675	gi|91082901|ref|XP_972219.1| PREDICTED: zinc finger CCHC domain-containing protein 8 homolog [Tribolium castaneum]	41.21	7e-84
c10667_g1_i2|m.7677	gi|91078490|ref|XP_968588.1| PREDICTED: COP9 signalosome complex subunit 1 [Tribolium castaneum]	90.97	0
c10668_g1_i1|m.7678	gi|642925087|ref|XP_008194164.1| PREDICTED: phosphatidylinositol N-acetylglucosaminyltransferase subunit P [Tribolium castaneum]	48.73	4e-52
c10668_g1_i1|m.7679	gi|642925089|ref|XP_008194165.1| PREDICTED: EKC/KEOPS complex subunit LAGE3 isoform X1 [Tribolium castaneum]	58.82	4e-30
c10669_g1_i1|m.7680	gi|189233742|ref|XP_971800.2| PREDICTED: arginine kinase isoform X2 [Tribolium castaneum]	90.99	0
c10670_g1_i1|m.7682	gi|91087871|ref|XP_969564.1| PREDICTED: 60S ribosomal protein L32 [Tribolium castaneum]	90.3	6e-88
c10671_g1_i1|m.7683	gi|189236109|ref|XP_001813546.1| PREDICTED: nucleoporin Nup37 isoform X2 [Tribolium castaneum]	51.44	6e-112
c10672_g1_i2|m.7685	gi|642921389|ref|XP_008192846.1| PREDICTED: protein YIPF5 [Tribolium castaneum]	74.19	2e-119
c10673_g1_i1|m.7686	gi|91087121|ref|XP_975196.1| PREDICTED: proliferating cell nuclear antigen [Tribolium castaneum]	83.33	2e-139
c10674_g1_i1|m.7687	gi|642920001|ref|XP_008192162.1| PREDICTED: alpha-(1,3)-fucosyltransferase 10 [Tribolium castaneum]	49.14	4e-134
c10675_g1_i1|m.7688	gi|642911849|ref|XP_008200772.1| PREDICTED: zinc transporter 2-like [Tribolium castaneum]	71.67	8e-179
c10678_g1_i1|m.7692	gi|642921909|ref|XP_967739.2| PREDICTED: peptide chain release factor 1-like, mitochondrial [Tribolium castaneum]	57.33	1e-152
c10679_g1_i1|m.7693	gi|91090063|ref|XP_969355.1| PREDICTED: protein SCO1 homolog, mitochondrial [Tribolium castaneum]	64.71	6e-125
c10680_g1_i2|m.7695	gi|189237437|ref|XP_001815618.1| PREDICTED: alpha-tocopherol transfer protein-like [Tribolium castaneum]	55.41	5e-115
c10682_g1_i1|m.7696	gi|642925724|ref|XP_008194686.1| PREDICTED: uncharacterized protein LOC663230 [Tribolium castaneum]	42.21	7e-63
c10683_g1_i2|m.7698	gi|642927503|ref|XP_008195295.1| PREDICTED: NADH dehydrogenase (ubiquinone) Fe-S protein 5, 15kDa (NADH-coenzyme Q reductase) isoform X1 [Tribolium castaneum]	55.45	4e-35
c10684_g1_i1|m.7699	gi|91094119|ref|XP_968179.1| PREDICTED: mannose-1-phosphate guanyltransferase alpha-A [Tribolium castaneum]	78.12	0
c10685_g1_i1|m.7701	gi|91090234|ref|XP_968776.1| PREDICTED: probable small nuclear ribonucleoprotein Sm D2 [Tribolium castaneum]	88.03	8e-56
c10686_g1_i2|m.7703	gi|91077456|ref|XP_967801.1| PREDICTED: sine oculis-binding protein homolog [Tribolium castaneum]	51.45	2e-98
c10687_g1_i1|m.7704	gi|642928862|ref|XP_008195593.1| PREDICTED: probable ATP-dependent RNA helicase DDX43 [Tribolium castaneum]	67.08	0
c10689_g2_i1|m.7706	gi|642931094|ref|XP_008196209.1| PREDICTED: serine protease persephone-like isoform X1 [Tribolium castaneum]	46.8	7e-103
c10691_g1_i1|m.7708	gi|91086675|ref|XP_968460.1| PREDICTED: serine--tRNA ligase, cytoplasmic [Tribolium castaneum]	79.32	0
c10692_g1_i1|m.7709	gi|642914669|ref|XP_008190307.1| PREDICTED: uncharacterized protein LOC662983 isoform X2 [Tribolium castaneum]	72.05	0
c10694_g1_i1|m.7712	gi|91078982|ref|XP_974523.1| PREDICTED: pyruvate dehydrogenase E1 component subunit alpha, mitochondrial [Tribolium castaneum]	78.28	0
c10695_g1_i1|m.7713	gi|642936911|ref|XP_008194442.1| PREDICTED: PHD finger protein 14 isoform X2 [Tribolium castaneum]	69.01	0
c10697_g1_i1|m.7714	gi|189236353|ref|XP_001807129.1| PREDICTED: signal recognition particle receptor subunit alpha homolog [Tribolium castaneum]	78.72	0
c1070_g1_i1|m.313	gi|91089935|ref|XP_973085.1| PREDICTED: nucleoplasmin-like protein isoform X2 [Tribolium castaneum]	76.74	2e-72
c10701_g1_i1|m.7721	gi|642939916|ref|XP_973092.3| PREDICTED: trafficking protein particle complex subunit 5 [Tribolium castaneum]	89.3	5e-126
c10702_g1_i1|m.7722	gi|642912369|ref|XP_008199613.1| PREDICTED: diuretic hormone class 2 isoform X3 [Tribolium castaneum]	67.86	3e-48
c10703_g1_i1|m.7723	gi|91087837|ref|XP_967757.1| PREDICTED: putative fatty acyl-CoA reductase CG5065 [Tribolium castaneum]	54.79	0
c10704_g1_i1|m.7724	gi|189234230|ref|XP_973019.2| PREDICTED: uncharacterized protein LOC661786 [Tribolium castaneum]	63.41	3e-65
c10704_g1_i1|m.7725	gi|91093050|ref|XP_967369.1| PREDICTED: DNA-directed RNA polymerase I subunit RPA12 [Tribolium castaneum]	55.73	2e-43
c10705_g1_i1|m.7726	gi|642938523|ref|XP_008199827.1| PREDICTED: cysteine-rich hydrophobic domain 2 protein [Tribolium castaneum]	90.96	1e-93
c10709_g1_i1|m.7728	gi|91095305|ref|XP_972246.1| PREDICTED: beta-1,3-galactosyltransferase 5-like, partial [Tribolium castaneum]	50.34	2e-99
c10709_g1_i2|m.7729	gi|91079971|ref|XP_969899.1| PREDICTED: beta-1,3-galactosyltransferase 5 [Tribolium castaneum]	50.48	7e-101
c10711_g1_i1|m.7732	gi|91088569|ref|XP_973042.1| PREDICTED: hydroxyacyl-coenzyme A dehydrogenase, mitochondrial [Tribolium castaneum]	68.87	1e-162
c10712_g1_i1|m.7734	gi|642910499|ref|XP_008200240.1| PREDICTED: G protein alpha i subunit [Tribolium castaneum]	94.66	0
c10713_g1_i1|m.7735	gi|91091652|ref|XP_971071.1| PREDICTED: mitochondrial-processing peptidase subunit alpha [Tribolium castaneum]	73.47	0
c10714_g1_i1|m.7736	gi|642927330|ref|XP_008195223.1| PREDICTED: STE20-related kinase adapter protein alpha [Tribolium castaneum]	64.96	1e-175
c10715_g1_i1|m.7737	gi|642936630|ref|XP_008198515.1| PREDICTED: serine-arginine protein 55-like [Tribolium castaneum]	82.3	3e-124
c10715_g1_i2|m.7740	gi|642936628|ref|XP_008198513.1| PREDICTED: dual specificity protein phosphatase 19 [Tribolium castaneum]	48.15	3e-58
c10716_g1_i1|m.7741	gi|642925678|ref|XP_974401.2| PREDICTED: ruvB-like 2 [Tribolium castaneum]	88.33	0
c10718_g1_i1|m.7744	gi|642927818|ref|XP_008195414.1| PREDICTED: zinc finger FYVE domain-containing protein 19 [Tribolium castaneum]	63.78	2e-140
c1072_g1_i1|m.314	gi|91082597|ref|XP_967899.1| PREDICTED: 60S ribosomal protein L13 [Tribolium castaneum]	74.55	4e-112
c10720_g1_i1|m.7746	gi|91093142|ref|XP_969809.1| PREDICTED: cell division cycle protein 27 homolog [Tribolium castaneum]	65.41	0
c10722_g1_i1|m.7748	gi|91090882|ref|XP_973170.1| PREDICTED: death-associated protein kinase related [Tribolium castaneum]	65.3	0
c10724_g1_i1|m.7749	gi|91090996|ref|XP_974921.1| PREDICTED: alpha-tocopherol transfer protein [Tribolium castaneum]	54.95	8e-112
c10725_g1_i1|m.7750	gi|642935340|ref|XP_968306.2| PREDICTED: kelch domain-containing protein 10 homolog [Tribolium castaneum]	60.25	1e-169
c10726_g1_i1|m.7752	gi|189236857|ref|XP_974302.2| PREDICTED: proton-coupled amino acid transporter 4 [Tribolium castaneum]	65.51	0
c10727_g1_i1|m.7754	gi|91076150|ref|XP_970566.1| PREDICTED: transmembrane protein 205 [Tribolium castaneum]	47.45	5e-83
c10729_g1_i1|m.7756	gi|91081899|ref|XP_976020.1| PREDICTED: cyclin-Y-like protein 1 [Tribolium castaneum]	90.53	0
c10732_g1_i1|m.7761	gi|189233937|ref|XP_973896.2| PREDICTED: conserved oligomeric Golgi complex subunit 2 [Tribolium castaneum]	43.92	0
c10733_g1_i1|m.7763	gi|189236657|ref|XP_970512.2| PREDICTED: cathepsin O-like [Tribolium castaneum]	45.25	6e-107
c10736_g2_i2|m.7766	gi|642919204|ref|XP_008191779.1| PREDICTED: POU domain protein 2 [Tribolium castaneum]	80.69	0
c10739_g1_i1|m.7767	gi|91087297|ref|XP_975561.1| PREDICTED: protein fem-1 homolog B isoform X2 [Tribolium castaneum]	72.32	0
c10740_g1_i1|m.7771	gi|642929072|ref|XP_008195679.1| PREDICTED: homologous-pairing protein 2 homolog isoform X1 [Tribolium castaneum]	40.3	6e-40
c10740_g2_i1|m.7772	gi|91086839|ref|XP_974133.1| PREDICTED: transmembrane protein 14C [Tribolium castaneum]	73.15	2e-53
c10745_g1_i1|m.7783	gi|642935662|ref|XP_008198105.1| PREDICTED: cytochrome b reductase 1 isoform X2 [Tribolium castaneum]	73.42	3e-141
c10745_g1_i3|m.7786	gi|91090684|ref|XP_974597.1| PREDICTED: cytochrome b reductase 1 isoform X3 [Tribolium castaneum]	75.67	3e-132
c10746_g1_i1|m.7787	gi|91081253|ref|XP_975655.1| PREDICTED: translation initiation factor eIF-2B subunit delta [Tribolium castaneum]	52.82	2e-158
c10747_g1_i2|m.7790	gi|642910322|ref|XP_008200282.1| PREDICTED: LOW QUALITY PROTEIN: calcium-transporting ATPase type 2C member 1 [Tribolium castaneum]	81.84	0
c10748_g1_i1|m.7792	gi|91088177|ref|XP_972343.1| PREDICTED: nuclear nucleic acid-binding protein C1D [Tribolium castaneum]	55.56	1e-51
c10749_g1_i1|m.7793	gi|269995915|ref|NP_001161780.1| yellow-f precursor [Tribolium castaneum]	50.79	6e-152
c10750_g1_i1|m.7794	gi|91091862|ref|XP_968876.1| PREDICTED: AP-3 complex subunit mu-1 [Tribolium castaneum]	91.33	0
c10751_g1_i2|m.7796	gi|642924029|ref|XP_008193977.1| PREDICTED: WD repeat-containing protein 37 isoform X3 [Tribolium castaneum]	72.58	0
c10752_g1_i1|m.7797	gi|642917395|ref|XP_008191178.1| PREDICTED: DNA ligase isoform X1 [Tribolium castaneum]	68.9	0
c10756_g1_i2|m.7801	gi|642912896|ref|XP_971841.2| PREDICTED: THO complex subunit 7 homolog [Tribolium castaneum]	59.42	3e-79
c10757_g1_i2|m.7804	gi|91076220|ref|XP_972698.1| PREDICTED: solute carrier organic anion transporter family member 5A1 [Tribolium castaneum]	82.61	0
c10759_g1_i2|m.7808	gi|642929673|ref|XP_008195930.1| PREDICTED: DNA methyltransferase 1-associated protein 1 [Tribolium castaneum]	77.75	0
c10762_g1_i1|m.7816	gi|642933937|ref|XP_008197573.1| PREDICTED: ADP-ribosylation factor-binding protein GGA3 isoform X1 [Tribolium castaneum]	59.25	0
c10764_g1_i1|m.7819	gi|642927690|ref|XP_966564.2| PREDICTED: uncharacterized protein LOC655002 [Tribolium castaneum]	49.81	2e-81
c10765_g1_i1|m.7820	gi|642914820|ref|XP_967881.3| PREDICTED: uncharacterized protein LOC656247 [Tribolium castaneum]	65.49	2e-112
c10766_g1_i1|m.7822	gi|260447050|ref|NP_001159495.1| lysozyme precursor [Tribolium castaneum]	59.38	3e-39
c10767_g2_i1|m.7823	gi|642922575|ref|XP_008193233.1| PREDICTED: protein DDI1 homolog 2 isoform X3 [Tribolium castaneum]	76.26	0
c10769_g1_i1|m.7825	gi|642920032|ref|XP_008192175.1| PREDICTED: uncharacterized protein LOC103312676 [Tribolium castaneum]	64.94	9e-162
c10770_g1_i3|m.7830	gi|91083251|ref|XP_974045.1| PREDICTED: ATP-dependent RNA helicase WM6 [Tribolium castaneum]	97.41	0
c10771_g1_i2|m.7833	gi|642923760|ref|XP_008193873.1| PREDICTED: jmjC domain-containing protein 4 [Tribolium castaneum]	54.69	9e-76
c10773_g1_i1|m.7836	gi|91084671|ref|XP_966504.1| PREDICTED: lambda-crystallin [Tribolium castaneum]	76.38	0
c10774_g1_i1|m.7837	gi|91092328|ref|XP_970407.1| PREDICTED: probable 28S ribosomal protein S6, mitochondrial [Tribolium castaneum]	70.75	4e-74
c10775_g1_i1|m.7838	gi|91076166|ref|XP_971257.1| PREDICTED: membrane-associated tyrosine- and threonine-specific cdc2-inhibitory kinase [Tribolium castaneum]	39.79	2e-63
c10776_g1_i1|m.7840	gi|91081201|ref|XP_975610.1| PREDICTED: peptidylglycine alpha-hydroxylating monooxygenase [Tribolium castaneum]	59.29	1e-151
c10777_g1_i1|m.7841	gi|91090512|ref|XP_969653.1| PREDICTED: transmembrane protein 177 [Tribolium castaneum]	49.51	2e-103
c10778_g1_i1|m.7842	gi|91090952|ref|XP_974552.1| PREDICTED: probable rRNA-processing protein EBP2 homolog [Tribolium castaneum]	65.29	4e-119
c10780_g1_i1|m.7843	gi|642917617|ref|XP_008193357.1| PREDICTED: protein amalgam-like isoform X1 [Tribolium castaneum]	35.04	4e-82
c10782_g1_i1|m.7847	gi|642927006|ref|XP_008195101.1| PREDICTED: protein disabled isoform X4 [Tribolium castaneum]	51.03	0
c10783_g1_i1|m.7853	gi|642920986|ref|XP_008192642.1| PREDICTED: etoposide-induced protein 2.4 homolog [Tribolium castaneum]	57.19	2e-120
c10785_g1_i1|m.7855	gi|91091940|ref|XP_967719.1| PREDICTED: RWD domain-containing protein 1 [Tribolium castaneum]	66.98	4e-86
c10787_g1_i1|m.7859	gi|642932951|ref|XP_008197201.1| PREDICTED: sodium-independent sulfate anion transporter isoform X1 [Tribolium castaneum]	68.2	0
c10789_g1_i1|m.7862	gi|642915306|ref|XP_008190564.1| PREDICTED: myeloid differentiation primary response protein MyD88-B-like isoform X1 [Tribolium castaneum]	40.77	1e-79
c1079_g1_i1|m.319	gi|642929518|ref|XP_008195870.1| PREDICTED: ubiquitin carboxyl-terminal hydrolase calypso [Tribolium castaneum]	71.65	0
c10791_g1_i1|m.7864	gi|91089631|ref|XP_973546.1| PREDICTED: serine/threonine-protein phosphatase 2A catalytic subunit beta isoform [Tribolium castaneum]	97.73	0
c10794_g1_i1|m.7866	gi|642937356|ref|XP_008198803.1| PREDICTED: raf homolog serine/threonine-protein kinase phl [Tribolium castaneum]	80.42	0
c10796_g1_i1|m.7867	gi|642923500|ref|XP_008193535.1| PREDICTED: flocculation protein FLO11 isoform X1 [Tribolium castaneum]	46.1	1e-146
c10798_g1_i1|m.7871	gi|91078182|ref|XP_967647.1| PREDICTED: beta-galactosidase-1-like protein 2 [Tribolium castaneum]	63.4	0
c10800_g1_i1|m.7872	gi|642935120|ref|XP_008197896.1| PREDICTED: vigilin [Tribolium castaneum]	76.94	0
c10801_g1_i1|m.7874	gi|642928504|ref|XP_008193818.1| PREDICTED: endoplasmic reticulum metallopeptidase 1-like isoform X1 [Tribolium castaneum]	63.33	0
c10802_g1_i1|m.7875	gi|189239014|ref|XP_974755.2| PREDICTED: CCR4-NOT transcription complex subunit 11 [Tribolium castaneum]	77.34	0
c10803_g1_i1|m.7876	gi|642912199|ref|XP_008200849.1| PREDICTED: delta-1-pyrroline-5-carboxylate synthase [Tribolium castaneum]	77.71	0
c10804_g1_i1|m.7877	gi|189236351|ref|XP_001810886.1| PREDICTED: phosphatidylinositol-glycan biosynthesis class X protein [Tribolium castaneum]	49.14	4e-70
c10805_g1_i2|m.7879	gi|91079262|ref|XP_972008.1| PREDICTED: ubiquitin carboxyl-terminal hydrolase 35 [Tribolium castaneum]	57.21	0
c10806_g1_i2|m.7881	gi|642914301|ref|XP_008201628.1| PREDICTED: mediator of RNA polymerase II transcription subunit 28 isoform X1 [Tribolium castaneum]	81.52	6e-125
c10807_g1_i1|m.7882	gi|642929363|ref|XP_008195804.1| PREDICTED: iron-sulfur cluster assembly 2 homolog, mitochondrial [Tribolium castaneum]	72.36	3e-64
c10809_g1_i1|m.7884	gi|642917196|ref|XP_008191158.1| PREDICTED: protein IMPACT-like [Tribolium castaneum]	58.89	1e-105
c10810_g1_i1|m.7885	gi|91080473|ref|XP_970438.1| PREDICTED: mitochondrial inner membrane protease subunit 1 [Tribolium castaneum]	61.97	2e-68
c10811_g1_i1|m.7886	gi|189233641|ref|XP_001814986.1| PREDICTED: nicotinate phosphoribosyltransferase isoform X1 [Tribolium castaneum]	75.27	0
c10812_g1_i1|m.7887	gi|91084817|ref|XP_973265.1| PREDICTED: ribosome biogenesis protein BOP1 homolog [Tribolium castaneum]	76.09	0
c10815_g1_i1|m.7889	gi|91091104|ref|XP_968777.1| PREDICTED: mpv17-like protein 2 [Tribolium castaneum]	49	8e-66
c10816_g1_i1|m.7890	gi|642931633|ref|XP_008196665.1| PREDICTED: flotillin-1 [Tribolium castaneum]	76	0
c10817_g1_i1|m.7892	gi|642924010|ref|XP_008193968.1| PREDICTED: ran-binding protein 9 isoform X3 [Tribolium castaneum]	81.08	0
c10818_g1_i1|m.7894	gi|91077054|ref|XP_966585.1| PREDICTED: probable transaldolase [Tribolium castaneum]	74.7	0
c10819_g1_i1|m.7895	gi|91081707|ref|XP_971145.1| PREDICTED: lysophospholipase-like protein 1 [Tribolium castaneum]	56.95	2e-91
c10820_g1_i1|m.7896	gi|642939002|ref|XP_008200112.1| PREDICTED: uncharacterized protein LOC103314838 isoform X1 [Tribolium castaneum]	42.67	2e-63
c10821_g1_i2|m.7899	gi|642922425|ref|XP_008193158.1| PREDICTED: eukaryotic initiation factor 4a isoform X1 [Tribolium castaneum]	92.34	0
c10822_g1_i1|m.7901	gi|189241511|ref|XP_967615.2| PREDICTED: U3 small nucleolar ribonucleoprotein protein IMP3 [Tribolium castaneum]	80.66	6e-108
c10823_g1_i1|m.7902	gi|91087937|ref|XP_971924.1| PREDICTED: alpha-ketoglutarate-dependent dioxygenase alkB homolog 4 [Tribolium castaneum]	65.16	2e-139
c10825_g1_i1|m.7907	gi|91084477|ref|XP_971283.1| PREDICTED: uncharacterized protein LOC659924 [Tribolium castaneum]	55.89	0
c10826_g1_i4|m.7909	gi|642917759|ref|XP_008191357.1| PREDICTED: uncharacterized protein LOC100141567 isoform X1 [Tribolium castaneum]	69.47	1e-131
c10826_g1_i6|m.7911	gi|642917762|ref|XP_008191358.1| PREDICTED: uncharacterized protein LOC100141567 isoform X3 [Tribolium castaneum]	68.39	8e-53
c10828_g1_i1|m.7912	gi|642929988|ref|XP_008196055.1| PREDICTED: patj homolog [Tribolium castaneum]	72.18	0
c10830_g1_i1|m.7915	gi|91089165|ref|XP_973951.1| PREDICTED: H/ACA ribonucleoprotein complex non-core subunit NAF1 [Tribolium castaneum]	55.83	2e-68
c10831_g1_i1|m.7916	gi|91077766|ref|XP_968426.1| PREDICTED: WD repeat domain phosphoinositide-interacting protein 4 [Tribolium castaneum]	70.98	0
c10832_g1_i2|m.7920	gi|642916366|ref|XP_008190991.1| PREDICTED: enoyl-CoA delta isomerase 1, mitochondrial-like [Tribolium castaneum]	57.14	1e-116
c10833_g1_i1|m.7922	gi|91079166|ref|XP_967495.1| PREDICTED: HEAT repeat-containing protein 1 homolog [Tribolium castaneum]	45.86	0
c10835_g1_i1|m.7924	gi|642937318|ref|XP_008198785.1| PREDICTED: S-adenosylmethionine synthase isoform X2 [Tribolium castaneum]	89.6	0
c10837_g2_i1|m.7927	gi|642927029|ref|XP_008195110.1| PREDICTED: CREB-regulated transcription coactivator 1-like isoform X4 [Tribolium castaneum]	65.94	0
c10839_g1_i1|m.7932	gi|642932304|ref|XP_008197057.1| PREDICTED: protein UXT isoform X2 [Tribolium castaneum]	45.99	8e-34
c10841_g1_i1|m.7933	gi|91082175|ref|XP_971023.1| PREDICTED: trafficking protein particle complex subunit 3 [Tribolium castaneum]	85.39	4e-115
c10842_g1_i2|m.7935	gi|642917862|ref|XP_008191318.1| PREDICTED: protein dopey-1 homolog [Tribolium castaneum]	63.91	0
c10843_g1_i1|m.7938	gi|642926867|ref|XP_008195045.1| PREDICTED: scavenger receptor class B member 1 isoform X2 [Tribolium castaneum]	69.31	0
c10846_g1_i1|m.7944	gi|642932298|ref|XP_008197054.1| PREDICTED: uncharacterized protein C12orf31 homolog [Tribolium castaneum]	51.35	7e-31
c10847_g1_i1|m.7945	gi|642921236|ref|XP_008192775.1| PREDICTED: apoptosis-stimulating of p53 protein 1 isoform X4 [Tribolium castaneum]	64.75	0
c10848_g1_i1|m.7948	gi|91089517|ref|XP_970614.1| PREDICTED: thioredoxin domain-containing protein 9 [Tribolium castaneum]	53.7	5e-92
c10849_g1_i1|m.7949	gi|642919312|ref|XP_008191821.1| PREDICTED: periodic tryptophan protein 1 homolog [Tribolium castaneum]	61.17	0
c10850_g1_i3|m.7954	gi|642918646|ref|XP_008200444.1| PREDICTED: uncharacterized aarF domain-containing protein kinase 5 [Tribolium castaneum]	55.86	0
c10851_g1_i2|m.7956	gi|642923042|ref|XP_008200506.1| PREDICTED: transmembrane protein 164 [Tribolium castaneum]	74.48	1e-151
c10852_g1_i1|m.7957	gi|642918239|ref|XP_008191425.1| PREDICTED: protein enabled isoform X2 [Tribolium castaneum]	76.87	8e-122
c10854_g1_i1|m.7963	gi|642922919|ref|XP_008200452.1| PREDICTED: uncharacterized protein LOC103314926 [Tribolium castaneum]	30.24	9e-45
c10856_g1_i2|m.7966	gi|91083731|ref|XP_970731.1| PREDICTED: tyrosine aminotransferase [Tribolium castaneum]	57.14	6e-57
c10857_g1_i1|m.7967	gi|91087949|ref|XP_972541.1| PREDICTED: rhomboid-related protein 2 [Tribolium castaneum]	64.79	3e-172
c10858_g1_i1|m.7968	gi|642924477|ref|XP_008194313.1| PREDICTED: insulin-like growth factor-binding protein complex acid labile subunit [Tribolium castaneum]	81.39	0
c10859_g1_i1|m.7969	gi|237820629|ref|NP_001153782.1| transmembrane protein 120B [Tribolium castaneum]	76.11	0
c10860_g1_i1|m.7970	gi|91078790|ref|XP_969765.1| PREDICTED: retinoblastoma-binding protein 5 [Tribolium castaneum]	83.51	0
c10861_g1_i1|m.7971	gi|91089485|ref|XP_969495.1| PREDICTED: matrix metalloproteinase-14 [Tribolium castaneum]	51.68	2e-135
c10863_g1_i1|m.7975	gi|642929027|ref|XP_973541.3| PREDICTED: probable maleylacetoacetate isomerase 2 isoform X2 [Tribolium castaneum]	91.43	1e-144
c10864_g1_i1|m.7976	gi|91082929|ref|XP_972879.1| PREDICTED: ubiquitin-conjugating enzyme E2Q-like protein CG4502 [Tribolium castaneum]	81.6	1e-149
c10865_g1_i1|m.7977	gi|642910779|ref|XP_008193406.1| PREDICTED: membrane-associated guanylate kinase, WW and PDZ domain-containing protein 1 [Tribolium castaneum]	70.62	0
c10866_g1_i1|m.7980	gi|642920364|ref|XP_008192315.1| PREDICTED: uncharacterized protein LOC103312714 [Tribolium castaneum]	27.88	4e-16
c10866_g1_i2|m.7982	gi|642920374|ref|XP_008192319.1| PREDICTED: uncharacterized protein LOC664274 [Tribolium castaneum]	59.48	4e-65
c10867_g1_i1|m.7983	gi|189239328|ref|XP_973240.2| PREDICTED: ribosome-releasing factor 2, mitochondrial [Tribolium castaneum]	61.41	0
c10868_g1_i1|m.7985	gi|91092056|ref|XP_970271.1| PREDICTED: dihydropyrimidine dehydrogenase [NADP(+)] isoform X2 [Tribolium castaneum]	74.93	0
c10871_g1_i1|m.7988	gi|91080193|ref|XP_971209.1| PREDICTED: 39S ribosomal protein L17, mitochondrial [Tribolium castaneum]	80.49	3e-93
c10872_g2_i3|m.7991	gi|91092690|ref|XP_971771.1| PREDICTED: myocyte-specific enhancer factor 2 isoform X2 [Tribolium castaneum]	86.54	0
c10873_g1_i1|m.7996	gi|91087023|ref|XP_974255.1| PREDICTED: ethanolaminephosphotransferase 1-like [Tribolium castaneum]	63.4	0
c10874_g1_i1|m.7997	gi|91085575|ref|XP_968070.1| PREDICTED: glutathione synthetase-like isoform X2 [Tribolium castaneum]	64.94	0
c10876_g1_i1|m.8002	gi|91095011|ref|XP_969955.1| PREDICTED: transcription initiation factor TFIID subunit 9 [Tribolium castaneum]	61.09	2e-91
c10877_g1_i1|m.8003	gi|642935459|ref|XP_972294.2| PREDICTED: uncharacterized protein LOC661011 isoform X2 [Tribolium castaneum]	53.46	2e-80
c10878_g1_i1|m.8009	gi|642933178|ref|XP_008197290.1| PREDICTED: G protein-activated inward rectifier potassium channel 3-like isoform X2 [Tribolium castaneum]	73.02	0
c10879_g2_i1|m.8012	gi|642936951|ref|XP_008198626.1| PREDICTED: protein ENL [Tribolium castaneum]	54.05	1e-74
c10880_g1_i2|m.8014	gi|91082507|ref|XP_973065.1| PREDICTED: protein kinase DC2 [Tribolium castaneum]	83.95	0
c10881_g1_i1|m.8015	gi|91084689|ref|XP_968899.1| PREDICTED: Golgi SNAP receptor complex member 1 [Tribolium castaneum]	72.81	1e-121
c10882_g1_i1|m.8016	gi|642938021|ref|XP_008199174.1| PREDICTED: alpha-aminoadipic semialdehyde synthase, mitochondrial isoform X1 [Tribolium castaneum]	77.31	0
c10883_g1_i1|m.8017	gi|642924572|ref|XP_008194349.1| PREDICTED: hsp90 co-chaperone Cdc37 [Tribolium castaneum]	75.12	2e-102
c10884_g1_i1|m.8018	gi|91090900|ref|XP_973581.1| PREDICTED: peroxisomal membrane protein PMP22 [Tribolium castaneum]	62.7	2e-85
c10885_g1_i1|m.8019	gi|91089889|ref|XP_966960.1| PREDICTED: actin-like protein 6B [Tribolium castaneum]	84.36	0
c10886_g1_i1|m.8020	gi|91092792|ref|XP_974059.1| PREDICTED: solute carrier family 41 member 1 [Tribolium castaneum]	77.38	0
c10888_g1_i1|m.8024	gi|91086025|ref|XP_973118.1| PREDICTED: D-beta-hydroxybutyrate dehydrogenase, mitochondrial [Tribolium castaneum]	52.35	6e-138
c10889_g1_i1|m.8025	gi|91083541|ref|XP_966421.1| PREDICTED: guanine nucleotide-binding protein G(o) subunit alpha isoform X1 [Tribolium castaneum]	96.89	0
c10889_g1_i2|m.8026	gi|91083543|ref|XP_975838.1| PREDICTED: guanine nucleotide-binding protein G(o) subunit alpha isoform X2 [Tribolium castaneum]	99.15	0
c10890_g1_i1|m.8027	gi|189240813|ref|XP_001811587.1| PREDICTED: 4-aminobutyrate aminotransferase, mitochondrial-like [Tribolium castaneum]	67.21	0
c10893_g1_i1|m.8029	gi|642912959|ref|XP_008201326.1| PREDICTED: programmed cell death 6-interacting protein [Tribolium castaneum]	72.03	0
c10895_g1_i1|m.8031	gi|190360719|ref|NP_001121967.1| knirps [Tribolium castaneum]	76.11	5e-100
c10895_g2_i1|m.8032	gi|642917978|ref|XP_008198968.1| PREDICTED: mediator of RNA polymerase II transcription subunit 29 [Tribolium castaneum]	81.16	1e-81
c10896_g1_i2|m.8035	gi|189236049|ref|XP_001809395.1| PREDICTED: tudor domain-containing protein 3-like [Tribolium castaneum]	44.77	2e-113
c10896_g1_i2|m.8036	gi|642918892|ref|XP_973654.2| PREDICTED: WASH complex subunit CCDC53 homolog [Tribolium castaneum]	54.9	1e-49
c10897_g1_i1|m.8037	gi|642920336|ref|XP_008192303.1| PREDICTED: zinc finger CCCH domain-containing protein 14 isoform X1 [Tribolium castaneum]	51.13	0
c10898_g1_i1|m.8038	gi|642934609|ref|XP_008197736.1| PREDICTED: corepressor interacting with RBPJ 1 [Tribolium castaneum]	78.93	2e-136
c10899_g1_i1|m.8039	gi|642938161|ref|XP_968707.2| PREDICTED: ras-related and estrogen-regulated growth inhibitor-like protein [Tribolium castaneum]	64.45	2e-100
c109_g2_i1|m.36	gi|642911684|ref|XP_008200700.1| PREDICTED: prohormone-4 [Tribolium castaneum]	93.63	8e-134
c10900_g1_i1|m.8040	gi|91088191|ref|XP_972764.1| PREDICTED: ribonuclease UK114 [Tribolium castaneum]	66.18	2e-60
c10901_g1_i1|m.8041	gi|91091780|ref|XP_969605.1| PREDICTED: ubiquitin thioesterase OTU1 [Tribolium castaneum]	65.48	2e-149
c10903_g1_i2|m.8046	gi|91088015|ref|XP_974053.1| PREDICTED: sialin [Tribolium castaneum]	54.45	0
c10904_g1_i1|m.8047	gi|189237921|ref|XP_001811995.1| PREDICTED: sperm-associated antigen 7 [Tribolium castaneum]	73.06	1e-121
c10905_g1_i1|m.8048	gi|642913655|ref|XP_008201106.1| PREDICTED: nuclear cap-binding protein subunit 1 [Tribolium castaneum]	88.32	0
c10908_g1_i1|m.8052	gi|642913392|ref|XP_008195512.1| PREDICTED: methylmalonic aciduria and homocystinuria type D homolog, mitochondrial-like [Tribolium castaneum]	55.17	4e-100
c10909_g1_i1|m.8053	gi|642925217|ref|XP_008194472.1| PREDICTED: zinc finger protein 729-like isoform X1 [Tribolium castaneum]	65.6	0
c10910_g1_i1|m.8056	gi|237820631|ref|NP_001153783.1| Rab-protein 14 [Tribolium castaneum]	95.35	5e-157
c10912_g1_i1|m.8057	gi|167234441|ref|NP_001107835.1| elongation factor 1-alpha [Tribolium castaneum]	95.8	0
c10913_g1_i1|m.8059	gi|91091742|ref|XP_966408.1| PREDICTED: alanine--glyoxylate aminotransferase 2-like [Tribolium castaneum]	70.91	0
c10914_g1_i1|m.8060	gi|642916650|ref|XP_008192038.1| PREDICTED: uncharacterized protein LOC103312652 [Tribolium castaneum]	51.88	0
c10915_g1_i1|m.8062	gi|642915648|ref|XP_008190695.1| PREDICTED: uncharacterized protein LOC103312267 [Tribolium castaneum]	56.13	0
c10916_g1_i3|m.8067	gi|642917992|ref|XP_008198973.1| PREDICTED: nuclear envelope phosphatase-regulatory subunit 1-like isoform X2 [Tribolium castaneum]	82.68	3e-76
c10916_g1_i4|m.8068	gi|642917990|ref|XP_008198972.1| PREDICTED: nuclear envelope phosphatase-regulatory subunit 1-like isoform X1 [Tribolium castaneum]	81.68	9e-78
c10918_g1_i1|m.8074	gi|91082273|ref|XP_973593.1| PREDICTED: renin receptor [Tribolium castaneum]	44.94	3e-92
c10919_g1_i1|m.8075	gi|642922769|ref|XP_008193318.1| PREDICTED: spermatogenesis-associated protein 13-like isoform X3 [Tribolium castaneum]	41.64	5e-77
c10920_g1_i1|m.8077	gi|642926306|ref|XP_008194870.1| PREDICTED: spindle assembly abnormal protein 6 homolog [Tribolium castaneum]	35.06	1e-81
c10921_g1_i1|m.8079	gi|642923162|ref|XP_968605.2| PREDICTED: O-glucosyltransferase rumi homolog [Tribolium castaneum]	68.59	0
c10922_g3_i1|m.8081	gi|91087223|ref|XP_975486.1| PREDICTED: probable Rho GTPase-activating protein CG5521 isoform X2 [Tribolium castaneum]	73.68	0
c10923_g1_i1|m.8082	gi|189240740|ref|XP_968238.2| PREDICTED: phospholipase A-2-activating protein [Tribolium castaneum]	55.58	0
c10923_g1_i1|m.8083	gi|189240738|ref|XP_968166.2| PREDICTED: NADH dehydrogenase [ubiquinone] 1 beta subcomplex subunit 7 [Tribolium castaneum]	57.94	1e-45
c10924_g1_i2|m.8086	gi|642932825|ref|XP_008197001.1| PREDICTED: gamma-glutamyltranspeptidase 1-like isoform X2 [Tribolium castaneum]	60.53	0
c10925_g1_i1|m.8088	gi|91091694|ref|XP_972612.1| PREDICTED: probable dimethyladenosine transferase [Tribolium castaneum]	78.76	0
c10926_g1_i1|m.8089	gi|91089973|ref|XP_973833.1| PREDICTED: exportin-1 [Tribolium castaneum]	89.6	0
c10927_g2_i1|m.8090	gi|642939345|ref|XP_008197083.1| PREDICTED: uncharacterized protein LOC103314054 [Tribolium castaneum]	34.17	1e-112
c10928_g1_i1|m.8091	gi|642921987|ref|XP_008192971.1| PREDICTED: uncharacterized protein LOC660232 [Tribolium castaneum]	25.37	2e-25
c10929_g1_i2|m.8093	gi|91093222|ref|XP_967206.1| PREDICTED: complement component 1 Q subcomponent-binding protein, mitochondrial [Tribolium castaneum]	56.6	1e-107
c10930_g1_i1|m.8094	gi|642918188|ref|XP_008191403.1| PREDICTED: adenosine 3'-phospho 5'-phosphosulfate transporter 2 isoform X1 [Tribolium castaneum]	71.72	1e-177
c10932_g1_i1|m.8096	gi|91091566|ref|XP_967235.1| PREDICTED: 60S ribosomal protein L7a [Tribolium castaneum]	86.14	1e-158
c10933_g1_i1|m.8097	gi|91094507|ref|XP_971663.1| PREDICTED: 2-oxoisovalerate dehydrogenase subunit alpha, mitochondrial [Tribolium castaneum]	66.14	0
c10934_g1_i1|m.8098	gi|642931918|ref|XP_008196780.1| PREDICTED: coiled-coil-helix-coiled-coil-helix domain-containing protein 10, mitochondrial [Tribolium castaneum]	64.58	1e-41
c10936_g1_i1|m.8101	gi|91077040|ref|XP_967879.1| PREDICTED: signal recognition particle 19 kDa protein [Tribolium castaneum]	80.74	6e-81
c10937_g1_i2|m.8103	gi|642934623|ref|XP_008197742.1| PREDICTED: armadillo segment polarity protein-like isoform X2 [Tribolium castaneum]	93.57	0
c10937_g1_i3|m.8104	gi|642934621|ref|XP_008197741.1| PREDICTED: armadillo segment polarity protein-like isoform X1 [Tribolium castaneum]	90.97	0
c10938_g1_i1|m.8105	gi|91077350|ref|XP_974996.1| PREDICTED: WD40 repeat-containing protein SMU1 [Tribolium castaneum]	93.92	0
c10939_g1_i1|m.8107	gi|642918860|ref|XP_008191618.1| PREDICTED: CMP-sialic acid transporter 1 isoform X1 [Tribolium castaneum]	64.04	6e-149
c10940_g1_i1|m.8108	gi|91079184|ref|XP_968431.1| PREDICTED: histone acetyltransferase KAT8 [Tribolium castaneum]	88.96	0
c10940_g1_i1|m.8109	gi|91078980|ref|XP_974492.1| PREDICTED: cyclin-dependent kinase 10 [Tribolium castaneum]	90.82	0
c10941_g1_i1|m.8112	gi|91088453|ref|XP_969131.1| PREDICTED: DIS3-like exonuclease 2 isoform X1 [Tribolium castaneum]	51.75	0
c10942_g1_i1|m.8113	gi|189238011|ref|XP_001813334.1| PREDICTED: SH3 domain-binding glutamic acid-rich protein homolog [Tribolium castaneum]	73.6	2e-61
c10943_g1_i3|m.8116	gi|642930529|ref|XP_008196443.1| PREDICTED: inositol hexakisphosphate and diphosphoinositol-pentakisphosphate kinase 2 isoform X10 [Tribolium castaneum]	83.24	0
c10944_g1_i2|m.8122	gi|189239912|ref|XP_971042.2| PREDICTED: uncharacterized protein LOC659663 [Tribolium castaneum]	65.12	0
c10945_g1_i1|m.8125	gi|642910289|ref|XP_008198706.1| PREDICTED: U2 snRNP-associated SURP motif-containing protein-like [Tribolium castaneum]	68.28	0
c10947_g1_i1|m.8129	gi|642920456|ref|XP_975647.2| PREDICTED: eukaryotic translation initiation factor 3 subunit F-1 [Tribolium castaneum]	82.62	3e-177
c10948_g1_i1|m.8130	gi|642938719|ref|XP_008196840.1| PREDICTED: brachyurin-like [Tribolium castaneum]	40.08	7e-59
c10949_g1_i1|m.8131	gi|642912540|ref|XP_008200906.1| PREDICTED: uncharacterized protein LOC103315038 [Tribolium castaneum]	48.28	3e-36
c10950_g1_i1|m.8132	gi|91091878|ref|XP_969758.1| PREDICTED: von Willebrand factor D and EGF domain-containing protein [Tribolium castaneum]	60.95	7e-116
c10951_g1_i2|m.8135	gi|642916561|ref|XP_008191701.1| PREDICTED: uncharacterized protein LOC100142540 [Tribolium castaneum]	86.64	0
c10952_g1_i1|m.8136	gi|91080807|ref|XP_969972.1| PREDICTED: proteasome subunit alpha type-3 [Tribolium castaneum]	81.96	2e-156
c10953_g1_i1|m.8137	gi|91080669|ref|XP_975087.1| PREDICTED: vesicle-trafficking protein SEC22b-B [Tribolium castaneum]	88.26	7e-143
c10954_g1_i1|m.8138	gi|91080663|ref|XP_974713.1| PREDICTED: zinc finger protein 330 homolog [Tribolium castaneum]	85.88	1e-165
c10955_g1_i3|m.8142	gi|642910829|ref|XP_008193426.1| PREDICTED: guanylate kinase [Tribolium castaneum]	67.91	5e-96
c10956_g1_i1|m.8143	gi|91080533|ref|XP_972324.1| PREDICTED: alpha-actinin, sarcomeric isoform X2 [Tribolium castaneum]	96.88	0
c10958_g2_i1|m.8145	gi|642918597|ref|XP_008197482.1| PREDICTED: pleckstrin homology domain-containing family G member 4B-like [Tribolium castaneum]	62.33	0
c10959_g1_i2|m.8149	gi|91084417|ref|XP_967827.1| PREDICTED: chromobox protein homolog 3 [Tribolium castaneum]	71.1	8e-86
c10960_g1_i1|m.8150	gi|642914842|ref|XP_008195014.1| PREDICTED: NAD(P)H-hydrate epimerase isoform X1 [Tribolium castaneum]	67.37	1e-114
c10961_g1_i1|m.8152	gi|205277319|ref|NP_001034520.2| vasa RNA helicase [Tribolium castaneum]	64.97	0
c10962_g1_i1|m.8155	gi|642922463|ref|XP_008193182.1| PREDICTED: integrin beta-PS [Tribolium castaneum]	56.49	0
c10963_g1_i1|m.8156	gi|91081191|ref|XP_975602.1| PREDICTED: N-alpha-acetyltransferase 16, NatA auxiliary subunit isoform X2 [Tribolium castaneum]	80.32	0
c10964_g1_i1|m.8157	gi|642929960|ref|XP_008196043.1| PREDICTED: uncharacterized protein LOC661554 [Tribolium castaneum]	41.32	2e-83
c10965_g1_i1|m.8159	gi|91078614|ref|XP_967493.1| PREDICTED: syntaxin-6 [Tribolium castaneum]	85.65	2e-150
c10966_g1_i1|m.8161	gi|91077388|ref|XP_975268.1| PREDICTED: peroxiredoxin-2 [Tribolium castaneum]	86.85	4e-139
c10968_g1_i2|m.8165	gi|91084361|ref|XP_973332.1| PREDICTED: facilitated trehalose transporter Tret1-2 homolog [Tribolium castaneum]	50.1	4e-161
c10970_g1_i1|m.8166	gi|642920030|ref|XP_008192174.1| PREDICTED: transmembrane protein 41B isoform X2 [Tribolium castaneum]	67.06	2e-120
c10971_g1_i2|m.8169	gi|642914860|ref|XP_008195065.1| PREDICTED: myosin light chain kinase, smooth muscle-like isoform X1 [Tribolium castaneum]	66.18	0
c10972_g1_i1|m.8170	gi|91080607|ref|XP_967476.1| PREDICTED: zonadhesin [Tribolium castaneum]	42.11	5e-13
c10973_g1_i1|m.8171	gi|642919362|ref|XP_008191840.1| PREDICTED: 39S ribosomal protein L19, mitochondrial [Tribolium castaneum]	63.36	3e-132
c10974_g1_i1|m.8172	gi|642923046|ref|XP_008200508.1| PREDICTED: fibronectin type-III domain-containing protein 3A isoform X1 [Tribolium castaneum]	65.71	0
c10974_g1_i3|m.8174	gi|642923052|ref|XP_008200511.1| PREDICTED: fibronectin type-III domain-containing protein 3A isoform X2 [Tribolium castaneum]	66.93	0
c10975_g1_i1|m.8175	gi|91077168|ref|XP_972002.1| PREDICTED: organic cation transporter protein isoform X1 [Tribolium castaneum]	60.92	2e-166
c10975_g2_i2|m.8177	gi|91086179|ref|XP_970981.1| PREDICTED: uncharacterized protein LOC659596 [Tribolium castaneum]	56.6	7e-39
c10977_g1_i1|m.8180	gi|642928156|ref|XP_971553.2| PREDICTED: 39S ribosomal protein L40, mitochondrial [Tribolium castaneum]	65.98	2e-82
c10978_g1_i1|m.8181	gi|91079324|ref|XP_968119.1| PREDICTED: p21-activated protein kinase-interacting protein 1-like [Tribolium castaneum]	57.98	2e-131
c10980_g1_i1|m.8184	gi|91086219|ref|XP_972180.1| PREDICTED: protein FAM192A [Tribolium castaneum]	61.18	2e-90
c10981_g1_i1|m.8185	gi|642926885|ref|XP_972226.3| PREDICTED: merlin [Tribolium castaneum]	86.06	0
c10982_g1_i1|m.8187	gi|642913204|ref|XP_008201435.1| PREDICTED: uncharacterized protein LOC103315182 [Tribolium castaneum]	27.76	2e-14
c10983_g1_i1|m.8188	gi|642917878|ref|XP_008191367.1| PREDICTED: probable galactose-1-phosphate uridylyltransferase [Tribolium castaneum]	67.54	4e-92
c10987_g1_i2|m.8197	gi|642910771|ref|XP_008193403.1| PREDICTED: rho GTPase-activating protein 18 [Tribolium castaneum]	63.64	0
c10989_g1_i2|m.8200	gi|189240901|ref|XP_966398.2| PREDICTED: BTB/POZ domain-containing protein KCTD9 [Tribolium castaneum]	74.81	0
c10990_g1_i1|m.8201	gi|91084649|ref|XP_966904.1| PREDICTED: spermidine synthase [Tribolium castaneum]	67.48	4e-143
c10991_g1_i1|m.8202	gi|642925731|ref|XP_008201510.1| PREDICTED: snRNA-activating protein complex subunit 1-like [Tribolium castaneum]	28.57	9e-28
c10991_g1_i2|m.8205	gi|91084639|ref|XP_966468.1| PREDICTED: synaptobrevin-1 [Tribolium castaneum]	85.19	3e-41
c10992_g1_i1|m.8206	gi|189235837|ref|XP_967852.2| PREDICTED: transmembrane protein 104 homolog [Tribolium castaneum]	60.17	0
c10993_g1_i1|m.8207	gi|642910650|ref|XP_968863.2| PREDICTED: protein hook [Tribolium castaneum]	55.78	0
c10994_g1_i1|m.8208	gi|91077894|ref|XP_973141.1| PREDICTED: protein farnesyltransferase/geranylgeranyltransferase type-1 subunit alpha [Tribolium castaneum]	68.54	6e-163
c10996_g1_i2|m.8210	gi|642920015|ref|XP_008192168.1| PREDICTED: nuclear pore complex protein Nup50 [Tribolium castaneum]	49.2	2e-131
c10997_g1_i5|m.8219	gi|642911471|ref|XP_008199437.1| PREDICTED: LOW QUALITY PROTEIN: dihydropyrimidinase [Tribolium castaneum]	75.87	0
c10998_g1_i1|m.8221	gi|189241799|ref|XP_970228.2| PREDICTED: inverted formin-2 [Tribolium castaneum]	60.87	0
c10999_g1_i1|m.8222	gi|642912276|ref|XP_008200634.1| PREDICTED: exportin-7 isoform X2 [Tribolium castaneum]	93.99	0
c10999_g1_i3|m.8224	gi|642912274|ref|XP_008200633.1| PREDICTED: exportin-7 isoform X1 [Tribolium castaneum]	93.86	0
c11000_g2_i1|m.8225	gi|225543476|ref|NP_001139385.1| ventral vein lacking [Tribolium castaneum]	91.22	0
c11001_g1_i1|m.8227	gi|642937288|ref|XP_008198772.1| PREDICTED: xaa-Pro aminopeptidase 1-like [Tribolium castaneum]	47.47	0
c11002_g1_i1|m.8228	gi|91082577|ref|XP_966896.1| PREDICTED: U3 small nucleolar RNA-interacting protein 2 [Tribolium castaneum]	54	3e-170
c11003_g1_i1|m.8229	gi|642923758|ref|XP_008193872.1| PREDICTED: activating signal cointegrator 1 complex subunit 1-like [Tribolium castaneum]	47.31	2e-110
c11004_g1_i1|m.8230	gi|642923323|ref|XP_001814851.2| PREDICTED: transport and Golgi organization protein 6 [Tribolium castaneum]	49.7	5e-156
c11005_g1_i2|m.8232	gi|642931932|ref|XP_973544.3| PREDICTED: structural maintenance of chromosomes protein 6 [Tribolium castaneum]	47.53	2e-165
c11007_g1_i1|m.8234	gi|91080649|ref|XP_974556.1| PREDICTED: E3 ubiquitin-protein ligase TRIM9 [Tribolium castaneum]	85.55	0
c11008_g1_i1|m.8235	gi|642928387|ref|XP_008192723.1| PREDICTED: dihydrolipoyllysine-residue succinyltransferase component of 2-oxoglutarate dehydrogenase complex, mitochondrial [Tribolium castaneum]	63.15	0
c11009_g1_i1|m.8236	gi|189238253|ref|XP_001813297.1| PREDICTED: GPN-loop GTPase 3 [Tribolium castaneum]	71.9	5e-150
c11010_g1_i1|m.8237	gi|91093162|ref|XP_967461.1| PREDICTED: nucleolar complex protein 4 homolog B [Tribolium castaneum]	67.27	0
c11011_g1_i2|m.8240	gi|642928256|ref|XP_969055.2| PREDICTED: NAD-dependent protein deacetylase sirtuin-2 [Tribolium castaneum]	69.44	3e-175
c11012_g1_i2|m.8242	gi|642911826|ref|XP_008200761.1| PREDICTED: dnaJ protein homolog 1 [Tribolium castaneum]	82.87	0
c11017_g1_i2|m.8253	gi|642927913|ref|XP_008195445.1| PREDICTED: tRNA selenocysteine 1-associated protein 1 isoform X1 [Tribolium castaneum]	79.93	6e-173
c11018_g1_i1|m.8255	gi|642916524|ref|XP_008191078.1| PREDICTED: eukaryotic translation initiation factor 5B-like [Tribolium castaneum]	39.02	9e-40
c11019_g1_i1|m.8256	gi|642917916|ref|XP_008191381.1| PREDICTED: methyltransferase-like protein 17, mitochondrial [Tribolium castaneum]	52.04	6e-163
c11021_g1_i1|m.8259	gi|642913158|ref|XP_975007.2| PREDICTED: glycerol-3-phosphate dehydrogenase [NAD(+)], cytoplasmic isoform X2 [Tribolium castaneum]	84.9	0
c11022_g1_i1|m.8261	gi|269995925|ref|NP_001161785.1| yellow-3 [Tribolium castaneum]	50.61	2e-148
c11023_g1_i1|m.8262	gi|642924116|ref|XP_008194013.1| PREDICTED: growth factor receptor-bound protein 14-like isoform X3 [Tribolium castaneum]	77.01	0
c11023_g1_i4|m.8265	gi|642924112|ref|XP_008194010.1| PREDICTED: growth factor receptor-bound protein 14-like isoform X1 [Tribolium castaneum]	76.14	0
c11024_g1_i2|m.8267	gi|91087273|ref|XP_975542.1| PREDICTED: guanine nucleotide-binding protein subunit beta-5 [Tribolium castaneum]	92.59	0
c11025_g1_i1|m.8271	gi|642937783|ref|XP_008198943.1| PREDICTED: cap-specific mRNA (nucleoside-2'-O-)-methyltransferase 2 [Tribolium castaneum]	39.74	2e-139
c11026_g1_i1|m.8273	gi|91086937|ref|XP_972589.1| PREDICTED: uncharacterized protein LOC661332 [Tribolium castaneum]	60.36	2e-66
c11027_g1_i1|m.8274	gi|642925346|ref|XP_008194514.1| PREDICTED: uncharacterized protein LOC100142142 [Tribolium castaneum]	66.04	0
c11029_g1_i1|m.8278	gi|91077984|ref|XP_968658.1| PREDICTED: serine protease 42 [Tribolium castaneum]	61.93	1e-174
c11030_g1_i2|m.8281	gi|642911200|ref|XP_008199577.1| PREDICTED: glucose-6-phosphate 1-epimerase [Tribolium castaneum]	86.33	0
c11031_g1_i1|m.8282	gi|91087123|ref|XP_975206.1| PREDICTED: mRNA export factor [Tribolium castaneum]	86.91	0
c11034_g1_i1|m.8284	gi|189233723|ref|XP_970246.2| PREDICTED: leishmanolysin-like peptidase [Tribolium castaneum]	80.72	0
c11035_g1_i4|m.8289	gi|189233697|ref|XP_966459.2| PREDICTED: uncharacterized protein C17orf59 homolog [Tribolium castaneum]	74.22	5e-129
c11035_g1_i4|m.8290	gi|642911709|ref|XP_001810667.2| PREDICTED: ribonuclease H1 [Tribolium castaneum]	51.61	4e-69
c11037_g1_i1|m.8293	gi|91088781|ref|XP_976139.1| PREDICTED: methylosome protein 50 [Tribolium castaneum]	42.01	3e-79
c11038_g1_i1|m.8294	gi|642913883|ref|XP_975200.2| PREDICTED: forkhead box protein O isoform X1 [Tribolium castaneum]	78.51	0
c11039_g1_i1|m.8295	gi|91095023|ref|XP_970355.1| PREDICTED: inhibin beta chain [Tribolium castaneum]	64.94	0
c11040_g1_i1|m.8296	gi|91092742|ref|XP_973248.1| PREDICTED: 5'-nucleotidase domain-containing protein 1 isoform X2 [Tribolium castaneum]	55.42	7e-161
c11043_g1_i1|m.8304	gi|642921485|ref|XP_966806.2| PREDICTED: uncharacterized protein LOC655197 [Tribolium castaneum]	55.78	0
c11044_g1_i1|m.8306	gi|642928535|ref|XP_008195364.1| PREDICTED: uncharacterized protein LOC103313570 [Tribolium castaneum]	53.64	8e-37
c11044_g1_i1|m.8307	gi|642928552|ref|XP_008195372.1| PREDICTED: protein FAM161A-like [Tribolium castaneum]	65.22	2e-12
c11045_g1_i1|m.8308	gi|642920715|ref|XP_008192533.1| PREDICTED: TATA-box-binding protein isoform X1 [Tribolium castaneum]	68.03	2e-123
c11046_g1_i1|m.8309	gi|91091920|ref|XP_967150.1| PREDICTED: 60S ribosomal export protein NMD3 [Tribolium castaneum]	78.57	0
c11048_g2_i2|m.8311	gi|91081213|ref|XP_975619.1| PREDICTED: proto-oncogene c-Fos isoform X2 [Tribolium castaneum]	63.11	6e-128
c11049_g1_i2|m.8313	gi|91085791|ref|XP_976450.1| PREDICTED: uncharacterized protein LOC663387 [Tribolium castaneum]	49.62	5e-38
c11050_g1_i1|m.8314	gi|91084637|ref|XP_974735.1| PREDICTED: protein FAM188A homolog isoform X1 [Tribolium castaneum]	61.12	0
c11051_g1_i1|m.8315	gi|642926686|ref|XP_008194968.1| PREDICTED: optomotor-blind protein [Tribolium castaneum]	85.52	0
c11053_g1_i1|m.8316	gi|91080581|ref|XP_973561.1| PREDICTED: splicing factor 3A subunit 2 [Tribolium castaneum]	91.14	3e-163
c11054_g1_i3|m.8319	gi|642914904|ref|XP_008190437.1| PREDICTED: aldehyde dehydrogenase 5, mitochondrial-like [Tribolium castaneum]	34.13	5e-107
c11055_g1_i1|m.8320	gi|91078416|ref|XP_974657.1| PREDICTED: 39S ribosomal protein L42, mitochondrial [Tribolium castaneum]	77.42	7e-50
c11055_g1_i1|m.8321	gi|91078414|ref|XP_974638.1| PREDICTED: huntingtin-interacting protein K [Tribolium castaneum]	79.66	5e-62
c11057_g1_i1|m.8322	gi|189236516|ref|XP_975405.2| PREDICTED: leucine-rich repeat-containing protein 58 [Tribolium castaneum]	62.43	2e-157
c11059_g1_i1|m.8326	gi|642924886|ref|XP_008194084.1| PREDICTED: serine/threonine-protein kinase MST4 isoform X2 [Tribolium castaneum]	81.66	0
c11060_g1_i1|m.8327	gi|91094387|ref|XP_971192.1| PREDICTED: DNA polymerase eta [Tribolium castaneum]	50.07	0
c11062_g1_i2|m.8333	gi|91078908|ref|XP_967303.1| PREDICTED: U1 small nuclear ribonucleoprotein 70 kDa [Tribolium castaneum]	91.9	1e-114
c11063_g1_i1|m.8338	gi|642911903|ref|XP_008199015.1| PREDICTED: heat shock factor protein-like isoform X3 [Tribolium castaneum]	38.73	4e-96
c11064_g1_i1|m.8339	gi|91083955|ref|XP_975011.1| PREDICTED: prolactin regulatory element-binding protein isoform X1 [Tribolium castaneum]	67.87	0
c11065_g1_i1|m.8340	gi|642935478|ref|XP_008198026.1| PREDICTED: cystathionine gamma-lyase [Tribolium castaneum]	63.75	0
c11066_g1_i2|m.8344	gi|91081613|ref|XP_966546.1| PREDICTED: protein goliath-like [Tribolium castaneum]	63.11	2e-171
c11067_g1_i1|m.8347	gi|91090696|ref|XP_974756.1| PREDICTED: transmembrane emp24 domain-containing protein A [Tribolium castaneum]	73.62	6e-135
c11068_g1_i1|m.8348	gi|642910965|ref|XP_008193486.1| PREDICTED: leukocyte elastase inhibitor-like [Tribolium castaneum]	50.64	3e-141
c11071_g1_i1|m.8353	gi|642940169|ref|XP_972944.2| PREDICTED: PIN2/TERF1-interacting telomerase inhibitor 1-like, partial [Tribolium castaneum]	53.04	8e-31
c11072_g1_i1|m.8354	gi|91088179|ref|XP_972438.1| PREDICTED: hydroxyacylglutathione hydrolase, mitochondrial [Tribolium castaneum]	69.05	3e-149
c11073_g1_i2|m.8356	gi|91076316|ref|XP_969753.1| PREDICTED: xylulose kinase [Tribolium castaneum]	70.64	0
c11074_g2_i1|m.8357	gi|642929001|ref|XP_008195650.1| PREDICTED: thrombospondin type-1 domain-containing protein 4-like [Tribolium castaneum]	52.15	0
c11075_g1_i1|m.8359	gi|642936015|ref|XP_008198269.1| PREDICTED: histone-lysine N-methyltransferase NSD2 [Tribolium castaneum]	65.92	0
c11076_g1_i1|m.8361	gi|642922261|ref|XP_008193083.1| PREDICTED: leucine-rich repeat and calponin homology domain-containing protein 3 isoform X3 [Tribolium castaneum]	62.38	0
c11077_g1_i1|m.8363	gi|189239223|ref|XP_973572.2| PREDICTED: DAZ-associated protein 2 isoform X1 [Tribolium castaneum]	86.71	1e-62
c11078_g1_i1|m.8364	gi|642910332|ref|XP_008200286.1| PREDICTED: threonylcarbamoyladenosine tRNA methylthiotransferase [Tribolium castaneum]	77.65	0
c11079_g1_i2|m.8366	gi|642927627|ref|XP_008195340.1| PREDICTED: BTB/POZ domain-containing protein 6 isoform X4 [Tribolium castaneum]	90.87	0
c11079_g1_i3|m.8367	gi|642927621|ref|XP_008195337.1| PREDICTED: BTB/POZ domain-containing protein 6 isoform X1 [Tribolium castaneum]	85.92	0
c1108_g1_i1|m.327	gi|642927692|ref|XP_008196560.1| PREDICTED: DNA-directed RNA polymerase I subunit RPA49-like [Tribolium castaneum]	42.55	5e-86
c11080_g1_i2|m.8369	gi|91092984|ref|XP_967771.1| PREDICTED: programmed cell death protein 5 [Tribolium castaneum]	78.29	2e-65
c11081_g1_i1|m.8370	gi|642918835|ref|XP_008191606.1| PREDICTED: DENN domain-containing protein 5B [Tribolium castaneum]	76.65	0
c11083_g1_i1|m.8374	gi|642911665|ref|XP_969599.2| PREDICTED: uncharacterized protein C45G9.7 [Tribolium castaneum]	92.44	2e-80
c11084_g1_i1|m.8375	gi|91078160|ref|XP_966365.1| PREDICTED: UPF0415 protein C7orf25 homolog [Tribolium castaneum]	61.48	4e-168
c11085_g1_i1|m.8377	gi|189238464|ref|XP_966906.2| PREDICTED: peptidylprolyl isomerase domain and WD repeat-containing protein 1 [Tribolium castaneum]	74.75	0
c11086_g1_i1|m.8379	gi|642929686|ref|XP_008195936.1| PREDICTED: uncharacterized protein LOC103313713 isoform X1 [Tribolium castaneum]	64.19	2e-179
c11088_g1_i2|m.8383	gi|642925692|ref|XP_008194672.1| PREDICTED: ATP-binding cassette sub-family B member 6, mitochondrial isoform X1 [Tribolium castaneum]	72.56	0
c11089_g1_i1|m.8384	gi|91091060|ref|XP_966576.1| PREDICTED: cytochrome c-type heme lyase [Tribolium castaneum]	69.29	6e-131
c11090_g1_i1|m.8385	gi|91076314|ref|XP_969681.1| PREDICTED: splicing factor 3A subunit 1 isoform X1 [Tribolium castaneum]	79.53	0
c11092_g1_i3|m.8387	gi|91083995|ref|XP_975252.1| PREDICTED: E3 ubiquitin-protein ligase MARCH8 [Tribolium castaneum]	60.82	7e-135
c11093_g1_i1|m.8389	gi|642928962|ref|XP_008195635.1| PREDICTED: aprataxin and PNK-like factor [Tribolium castaneum]	37.98	3e-72
c11094_g1_i1|m.8391	gi|642937614|ref|XP_008199122.1| PREDICTED: LOW QUALITY PROTEIN: E3 ubiquitin-protein ligase HERC2 [Tribolium castaneum]	80.83	0
c11095_g1_i1|m.8394	gi|642923964|ref|XP_008193942.1| PREDICTED: neural Wiskott-Aldrich syndrome protein [Tribolium castaneum]	48.88	2e-122
c11096_g1_i1|m.8395	gi|642916360|ref|XP_008190988.1| PREDICTED: protein disulfide-isomerase [Tribolium castaneum]	69.62	1e-167
c11096_g1_i1|m.8396	gi|189235321|ref|XP_975176.2| PREDICTED: methyltransferase-like protein 22 [Tribolium castaneum]	57.04	2e-96
c11097_g3_i1|m.8398	gi|91076108|ref|XP_968944.1| PREDICTED: exostosin-1 [Tribolium castaneum]	77.22	0
c11098_g1_i1|m.8399	gi|91082073|ref|XP_966419.1| PREDICTED: 26S proteasome non-ATPase regulatory subunit 1 [Tribolium castaneum]	85.85	0
c11099_g1_i1|m.8400	gi|91087165|ref|XP_975370.1| PREDICTED: protein max isoform X3 [Tribolium castaneum]	78.44	2e-86
c111_g1_i1|m.37	gi|642912013|ref|XP_008199060.1| PREDICTED: uncharacterized protein LOC103314519 [Tribolium castaneum]	57.84	7e-92
c11101_g1_i1|m.8402	gi|91091108|ref|XP_969067.1| PREDICTED: transcription initiation factor IIA subunit 1 [Tribolium castaneum]	61.54	2e-106
c11102_g1_i1|m.8403	gi|91084301|ref|XP_971859.1| PREDICTED: structure-specific endonuclease subunit slx1 [Tribolium castaneum]	59.57	2e-102
c11103_g1_i1|m.8404	gi|642936487|ref|XP_008198457.1| PREDICTED: glutamate receptor ionotropic, kainate 3-like isoform X1 [Tribolium castaneum]	44.47	0
c11104_g1_i2|m.8406	gi|642917373|ref|XP_001806886.2| PREDICTED: N-alpha-acetyltransferase 10 [Tribolium castaneum]	93.45	1e-116
c11105_g1_i1|m.8407	gi|642936096|ref|XP_008198301.1| PREDICTED: PR domain zinc finger protein 10-like isoform X2 [Tribolium castaneum]	52.44	0
c11106_g1_i1|m.8408	gi|91083759|ref|XP_971689.1| PREDICTED: translocation protein SEC63 homolog [Tribolium castaneum]	74.4	0
c11107_g1_i1|m.8409	gi|91081587|ref|XP_975337.1| PREDICTED: programmed cell death protein 2 [Tribolium castaneum]	56.23	2e-132
c1111_g1_i1|m.329	gi|642916221|ref|XP_008190936.1| PREDICTED: cytochrome P450 CYP12A2-like [Tribolium castaneum]	57.11	0
c11111_g1_i1|m.8419	gi|642911720|ref|XP_971006.2| PREDICTED: polycomb group RING finger protein 3 [Tribolium castaneum]	94.69	7e-161
c11112_g1_i2|m.8421	gi|642913023|ref|XP_008201355.1| PREDICTED: vacuolar protein sorting-associated protein 72 homolog [Tribolium castaneum]	60.66	2e-111
c11113_g1_i1|m.8422	gi|642913372|ref|XP_008195444.1| PREDICTED: protein SHQ1 homolog [Tribolium castaneum]	56.15	1e-153
c11114_g1_i1|m.8423	gi|91090504|ref|XP_975968.1| PREDICTED: ribonuclease Oy [Tribolium castaneum]	43.33	1e-74
c11115_g1_i1|m.8424	gi|91086121|ref|XP_968297.1| PREDICTED: adenine phosphoribosyltransferase [Tribolium castaneum]	54.75	3e-64
c11116_g1_i1|m.8425	gi|91088979|ref|XP_966749.1| PREDICTED: macoilin isoform X2 [Tribolium castaneum]	74.45	0
c11117_g1_i1|m.8426	gi|642936612|ref|XP_008198506.1| PREDICTED: uncharacterized protein LOC661523 isoform X2 [Tribolium castaneum]	38.54	2e-81
c11118_g1_i1|m.8427	gi|91083421|ref|XP_969043.1| PREDICTED: 26S proteasome non-ATPase regulatory subunit 7 [Tribolium castaneum]	93.4	0
c11119_g1_i1|m.8429	gi|91077594|ref|XP_973353.1| PREDICTED: 39S ribosomal protein L32, mitochondrial [Tribolium castaneum]	64.36	2e-75
c11119_g1_i2|m.8430	gi|91077592|ref|XP_973319.1| PREDICTED: decaprenyl-diphosphate synthase subunit 1 [Tribolium castaneum]	76.51	0
c11122_g1_i1|m.8434	gi|91090232|ref|XP_968695.1| PREDICTED: vacuolar protein sorting-associated protein 51 homolog [Tribolium castaneum]	78.7	0
c11124_g1_i1|m.8437	gi|91079000|ref|XP_974711.1| PREDICTED: zinc transporter ZIP1 [Tribolium castaneum]	53.42	4e-108
c11124_g2_i1|m.8438	gi|91078996|ref|XP_974675.1| PREDICTED: zinc transporter ZIP1 [Tribolium castaneum]	69.65	4e-173
c11126_g1_i2|m.8444	gi|642921884|ref|XP_967663.2| PREDICTED: conserved oligomeric Golgi complex subunit 5 [Tribolium castaneum]	67.07	0
c11128_g2_i2|m.8449	gi|642928766|ref|XP_008195552.1| PREDICTED: adipokinetic hormone receptor isoform X1 [Tribolium castaneum]	67.9	3e-178
c11130_g1_i2|m.8454	gi|642930100|ref|XP_008196251.1| PREDICTED: putative epidermal cell surface receptor isoform X2 [Tribolium castaneum]	63.58	0
c11131_g2_i1|m.8457	gi|189239598|ref|XP_967831.2| PREDICTED: CAAX prenyl protease 2 [Tribolium castaneum]	64.11	9e-139
c11131_g2_i2|m.8459	gi|642930110|ref|XP_008196256.1| PREDICTED: F-box only protein 11 [Tribolium castaneum]	94.03	0
c11132_g2_i3|m.8462	gi|642923254|ref|XP_008193679.1| PREDICTED: DNA repair protein XRCC3-like isoform X1 [Tribolium castaneum]	49.03	4e-96
c11133_g1_i3|m.8465	gi|642937412|ref|XP_008198826.1| PREDICTED: putative 1-acyl-sn-glycerol-3-phosphate acyltransferase acl-2 [Tribolium castaneum]	59.45	2e-112
c11134_g1_i2|m.8467	gi|642931916|ref|XP_008196779.1| PREDICTED: inositol polyphosphate multikinase [Tribolium castaneum]	47.79	9e-137
c11135_g1_i1|m.8468	gi|91075966|ref|XP_969306.1| PREDICTED: electron transfer flavoprotein subunit alpha, mitochondrial [Tribolium castaneum]	79.82	0
c11136_g1_i2|m.8470	gi|642919931|ref|XP_974732.3| PREDICTED: tetratricopeptide repeat protein 5-like [Tribolium castaneum]	66.9	0
c11136_g1_i2|m.8471	gi|642919631|ref|XP_008191998.1| PREDICTED: torso-like protein isoform X1 [Tribolium castaneum]	67.82	2e-180
c11137_g1_i2|m.8474	gi|642919913|ref|XP_008192122.1| PREDICTED: transcription factor SOX-13 [Tribolium castaneum]	68.29	0
c11140_g1_i2|m.8478	gi|91083901|ref|XP_974528.1| PREDICTED: ubiquinone biosynthesis protein COQ7 homolog [Tribolium castaneum]	78.09	4e-104
c11142_g1_i1|m.8481	gi|91080935|ref|XP_974194.1| PREDICTED: CD9 antigen [Tribolium castaneum]	62.1	6e-121
c11143_g1_i1|m.8482	gi|91086897|ref|XP_970798.1| PREDICTED: kxDL motif-containing protein CG10681 [Tribolium castaneum]	85.29	2e-84
c11145_g1_i2|m.8485	gi|189240168|ref|XP_975071.2| PREDICTED: sialin [Tribolium castaneum]	57.29	0
c11146_g1_i1|m.8486	gi|642940140|ref|XP_008192185.1| PREDICTED: uncharacterized protein LOC103312673 [Tribolium castaneum]	31.9	7e-11
c11147_g1_i1|m.8487	gi|91094449|ref|XP_966613.1| PREDICTED: 8-oxo-dGDP phosphatase NUDT18 [Tribolium castaneum]	65.57	1e-85
c11148_g1_i1|m.8491	gi|283046736|ref|NP_001164315.1| NADH:ubiquinone reductase 23kD subunit [Tribolium castaneum]	78.3	1e-119
c11149_g1_i1|m.8492	gi|91088121|ref|XP_970262.1| PREDICTED: ADP-ribose pyrophosphatase, mitochondrial [Tribolium castaneum]	63.31	2e-129
c11150_g1_i1|m.8493	gi|91092392|ref|XP_968781.1| PREDICTED: methylthioribulose-1-phosphate dehydratase [Tribolium castaneum]	83.57	3e-137
c11151_g2_i3|m.8495	gi|642930306|ref|XP_008196339.1| PREDICTED: potassium/sodium hyperpolarization-activated cyclic nucleotide-gated channel 2 isoform X5 [Tribolium castaneum]	95.61	0
c11152_g1_i1|m.8496	gi|91087793|ref|XP_967090.1| PREDICTED: cartilage oligomeric matrix protein [Tribolium castaneum]	50.29	0
c11153_g1_i1|m.8497	gi|642918516|ref|XP_008191506.1| PREDICTED: angiopoietin-4 [Tribolium castaneum]	75.14	0
c11154_g1_i1|m.8498	gi|189239303|ref|XP_971702.2| PREDICTED: transmembrane protein 222 [Tribolium castaneum]	68.75	3e-84
c11155_g1_i1|m.8499	gi|91081125|ref|XP_975535.1| PREDICTED: protein YIPF6 [Tribolium castaneum]	80.09	2e-135
c11156_g1_i1|m.8500	gi|91094999|ref|XP_969232.1| PREDICTED: UDP-glucuronic acid decarboxylase 1 isoform X2 [Tribolium castaneum]	75.8	0
c11157_g1_i1|m.8501	gi|642932314|ref|XP_008197061.1| PREDICTED: ankyrin repeat and SAM domain-containing protein 4B [Tribolium castaneum]	65.9	0
c11159_g1_i1|m.8504	gi|642930359|ref|XP_008196365.1| PREDICTED: protein DEK isoform X1 [Tribolium castaneum]	58.44	8e-131
c11160_g2_i1|m.8505	gi|91083003|ref|XP_974477.1| PREDICTED: selT-like protein [Tribolium castaneum]	70.47	2e-102
c11162_g1_i1|m.8507	gi|642918296|ref|XP_008191447.1| PREDICTED: L-lactate dehydrogenase isoform X2 [Tribolium castaneum]	73.17	1e-177
c11164_g1_i1|m.8509	gi|91083597|ref|XP_968968.1| PREDICTED: Golgi reassembly-stacking protein 2 [Tribolium castaneum]	55.2	7e-141
c11166_g1_i2|m.8512	gi|91092244|ref|XP_971492.1| PREDICTED: E3 ubiquitin-protein ligase Siah1-like isoform X2 [Tribolium castaneum]	90.71	0
c11167_g1_i1|m.8513	gi|189237651|ref|XP_001813448.1| PREDICTED: N-acetylneuraminate lyase-like [Tribolium castaneum]	55.37	3e-118
c11168_g1_i2|m.8518	gi|91085389|ref|XP_966562.1| PREDICTED: solute carrier family 35 member G1 [Tribolium castaneum]	80.41	0
c11168_g1_i2|m.8519	gi|91085387|ref|XP_966471.1| PREDICTED: polymerase delta-interacting protein 2 [Tribolium castaneum]	82.23	0
c11169_g1_i1|m.8523	gi|642916207|ref|XP_008190930.1| PREDICTED: transcriptional repressor CTCF [Tribolium castaneum]	77.36	0
c11170_g2_i1|m.8524	gi|642915122|ref|XP_008190418.1| PREDICTED: uncharacterized protein LOC103312186 [Tribolium castaneum]	44.93	8e-162
c11171_g1_i2|m.8527	gi|642911748|ref|XP_008200725.1| PREDICTED: LOW QUALITY PROTEIN: 14-3-3 protein zeta [Tribolium castaneum]	94.35	1e-170
c11172_g1_i1|m.8528	gi|91077286|ref|XP_974471.1| PREDICTED: probable phosphoserine aminotransferase [Tribolium castaneum]	74.38	0
c11173_g1_i1|m.8529	gi|642934148|ref|XP_008199296.1| PREDICTED: general transcription factor IIH subunit 2 [Tribolium castaneum]	73.3	6e-100
c11174_g1_i2|m.8531	gi|189237113|ref|XP_971629.2| PREDICTED: xyloside xylosyltransferase 1 [Tribolium castaneum]	56.61	2e-141
c11175_g1_i1|m.8532	gi|642932001|ref|XP_008196814.1| PREDICTED: zinc finger protein 267-like [Tribolium castaneum]	37.21	2e-80
c11176_g1_i1|m.8533	gi|642924799|ref|XP_008194045.1| PREDICTED: aspartate--tRNA ligase, mitochondrial [Tribolium castaneum]	60.37	0
c11177_g1_i1|m.8534	gi|91093179|ref|XP_968242.1| PREDICTED: COP9 signalosome complex subunit 7b isoform X1 [Tribolium castaneum]	72.12	4e-142
c11177_g1_i2|m.8535	gi|642934095|ref|XP_008196895.1| PREDICTED: COP9 signalosome complex subunit 7b isoform X3 [Tribolium castaneum]	72.35	5e-137
c11180_g1_i1|m.8538	gi|91089391|ref|XP_973919.1| PREDICTED: trehalase [Tribolium castaneum]	51.6	0
c11181_g1_i1|m.8539	gi|642933639|ref|XP_008197506.1| PREDICTED: phosphatidylinositol N-acetylglucosaminyltransferase subunit Q isoform X1 [Tribolium castaneum]	43.91	4e-120
c11182_g1_i1|m.8540	gi|189234193|ref|XP_970277.2| PREDICTED: 1,2-dihydroxy-3-keto-5-methylthiopentene dioxygenase [Tribolium castaneum]	60.89	1e-81
c11183_g1_i1|m.8541	gi|91090962|ref|XP_974635.1| PREDICTED: U4/U6.U5 tri-snRNP-associated protein 1 [Tribolium castaneum]	60.97	0
c11184_g1_i1|m.8543	gi|642936409|ref|XP_008198421.1| PREDICTED: APOPT family protein CG14806, mitochondrial [Tribolium castaneum]	46.15	3e-49
c11186_g1_i1|m.8545	gi|91083559|ref|XP_967044.1| PREDICTED: UPF0568 protein C14orf166 [Tribolium castaneum]	55.51	3e-92
c11188_g1_i1|m.8548	gi|91077746|ref|XP_966706.1| PREDICTED: uncharacterized protein LOC655102 [Tribolium castaneum]	67.61	0
c1119_g1_i1|m.330	gi|91078200|ref|XP_968428.1| PREDICTED: m7GpppN-mRNA hydrolase [Tribolium castaneum]	66.67	5e-159
c11190_g1_i1|m.8550	gi|91079746|ref|XP_970581.1| PREDICTED: transmembrane protein 208 [Tribolium castaneum]	75.73	2e-56
c11191_g1_i1|m.8551	gi|189234829|ref|XP_001811696.1| PREDICTED: protein fem-1 homolog CG6966 isoform X1 [Tribolium castaneum]	82.86	0
c11193_g1_i1|m.8554	gi|91082557|ref|XP_974043.1| PREDICTED: ras-related protein Rab-32 isoform X1 [Tribolium castaneum]	67	1e-132
c11193_g1_i2|m.8555	gi|642922835|ref|XP_008193346.1| PREDICTED: ras-related protein Rab-38 isoform X2 [Tribolium castaneum]	68.42	3e-119
c11194_g1_i1|m.8556	gi|91080781|ref|XP_968744.1| PREDICTED: 40S ribosomal protein S12, mitochondrial [Tribolium castaneum]	66.24	1e-65
c11196_g1_i3|m.8559	gi|189236866|ref|XP_001814181.1| PREDICTED: LIRP [Tribolium castaneum]	40.57	3e-18
c11198_g1_i1|m.8560	gi|642913792|ref|XP_008201162.1| PREDICTED: pre-mRNA-splicing factor 18 [Tribolium castaneum]	71.26	0
c11199_g1_i3|m.8565	gi|189236212|ref|XP_001812169.1| PREDICTED: serine/arginine-rich splicing factor RSZ21 [Tribolium castaneum]	62.74	2e-64
c11202_g1_i1|m.8569	gi|91086287|ref|XP_973437.1| PREDICTED: hydroxymethylglutaryl-CoA synthase 1 [Tribolium castaneum]	69.48	0
c11203_g1_i1|m.8570	gi|642936407|ref|XP_972043.2| PREDICTED: sugar transporter SWEET1 [Tribolium castaneum]	53.36	5e-80
c11205_g1_i1|m.8572	gi|642930329|ref|XP_008196349.1| PREDICTED: proteasome subunit alpha type-5 [Tribolium castaneum]	90.91	1e-166
c11206_g2_i1|m.8573	gi|642935070|ref|XP_008197871.1| PREDICTED: echinoderm microtubule-associated protein-like CG42247 [Tribolium castaneum]	88.66	0
c11207_g1_i1|m.8574	gi|91077730|ref|XP_975099.1| PREDICTED: epoxide hydrolase 4 [Tribolium castaneum]	51.16	1e-144
c11208_g1_i1|m.8575	gi|642912660|ref|XP_008200953.1| PREDICTED: aldose reductase-like [Tribolium castaneum]	64.05	6e-154
c11210_g2_i1|m.8577	gi|91083247|ref|XP_973990.1| PREDICTED: GDP-fucose protein O-fucosyltransferase 1 [Tribolium castaneum]	71.47	1e-171
c11211_g1_i1|m.8578	gi|91087269|ref|XP_975538.1| PREDICTED: acyl-CoA synthetase family member 3, mitochondrial [Tribolium castaneum]	53.21	0
c11212_g1_i1|m.8579	gi|91088131|ref|XP_975884.1| PREDICTED: cytochrome b5-related protein [Tribolium castaneum]	60.96	0
c11213_g1_i1|m.8581	gi|642921099|ref|XP_008192690.1| PREDICTED: toll-interacting protein isoform X2 [Tribolium castaneum]	71.06	2e-139
c11214_g2_i2|m.8585	gi|642936125|ref|XP_008198310.1| PREDICTED: ubiquitin thioesterase trabid [Tribolium castaneum]	78.14	0
c11216_g1_i1|m.8588	gi|189235224|ref|XP_967725.2| PREDICTED: coatomer subunit delta [Tribolium castaneum]	81.68	0
c11217_g1_i1|m.8589	gi|91079130|ref|XP_975437.1| PREDICTED: probable serine hydrolase [Tribolium castaneum]	49.53	1e-113
c11218_g1_i1|m.8590	gi|642939462|ref|XP_008200412.1| PREDICTED: inhibitor of nuclear factor kappa-B kinase subunit beta-like isoform X1 [Tribolium castaneum]	37.24	3e-134
c11219_g1_i2|m.8592	gi|642934420|ref|XP_008197654.1| PREDICTED: transformer-2 protein homolog beta isoform X5 [Tribolium castaneum]	77.6	3e-83
c11219_g1_i3|m.8593	gi|642934414|ref|XP_008197651.1| PREDICTED: transformer-2 protein homolog beta isoform X2 [Tribolium castaneum]	90.08	6e-76
c11220_g1_i1|m.8596	gi|642916496|ref|XP_008191066.1| PREDICTED: elongation factor Tu GTP-binding domain-containing protein 1 [Tribolium castaneum]	38.32	0
c11221_g1_i2|m.8600	gi|642914286|ref|XP_008201622.1| PREDICTED: CCR4-NOT transcription complex subunit 6-like isoform X2 [Tribolium castaneum]	83.24	0
c11222_g1_i1|m.8602	gi|642936658|ref|XP_973680.2| PREDICTED: LOW QUALITY PROTEIN: uncharacterized protein LOC662495 [Tribolium castaneum]	47.48	2e-96
c11223_g1_i1|m.8605	gi|91091516|ref|XP_969603.1| PREDICTED: DNA replication licensing factor Mcm6 [Tribolium castaneum]	84.08	0
c11224_g1_i2|m.8609	gi|91085145|ref|XP_966691.1| PREDICTED: choline/ethanolamine kinase [Tribolium castaneum]	66.11	2e-176
c11225_g1_i1|m.8610	gi|91082969|ref|XP_973818.1| PREDICTED: ubiquitin-conjugating enzyme E2 J2 [Tribolium castaneum]	70.67	3e-122
c11227_g1_i1|m.8611	gi|91082651|ref|XP_970662.1| PREDICTED: GTP-binding protein Rheb [Tribolium castaneum]	76.37	2e-102
c11228_g1_i1|m.8613	gi|91088697|ref|XP_975033.1| PREDICTED: uncharacterized protein LOC663911 [Tribolium castaneum]	27.9	1e-33
c11229_g1_i1|m.8614	gi|91085773|ref|XP_974282.1| PREDICTED: uncharacterized protein LOC663129 [Tribolium castaneum]	74.94	0
c11230_g1_i1|m.8615	gi|642935689|ref|XP_974835.2| PREDICTED: actin-binding protein IPP [Tribolium castaneum]	63.67	0
c11232_g1_i1|m.8619	gi|642927522|ref|XP_008195302.1| PREDICTED: cysteine-rich protein 2-binding protein [Tribolium castaneum]	55.15	0
c11233_g1_i1|m.8620	gi|642914483|ref|XP_969964.2| PREDICTED: zinc finger protein GLIS2 homolog [Tribolium castaneum]	57.78	1e-124
c11233_g2_i1|m.8621	gi|189234816|ref|XP_969892.2| PREDICTED: probable nucleoporin Nup54 [Tribolium castaneum]	51.89	0
c11234_g1_i2|m.8626	gi|642935919|ref|XP_008198229.1| PREDICTED: dual specificity protein phosphatase Mpk3 isoform X2 [Tribolium castaneum]	79.77	0
c11235_g1_i1|m.8629	gi|91093044|ref|XP_966517.1| PREDICTED: lysosomal aspartic protease [Tribolium castaneum]	77.57	0
c11238_g1_i1|m.8633	gi|642939323|ref|XP_969087.2| PREDICTED: aminoacyl tRNA synthase complex-interacting multifunctional protein 1 isoform X1 [Tribolium castaneum]	57.63	4e-112
c11239_g1_i1|m.8635	gi|91092640|ref|XP_969145.1| PREDICTED: lysine-specific demethylase 7B [Tribolium castaneum]	66.13	0
c11240_g1_i1|m.8636	gi|642927406|ref|XP_008195260.1| PREDICTED: uncharacterized protein LOC103313544 [Tribolium castaneum]	30.71	2e-13
c11241_g1_i1|m.8637	gi|642923427|ref|XP_008193740.1| PREDICTED: alpha-tocopherol transfer protein-like isoform X2 [Tribolium castaneum]	69.54	4e-164
c11242_g1_i1|m.8638	gi|642933498|ref|XP_008197442.1| PREDICTED: rho GTPase-activating protein 20-like isoform X1 [Tribolium castaneum]	78.79	0
c11243_g1_i1|m.8639	gi|642920703|ref|XP_008192529.1| PREDICTED: beta-taxilin-like isoform X2 [Tribolium castaneum]	35.92	2e-15
c11244_g1_i1|m.8640	gi|642929233|ref|XP_008195746.1| PREDICTED: claspin homolog [Tribolium castaneum]	40.81	2e-109
c11245_g1_i1|m.8642	gi|91083703|ref|XP_969630.1| PREDICTED: monocarboxylate transporter 5 [Tribolium castaneum]	62.69	0
c11247_g1_i1|m.8644	gi|91082001|ref|XP_969328.1| PREDICTED: vacuolar protein sorting-associated protein 37A [Tribolium castaneum]	56.64	2e-126
c11248_g1_i1|m.8645	gi|642932785|ref|XP_008196984.1| PREDICTED: dual 3',5'-cyclic-AMP and -GMP phosphodiesterase 11 isoform X3 [Tribolium castaneum]	84.16	0
c11248_g1_i2|m.8646	gi|642932773|ref|XP_008196977.1| PREDICTED: dual 3',5'-cyclic-AMP and -GMP phosphodiesterase 11 isoform X1 [Tribolium castaneum]	83.47	0
c11250_g1_i1|m.8648	gi|91076900|ref|XP_975025.1| PREDICTED: Y+L amino acid transporter 2 [Tribolium castaneum]	75.17	0
c11251_g1_i1|m.8649	gi|642919175|ref|XP_967659.3| PREDICTED: 39S ribosomal protein L14, mitochondrial [Tribolium castaneum]	80	1e-78
c11252_g1_i1|m.8650	gi|642924592|ref|XP_008194355.1| PREDICTED: growth hormone-inducible transmembrane protein [Tribolium castaneum]	70.15	3e-163
c11253_g1_i2|m.8652	gi|255522809|ref|NP_001157317.1| longitudinals lacking isoform 8 [Tribolium castaneum]	72.64	0
c11254_g1_i1|m.8653	gi|642927700|ref|XP_008196611.1| PREDICTED: LOW QUALITY PROTEIN: oxidative stress-induced growth inhibitor 2-like [Tribolium castaneum]	49.76	0
c11255_g1_i1|m.8657	gi|642929021|ref|XP_008195658.1| PREDICTED: RNA-binding protein Nova-1 isoform X1 [Tribolium castaneum]	85.66	0
c11256_g1_i1|m.8658	gi|91091908|ref|XP_966621.1| PREDICTED: ribosome production factor 2 homolog [Tribolium castaneum]	69.02	2e-155
c11257_g1_i1|m.8660	gi|91077428|ref|XP_975436.1| PREDICTED: tRNA (adenine(58)-N(1))-methyltransferase catalytic subunit TRMT61A [Tribolium castaneum]	72.44	3e-174
c11259_g1_i1|m.8661	gi|91090688|ref|XP_974634.1| PREDICTED: ribonuclease P/MRP protein subunit POP5 [Tribolium castaneum]	47.68	4e-48
c11259_g2_i2|m.8665	gi|91090686|ref|XP_974615.1| PREDICTED: FGGY carbohydrate kinase domain-containing protein [Tribolium castaneum]	70.72	3e-176
c11259_g2_i2|m.8667	gi|642935667|ref|XP_008198106.1| PREDICTED: uncharacterized protein LOC103314278 [Tribolium castaneum]	37.01	2e-11
c11261_g1_i2|m.8670	gi|642913071|ref|XP_008201377.1| PREDICTED: disks large 1 tumor suppressor protein isoform X1 [Tribolium castaneum]	86.5	0
c11261_g1_i6|m.8676	gi|642913079|ref|XP_008201381.1| PREDICTED: disks large 1 tumor suppressor protein isoform X5 [Tribolium castaneum]	87.79	0
c11262_g1_i1|m.8679	gi|642911714|ref|XP_008200711.1| PREDICTED: LOW QUALITY PROTEIN: dihydropteridine reductase [Tribolium castaneum]	74.12	6e-114
c11263_g1_i1|m.8680	gi|91093675|ref|XP_969585.1| PREDICTED: traB domain-containing protein [Tribolium castaneum]	60.64	3e-167
c11264_g1_i1|m.8681	gi|91081971|ref|XP_967978.1| PREDICTED: plexin domain-containing protein 2 [Tribolium castaneum]	47.87	0
c11265_g1_i1|m.8682	gi|91085199|ref|XP_971915.1| PREDICTED: vacuolar protein sorting-associated protein 37B [Tribolium castaneum]	55.79	2e-89
c11266_g1_i1|m.8684	gi|91082921|ref|XP_972710.1| PREDICTED: annulin [Tribolium castaneum]	66.35	0
c11267_g1_i3|m.8686	gi|642911949|ref|XP_008199034.1| PREDICTED: phospholipid scramblase 2 isoform X2 [Tribolium castaneum]	86.75	7e-156
c11268_g1_i1|m.8687	gi|642925318|ref|XP_008194505.1| PREDICTED: microtubule-associated proteins 1A/1B light chain 3C-like [Tribolium castaneum]	71.96	3e-53
c11270_g1_i2|m.8693	gi|91076698|ref|XP_971949.1| PREDICTED: dipeptidyl peptidase 9 [Tribolium castaneum]	85.11	0
c11271_g1_i2|m.8696	gi|642933293|ref|XP_968154.2| PREDICTED: putative ribosomal RNA methyltransferase CG11447 [Tribolium castaneum]	67.76	2e-106
c11271_g1_i2|m.8697	gi|91093471|ref|XP_967620.1| PREDICTED: ubiquitin-like protein 4B [Tribolium castaneum]	52.46	1e-47
c11272_g1_i4|m.8700	gi|642920786|ref|XP_008192560.1| PREDICTED: cholinephosphotransferase 1 isoform X3 [Tribolium castaneum]	76.25	0
c11274_g1_i1|m.8701	gi|642918448|ref|XP_008191479.1| PREDICTED: probable deoxyhypusine synthase [Tribolium castaneum]	74.34	0
c11275_g1_i1|m.8702	gi|91083571|ref|XP_967903.1| PREDICTED: bystin [Tribolium castaneum]	71.79	0
c11276_g1_i1|m.8703	gi|91089925|ref|XP_972979.1| PREDICTED: target of rapamycin complex subunit lst8 [Tribolium castaneum]	74.6	2e-178
c11278_g1_i1|m.8707	gi|91088885|ref|XP_972389.1| PREDICTED: 26S protease regulatory subunit 7 [Tribolium castaneum]	97.7	0
c11279_g1_i1|m.8709	gi|91084847|ref|XP_967178.1| PREDICTED: uncharacterized protein LOC655532 isoform X2 [Tribolium castaneum]	43.34	4e-59
c11280_g1_i1|m.8710	gi|642915135|ref|XP_008190425.1| PREDICTED: importin-11-like [Tribolium castaneum]	68.78	0
c11281_g1_i1|m.8711	gi|642915024|ref|XP_008190488.1| PREDICTED: LOW QUALITY PROTEIN: tyrosine-protein phosphatase non-receptor type 9-like [Tribolium castaneum]	79.37	0
c11282_g1_i2|m.8714	gi|91087581|ref|XP_971751.1| PREDICTED: peroxisomal membrane protein PMP34 [Tribolium castaneum]	58.1	1e-116
c11284_g1_i1|m.8715	gi|282158081|ref|NP_001164084.1| arrestin 2 [Tribolium castaneum]	73.1	0
c11285_g1_i1|m.8716	gi|642923240|ref|XP_008193671.1| PREDICTED: uncharacterized protein DDB_G0283697-like isoform X2 [Tribolium castaneum]	34.59	2e-28
c11286_g1_i2|m.8720	gi|642920145|ref|XP_975475.2| PREDICTED: zinc transporter 9 isoform X1 [Tribolium castaneum]	79.26	0
c11287_g1_i1|m.8725	gi|189235713|ref|XP_968592.2| PREDICTED: uncharacterized protein LOC657010 [Tribolium castaneum]	76.34	2e-138
c11288_g1_i1|m.8726	gi|189234234|ref|XP_973284.2| PREDICTED: phosphatidylserine decarboxylase proenzyme isoform X2 [Tribolium castaneum]	64.31	6e-171
c11289_g1_i1|m.8727	gi|642925857|ref|XP_008190580.1| PREDICTED: venom acid phosphatase Acph-1 [Tribolium castaneum]	49.24	2e-142
c11290_g1_i1|m.8729	gi|91094297|ref|XP_971720.1| PREDICTED: estradiol 17-beta-dehydrogenase 12 [Tribolium castaneum]	57.33	7e-134
c11292_g1_i1|m.8731	gi|189234289|ref|XP_970161.2| PREDICTED: mitochondrial pyruvate carrier 2-like [Tribolium castaneum]	70.09	1e-56
c11293_g1_i1|m.8732	gi|642936649|ref|XP_008198523.1| PREDICTED: 3-oxoacyl-[acyl-carrier-protein] synthase, mitochondrial [Tribolium castaneum]	69.86	0
c11295_g1_i1|m.8733	gi|91080441|ref|XP_969036.1| PREDICTED: uncharacterized protein LOC657485 [Tribolium castaneum]	80.99	3e-149
c11296_g1_i1|m.8734	gi|449083364|ref|NP_001263355.1| dehydrogenase/reductase SDR family member 4 [Tribolium castaneum]	65.87	4e-116
c11296_g1_i1|m.8735	gi|642915571|ref|XP_008190671.1| PREDICTED: TP53-regulating kinase [Tribolium castaneum]	60	6e-98
c11297_g1_i1|m.8736	gi|642927957|ref|XP_008195462.1| PREDICTED: transcriptional adapter 2B [Tribolium castaneum]	66.3	0
c11298_g1_i1|m.8739	gi|642922646|ref|XP_971397.2| PREDICTED: Krueppel-like factor 11 [Tribolium castaneum]	56.79	3e-115
c11299_g1_i2|m.8741	gi|642916682|ref|XP_008192144.1| PREDICTED: protein tramtrack, alpha isoform isoform X2 [Tribolium castaneum]	73.72	0
c11300_g1_i1|m.8742	gi|642930416|ref|XP_008196392.1| PREDICTED: stAR-related lipid transfer protein 3 [Tribolium castaneum]	60.47	0
c11301_g1_i2|m.8744	gi|189234081|ref|XP_971242.2| PREDICTED: major facilitator superfamily domain-containing protein 10 [Tribolium castaneum]	73.44	0
c11302_g1_i1|m.8745	gi|91078256|ref|XP_970842.1| PREDICTED: importin-7 [Tribolium castaneum]	79.9	0
c11305_g1_i1|m.8750	gi|91078892|ref|XP_973256.1| PREDICTED: enoyl-CoA delta isomerase 2, mitochondrial [Tribolium castaneum]	53.31	1e-86
c11308_g1_i1|m.8754	gi|642939335|ref|XP_008197044.1| PREDICTED: proton-coupled amino acid transporter 1 isoform X1 [Tribolium castaneum]	57.96	0
c11309_g1_i1|m.8756	gi|189237997|ref|XP_001812912.1| PREDICTED: dehydrogenase/reductase SDR family protein 7-like [Tribolium castaneum]	58.31	3e-120
c11310_g1_i1|m.8757	gi|642929621|ref|XP_008195907.1| PREDICTED: extensin-like isoform X1 [Tribolium castaneum]	39.13	1e-24
c11312_g1_i1|m.8760	gi|91084415|ref|XP_967749.1| PREDICTED: macrophage migration inhibitory factor homolog [Tribolium castaneum]	71.43	2e-63
c11313_g1_i1|m.8762	gi|91089719|ref|XP_974982.1| PREDICTED: methyltransferase-like protein 14 homolog [Tribolium castaneum]	86.45	0
c11314_g1_i1|m.8763	gi|642913828|ref|XP_008201177.1| PREDICTED: microtubule-associated protein tau isoform X3 [Tribolium castaneum]	71.01	1e-144
c11314_g1_i2|m.8765	gi|642913826|ref|XP_008201176.1| PREDICTED: microtubule-associated protein tau isoform X2 [Tribolium castaneum]	75.46	9e-142
c11315_g1_i1|m.8767	gi|86515348|ref|NP_001034501.1| extradenticle [Tribolium castaneum]	95.59	0
c11316_g1_i1|m.8768	gi|642922837|ref|XP_008193347.1| PREDICTED: isocitrate dehydrogenase [NAD] subunit gamma, mitochondrial-like isoform X1 [Tribolium castaneum]	81.59	0
c11317_g1_i1|m.8772	gi|91091902|ref|XP_971322.1| PREDICTED: mediator of RNA polymerase II transcription subunit 22 [Tribolium castaneum]	94.29	2e-96
c11318_g1_i1|m.8773	gi|189240504|ref|XP_969860.2| PREDICTED: ras-related protein Rab-40B [Tribolium castaneum]	83.56	0
c11319_g1_i2|m.8774	gi|642928866|ref|XP_008195596.1| PREDICTED: protein EFR3 homolog cmp44E [Tribolium castaneum]	78.43	0
c11321_g1_i1|m.8778	gi|189240075|ref|XP_001812636.1| PREDICTED: protein singed wings 2 [Tribolium castaneum]	48.85	1e-132
c11322_g1_i1|m.8779	gi|91076844|ref|XP_974775.1| PREDICTED: probable enoyl-CoA hydratase, mitochondrial [Tribolium castaneum]	63.7	6e-130
c11323_g1_i1|m.8780	gi|91079024|ref|XP_974902.1| PREDICTED: methyltransferase-like protein 10 [Tribolium castaneum]	51.2	1e-73
c11326_g1_i1|m.8782	gi|642919469|ref|XP_008191882.1| PREDICTED: polyprenol reductase-like isoform X3 [Tribolium castaneum]	46.28	5e-93
c11327_g1_i1|m.8783	gi|642911741|ref|XP_008200721.1| PREDICTED: ubiquilin-1 [Tribolium castaneum]	69.17	0
c11328_g1_i2|m.8785	gi|91083725|ref|XP_967136.1| PREDICTED: actin-binding Rho-activating protein isoform X1 [Tribolium castaneum]	59.76	2e-68
c11329_g1_i1|m.8786	gi|642924396|ref|XP_008194278.1| PREDICTED: mitotic checkpoint serine/threonine-protein kinase BUB1 beta [Tribolium castaneum]	51.54	0
c11330_g1_i1|m.8787	gi|642927404|ref|XP_008195258.1| PREDICTED: cytochrome c oxidase subunit IV isoform X1 [Tribolium castaneum]	64.41	7e-81
c11331_g1_i1|m.8788	gi|91089555|ref|XP_971709.1| PREDICTED: uncharacterized protein LOC660380 [Tribolium castaneum]	51.94	9e-38
c11332_g1_i1|m.8789	gi|642923827|ref|XP_008193896.1| PREDICTED: endonuclease/exonuclease/phosphatase family domain-containing protein 1-like [Tribolium castaneum]	51.81	0
c11333_g1_i2|m.8794	gi|642930209|ref|XP_008196302.1| PREDICTED: monocarboxylate transporter 7-like [Tribolium castaneum]	38.68	2e-107
c11333_g1_i3|m.8795	gi|642930213|ref|XP_008196304.1| PREDICTED: protein aubergine [Tribolium castaneum]	51.88	0
c11335_g1_i1|m.8798	gi|642934158|ref|XP_968636.2| PREDICTED: elongation of very long chain fatty acids protein AAEL008004 isoform X1 [Tribolium castaneum]	82.05	9e-175
c11336_g1_i1|m.8800	gi|642936390|ref|XP_008198416.1| PREDICTED: LOW QUALITY PROTEIN: protein CNPPD1 [Tribolium castaneum]	51.82	2e-132
c11339_g1_i2|m.8807	gi|91076706|ref|XP_972155.1| PREDICTED: peroxisome biogenesis factor 10 isoform X1 [Tribolium castaneum]	53.21	2e-106
c1134_g1_i1|m.333	gi|91094389|ref|XP_971252.1| PREDICTED: DNA polymerase epsilon subunit C [Tribolium castaneum]	61.11	4e-93
c11340_g1_i2|m.8809	gi|91081569|ref|XP_975186.1| PREDICTED: charged multivesicular body protein 2a [Tribolium castaneum]	85.9	6e-119
c11341_g1_i1|m.8810	gi|91086881|ref|XP_970132.1| PREDICTED: RING finger protein 113A [Tribolium castaneum]	70.81	3e-157
c11342_g1_i2|m.8814	gi|91093199|ref|XP_969223.1| PREDICTED: uncharacterized protein LOC657683 [Tribolium castaneum]	45.05	3e-62
c11343_g1_i1|m.8815	gi|642927763|ref|XP_008195396.1| PREDICTED: ATP synthase-coupling factor 6, mitochondrial [Tribolium castaneum]	65.74	1e-49
c11344_g1_i1|m.8816	gi|642911538|ref|XP_008199464.1| PREDICTED: organic cation transporter protein isoform X2 [Tribolium castaneum]	64.24	0
c11345_g1_i2|m.8820	gi|642923984|ref|XP_966730.2| PREDICTED: cysteine and histidine-rich protein 1, partial [Tribolium castaneum]	69.67	0
c11346_g1_i1|m.8825	gi|91079919|ref|XP_967329.1| PREDICTED: sulfhydryl oxidase 2-like [Tribolium castaneum]	54.34	0
c11349_g1_i1|m.8828	gi|642931700|ref|XP_008196693.1| PREDICTED: thymidylate kinase [Tribolium castaneum]	51	2e-58
c11350_g1_i1|m.8829	gi|642927572|ref|XP_008195319.1| PREDICTED: cAMP-dependent protein kinase type II regulatory subunit [Tribolium castaneum]	83.12	0
c11351_g1_i2|m.8831	gi|642939310|ref|XP_008200401.1| PREDICTED: tRNA (guanine(37)-N1)-methyltransferase [Tribolium castaneum]	50.93	1e-144
c11354_g3_i1|m.8836	gi|642917429|ref|XP_008191194.1| PREDICTED: D-2-hydroxyglutarate dehydrogenase, mitochondrial-like isoform X1 [Tribolium castaneum]	59.83	0
c11358_g1_i3|m.8847	gi|91088619|ref|XP_974054.1| PREDICTED: CDP-diacylglycerol--glycerol-3-phosphate 3-phosphatidyltransferase, mitochondrial [Tribolium castaneum]	60.72	0
c11359_g1_i1|m.8848	gi|642928451|ref|XP_972332.2| PREDICTED: UPF0160 protein [Tribolium castaneum]	59.32	5e-167
c11360_g1_i1|m.8849	gi|642928785|ref|XP_008195561.1| PREDICTED: uncharacterized protein LOC654941 isoform X3 [Tribolium castaneum]	37.38	8e-65
c11361_g1_i1|m.8850	gi|91086235|ref|XP_966692.1| PREDICTED: transitional endoplasmic reticulum ATPase TER94 [Tribolium castaneum]	95.52	0
c11362_g1_i1|m.8851	gi|642936851|ref|XP_008197901.1| PREDICTED: ubiquitin-protein ligase E3A [Tribolium castaneum]	66.55	0
c11363_g1_i1|m.8853	gi|91090980|ref|XP_974800.1| PREDICTED: putative mitochondrial inner membrane protein isoform X1 [Tribolium castaneum]	49.62	0
c11364_g1_i1|m.8854	gi|642916102|ref|XP_971729.2| PREDICTED: DDB1- and CUL4-associated factor 11 [Tribolium castaneum]	65.28	0
c11365_g1_i1|m.8855	gi|642912785|ref|XP_008201251.1| PREDICTED: uncharacterized protein LOC663557 isoform X1 [Tribolium castaneum]	78.86	0
c11366_g1_i1|m.8856	gi|91093645|ref|XP_967622.1| PREDICTED: translation initiation factor eIF-2B subunit beta [Tribolium castaneum]	71.01	0
c11368_g1_i1|m.8857	gi|642933135|ref|XP_973578.2| PREDICTED: DNA topoisomerase 3-alpha [Tribolium castaneum]	57.7	0
c11370_g1_i1|m.8859	gi|642919723|ref|XP_008192039.1| PREDICTED: glutaredoxin domain-containing cysteine-rich protein CG12206-like [Tribolium castaneum]	55.81	2e-178
c11372_g1_i1|m.8860	gi|642920753|ref|XP_008192548.1| PREDICTED: probable asparagine--tRNA ligase, mitochondrial [Tribolium castaneum]	52.55	3e-180
c11373_g1_i1|m.8861	gi|642917891|ref|XP_008191372.1| PREDICTED: regulator of chromosome condensation [Tribolium castaneum]	68.76	0
c11375_g1_i2|m.8864	gi|642919435|ref|XP_008191868.1| PREDICTED: uncharacterized protein LOC663349 isoform X2 [Tribolium castaneum]	75.42	0
c11376_g1_i1|m.8865	gi|642918102|ref|XP_008194021.1| PREDICTED: Krueppel-like factor 5 isoform X1 [Tribolium castaneum]	80.1	0
c11377_g1_i1|m.8867	gi|91094261|ref|XP_969516.1| PREDICTED: tonsoku-like protein isoform X1 [Tribolium castaneum]	41.18	0
c11379_g1_i1|m.8869	gi|91091136|ref|XP_970146.1| PREDICTED: uncharacterized protein LOC658689 [Tribolium castaneum]	51.91	3e-96
c11380_g1_i1|m.8870	gi|91083975|ref|XP_975160.1| PREDICTED: 28S ribosomal protein S22, mitochondrial [Tribolium castaneum]	50.72	5e-124
c11381_g1_i2|m.8872	gi|91076148|ref|XP_970492.1| PREDICTED: yorkie homolog isoform X1 [Tribolium castaneum]	72.52	0
c11383_g1_i1|m.8874	gi|189237799|ref|XP_001814012.1| PREDICTED: polypeptide N-acetylgalactosaminyltransferase 35A [Tribolium castaneum]	62.66	0
c11384_g1_i1|m.8875	gi|642932139|ref|XP_008196871.1| PREDICTED: tachykinins [Tribolium castaneum]	59.03	7e-75
c11386_g1_i3|m.8879	gi|642928662|ref|XP_008199726.1| PREDICTED: protein daughterless isoform X3 [Tribolium castaneum]	74.86	0
c11389_g1_i1|m.8882	gi|642913868|ref|XP_008201196.1| PREDICTED: leucine-rich repeat-containing protein C10orf11 isoform X2 [Tribolium castaneum]	74.58	6e-128
c1139_g1_i1|m.338	gi|642918328|ref|XP_008199102.1| PREDICTED: otoferlin-like [Tribolium castaneum]	84.8	6e-174
c11390_g1_i1|m.8883	gi|91084031|ref|XP_966556.1| PREDICTED: WD repeat-containing protein 82 [Tribolium castaneum]	96.52	0
c11391_g1_i1|m.8886	gi|91083431|ref|XP_969550.1| PREDICTED: membrane magnesium transporter 1 [Tribolium castaneum]	77.78	5e-55
c11391_g1_i2|m.8887	gi|91083433|ref|XP_969628.1| PREDICTED: kidney mitochondrial carrier protein 1 [Tribolium castaneum]	78.2	1e-172
c11394_g1_i1|m.8889	gi|642933637|ref|XP_008197505.1| PREDICTED: uncharacterized protein LOC663924 [Tribolium castaneum]	48.98	1e-37
c11395_g1_i1|m.8890	gi|642930204|ref|XP_008196299.1| PREDICTED: uncharacterized protein LOC103313825 [Tribolium castaneum]	28.47	4e-09
c11396_g1_i1|m.8891	gi|189236477|ref|XP_974791.2| PREDICTED: protein kibra isoform X1 [Tribolium castaneum]	69.79	0
c11397_g1_i2|m.8895	gi|91077544|ref|XP_971725.1| PREDICTED: tyrosine-protein phosphatase non-receptor type 13-like isoform X1 [Tribolium castaneum]	70.63	0
c11398_g1_i1|m.8897	gi|642919310|ref|XP_008191820.1| PREDICTED: 28S ribosomal protein S10, mitochondrial [Tribolium castaneum]	65.33	5e-69
c11402_g1_i1|m.8903	gi|642931756|ref|XP_968911.2| PREDICTED: endonuclease III-like protein 1 [Tribolium castaneum]	60.64	4e-126
c11403_g1_i1|m.8904	gi|642910807|ref|XP_008193418.1| PREDICTED: AP-3 complex subunit beta-2 isoform X2 [Tribolium castaneum]	78.93	0
c11404_g1_i2|m.8909	gi|642917224|ref|XP_008191170.1| PREDICTED: ribonuclease P protein subunit p25-like protein [Tribolium castaneum]	76.34	3e-50
c11405_g1_i1|m.8910	gi|91090087|ref|XP_970401.1| PREDICTED: uncharacterized protein LOC658962 isoform X2 [Tribolium castaneum]	69.2	0
c11408_g1_i1|m.8913	gi|91092262|ref|XP_967283.1| PREDICTED: methionine aminopeptidase 1 [Tribolium castaneum]	86.74	0
c11409_g1_i1|m.8914	gi|91094501|ref|XP_971498.1| PREDICTED: translation initiation factor eIF-2B subunit alpha [Tribolium castaneum]	67.11	1e-151
c11410_g1_i1|m.8916	gi|642917334|ref|XP_008199258.1| PREDICTED: rac GTPase-activating protein 1 [Tribolium castaneum]	50.8	0
c11411_g1_i2|m.8918	gi|642930551|ref|XP_008196453.1| PREDICTED: cyclin-dependent kinase 6 isoform X2 [Tribolium castaneum]	65.55	5e-146
c11413_g1_i1|m.8920	gi|91081945|ref|XP_966990.1| PREDICTED: ATP-binding cassette sub-family F member 2 [Tribolium castaneum]	87.3	0
c11415_g2_i1|m.8921	gi|642914078|ref|XP_969963.3| PREDICTED: uncharacterized protein LOC658486 isoform X4 [Tribolium castaneum]	69.21	0
c11416_g1_i1|m.8924	gi|189239694|ref|XP_974769.2| PREDICTED: dnaJ homolog subfamily C member 1 [Tribolium castaneum]	55.02	3e-122
c11417_g1_i1|m.8925	gi|189234460|ref|XP_968338.2| PREDICTED: thioredoxin domain-containing protein [Tribolium castaneum]	62.06	3e-129
c11418_g1_i1|m.8926	gi|91080329|ref|XP_974555.1| PREDICTED: mitochondrial ornithine transporter 1 [Tribolium castaneum]	67.55	1e-150
c11419_g1_i1|m.8927	gi|283046838|ref|NP_001164362.1| pleiohomeotic [Tribolium castaneum]	85.56	0
c11420_g1_i1|m.8929	gi|189238433|ref|XP_001813225.1| PREDICTED: uncharacterized protein LOC100142040 [Tribolium castaneum]	35.23	3e-07
c11421_g1_i1|m.8931	gi|642938529|ref|XP_967703.2| PREDICTED: RUN domain-containing protein 1-like [Tribolium castaneum]	70.65	0
c11422_g1_i1|m.8932	gi|189238815|ref|XP_967266.2| PREDICTED: guanine nucleotide-binding protein G(s) subunit alpha [Tribolium castaneum]	85.56	0
c11425_g1_i1|m.8935	gi|91085557|ref|XP_966821.1| PREDICTED: peptidyl-prolyl cis-trans isomerase FKBP8 [Tribolium castaneum]	57.4	3e-138
c11426_g1_i1|m.8936	gi|91094433|ref|XP_969675.1| PREDICTED: alpha-1,6-mannosyl-glycoprotein 2-beta-N-acetylglucosaminyltransferase isoform X2 [Tribolium castaneum]	83.52	0
c11426_g1_i2|m.8937	gi|642939164|ref|XP_008200361.1| PREDICTED: alpha-1,6-mannosyl-glycoprotein 2-beta-N-acetylglucosaminyltransferase isoform X1 [Tribolium castaneum]	84.13	0
c11427_g1_i1|m.8938	gi|91086509|ref|XP_971412.1| PREDICTED: G patch domain-containing protein 11 [Tribolium castaneum]	54.97	4e-61
c11428_g1_i1|m.8939	gi|642919704|ref|XP_008192030.1| PREDICTED: serine/threonine-protein kinase SIK2 [Tribolium castaneum]	78.82	0
c11429_g1_i3|m.8942	gi|642921621|ref|XP_008192450.1| PREDICTED: nose resistant to fluoxetine protein 6 [Tribolium castaneum]	32.78	2e-76
c11431_g1_i1|m.8943	gi|642921307|ref|XP_008192811.1| PREDICTED: uncharacterized protein LOC659516 [Tribolium castaneum]	48.05	4e-111
c11434_g1_i1|m.8949	gi|91094535|ref|XP_972454.1| PREDICTED: protein crooked neck [Tribolium castaneum]	84.08	0
c11435_g1_i1|m.8950	gi|91091872|ref|XP_969240.1| PREDICTED: tubulin-specific chaperone D [Tribolium castaneum]	64.26	0
c11436_g1_i1|m.8951	gi|642929176|ref|XP_008195725.1| PREDICTED: syntaxin-16 [Tribolium castaneum]	65.92	4e-138
c11437_g1_i1|m.8952	gi|642916033|ref|XP_008190864.1| PREDICTED: lisH domain and HEAT repeat-containing protein KIAA1468 homolog [Tribolium castaneum]	54.84	0
c11440_g2_i1|m.8960	gi|642932662|ref|XP_008196937.1| PREDICTED: inactive rhomboid protein 1 [Tribolium castaneum]	76.71	0
c11441_g1_i1|m.8962	gi|642924019|ref|XP_008193971.1| PREDICTED: von Willebrand factor A domain-containing protein 9 [Tribolium castaneum]	79.76	0
c11444_g1_i2|m.8964	gi|642925661|ref|XP_008194659.1| PREDICTED: ankyrin repeat domain-containing protein 13C [Tribolium castaneum]	87.24	0
c11445_g1_i1|m.8965	gi|642931762|ref|XP_008196718.1| PREDICTED: exocyst complex component 7 [Tribolium castaneum]	75.61	0
c11446_g1_i1|m.8966	gi|642935634|ref|XP_008198091.1| PREDICTED: D-glucuronyl C5-epimerase [Tribolium castaneum]	74.61	0
c11447_g1_i1|m.8967	gi|642929251|ref|XP_008195755.1| PREDICTED: uncharacterized protein LOC100141810 isoform X2 [Tribolium castaneum]	42.77	0
c11450_g1_i1|m.8977	gi|270297206|ref|NP_001161907.1| juvenile hormone epoxide hydrolase-like protein 4 precursor [Tribolium castaneum]	57.24	0
c11451_g1_i1|m.8978	gi|642918640|ref|XP_008200423.1| PREDICTED: proton-coupled amino acid transporter 4 isoform X1 [Tribolium castaneum]	60.43	0
c11452_g1_i3|m.8980	gi|642912345|ref|XP_008199604.1| PREDICTED: RING finger protein 44 [Tribolium castaneum]	82.43	0
c11453_g1_i3|m.8983	gi|91087145|ref|XP_975296.1| PREDICTED: ATP-dependent DNA helicase 2 subunit 1 [Tribolium castaneum]	36.63	3e-87
c11454_g1_i1|m.8984	gi|91080775|ref|XP_968281.1| PREDICTED: rab GDP dissociation inhibitor alpha [Tribolium castaneum]	90.74	0
c11455_g1_i1|m.8985	gi|91082745|ref|XP_973149.1| PREDICTED: soluble NSF attachment protein [Tribolium castaneum]	86.99	0
c11456_g1_i1|m.8986	gi|189238120|ref|XP_001814158.1| PREDICTED: coiled-coil domain-containing protein 51 [Tribolium castaneum]	49.02	4e-76
c11457_g1_i1|m.8987	gi|91081719|ref|XP_971628.1| PREDICTED: leucine-zipper-like transcriptional regulator 1 [Tribolium castaneum]	75.56	0
c11458_g1_i2|m.8990	gi|642932707|ref|XP_008196953.1| PREDICTED: ubiquitin carboxyl-terminal hydrolase 45 [Tribolium castaneum]	59.63	0
c11460_g1_i2|m.8994	gi|642924902|ref|XP_008194090.1| PREDICTED: serine/threonine-protein phosphatase 2A regulatory subunit B'' subunit beta isoform X2 [Tribolium castaneum]	77.34	0
c11460_g1_i3|m.8995	gi|642924900|ref|XP_008194089.1| PREDICTED: serine/threonine-protein phosphatase 2A regulatory subunit B'' subunit beta isoform X1 [Tribolium castaneum]	76.58	0
c11461_g1_i1|m.8996	gi|642915929|ref|XP_008190815.1| PREDICTED: putative leucine-rich repeat-containing protein DDB_G0290503 [Tribolium castaneum]	29.45	7e-64
c11462_g1_i1|m.8997	gi|91091556|ref|XP_966788.1| PREDICTED: coiled-coil domain-containing protein 130 homolog [Tribolium castaneum]	68.32	2e-161
c11463_g1_i1|m.8999	gi|642921328|ref|XP_008192823.1| PREDICTED: uncharacterized protein LOC100141686 isoform X2 [Tribolium castaneum]	31.21	2e-67
c11463_g2_i1|m.9000	gi|642921326|ref|XP_008192822.1| PREDICTED: FAST kinase domain-containing protein 1 isoform X1 [Tribolium castaneum]	41.88	7e-96
c11465_g1_i1|m.9002	gi|642921874|ref|XP_008192925.1| PREDICTED: LIM domain-containing protein jub isoform X1 [Tribolium castaneum]	65.14	0
c11465_g1_i4|m.9013	gi|91081951|ref|XP_967254.1| PREDICTED: LIM domain-containing protein jub isoform X2 [Tribolium castaneum]	66.5	0
c11466_g1_i2|m.9020	gi|91091076|ref|XP_975742.1| PREDICTED: uncharacterized protein LOC655733 isoform X2 [Tribolium castaneum]	31.29	5e-12
c11466_g1_i3|m.9021	gi|91090714|ref|XP_975034.1| PREDICTED: 27 kDa hemolymph protein [Tribolium castaneum]	41.1	2e-68
c11467_g1_i1|m.9022	gi|642927336|ref|XP_974968.2| PREDICTED: protein prune homolog 2 [Tribolium castaneum]	60.88	4e-156
c11469_g1_i1|m.9024	gi|91084797|ref|XP_972841.1| PREDICTED: zinc transporter ZIP9 [Tribolium castaneum]	73.2	1e-145
c11470_g1_i1|m.9025	gi|642935189|ref|XP_008199685.1| PREDICTED: cystinosin homolog [Tribolium castaneum]	62.5	7e-174
c11471_g1_i1|m.9027	gi|91085931|ref|XP_970194.1| PREDICTED: proteasome subunit beta type-5 [Tribolium castaneum]	79.93	3e-166
c11472_g1_i1|m.9028	gi|91082695|ref|XP_971685.1| PREDICTED: protein disulfide-isomerase A3 [Tribolium castaneum]	72.71	0
c11473_g1_i2|m.9030	gi|642924266|ref|XP_008194223.1| PREDICTED: N-acetylglucosaminyl-phosphatidylinositol biosynthetic protein [Tribolium castaneum]	70.21	0
c11474_g1_i1|m.9031	gi|91078236|ref|XP_966494.1| PREDICTED: ras-related protein Rab-21 [Tribolium castaneum]	77.88	1e-116
c11475_g2_i2|m.9035	gi|642923932|ref|XP_008193933.1| PREDICTED: choline-phosphate cytidylyltransferase A-like isoform X1 [Tribolium castaneum]	74.73	0
c11476_g1_i1|m.9040	gi|642937291|ref|XP_008198773.1| PREDICTED: mannosyl-oligosaccharide alpha-1,2-mannosidase isoform A-like isoform X2 [Tribolium castaneum]	78.24	0
c11476_g1_i2|m.9041	gi|91091790|ref|XP_970226.1| PREDICTED: mannosyl-oligosaccharide alpha-1,2-mannosidase isoform A-like isoform X1 [Tribolium castaneum]	77.83	0
c11477_g1_i2|m.9042	gi|189239148|ref|XP_001807448.1| PREDICTED: protein doublesex [Tribolium castaneum]	80.69	3e-114
c11478_g1_i1|m.9044	gi|642937954|ref|XP_008199143.1| PREDICTED: isoleucine--tRNA ligase, mitochondrial [Tribolium castaneum]	54.56	0
c11479_g1_i1|m.9046	gi|282720991|ref|NP_001164246.1| epsin-like protein [Tribolium castaneum]	69.55	4e-145
c11480_g2_i1|m.9048	gi|91076018|ref|XP_971559.1| PREDICTED: uncharacterized protein LOC660215 [Tribolium castaneum]	42.2	4e-33
c11481_g1_i2|m.9050	gi|268370155|ref|NP_001161257.1| polypeptide GalNAc transferase 6-like [Tribolium castaneum]	80.07	0
c11484_g1_i1|m.9054	gi|642926901|ref|XP_008195058.1| PREDICTED: cell division control protein 45 homolog [Tribolium castaneum]	65.48	0
c11487_g1_i2|m.9059	gi|642916693|ref|XP_008192186.1| PREDICTED: membrane-bound transcription factor site-1 protease isoform X2 [Tribolium castaneum]	79.85	0
c11488_g1_i2|m.9063	gi|91086799|ref|XP_973439.1| PREDICTED: protein O-mannosyl-transferase 2 [Tribolium castaneum]	79.33	0
c11489_g1_i1|m.9064	gi|91082905|ref|XP_972330.1| PREDICTED: eukaryotic translation initiation factor 2A [Tribolium castaneum]	58.4	0
c11490_g1_i1|m.9065	gi|91083973|ref|XP_975149.1| PREDICTED: splicing factor 45 [Tribolium castaneum]	70.66	0
c11491_g1_i1|m.9067	gi|642911049|ref|XP_008200618.1| PREDICTED: UMP-CMP kinase [Tribolium castaneum]	66.18	7e-100
c11492_g1_i1|m.9068	gi|642916586|ref|XP_008191799.1| PREDICTED: uncharacterized protein LOC103312586 isoform X1 [Tribolium castaneum]	29.37	4e-49
c11493_g1_i1|m.9069	gi|642932882|ref|XP_974109.2| PREDICTED: 28S ribosomal protein S7, mitochondrial, partial [Tribolium castaneum]	65.52	2e-107
c11494_g1_i1|m.9070	gi|642939951|ref|XP_008200635.1| PREDICTED: aquaporin AQPAe.a-like isoform X2 [Tribolium castaneum]	45.34	3e-73
c11496_g1_i1|m.9072	gi|642929527|ref|XP_975104.2| PREDICTED: uncharacterized protein LOC663986 [Tribolium castaneum]	39.1	3e-119
c11497_g1_i2|m.9074	gi|642915226|ref|XP_971326.2| PREDICTED: TGF-beta receptor type-1 isoform X3 [Tribolium castaneum]	80.91	0
c11497_g1_i3|m.9075	gi|642915222|ref|XP_008190529.1| PREDICTED: TGF-beta receptor type-1 isoform X1 [Tribolium castaneum]	74.86	0
c11499_g1_i2|m.9080	gi|642936203|ref|XP_008198345.1| PREDICTED: superoxide dismutase-like protein isoform X1 [Tribolium castaneum]	54.55	2e-51
c115_g1_i1|m.39	gi|91092902|ref|XP_971056.1| PREDICTED: N-acetyltransferase 9-like protein [Tribolium castaneum]	62.89	9e-87
c11500_g1_i1|m.9081	gi|642927012|ref|XP_008195103.1| PREDICTED: RNA polymerase II-associated protein 3 [Tribolium castaneum]	43.27	3e-115
c11502_g1_i1|m.9083	gi|189237952|ref|XP_001813626.1| PREDICTED: methyltransferase-like protein 13 [Tribolium castaneum]	58.26	0
c11505_g2_i1|m.9088	gi|642914685|ref|XP_008190314.1| PREDICTED: LOW QUALITY PROTEIN: proto-oncogene tyrosine-protein kinase ROS [Tribolium castaneum]	55.54	0
c11506_g1_i1|m.9092	gi|642928115|ref|XP_008200163.1| PREDICTED: protein anoxia up-regulated isoform X1 [Tribolium castaneum]	53.2	7e-155
c11506_g1_i3|m.9094	gi|642928123|ref|XP_008200167.1| PREDICTED: trichohyalin isoform X5 [Tribolium castaneum]	60.17	9e-90
c11508_g1_i3|m.9100	gi|642931230|ref|XP_971294.2| PREDICTED: thymidine kinase 2, mitochondrial-like [Tribolium castaneum]	65.57	3e-98
c11508_g2_i1|m.9098	gi|91088147|ref|XP_971356.1| PREDICTED: platelet-activating factor acetylhydrolase [Tribolium castaneum]	52.48	4e-144
c11509_g1_i1|m.9101	gi|237820627|ref|NP_001153781.1| saccharopine dehydrogenase-like [Tribolium castaneum]	53.08	1e-163
c11510_g1_i1|m.9102	gi|91086451|ref|XP_969201.1| PREDICTED: methionine--tRNA ligase, cytoplasmic [Tribolium castaneum]	58.16	0
c11511_g1_i1|m.9103	gi|189238819|ref|XP_967914.2| PREDICTED: N6-adenosine-methyltransferase 70 kDa subunit [Tribolium castaneum]	76.88	0
c11511_g1_i1|m.9104	gi|91085889|ref|XP_967833.1| PREDICTED: UPF0183 protein CG7083 isoform X1 [Tribolium castaneum]	77.56	0
c11513_g1_i3|m.9109	gi|91094281|ref|XP_970827.1| PREDICTED: protein MEMO1 [Tribolium castaneum]	88.14	0
c11514_g1_i1|m.9111	gi|642917723|ref|XP_008191346.1| PREDICTED: peptidyl-prolyl cis-trans isomerase NIMA-interacting 1 [Tribolium castaneum]	87.26	1e-101
c11516_g1_i1|m.9114	gi|91094797|ref|XP_966355.1| PREDICTED: elongation factor 1-alpha [Tribolium castaneum]	94.24	0
c11517_g1_i1|m.9116	gi|642916067|ref|XP_970503.2| PREDICTED: major facilitator superfamily domain-containing protein 6 [Tribolium castaneum]	51.2	0
c11519_g1_i1|m.9118	gi|642932902|ref|XP_008197179.1| PREDICTED: carboxypeptidase M isoform X2 [Tribolium castaneum]	80.23	0
c11520_g1_i3|m.9122	gi|642933328|ref|XP_969796.2| PREDICTED: glucose-induced degradation protein 4 homolog [Tribolium castaneum]	94.09	1e-144
c11521_g1_i1|m.9123	gi|91081833|ref|XP_974716.1| PREDICTED: replication factor C subunit 4 [Tribolium castaneum]	69.14	0
c11523_g1_i3|m.9127	gi|642930808|ref|XP_008196098.1| PREDICTED: TAR DNA-binding protein 43-like isoform X2 [Tribolium castaneum]	87.95	0
c11523_g1_i4|m.9128	gi|91087839|ref|XP_967837.1| PREDICTED: TAR DNA-binding protein 43-like isoform X1 [Tribolium castaneum]	84.22	0
c11524_g1_i1|m.9130	gi|91085965|ref|XP_971530.1| PREDICTED: protein ERGIC-53 [Tribolium castaneum]	69.75	0
c11525_g1_i1|m.9131	gi|642912538|ref|XP_008200905.1| PREDICTED: uncharacterized protein LOC103315037 [Tribolium castaneum]	47.06	4e-50
c11526_g1_i1|m.9132	gi|642917872|ref|XP_969181.2| PREDICTED: SET and MYND domain-containing protein 4-like [Tribolium castaneum]	41.61	1e-128
c11527_g1_i2|m.9134	gi|642913250|ref|XP_008201456.1| PREDICTED: probable dolichyl pyrophosphate Glc1Man9GlcNAc2 alpha-1,3-glucosyltransferase [Tribolium castaneum]	65.68	0
c11528_g1_i1|m.9135	gi|642914785|ref|XP_008190351.1| PREDICTED: LIM domain-binding protein 2 isoform X6 [Tribolium castaneum]	91.84	0
c11529_g1_i1|m.9137	gi|642932082|ref|XP_008196850.1| PREDICTED: zinc finger with UFM1-specific peptidase domain protein-like isoform X2 [Tribolium castaneum]	76.18	0
c11530_g1_i1|m.9140	gi|642930199|ref|XP_969558.2| PREDICTED: uncharacterized protein LOC658052 [Tribolium castaneum]	43.99	2e-78
c11532_g1_i1|m.9146	gi|642913622|ref|XP_008201092.1| PREDICTED: moesin/ezrin/radixin homolog 1 isoform X3 [Tribolium castaneum]	89.79	0
c11532_g1_i2|m.9147	gi|642913620|ref|XP_008201091.1| PREDICTED: moesin/ezrin/radixin homolog 1 isoform X2 [Tribolium castaneum]	90	0
c11533_g1_i1|m.9148	gi|91076704|ref|XP_972106.1| PREDICTED: UDP-galactose translocator [Tribolium castaneum]	73.15	2e-163
c11534_g1_i1|m.9149	gi|642910800|ref|XP_008193416.1| PREDICTED: ferrochelatase, mitochondrial [Tribolium castaneum]	70.17	0
c11535_g1_i1|m.9150	gi|642911114|ref|XP_008200584.1| PREDICTED: tyrosine-protein phosphatase 99A [Tribolium castaneum]	73.21	0
c11536_g1_i1|m.9153	gi|91092856|ref|XP_969290.1| PREDICTED: protein furry [Tribolium castaneum]	70.87	0
c11537_g1_i2|m.9157	gi|189241724|ref|XP_001809620.1| PREDICTED: cytochrome P450 6k1-like [Tribolium castaneum]	38.66	8e-135
c11538_g1_i2|m.9159	gi|642912622|ref|XP_008200937.1| PREDICTED: glutathione S-transferase 1-like [Tribolium castaneum]	43.78	3e-61
c11539_g1_i1|m.9160	gi|91079774|ref|XP_967412.1| PREDICTED: glutathione S-transferase omega-1 [Tribolium castaneum]	61.98	3e-110
c11542_g1_i1|m.9164	gi|642929895|ref|XP_008196017.1| PREDICTED: nucleolar protein 9 [Tribolium castaneum]	54.59	0
c11543_g1_i1|m.9166	gi|189239941|ref|XP_001812325.1| PREDICTED: copper transporter 5.1 [Tribolium castaneum]	42.16	1e-52
c11543_g1_i2|m.9167	gi|642929695|ref|XP_008195939.1| PREDICTED: delta-aminolevulinic acid dehydratase [Tribolium castaneum]	71.08	8e-171
c11545_g1_i2|m.9171	gi|91086165|ref|XP_970259.1| PREDICTED: ATP-dependent zinc metalloprotease YME1 homolog [Tribolium castaneum]	76.01	0
c11546_g1_i1|m.9172	gi|642923957|ref|XP_008193940.1| PREDICTED: uncharacterized protein LOC659389 [Tribolium castaneum]	37.86	1e-47
c11548_g1_i1|m.9175	gi|91087085|ref|XP_974959.1| PREDICTED: phytepsin [Tribolium castaneum]	50.43	1e-119
c11551_g1_i1|m.9180	gi|642936127|ref|XP_974888.3| PREDICTED: E3 ubiquitin-protein ligase MARCH5 [Tribolium castaneum]	68.62	2e-156
c11552_g1_i1|m.9184	gi|91089687|ref|XP_974686.1| PREDICTED: facilitated trehalose transporter Tret1 [Tribolium castaneum]	44.42	4e-128
c11553_g1_i1|m.9185	gi|189237885|ref|XP_975345.2| PREDICTED: conserved oligomeric Golgi complex subunit 4 [Tribolium castaneum]	69.19	0
c11555_g1_i1|m.9188	gi|642933041|ref|XP_008197240.1| PREDICTED: neo-calmodulin-like isoform X2 [Tribolium castaneum]	96.67	1e-101
c11557_g1_i1|m.9192	gi|642914217|ref|XP_008201594.1| PREDICTED: abl interactor 2-like [Tribolium castaneum]	80.08	0
c11562_g1_i1|m.9202	gi|91076870|ref|XP_974984.1| PREDICTED: regulator of nonsense transcripts 3A [Tribolium castaneum]	49.11	2e-92
c11563_g1_i2|m.9204	gi|189242404|ref|XP_968940.2| PREDICTED: palmitoyltransferase ZDHHC5 isoform X2 [Tribolium castaneum]	87.32	0
c11564_g1_i1|m.9205	gi|91082885|ref|XP_971739.1| PREDICTED: leucine-rich repeat extensin-like protein 3 [Tribolium castaneum]	48.36	2e-142
c11565_g1_i2|m.9207	gi|642917599|ref|XP_008191274.1| PREDICTED: biogenesis of lysosome-related organelles complex 1 subunit 4 isoform X1 [Tribolium castaneum]	42.07	6e-29
c11566_g3_i2|m.9212	gi|642920080|ref|XP_001816051.2| PREDICTED: uncharacterized protein LOC100142030 [Tribolium castaneum]	60.29	0
c11567_g1_i1|m.9213	gi|642917191|ref|XP_975978.2| PREDICTED: active regulator of SIRT1-like [Tribolium castaneum]	42.11	1e-20
c11568_g1_i1|m.9214	gi|91086195|ref|XP_971475.1| PREDICTED: protein transport protein Sec23A isoform X2 [Tribolium castaneum]	90.87	0
c11569_g1_i1|m.9215	gi|91080077|ref|XP_967815.1| PREDICTED: gamma-soluble NSF attachment protein [Tribolium castaneum]	75.07	0
c11571_g1_i1|m.9217	gi|642936814|ref|XP_008199627.1| PREDICTED: carotenoid isomerooxygenase [Tribolium castaneum]	51.34	0
c11573_g2_i1|m.9219	gi|642911480|ref|XP_008199442.1| PREDICTED: retinol dehydrogenase 13-like [Tribolium castaneum]	63.99	8e-134
c11574_g1_i1|m.9220	gi|91085155|ref|XP_970322.1| PREDICTED: NADPH:adrenodoxin oxidoreductase, mitochondrial [Tribolium castaneum]	50.55	6e-167
c11575_g1_i1|m.9222	gi|642914979|ref|XP_008190468.1| PREDICTED: regulator of nonsense transcripts 1 homolog [Tribolium castaneum]	92.66	0
c11576_g1_i3|m.9225	gi|642933484|ref|XP_973892.2| PREDICTED: soluble calcium-activated nucleotidase 1 [Tribolium castaneum]	70.08	0
c11577_g1_i1|m.9226	gi|642931768|ref|XP_008196720.1| PREDICTED: cytohesin-1 isoform X3 [Tribolium castaneum]	88.57	0
c11577_g1_i2|m.9228	gi|642931770|ref|XP_008196721.1| PREDICTED: cytohesin-1 isoform X4 [Tribolium castaneum]	92.25	0
c11578_g1_i4|m.9233	gi|642929081|ref|XP_008195683.1| PREDICTED: venom metalloproteinase 3 isoform X3 [Tribolium castaneum]	68.65	0
c11579_g1_i1|m.9234	gi|91089933|ref|XP_967141.1| PREDICTED: uncharacterized protein LOC661824 [Tribolium castaneum]	34.7	3e-50
c11581_g1_i1|m.9235	gi|91079995|ref|XP_970906.1| PREDICTED: FK506-binding protein 2 isoform X2 [Tribolium castaneum]	76.26	9e-111
c11582_g1_i1|m.9238	gi|642922975|ref|XP_008200476.1| PREDICTED: growth hormone-regulated TBC protein 1 [Tribolium castaneum]	65.33	7e-162
c11583_g1_i2|m.9240	gi|642936307|ref|XP_008198389.1| PREDICTED: protein FAM107B isoform X2 [Tribolium castaneum]	59.36	2e-62
c11584_g1_i2|m.9244	gi|642922052|ref|XP_008193000.1| PREDICTED: uncharacterized protein LOC662639 [Tribolium castaneum]	65.07	0
c11586_g1_i1|m.9258	gi|642935068|ref|XP_008197870.1| PREDICTED: phosphatidylinositol 4,5-bisphosphate 3-kinase catalytic subunit delta isoform [Tribolium castaneum]	63.52	0
c11587_g2_i1|m.9259	gi|91092776|ref|XP_973805.1| PREDICTED: uncharacterized protein C4orf29 isoform X2 [Tribolium castaneum]	57.53	0
c11588_g1_i1|m.9261	gi|642920454|ref|XP_008192357.1| PREDICTED: protein croquemort isoform X2 [Tribolium castaneum]	42.71	2e-140
c11589_g1_i1|m.9262	gi|642931905|ref|XP_008196776.1| PREDICTED: melanoma-associated antigen D2-like [Tribolium castaneum]	45.6	8e-59
c11591_g1_i2|m.9265	gi|282721016|ref|NP_001164208.1| supernumerary limbs [Tribolium castaneum]	87.4	0
c11592_g1_i1|m.9266	gi|91093575|ref|XP_968639.1| PREDICTED: AP-1 complex subunit mu-1 [Tribolium castaneum]	97.63	0
c11593_g1_i2|m.9269	gi|642920687|ref|XP_968441.2| PREDICTED: DNA-binding protein D-ETS-4 isoform X1 [Tribolium castaneum]	59.04	0
c11594_g1_i1|m.9271	gi|642916875|ref|XP_969942.2| PREDICTED: guanosine-3',5'-bis(diphosphate) 3'-pyrophosphohydrolase MESH1 [Tribolium castaneum]	70.59	1e-86
c11595_g1_i1|m.9272	gi|91088615|ref|XP_974002.1| PREDICTED: sepiapterin reductase [Tribolium castaneum]	48.67	4e-84
c11597_g2_i1|m.9274	gi|642914660|ref|XP_974035.2| PREDICTED: transmembrane protein 230 [Tribolium castaneum]	49.14	2e-34
c11598_g1_i1|m.9276	gi|91078582|ref|XP_971900.1| PREDICTED: FK506-binding protein 5 isoform X2 [Tribolium castaneum]	42.45	2e-56
c11599_g1_i2|m.9280	gi|91088313|ref|XP_966779.1| PREDICTED: 6-phosphofructokinase isoform X1 [Tribolium castaneum]	83.01	0
c11600_g1_i1|m.9284	gi|642912175|ref|XP_008200838.1| PREDICTED: heterogeneous nuclear ribonucleoprotein A1, A2/B1 homolog isoform X2 [Tribolium castaneum]	71.04	4e-133
c11601_g1_i1|m.9286	gi|642927308|ref|XP_008195215.1| PREDICTED: peroxisomal multifunctional enzyme type 2 isoform X2 [Tribolium castaneum]	64.8	5e-52
c11601_g1_i2|m.9287	gi|91085817|ref|XP_974784.1| PREDICTED: peroxisomal multifunctional enzyme type 2 isoform X1 [Tribolium castaneum]	66.25	0
c11605_g1_i4|m.9296	gi|642931493|ref|XP_008196608.1| PREDICTED: nitrogen permease regulator 2-like protein [Tribolium castaneum]	74.34	2e-149
c11605_g1_i4|m.9297	gi|642931189|ref|XP_008196475.1| PREDICTED: glutathione S-transferase theta-1 [Tribolium castaneum]	56.76	4e-91
c11606_g1_i4|m.9301	gi|91090270|ref|XP_970541.1| PREDICTED: uncharacterized protein LOC659116 [Tribolium castaneum]	32.24	7e-69
c11607_g1_i1|m.9302	gi|91083675|ref|XP_968367.1| PREDICTED: serine/threonine-protein kinase PINK1, mitochondrial [Tribolium castaneum]	61.21	0
c11608_g1_i1|m.9303	gi|91077170|ref|XP_972058.1| PREDICTED: protein AAR2 homolog [Tribolium castaneum]	51.08	1e-137
c11609_g1_i1|m.9304	gi|642936386|ref|XP_971934.2| PREDICTED: probable cytosolic iron-sulfur protein assembly protein Ciao1 isoform X1 [Tribolium castaneum]	70.03	4e-174
c11609_g2_i1|m.9306	gi|642936388|ref|XP_971879.2| PREDICTED: putative GTP cyclohydrolase 1 type 2 NIF3L1 isoform X2 [Tribolium castaneum]	55.92	2e-114
c11610_g1_i1|m.9307	gi|91078042|ref|XP_966587.1| PREDICTED: lipid storage droplets surface-binding protein 1-like isoform X1 [Tribolium castaneum]	51.55	3e-119
c11611_g2_i1|m.9310	gi|642933341|ref|XP_008197374.1| PREDICTED: probable serine hydrolase [Tribolium castaneum]	57.77	2e-127
c11612_g1_i1|m.9311	gi|91087767|ref|XP_975031.1| PREDICTED: vacuolar protein sorting-associated protein 28 homolog [Tribolium castaneum]	87.79	6e-140
c11613_g1_i2|m.9313	gi|642934335|ref|XP_969733.2| PREDICTED: tripartite motif-containing protein 2 isoform X5 [Tribolium castaneum]	77.6	0
c11615_g1_i2|m.9316	gi|642917587|ref|XP_008191269.1| PREDICTED: zinc finger matrin-type protein 5 [Tribolium castaneum]	61.08	4e-65
c11616_g1_i1|m.9317	gi|642915323|ref|XP_008190571.1| PREDICTED: valine--tRNA ligase [Tribolium castaneum]	58.57	0
c11617_g1_i1|m.9319	gi|642917699|ref|XP_008191335.1| PREDICTED: mitogen-activated protein kinase kinase kinase kinase 5 isoform X5 [Tribolium castaneum]	86.54	0
c11617_g1_i2|m.9320	gi|642917703|ref|XP_008191337.1| PREDICTED: mitogen-activated protein kinase kinase kinase kinase 5 isoform X7 [Tribolium castaneum]	85.14	0
c11617_g1_i4|m.9322	gi|642917693|ref|XP_008191332.1| PREDICTED: mitogen-activated protein kinase kinase kinase kinase 5 isoform X2 [Tribolium castaneum]	85.04	0
c11618_g1_i1|m.9323	gi|642915518|ref|XP_968660.2| PREDICTED: syntaxin-8 [Tribolium castaneum]	54.39	1e-84
c11619_g1_i1|m.9324	gi|91084077|ref|XP_968062.1| PREDICTED: protein odr-4 homolog [Tribolium castaneum]	48.65	2e-142
c11619_g1_i1|m.9325	gi|642917480|ref|XP_008191219.1| PREDICTED: probable RNA-binding protein 18 [Tribolium castaneum]	65.41	1e-83
c11620_g1_i2|m.9327	gi|642933354|ref|XP_008197380.1| PREDICTED: uncharacterized protein LOC100142446 [Tribolium castaneum]	43.62	1e-69
c11621_g1_i1|m.9329	gi|642937910|ref|XP_008200354.1| PREDICTED: zinc finger RNA-binding protein [Tribolium castaneum]	77.47	0
c11622_g1_i1|m.9339	gi|91092586|ref|XP_969940.1| PREDICTED: protein unzipped [Tribolium castaneum]	49.1	6e-119
c11623_g1_i1|m.9340	gi|91076374|ref|XP_967954.1| PREDICTED: DNA ligase 3 [Tribolium castaneum]	61.63	0
c11624_g1_i1|m.9341	gi|642925622|ref|XP_008194644.1| PREDICTED: polypeptide N-acetylgalactosaminyltransferase 1 [Tribolium castaneum]	72.63	0
c11625_g1_i1|m.9342	gi|91093789|ref|XP_967550.1| PREDICTED: protein SON [Tribolium castaneum]	55.23	0
c11627_g1_i1|m.9348	gi|91078482|ref|XP_975769.1| PREDICTED: cytochrome b-c1 complex subunit 2, mitochondrial [Tribolium castaneum]	53.12	5e-163
c11628_g1_i1|m.9350	gi|642921256|ref|XP_008192787.1| PREDICTED: FK506-binding protein 59 [Tribolium castaneum]	68.82	0
c11629_g1_i1|m.9352	gi|642924017|ref|XP_008193970.1| PREDICTED: dnaJ homolog subfamily C member 2 [Tribolium castaneum]	68.67	0
c11630_g1_i1|m.9353	gi|91093953|ref|XP_966436.1| PREDICTED: uncharacterized protein LOC655909 isoform X2 [Tribolium castaneum]	53.43	2e-85
c11631_g1_i1|m.9354	gi|91092830|ref|XP_968086.1| PREDICTED: prefoldin subunit 6 [Tribolium castaneum]	56.88	3e-39
c11632_g1_i1|m.9355	gi|91080711|ref|XP_975322.1| PREDICTED: syntaxin-5 [Tribolium castaneum]	76.06	0
c11633_g1_i1|m.9356	gi|642912580|ref|XP_008200918.1| PREDICTED: programmed cell death protein 4 isoform X1 [Tribolium castaneum]	70.8	0
c11634_g1_i1|m.9357	gi|91088249|ref|XP_966392.1| PREDICTED: myosin-IA [Tribolium castaneum]	73.96	0
c11635_g1_i1|m.9359	gi|91091360|ref|XP_972551.1| PREDICTED: 26S protease regulatory subunit 8 [Tribolium castaneum]	98.28	0
c11636_g1_i1|m.9360	gi|91079020|ref|XP_974879.1| PREDICTED: staphylococcal nuclease domain-containing protein 1 [Tribolium castaneum]	73.03	0
c11638_g1_i1|m.9365	gi|91081371|ref|XP_971796.1| PREDICTED: coiled-coil domain-containing protein 94 [Tribolium castaneum]	70.59	1e-117
c11639_g1_i1|m.9366	gi|91091464|ref|XP_973095.1| PREDICTED: threonine aspartase 1 [Tribolium castaneum]	64.91	8e-163
c11640_g1_i1|m.9368	gi|642921713|ref|XP_008194794.1| PREDICTED: transcription factor Sp4-like, partial [Tribolium castaneum]	76.07	5e-138
c11641_g1_i1|m.9369	gi|642919603|ref|XP_008191935.1| PREDICTED: arginine--tRNA ligase, cytoplasmic isoform X2 [Tribolium castaneum]	73.19	0
c11642_g1_i1|m.9372	gi|642910465|ref|XP_008200225.1| PREDICTED: uncharacterized protein LOC103314871 [Tribolium castaneum]	26.5	1e-38
c11644_g1_i1|m.9377	gi|642938128|ref|XP_008199776.1| PREDICTED: inositol monophosphatase 1 isoform X2 [Tribolium castaneum]	62.77	5e-135
c11645_g1_i1|m.9378	gi|91089353|ref|XP_972936.1| PREDICTED: coiled-coil domain-containing protein 137 [Tribolium castaneum]	46.32	2e-29
c11646_g1_i1|m.9379	gi|642938810|ref|XP_008199929.1| PREDICTED: Z9 acyl-CoA desaturase B isoform X1 [Tribolium castaneum]	73.3	0
c11647_g1_i3|m.9384	gi|642937834|ref|XP_008200320.1| PREDICTED: AN1-type zinc finger protein 6 [Tribolium castaneum]	68.82	4e-76
c11651_g1_i1|m.9392	gi|642938721|ref|XP_008200657.1| PREDICTED: nose resistant to fluoxetine protein 6-like [Tribolium castaneum]	34.04	4e-100
c11653_g1_i2|m.9394	gi|91081119|ref|XP_975527.1| PREDICTED: lipoyl synthase, mitochondrial [Tribolium castaneum]	72.43	0
c11655_g1_i1|m.9399	gi|642920586|ref|XP_008192475.1| PREDICTED: voltage-dependent calcium channel subunit alpha-2/delta-3-like [Tribolium castaneum]	42.67	0
c11657_g1_i1|m.9403	gi|189233577|ref|XP_968497.2| PREDICTED: protein capicua homolog isoform X1 [Tribolium castaneum]	60.54	0
c11658_g1_i1|m.9404	gi|642912158|ref|XP_008200830.1| PREDICTED: tRNA pseudouridine synthase A, mitochondrial [Tribolium castaneum]	60	1e-165
c11659_g1_i2|m.9406	gi|91083325|ref|XP_974870.1| PREDICTED: E3 ubiquitin-protein ligase MIB1 [Tribolium castaneum]	90.74	0
c11660_g1_i1|m.9407	gi|91085437|ref|XP_968834.1| PREDICTED: protein zyg-11 homolog [Tribolium castaneum]	63.55	0
c11661_g1_i1|m.9409	gi|91088817|ref|XP_969793.1| PREDICTED: adenylosuccinate lyase [Tribolium castaneum]	76.22	0
c11665_g1_i2|m.9414	gi|91079360|ref|XP_970234.1| PREDICTED: armadillo repeat-containing protein 8 [Tribolium castaneum]	71.41	0
c11666_g1_i1|m.9416	gi|91093150|ref|XP_970085.1| PREDICTED: ribosomal protein S6 kinase alpha-5 isoform X1 [Tribolium castaneum]	73.25	0
c11667_g1_i1|m.9417	gi|642928090|ref|XP_008200152.1| PREDICTED: ATP-dependent RNA helicase DDX24 [Tribolium castaneum]	57.27	0
c11670_g1_i1|m.9429	gi|642930318|ref|XP_972929.2| PREDICTED: WD repeat-containing protein 20 [Tribolium castaneum]	86.39	0
c11671_g1_i2|m.9432	gi|642917038|ref|XP_008191092.1| PREDICTED: protein FAM206A [Tribolium castaneum]	49.68	1e-48
c11672_g2_i1|m.9435	gi|642937760|ref|XP_008198934.1| PREDICTED: mortality factor 4-like protein 1 [Tribolium castaneum]	76.78	0
c11673_g1_i1|m.9436	gi|642916796|ref|XP_008199507.1| PREDICTED: fibrillin-2 [Tribolium castaneum]	43.83	4e-144
c11674_g1_i1|m.9437	gi|91080645|ref|XP_974525.1| PREDICTED: KIF1-binding protein homolog [Tribolium castaneum]	60.57	0
c11675_g1_i1|m.9438	gi|642939867|ref|XP_969882.2| PREDICTED: alpha-aminoadipic semialdehyde dehydrogenase [Tribolium castaneum]	82.13	0
c11676_g1_i1|m.9441	gi|642937115|ref|XP_008198698.1| PREDICTED: uncharacterized protein LOC103314418 [Tribolium castaneum]	58.33	0
c11677_g1_i1|m.9442	gi|91094199|ref|XP_971496.1| PREDICTED: probable DNA-directed RNA polymerase III subunit RPC6 [Tribolium castaneum]	72.66	3e-155
c11677_g1_i1|m.9443	gi|642927963|ref|XP_008195464.1| PREDICTED: uncharacterized protein LOC103313591 [Tribolium castaneum]	30.77	5e-13
c11678_g1_i1|m.9444	gi|642917126|ref|XP_008191126.1| PREDICTED: uncharacterized protein LOC659233 [Tribolium castaneum]	46.53	6e-133
c11679_g1_i1|m.9445	gi|189238203|ref|XP_001809288.1| PREDICTED: TAF6-like RNA polymerase II p300/CBP-associated factor-associated factor 65 kDa subunit 6L [Tribolium castaneum]	44.25	4e-124
c11680_g1_i1|m.9446	gi|642940167|ref|XP_008194639.1| PREDICTED: leucine-rich repeat-containing protein 15-like [Tribolium castaneum]	34.44	7e-56
c11681_g1_i1|m.9447	gi|189237947|ref|XP_001811565.1| PREDICTED: probable serine/threonine-protein kinase ifkC [Tribolium castaneum]	55.94	0
c11683_g1_i1|m.9450	gi|642918098|ref|XP_968562.2| PREDICTED: leucine-rich repeat-containing protein 57 [Tribolium castaneum]	50.16	1e-99
c11684_g1_i4|m.9455	gi|642921701|ref|XP_008194730.1| PREDICTED: 1-acyl-sn-glycerol-3-phosphate acyltransferase delta [Tribolium castaneum]	70.13	0
c11686_g2_i1|m.9458	gi|642939200|ref|XP_008200378.1| PREDICTED: plasminogen activator inhibitor 1 RNA-binding protein-like, partial [Tribolium castaneum]	58.7	9e-83
c11687_g1_i1|m.9462	gi|91094127|ref|XP_968492.1| PREDICTED: probable aminopeptidase NPEPL1 [Tribolium castaneum]	75.1	0
c11689_g1_i2|m.9469	gi|642931992|ref|XP_008196811.1| PREDICTED: uncharacterized protein LOC663257 [Tribolium castaneum]	53.07	1e-73
c11690_g1_i1|m.9470	gi|642918336|ref|XP_008196857.1| PREDICTED: serine/threonine-protein kinase tricorner [Tribolium castaneum]	92.94	0
c11690_g1_i2|m.9472	gi|91079913|ref|XP_966985.1| PREDICTED: transcription initiation factor TFIID subunit 11 [Tribolium castaneum]	64.32	4e-74
c11690_g2_i1|m.9473	gi|642918338|ref|XP_008196865.1| PREDICTED: sushi, nidogen and EGF-like domain-containing protein 1 [Tribolium castaneum]	63.03	8e-52
c11691_g1_i1|m.9474	gi|91091970|ref|XP_968583.1| PREDICTED: synaptotagmin-11 [Tribolium castaneum]	85.49	0
c11692_g1_i1|m.9475	gi|642926973|ref|XP_008195085.1| PREDICTED: rho guanine nucleotide exchange factor 18 isoform X2 [Tribolium castaneum]	72.66	0
c11693_g1_i1|m.9477	gi|642935482|ref|XP_966866.3| PREDICTED: facilitated trehalose transporter Tret1-like isoform X1 [Tribolium castaneum]	46.27	4e-154
c11694_g1_i2|m.9479	gi|91085733|ref|XP_973505.1| PREDICTED: tRNA (cytosine(34)-C(5))-methyltransferase [Tribolium castaneum]	66.38	0
c11695_g1_i1|m.9480	gi|642914633|ref|XP_973587.2| PREDICTED: uncharacterized protein LOC662396 [Tribolium castaneum]	39.32	4e-103
c11696_g1_i1|m.9481	gi|642915083|ref|XP_008190404.1| PREDICTED: aquaporin AQPAn.G [Tribolium castaneum]	61.99	3e-113
c11697_g1_i3|m.9484	gi|642911006|ref|XP_008193505.1| PREDICTED: uncharacterized protein LOC662256 isoform X2 [Tribolium castaneum]	72.97	0
c11699_g1_i1|m.9486	gi|642929789|ref|XP_008195977.1| PREDICTED: oxysterol-binding protein-related protein 9 isoform X1 [Tribolium castaneum]	69.46	0
c11701_g1_i2|m.9490	gi|642935032|ref|XP_008199913.1| PREDICTED: protein Skeletor, isoforms B/C isoform X2 [Tribolium castaneum]	80.51	0
c11702_g1_i1|m.9491	gi|91081785|ref|XP_973657.1| PREDICTED: putative E3 ubiquitin-protein ligase UBR7 [Tribolium castaneum]	63.94	2e-91
c11704_g1_i1|m.9495	gi|91088439|ref|XP_968151.1| PREDICTED: uncharacterized protein LOC656533 [Tribolium castaneum]	61.17	5e-91
c11705_g1_i2|m.9497	gi|91085405|ref|XP_967263.1| PREDICTED: serine/arginine-rich splicing factor 1A [Tribolium castaneum]	92.13	2e-112
c11707_g1_i1|m.9499	gi|91095041|ref|XP_971778.1| PREDICTED: cysteine-rich with EGF-like domain protein 2 [Tribolium castaneum]	61.64	1e-169
c11708_g1_i1|m.9500	gi|91093927|ref|XP_976373.1| PREDICTED: uncharacterized protein LOC661127 [Tribolium castaneum]	50.34	1e-41
c11712_g1_i2|m.9505	gi|642936375|ref|XP_971546.2| PREDICTED: WW domain-binding protein 4 isoform X2 [Tribolium castaneum]	52.74	5e-98
c11713_g1_i1|m.9506	gi|642926094|ref|XP_008194781.1| PREDICTED: uncharacterized protein LOC103313400 [Tribolium castaneum]	25.65	2e-17
c11714_g1_i1|m.9507	gi|642911771|ref|XP_008200734.1| PREDICTED: transketolase-like protein 2 isoform X2 [Tribolium castaneum]	78.4	0
c11714_g1_i2|m.9508	gi|642911769|ref|XP_967219.2| PREDICTED: transketolase-like protein 2 isoform X1 [Tribolium castaneum]	79.17	0
c11717_g1_i1|m.9510	gi|91086141|ref|XP_969127.1| PREDICTED: protein SEC13 homolog [Tribolium castaneum]	77.45	0
c11718_g1_i2|m.9512	gi|91080099|ref|XP_966636.1| PREDICTED: tumor protein p53-inducible nuclear protein 2 [Tribolium castaneum]	42.71	8e-55
c11720_g1_i2|m.9514	gi|642937326|ref|XP_008198789.1| PREDICTED: splicing factor 1 [Tribolium castaneum]	74.76	0
c11722_g1_i1|m.9519	gi|642924296|ref|XP_008194236.1| PREDICTED: protein brambleberry-like isoform X2 [Tribolium castaneum]	52.86	0
c11723_g1_i1|m.9520	gi|642934500|ref|XP_008197691.1| PREDICTED: hairy/enhancer-of-split related with YRPW motif-like protein [Tribolium castaneum]	56.19	3e-146
c11724_g1_i1|m.9521	gi|642912912|ref|XP_008201304.1| PREDICTED: NADH-cytochrome b5 reductase 2 isoform X3 [Tribolium castaneum]	77.07	0
c11724_g1_i2|m.9522	gi|91076702|ref|XP_972057.1| PREDICTED: NADH-cytochrome b5 reductase 2 isoform X2 [Tribolium castaneum]	77.92	0
c11725_g1_i1|m.9523	gi|91093052|ref|XP_967459.1| PREDICTED: T-complex protein 1 subunit eta [Tribolium castaneum]	88.52	0
c11726_g1_i1|m.9524	gi|91093144|ref|XP_969873.1| PREDICTED: uncharacterized protein LOC658386 [Tribolium castaneum]	68.7	3e-114
c11730_g1_i1|m.9528	gi|91092480|ref|XP_967611.1| PREDICTED: probable dynactin subunit 2 [Tribolium castaneum]	67.99	8e-149
c11731_g1_i1|m.9529	gi|91086365|ref|XP_974582.1| PREDICTED: peroxisomal membrane protein 11B [Tribolium castaneum]	56.47	4e-97
c11732_g1_i1|m.9530	gi|189234456|ref|XP_968035.2| PREDICTED: phosphatidylinositol 3-kinase catalytic subunit type 3 [Tribolium castaneum]	76.96	0
c11736_g1_i1|m.9537	gi|642936953|ref|XP_008198627.1| PREDICTED: UPF0668 protein C10orf76 homolog [Tribolium castaneum]	68.02	0
c11737_g1_i1|m.9538	gi|91091628|ref|XP_970031.1| PREDICTED: dihydroorotate dehydrogenase (quinone), mitochondrial [Tribolium castaneum]	63.94	0
c11738_g1_i3|m.9543	gi|91079594|ref|XP_967887.1| PREDICTED: probable E3 ubiquitin-protein ligase RNF144A isoform X1 [Tribolium castaneum]	74.61	0
c11739_g1_i1|m.9545	gi|218156315|ref|NP_001136167.1| lobe protein [Tribolium castaneum]	41.41	1e-94
c11741_g1_i1|m.9548	gi|642928044|ref|XP_008200132.1| PREDICTED: ribosome-binding protein 1-like isoform X1 [Tribolium castaneum]	45.56	3e-148
c11742_g1_i1|m.9551	gi|189236224|ref|XP_972065.2| PREDICTED: Golgi resident protein GCP60 [Tribolium castaneum]	69.98	0
c11746_g1_i1|m.9555	gi|91081511|ref|XP_974643.1| PREDICTED: vesicle-associated membrane protein 7 [Tribolium castaneum]	79.64	6e-130
c11748_g1_i1|m.9559	gi|642934887|ref|XP_008197848.1| PREDICTED: eukaryotic translation initiation factor 3 subunit G [Tribolium castaneum]	70.24	2e-143
c11749_g1_i1|m.9561	gi|91079340|ref|XP_969318.1| PREDICTED: NADH dehydrogenase [ubiquinone] flavoprotein 2, mitochondrial [Tribolium castaneum]	76.75	1e-132
c11750_g1_i1|m.9562	gi|189235535|ref|XP_972604.2| PREDICTED: cAMP-dependent protein kinase type I regulatory subunit isoform X1 [Tribolium castaneum]	93.01	0
c11750_g1_i2|m.9563	gi|642916967|ref|XP_008199574.1| PREDICTED: cAMP-dependent protein kinase type I regulatory subunit isoform X3 [Tribolium castaneum]	94.03	0
c11753_g1_i1|m.9572	gi|642927858|ref|XP_008195427.1| PREDICTED: V-type proton ATPase subunit C isoform X2 [Tribolium castaneum]	91.62	0
c11755_g1_i1|m.9573	gi|91085269|ref|XP_967005.1| PREDICTED: low-density lipoprotein receptor class A domain-containing protein 3 [Tribolium castaneum]	34.61	1e-57
c11756_g1_i2|m.9575	gi|91088711|ref|XP_975115.1| PREDICTED: solute carrier family 25 member 36-A isoform X1 [Tribolium castaneum]	73.04	0
c11757_g1_i1|m.9579	gi|642925531|ref|XP_008194589.1| PREDICTED: zinc finger protein 350-like isoform X1 [Tribolium castaneum]	73.65	0
c11760_g1_i1|m.9583	gi|642935658|ref|XP_008198103.1| PREDICTED: receptor-type tyrosine-protein phosphatase N2 [Tribolium castaneum]	63.33	0
c11761_g1_i1|m.9586	gi|91089287|ref|XP_971047.1| PREDICTED: derlin-2 [Tribolium castaneum]	82.86	4e-131
c11762_g1_i1|m.9587	gi|642933151|ref|XP_008197279.1| PREDICTED: zinc finger protein 271 isoform X1 [Tribolium castaneum]	78.7	0
c11763_g1_i1|m.9589	gi|91079692|ref|XP_968201.1| PREDICTED: transmembrane channel-like protein 7 [Tribolium castaneum]	62.78	0
c11763_g1_i1|m.9590	gi|642917827|ref|XP_968275.2| PREDICTED: ribonuclease H2 subunit C [Tribolium castaneum]	51.45	4e-47
c11764_g1_i1|m.9591	gi|91080377|ref|XP_975038.1| PREDICTED: regulator of telomere elongation helicase 1 homolog [Tribolium castaneum]	53.78	0
c11765_g2_i1|m.9593	gi|91086093|ref|XP_967267.1| PREDICTED: tubulin beta-1 chain [Tribolium castaneum]	99.55	0
c11767_g1_i1|m.9598	gi|91093137|ref|XP_969665.1| PREDICTED: breast cancer anti-estrogen resistance protein 1 isoform X1 [Tribolium castaneum]	66.88	0
c11769_g1_i1|m.9604	gi|91079298|ref|XP_966796.1| PREDICTED: putative sodium-coupled neutral amino acid transporter 10 [Tribolium castaneum]	47.67	0
c11770_g1_i1|m.9606	gi|642916900|ref|XP_008199548.1| PREDICTED: N-myc protein [Tribolium castaneum]	36.55	1e-62
c11771_g1_i1|m.9610	gi|642931661|ref|XP_008196677.1| PREDICTED: rap1 GTPase-activating protein 1 isoform X5 [Tribolium castaneum]	81.05	0
c11771_g1_i2|m.9611	gi|642931654|ref|XP_008196673.1| PREDICTED: rap1 GTPase-activating protein 1 isoform X1 [Tribolium castaneum]	74.7	0
c11772_g1_i1|m.9612	gi|642933995|ref|XP_008197596.1| PREDICTED: uncharacterized protein LOC100142086 [Tribolium castaneum]	73.45	2e-123
c11773_g1_i1|m.9613	gi|642937943|ref|XP_969804.2| PREDICTED: YTH domain-containing protein 1 [Tribolium castaneum]	81.59	0
c11774_g1_i3|m.9617	gi|642916961|ref|XP_008199572.1| PREDICTED: PAB-dependent poly(A)-specific ribonuclease subunit PAN3 [Tribolium castaneum]	65.6	0
c11777_g1_i1|m.9625	gi|642912527|ref|XP_008200900.1| PREDICTED: zinc finger C4H2 domain-containing protein isoform X2 [Tribolium castaneum]	77.78	3e-137
c11777_g1_i2|m.9626	gi|189234221|ref|XP_972511.2| PREDICTED: zinc finger C4H2 domain-containing protein isoform X1 [Tribolium castaneum]	77.24	4e-139
c11778_g1_i1|m.9627	gi|642915724|ref|XP_008190776.1| PREDICTED: serine/threonine-protein kinase VRK1 isoform X2 [Tribolium castaneum]	47.13	2e-160
c11780_g1_i1|m.9633	gi|189237966|ref|XP_001811897.1| PREDICTED: activating signal cointegrator 1 complex subunit 1 [Tribolium castaneum]	44.03	1e-82
c11783_g1_i3|m.9640	gi|642922971|ref|XP_008200474.1| PREDICTED: PR domain zinc finger protein 15-like [Tribolium castaneum]	41.95	3e-166
c11785_g1_i1|m.9642	gi|91085705|ref|XP_972760.1| PREDICTED: UBX domain-containing protein 4 [Tribolium castaneum]	52.9	6e-146
c11786_g1_i1|m.9643	gi|642930894|ref|XP_008196130.1| PREDICTED: protein phosphatase inhibitor 2-like [Tribolium castaneum]	68.39	3e-67
c11788_g1_i1|m.9647	gi|642932750|ref|XP_966509.2| PREDICTED: E3 ubiquitin-protein ligase MARCH6 [Tribolium castaneum]	72.52	0
c11789_g1_i1|m.9648	gi|91091366|ref|XP_972690.1| PREDICTED: tRNA methyltransferase 10 homolog A [Tribolium castaneum]	76.8	5e-101
c11790_g1_i1|m.9649	gi|91076346|ref|XP_966525.1| PREDICTED: leucine zipper putative tumor suppressor 2 homolog [Tribolium castaneum]	61.81	0
c11791_g1_i1|m.9651	gi|91081553|ref|XP_975065.1| PREDICTED: RWD domain-containing protein 2A [Tribolium castaneum]	65.48	4e-139
c11792_g1_i1|m.9653	gi|642910533|ref|XP_008200252.1| PREDICTED: adenylyl cyclase-associated protein 1 isoform X2 [Tribolium castaneum]	74.82	0
c11793_g1_i1|m.9654	gi|642928153|ref|XP_008200179.1| PREDICTED: bromodomain adjacent to zinc finger domain protein 1A isoform X2 [Tribolium castaneum]	47.81	0
c11794_g1_i1|m.9657	gi|189240245|ref|XP_001810808.1| PREDICTED: uncharacterized protein LOC100141766 [Tribolium castaneum]	40.98	1e-42
c11795_g1_i1|m.9658	gi|642914097|ref|XP_008201541.1| PREDICTED: uncharacterized serine-rich protein C215.13 [Tribolium castaneum]	42.99	4e-97
c11796_g1_i1|m.9659	gi|642932770|ref|XP_008196976.1| PREDICTED: uncharacterized protein LOC103314031 [Tribolium castaneum]	40.94	3e-67
c11797_g1_i1|m.9661	gi|642929822|ref|XP_975593.2| PREDICTED: pleckstrin homology domain-containing family F member 2 [Tribolium castaneum]	84.62	4e-162
c118_g1_i1|m.41	gi|642937618|ref|XP_008199124.1| PREDICTED: barH-like 1 homeobox protein [Tribolium castaneum]	88.59	9e-93
c11800_g1_i1|m.9664	gi|642927564|ref|XP_008195317.1| PREDICTED: LOW QUALITY PROTEIN: prolow-density lipoprotein receptor-related protein 1 [Tribolium castaneum]	62.82	0
c11801_g3_i1|m.9676	gi|91094485|ref|XP_970942.1| PREDICTED: protein disulfide-isomerase A5 [Tribolium castaneum]	64.86	3e-146
c11802_g2_i1|m.9677	gi|642926077|ref|XP_971220.2| PREDICTED: 39S ribosomal protein L18, mitochondrial [Tribolium castaneum]	50.57	1e-58
c11803_g1_i1|m.9678	gi|642926249|ref|XP_974073.3| PREDICTED: mannose-1-phosphate guanyltransferase beta [Tribolium castaneum]	83.43	0
c11804_g1_i1|m.9679	gi|642922855|ref|XP_008200424.1| PREDICTED: mRNA cap guanine-N7 methyltransferase [Tribolium castaneum]	71.61	0
c11805_g1_i1|m.9680	gi|189235300|ref|XP_974730.2| PREDICTED: la-related protein 7 [Tribolium castaneum]	50.4	2e-139
c11806_g1_i1|m.9681	gi|91082037|ref|XP_970725.1| PREDICTED: succinyl-CoA ligase [ADP-forming] subunit beta, mitochondrial [Tribolium castaneum]	75.62	0
c11807_g1_i1|m.9683	gi|91078814|ref|XP_970649.1| PREDICTED: ran GTPase-activating protein 1 [Tribolium castaneum]	60.08	0
c11808_g1_i1|m.9684	gi|91091348|ref|XP_972245.1| PREDICTED: solute carrier family 25 member 35 [Tribolium castaneum]	70.47	1e-162
c11809_g1_i1|m.9685	gi|91081185|ref|XP_975596.1| PREDICTED: septin-2 [Tribolium castaneum]	87.68	0
c11810_g1_i1|m.9687	gi|189238846|ref|XP_971101.2| PREDICTED: XK-related protein 7 [Tribolium castaneum]	79.11	0
c11811_g1_i2|m.9689	gi|642936508|ref|XP_008198466.1| PREDICTED: sodium-coupled monocarboxylate transporter 1 isoform X1 [Tribolium castaneum]	73.75	0
c11813_g1_i1|m.9691	gi|189241658|ref|XP_001810601.1| PREDICTED: titin-like [Tribolium castaneum]	47.53	0
c11814_g1_i1|m.9692	gi|91086657|ref|XP_967917.1| PREDICTED: proteasome subunit beta type-2 [Tribolium castaneum]	70.35	1e-109
c11815_g1_i3|m.9695	gi|91094671|ref|XP_972558.1| PREDICTED: USP6 N-terminal-like protein isoform X1 [Tribolium castaneum]	79.93	0
c11816_g1_i1|m.9696	gi|91083699|ref|XP_969478.1| PREDICTED: periostin [Tribolium castaneum]	69.23	0
c11818_g1_i2|m.9699	gi|642914703|ref|XP_008199889.1| PREDICTED: transcription initiation factor TFIID subunit 4 isoform X2 [Tribolium castaneum]	62.64	0
c11820_g1_i1|m.9702	gi|237681151|ref|NP_001153722.1| SAP domain containing ribonucleoprotein [Tribolium castaneum]	51.07	1e-64
c11821_g1_i1|m.9703	gi|642916609|ref|XP_008191874.1| PREDICTED: m7GpppX diphosphatase [Tribolium castaneum]	68.51	2e-161
c11823_g1_i1|m.9706	gi|113206046|ref|NP_001038091.1| imaginal disc growth factor 4 precursor [Tribolium castaneum]	62.12	0
c11824_g1_i1|m.9707	gi|91085297|ref|XP_968294.1| PREDICTED: DNA repair protein REV1 [Tribolium castaneum]	53.02	0
c11826_g1_i2|m.9711	gi|642937183|ref|XP_008198728.1| PREDICTED: transmembrane and ubiquitin-like domain-containing protein 1 [Tribolium castaneum]	60.96	9e-55
c11829_g1_i1|m.9713	gi|642917880|ref|XP_008191368.1| PREDICTED: uncharacterized protein LOC103312469 isoform X1 [Tribolium castaneum]	45.91	8e-111
c1183_g1_i1|m.351	gi|642940001|ref|XP_008198792.1| PREDICTED: uncharacterized protein LOC103314449 [Tribolium castaneum]	36.18	5e-63
c11830_g1_i1|m.9714	gi|91081779|ref|XP_973526.1| PREDICTED: ATP-binding cassette sub-family G member 1 [Tribolium castaneum]	58.73	0
c11832_g1_i3|m.9717	gi|642919164|ref|XP_008191764.1| PREDICTED: forkhead box protein N3-like isoform X2 [Tribolium castaneum]	68.9	0
c11833_g1_i1|m.9718	gi|642937810|ref|XP_008200310.1| PREDICTED: leucine-rich repeat-containing protein 15 [Tribolium castaneum]	60.38	1e-160
c11834_g1_i2|m.9720	gi|91078052|ref|XP_971201.1| PREDICTED: mitochondrial import inner membrane translocase subunit Tim17-B-like [Tribolium castaneum]	88.17	3e-105
c11836_g1_i1|m.9722	gi|642923865|ref|XP_966645.3| PREDICTED: TBC1 domain family member 20 isoform X2 [Tribolium castaneum]	68.2	0
c11837_g1_i1|m.9724	gi|91081433|ref|XP_973525.1| PREDICTED: zinc finger protein 622 [Tribolium castaneum]	63.56	3e-176
c11838_g1_i1|m.9725	gi|91080903|ref|XP_973591.1| PREDICTED: protein lethal(2)denticleless [Tribolium castaneum]	43.09	7e-164
c11840_g1_i2|m.9727	gi|642915092|ref|XP_969315.3| PREDICTED: probable uridine-cytidine kinase isoform X2 [Tribolium castaneum]	78.6	9e-141
c11840_g1_i3|m.9728	gi|642915090|ref|XP_008190408.1| PREDICTED: probable uridine-cytidine kinase isoform X1 [Tribolium castaneum]	72.66	1e-142
c11841_g1_i1|m.9729	gi|642910515|ref|XP_971774.3| PREDICTED: leucine-rich repeats and immunoglobulin-like domains protein 2 isoform X2 [Tribolium castaneum]	63.25	0
c11842_g1_i1|m.9730	gi|642932796|ref|XP_008196987.1| PREDICTED: dual specificity mitogen-activated protein kinase kinase 4 isoform X3 [Tribolium castaneum]	78.22	0
c11842_g1_i2|m.9731	gi|642932794|ref|XP_974082.2| PREDICTED: dual specificity mitogen-activated protein kinase kinase 4 isoform X2 [Tribolium castaneum]	77.78	0
c11843_g1_i1|m.9732	gi|642914052|ref|XP_969243.3| PREDICTED: sorting nexin-6 isoform X2 [Tribolium castaneum]	88.1	0
c11844_g1_i1|m.9733	gi|91077950|ref|XP_966973.1| PREDICTED: proteasome subunit alpha type-1 [Tribolium castaneum]	78.09	6e-161
c11845_g1_i1|m.9734	gi|225543470|ref|NP_001139383.1| serum response factor [Tribolium castaneum]	91.84	0
c11845_g1_i3|m.9736	gi|642912445|ref|XP_008200863.1| PREDICTED: serum response factor isoform X1 [Tribolium castaneum]	72.53	2e-179
c11846_g1_i1|m.9737	gi|642933598|ref|XP_008197488.1| PREDICTED: NFU1 iron-sulfur cluster scaffold homolog, mitochondrial isoform X1 [Tribolium castaneum]	75	4e-135
c11847_g1_i1|m.9738	gi|91080515|ref|XP_971732.1| PREDICTED: galectin-8-like [Tribolium castaneum]	49.85	2e-115
c11849_g1_i1|m.9741	gi|91091570|ref|XP_967396.1| PREDICTED: pre-mRNA-processing factor 17 [Tribolium castaneum]	77.87	0
c1185_g1_i1|m.352	gi|642912602|ref|XP_008200928.1| PREDICTED: poly(A) RNA polymerase gld-2 homolog A-like [Tribolium castaneum]	48.9	4e-48
c11850_g1_i1|m.9742	gi|642928077|ref|XP_008200146.1| PREDICTED: homer protein homolog 2 [Tribolium castaneum]	79.02	0
c11852_g1_i1|m.9744	gi|91078056|ref|XP_971325.1| PREDICTED: endoplasmic reticulum lectin 1 [Tribolium castaneum]	67.17	0
c11856_g1_i1|m.9750	gi|91090606|ref|XP_973086.1| PREDICTED: peroxisomal membrane protein PEX14 [Tribolium castaneum]	55.78	2e-90
c11858_g1_i1|m.9752	gi|91077066|ref|XP_969171.1| PREDICTED: T-complex protein 1 subunit alpha [Tribolium castaneum]	88.87	0
c11858_g1_i1|m.9753	gi|642913383|ref|XP_969242.3| PREDICTED: valacyclovir hydrolase [Tribolium castaneum]	57.95	2e-112
c11859_g1_i1|m.9755	gi|642928515|ref|XP_008193823.1| PREDICTED: protein C-ets-2 [Tribolium castaneum]	96.52	4e-80
c11859_g1_i4|m.9760	gi|642928513|ref|XP_008193822.1| PREDICTED: uncharacterized protein LOC659984 [Tribolium castaneum]	62.37	0
c11860_g1_i1|m.9762	gi|91095139|ref|XP_973052.1| PREDICTED: methyltransferase-like protein 16 homolog [Tribolium castaneum]	53.62	4e-179
c11861_g1_i1|m.9764	gi|91076104|ref|XP_968648.1| PREDICTED: 1,4-alpha-glucan-branching enzyme [Tribolium castaneum]	76.27	0
c11862_g1_i2|m.9769	gi|642926413|ref|XP_008191952.1| PREDICTED: uncharacterized protein LOC659527 isoform X1 [Tribolium castaneum]	70.53	0
c11864_g1_i1|m.9773	gi|642923223|ref|XP_008193662.1| PREDICTED: uncharacterized protein LOC658939 [Tribolium castaneum]	60.68	8e-90
c11865_g1_i1|m.9774	gi|91082441|ref|XP_971024.1| PREDICTED: immunoglobulin-binding protein 1 [Tribolium castaneum]	59.77	3e-140
c11866_g1_i1|m.9775	gi|642921155|ref|XP_975421.2| PREDICTED: nitrilase and fragile histidine triad fusion protein NitFhit [Tribolium castaneum]	53.78	2e-176
c11867_g2_i1|m.9776	gi|642935586|ref|XP_008198071.1| PREDICTED: cAMP-specific 3',5'-cyclic phosphodiesterase, isoform M isoform X9 [Tribolium castaneum]	90.92	0
c11868_g1_i5|m.9790	gi|642928829|ref|XP_008195578.1| PREDICTED: protein VAC14 homolog [Tribolium castaneum]	73.81	0
c11868_g1_i5|m.9791	gi|642929239|ref|XP_008195748.1| PREDICTED: uncharacterized protein LOC103313667 isoform X1 [Tribolium castaneum]	40	5e-37
c11870_g1_i1|m.9793	gi|91086635|ref|XP_966565.1| PREDICTED: U11/U12 small nuclear ribonucleoprotein 35 kDa protein [Tribolium castaneum]	75.98	2e-99
c11873_g1_i1|m.9797	gi|642928976|ref|XP_008195642.1| PREDICTED: probable GPI-anchored adhesin-like protein PGA55 [Tribolium castaneum]	29.21	3e-64
c11874_g1_i2|m.9799	gi|91079776|ref|XP_967502.1| PREDICTED: coiled-coil domain-containing protein 50 [Tribolium castaneum]	57.9	4e-161
c11875_g1_i1|m.9800	gi|642925505|ref|XP_008194578.1| PREDICTED: very-long-chain (3R)-3-hydroxyacyl-[acyl-carrier protein] dehydratase [Tribolium castaneum]	52.17	2e-144
c11876_g1_i1|m.9801	gi|642910357|ref|XP_008200291.1| PREDICTED: LOW QUALITY PROTEIN: serine/threonine-protein kinase Genghis Khan [Tribolium castaneum]	80.36	0
c11879_g1_i1|m.9805	gi|91078372|ref|XP_974116.1| PREDICTED: uncharacterized protein C9orf78 [Tribolium castaneum]	64.54	2e-117
c11882_g1_i1|m.9810	gi|189236619|ref|XP_001816527.1| PREDICTED: N-alpha-acetyltransferase 20 [Tribolium castaneum]	93.06	2e-120
c11883_g1_i1|m.9811	gi|91081359|ref|XP_971395.1| PREDICTED: tumor suppressor candidate 3 [Tribolium castaneum]	82.93	0
c11886_g1_i1|m.9813	gi|91080569|ref|XP_973391.1| PREDICTED: kinesin-like protein costa isoform X2 [Tribolium castaneum]	50.16	0
c11888_g1_i1|m.9817	gi|642917912|ref|XP_008191379.1| PREDICTED: UDP-glucuronosyltransferase 2B7 [Tribolium castaneum]	50.71	1e-176
c11888_g1_i1|m.9818	gi|642939617|ref|XP_008193743.1| PREDICTED: mitochondrial cardiolipin hydrolase-like [Tribolium castaneum]	39.71	2e-45
c11889_g1_i1|m.9819	gi|642931374|ref|XP_008196552.1| PREDICTED: transmembrane channel-like protein 7 isoform X1 [Tribolium castaneum]	45.11	0
c11890_g1_i1|m.9820	gi|91080941|ref|XP_974301.1| PREDICTED: FGFR1 oncogene partner 2 homolog [Tribolium castaneum]	66.83	1e-90
c11891_g1_i1|m.9822	gi|91087667|ref|XP_973701.1| PREDICTED: deoxyuridine 5'-triphosphate nucleotidohydrolase [Tribolium castaneum]	78.91	5e-84
c11893_g1_i2|m.9824	gi|642930185|ref|XP_008196291.1| PREDICTED: adenosine deaminase-like protein [Tribolium castaneum]	53.31	9e-117
c11894_g1_i2|m.9826	gi|91084249|ref|XP_970187.1| PREDICTED: platelet-activating factor acetylhydrolase IB subunit beta homolog [Tribolium castaneum]	57.47	1e-87
c11896_g1_i1|m.9829	gi|91086777|ref|XP_972763.1| PREDICTED: elongation factor Tu, mitochondrial-like [Tribolium castaneum]	65.84	0
c11897_g1_i1|m.9832	gi|91080745|ref|XP_966455.1| PREDICTED: fatty acid hydroxylase domain-containing protein 2 isoform X1 [Tribolium castaneum]	77.25	0
c11898_g1_i1|m.9833	gi|91086397|ref|XP_974845.1| PREDICTED: kaptin-like [Tribolium castaneum]	52.28	1e-145
c11899_g1_i1|m.9836	gi|91079600|ref|XP_968514.1| PREDICTED: transcription initiation factor TFIID subunit 7 [Tribolium castaneum]	76.69	0
c11900_g1_i1|m.9837	gi|91086943|ref|XP_972716.1| PREDICTED: G patch domain-containing protein 4 [Tribolium castaneum]	49.67	2e-72
c11902_g1_i1|m.9843	gi|642922942|ref|XP_008200462.1| PREDICTED: GRIP and coiled-coil domain-containing protein 2 [Tribolium castaneum]	56.37	0
c11905_g1_i1|m.9866	gi|91083607|ref|XP_969406.1| PREDICTED: solute carrier family 25 member 44 [Tribolium castaneum]	75.39	4e-179
c11906_g1_i1|m.9867	gi|189236728|ref|XP_974937.2| PREDICTED: ATP-dependent (S)-NAD(P)H-hydrate dehydratase [Tribolium castaneum]	57.49	2e-116
c11907_g1_i1|m.9868	gi|91094947|ref|XP_968721.1| PREDICTED: protein DENND6A [Tribolium castaneum]	73.05	0
c11908_g1_i1|m.9870	gi|642937253|ref|XP_008198758.1| PREDICTED: probable ATP-dependent RNA helicase YTHDC2 isoform X2 [Tribolium castaneum]	35.76	0
c11909_g1_i1|m.9871	gi|642922240|ref|XP_008193073.1| PREDICTED: sodium/potassium-transporting ATPase subunit beta-2 isoform X1 [Tribolium castaneum]	68.84	1e-163
c11909_g1_i2|m.9872	gi|642922242|ref|XP_008193074.1| PREDICTED: sodium/potassium-transporting ATPase subunit beta-2 isoform X2 [Tribolium castaneum]	69.06	8e-159
c1191_g1_i1|m.353	gi|91083935|ref|XP_974856.1| PREDICTED: protein Dr1 [Tribolium castaneum]	85.47	8e-90
c11910_g1_i1|m.9873	gi|189241033|ref|XP_971712.2| PREDICTED: probable peptide chain release factor C12orf65, mitochondrial [Tribolium castaneum]	62.5	2e-55
c11911_g1_i1|m.9874	gi|91090165|ref|XP_972645.1| PREDICTED: probable prefoldin subunit 4 [Tribolium castaneum]	67.91	8e-61
c11912_g1_i1|m.9875	gi|91089519|ref|XP_970680.1| PREDICTED: deoxyhypusine hydroxylase [Tribolium castaneum]	70.86	5e-155
c11912_g1_i1|m.9876	gi|642933404|ref|XP_008197403.1| PREDICTED: probable 28S ribosomal protein S23, mitochondrial [Tribolium castaneum]	54.88	7e-67
c11913_g2_i1|m.9880	gi|91093803|ref|XP_968404.1| PREDICTED: inositol polyphosphate 1-phosphatase [Tribolium castaneum]	50.27	4e-118
c11915_g1_i1|m.9890	gi|642930472|ref|XP_008196416.1| PREDICTED: LOW QUALITY PROTEIN: papilin-like [Tribolium castaneum]	48.29	0
c11916_g1_i2|m.9893	gi|91076808|ref|XP_974319.1| PREDICTED: myelin expression factor 2 [Tribolium castaneum]	57.74	0
c11919_g1_i2|m.9896	gi|642927743|ref|XP_008195388.1| PREDICTED: uncharacterized protein LOC657278 [Tribolium castaneum]	70.43	0
c11920_g1_i1|m.9897	gi|642926997|ref|XP_008195097.1| PREDICTED: mitotic spindle assembly checkpoint protein MAD1 [Tribolium castaneum]	56.03	0
c11922_g1_i2|m.9900	gi|642928571|ref|XP_008199962.1| PREDICTED: S-methyl-5'-thioadenosine phosphorylase [Tribolium castaneum]	69.85	6e-135
c11923_g1_i1|m.9901	gi|189239759|ref|XP_001807559.1| PREDICTED: transcription factor MafK [Tribolium castaneum]	72.39	5e-66
c11924_g1_i1|m.9902	gi|91085293|ref|XP_968143.1| PREDICTED: spermine synthase [Tribolium castaneum]	68.58	1e-132
c11925_g2_i1|m.9906	gi|642924532|ref|XP_008194334.1| PREDICTED: junctophilin-1 isoform X1 [Tribolium castaneum]	72.91	0
c11925_g3_i1|m.9910	gi|91084283|ref|XP_966860.1| PREDICTED: larval cuticle protein A2B [Tribolium castaneum]	62.42	3e-55
c11926_g1_i1|m.9913	gi|91084999|ref|XP_973197.1| PREDICTED: TBC1 domain family member 10A [Tribolium castaneum]	75.29	0
c11927_g1_i1|m.9914	gi|91089427|ref|XP_974449.1| PREDICTED: switch-associated protein 70 [Tribolium castaneum]	71.86	0
c11928_g1_i1|m.9915	gi|642932059|ref|XP_008196842.1| PREDICTED: protein lin-54 homolog isoform X2 [Tribolium castaneum]	53.22	0
c11929_g1_i1|m.9917	gi|189236157|ref|XP_975017.2| PREDICTED: ets DNA-binding protein pokkuri [Tribolium castaneum]	79.3	0
c11931_g1_i1|m.9926	gi|91077374|ref|XP_975191.1| PREDICTED: dnaJ homolog subfamily C member 8 [Tribolium castaneum]	79.67	9e-120
c11932_g1_i1|m.9927	gi|642920194|ref|XP_008192243.1| PREDICTED: probable protein phosphatase 2C T23F11.1 [Tribolium castaneum]	74.67	3e-175
c11933_g1_i1|m.9929	gi|91082667|ref|XP_966596.1| PREDICTED: uncharacterized protein LOC659832 [Tribolium castaneum]	50.89	8e-78
c11934_g1_i1|m.9930	gi|91080513|ref|XP_971680.1| PREDICTED: beta-1,3-glucan-binding protein 2 [Tribolium castaneum]	34.26	5e-45
c11936_g1_i3|m.9935	gi|642911174|ref|XP_008200611.1| PREDICTED: E3 ubiquitin-protein ligase KCMF1 isoform X2 [Tribolium castaneum]	73.22	8e-160
c11937_g1_i2|m.9938	gi|189234051|ref|XP_001809969.1| PREDICTED: solute carrier family 12 member 8 [Tribolium castaneum]	75.04	0
c11938_g1_i2|m.9949	gi|642926407|ref|XP_008191950.1| PREDICTED: homeobox protein cut-like [Tribolium castaneum]	73.58	0
c11939_g1_i1|m.9955	gi|91076666|ref|XP_971444.1| PREDICTED: geranylgeranyl pyrophosphate synthase [Tribolium castaneum]	73.62	2e-170
c11939_g1_i1|m.9956	gi|91077876|ref|XP_972781.1| PREDICTED: mediator of RNA polymerase II transcription subunit 4 [Tribolium castaneum]	85.83	1e-151
c11941_g1_i1|m.9958	gi|642918076|ref|XP_008193899.1| PREDICTED: protein arginine N-methyltransferase 7 isoform X2 [Tribolium castaneum]	53.53	0
c11942_g1_i1|m.9959	gi|642928804|ref|XP_008195569.1| PREDICTED: uncharacterized protein LOC655785 [Tribolium castaneum]	61.1	1e-171
c11943_g1_i1|m.9960	gi|91083531|ref|XP_973193.1| PREDICTED: carbonyl reductase [NADPH] 1 [Tribolium castaneum]	68.46	1e-136
c11944_g1_i1|m.9961	gi|642936644|ref|XP_008198521.1| PREDICTED: kinesin heavy chain [Tribolium castaneum]	89.05	0
c11946_g1_i2|m.9966	gi|189240236|ref|XP_001811057.1| PREDICTED: calcium-binding mitochondrial carrier protein SCaMC-2 [Tribolium castaneum]	81.82	0
c11946_g2_i1|m.9968	gi|91088801|ref|XP_968770.1| PREDICTED: 6-phosphogluconolactonase [Tribolium castaneum]	59.31	4e-96
c11947_g1_i1|m.9969	gi|642922875|ref|XP_008200434.1| PREDICTED: uncharacterized protein LOC103314918 [Tribolium castaneum]	41.06	5e-82
c11948_g1_i2|m.9972	gi|189240888|ref|XP_001815244.1| PREDICTED: uncharacterized protein LOC100142079 [Tribolium castaneum]	47.04	1e-95
c11950_g1_i1|m.9973	gi|91081077|ref|XP_975460.1| PREDICTED: UPF0587 protein CG4646 [Tribolium castaneum]	57.76	2e-68
c11952_g1_i1|m.9975	gi|642938557|ref|XP_008199841.1| PREDICTED: catenin delta-2 isoform X1 [Tribolium castaneum]	88.4	0
c11953_g1_i1|m.9989	gi|91079236|ref|XP_970901.1| PREDICTED: tubulin-specific chaperone E [Tribolium castaneum]	50.19	1e-176
c11954_g1_i2|m.9991	gi|642920758|ref|XP_971086.2| PREDICTED: protein-L-isoaspartate(D-aspartate) O-methyltransferase [Tribolium castaneum]	71.05	4e-118
c11955_g1_i2|m.9993	gi|642918008|ref|XP_008198978.1| PREDICTED: E3 ubiquitin-protein ligase rnf146 [Tribolium castaneum]	65.02	2e-102
c11956_g1_i1|m.9994	gi|642931948|ref|XP_008196790.1| PREDICTED: protein deltex [Tribolium castaneum]	70.18	0
c11958_g1_i1|m.9997	gi|642920312|ref|XP_008192294.1| PREDICTED: mitochondrial import inner membrane translocase subunit Tim9 [Tribolium castaneum]	76.77	6e-53
c11959_g1_i1|m.9998	gi|189238877|ref|XP_973702.2| PREDICTED: transcription factor IIIB 90 kDa subunit [Tribolium castaneum]	64.85	0
c11960_g1_i1|m.10000	gi|642921322|ref|XP_008192820.1| PREDICTED: ETS-related transcription factor Elf-5-like isoform X2 [Tribolium castaneum]	53.85	8e-40
c11962_g1_i2|m.10008	gi|91092222|ref|XP_970406.1| PREDICTED: Golgi phosphoprotein 3 homolog rotini [Tribolium castaneum]	91.26	0
c11964_g1_i1|m.10010	gi|91084969|ref|XP_972023.1| PREDICTED: SWI/SNF-related matrix-associated actin-dependent regulator of chromatin subfamily B member 1 [Tribolium castaneum]	88.68	0
c11965_g1_i1|m.10011	gi|91077572|ref|XP_972780.1| PREDICTED: 39S ribosomal protein L46, mitochondrial [Tribolium castaneum]	54.72	7e-93
c11966_g1_i1|m.10012	gi|91079744|ref|XP_970506.1| PREDICTED: probable medium-chain specific acyl-CoA dehydrogenase, mitochondrial [Tribolium castaneum]	77.19	0
c11968_g1_i1|m.10016	gi|91085407|ref|XP_967344.1| PREDICTED: peroxisome assembly protein 12 [Tribolium castaneum]	55.86	1e-117
c11971_g1_i1|m.10021	gi|189237379|ref|XP_001814267.1| PREDICTED: uncharacterized protein LOC100142033 [Tribolium castaneum]	25.36	3e-14
c11972_g1_i7|m.10034	gi|642923805|ref|XP_008193890.1| PREDICTED: RNA-binding protein 39 [Tribolium castaneum]	90.51	0
c11973_g1_i1|m.10040	gi|189233731|ref|XP_971025.2| PREDICTED: kinesin-like protein KIF3A [Tribolium castaneum]	72.67	0
c11975_g1_i1|m.10042	gi|642935823|ref|XP_008198190.1| PREDICTED: serine--pyruvate aminotransferase, mitochondrial [Tribolium castaneum]	66.41	0
c11976_g1_i1|m.10043	gi|642925222|ref|XP_001811901.2| PREDICTED: COMM domain-containing protein 3 isoform X1 [Tribolium castaneum]	51.52	3e-59
c11978_g1_i3|m.10050	gi|91095137|ref|XP_972151.1| PREDICTED: calcium release-activated calcium channel protein 1 [Tribolium castaneum]	75.39	2e-131
c11980_g1_i1|m.10053	gi|642932266|ref|XP_008197039.1| PREDICTED: mpv17-like protein isoform X1 [Tribolium castaneum]	61.58	9e-82
c11981_g1_i2|m.10054	gi|642932872|ref|XP_008197020.1| PREDICTED: LOW QUALITY PROTEIN: DNA polymerase delta subunit 2 [Tribolium castaneum]	53.88	1e-163
c11983_g1_i2|m.10061	gi|642912209|ref|XP_008200855.1| PREDICTED: early growth response protein 1-B isoform X1 [Tribolium castaneum]	70.27	0
c11983_g1_i3|m.10063	gi|642912211|ref|XP_008200856.1| PREDICTED: early growth response protein 1-B isoform X2 [Tribolium castaneum]	64.31	0
c11984_g1_i1|m.10065	gi|642934522|ref|XP_001812598.2| PREDICTED: O-acetyl-ADP-ribose deacetylase MACROD2-like [Tribolium castaneum]	60.92	1e-108
c11985_g1_i2|m.10067	gi|642929593|ref|XP_008195897.1| PREDICTED: peptide-N(4)-(N-acetyl-beta-glucosaminyl)asparagine amidase isoform X1 [Tribolium castaneum]	48.14	0
c11987_g1_i1|m.10071	gi|642918139|ref|XP_008191383.1| PREDICTED: hepatic leukemia factor-like, partial [Tribolium castaneum]	86.08	7e-172
c11988_g1_i1|m.10074	gi|642916567|ref|XP_972160.2| PREDICTED: solute carrier family 35 member C2 [Tribolium castaneum]	58.44	3e-153
c11989_g1_i5|m.10080	gi|642918771|ref|XP_008191577.1| PREDICTED: calpain-D-like isoform X1 [Tribolium castaneum]	65.35	0
c11991_g1_i4|m.10084	gi|642913478|ref|XP_008201029.1| PREDICTED: dolichol kinase [Tribolium castaneum]	47.61	2e-136
c11993_g1_i1|m.10086	gi|269995911|ref|NP_001161778.1| yellow-c precursor [Tribolium castaneum]	66.15	0
c11995_g1_i1|m.10089	gi|642913029|ref|XP_008201358.1| PREDICTED: DNA damage-regulated autophagy modulator protein 2-like [Tribolium castaneum]	35.66	4e-51
c11996_g1_i1|m.10090	gi|91088645|ref|XP_974426.1| PREDICTED: calcium-binding and coiled-coil domain-containing protein 2 [Tribolium castaneum]	39.7	3e-48
c11997_g1_i1|m.10091	gi|91091194|ref|XP_972244.1| PREDICTED: superoxide dismutase [Cu-Zn] [Tribolium castaneum]	71.12	5e-96
c11998_g1_i1|m.10092	gi|189240067|ref|XP_970199.2| PREDICTED: monocarboxylate transporter 13 [Tribolium castaneum]	70.12	0
c11999_g1_i1|m.10096	gi|91090384|ref|XP_969497.1| PREDICTED: 6-phosphofructo-2-kinase/fructose-2,6-bisphosphatase 1 isoform X1 [Tribolium castaneum]	82.96	0
c11999_g1_i3|m.10098	gi|642935114|ref|XP_008197893.1| PREDICTED: 6-phosphofructo-2-kinase/fructose-2,6-bisphosphatase 1 isoform X2 [Tribolium castaneum]	82.88	0
c11999_g1_i4|m.10099	gi|642935118|ref|XP_008197895.1| PREDICTED: 6-phosphofructo-2-kinase/fructose-2,6-bisphosphatase 1 isoform X4 [Tribolium castaneum]	84.89	0
c120_g1_i1|m.42	gi|642938815|ref|XP_008199930.1| PREDICTED: uncharacterized protein LOC103314794 isoform X1 [Tribolium castaneum]	35.16	3e-66
c12000_g1_i1|m.10100	gi|642931571|ref|XP_008196639.1| PREDICTED: gamma-glutamyltranspeptidase 1 isoform X2 [Tribolium castaneum]	53.03	0
c12003_g1_i1|m.10109	gi|642918082|ref|XP_008193932.1| PREDICTED: protein disulfide-isomerase TMX3 [Tribolium castaneum]	71.15	0
c12005_g1_i1|m.10112	gi|91082887|ref|XP_971801.1| PREDICTED: golgin subfamily A member 1 isoform X2 [Tribolium castaneum]	71.58	6e-166
c12006_g1_i1|m.10114	gi|282158095|ref|NP_001164091.1| HIF prolyl hydroxylase [Tribolium castaneum]	65.52	2e-180
c12007_g1_i1|m.10116	gi|91080139|ref|XP_968438.1| PREDICTED: polyphosphoinositide phosphatase [Tribolium castaneum]	69.79	0
c12008_g1_i1|m.10117	gi|91087845|ref|XP_968149.1| PREDICTED: ankyrin repeat domain-containing protein 16 [Tribolium castaneum]	45.69	3e-83
c12009_g1_i1|m.10119	gi|91079008|ref|XP_974790.1| PREDICTED: ubiquitin-conjugating enzyme E2 W [Tribolium castaneum]	90.26	2e-104
c12010_g1_i2|m.10120	gi|91088359|ref|XP_971758.1| PREDICTED: protein tramtrack, beta isoform-like isoform X2 [Tribolium castaneum]	56.08	3e-125
c12011_g1_i4|m.10128	gi|642911461|ref|XP_008199432.1| PREDICTED: MAP7 domain-containing protein 1-like isoform X2 [Tribolium castaneum]	58.94	0
c12011_g1_i7|m.10134	gi|91092746|ref|XP_973314.1| PREDICTED: MAP7 domain-containing protein 1-like isoform X5 [Tribolium castaneum]	57.45	1e-162
c12012_g1_i1|m.10136	gi|642937420|ref|XP_008198829.1| PREDICTED: protein suppressor of hairy wing [Tribolium castaneum]	60.47	0
c12013_g1_i1|m.10137	gi|91093989|ref|XP_970414.1| PREDICTED: golgin-45 [Tribolium castaneum]	59.79	6e-148
c12015_g1_i3|m.10146	gi|642929679|ref|XP_975498.3| PREDICTED: metastasis-associated protein MTA3 isoform X2 [Tribolium castaneum]	85.58	0
c12015_g1_i4|m.10148	gi|642929677|ref|XP_008195933.1| PREDICTED: metastasis-associated protein MTA3 isoform X1 [Tribolium castaneum]	85.77	0
c12017_g1_i1|m.10152	gi|91090053|ref|XP_968775.1| PREDICTED: sn1-specific diacylglycerol lipase beta [Tribolium castaneum]	80.35	0
c12018_g1_i2|m.10155	gi|91091508|ref|XP_969167.1| PREDICTED: protein LMBR1L isoform X2 [Tribolium castaneum]	75.19	0
c12019_g1_i1|m.10157	gi|91087761|ref|XP_974991.1| PREDICTED: proteasome subunit beta type-4 [Tribolium castaneum]	70.98	4e-137
c12020_g1_i2|m.10159	gi|91088775|ref|XP_967272.1| PREDICTED: peptide methionine sulfoxide reductase [Tribolium castaneum]	63.76	4e-105
c12021_g1_i1|m.10160	gi|642919677|ref|XP_968051.2| PREDICTED: uncharacterized protein LOC656425 [Tribolium castaneum]	43.93	5e-119
c12022_g1_i1|m.10161	gi|91078944|ref|XP_974036.1| PREDICTED: hamartin [Tribolium castaneum]	50	1e-162
c12023_g1_i1|m.10162	gi|642916946|ref|XP_008199566.1| PREDICTED: FGFR1 oncogene partner [Tribolium castaneum]	45.86	1e-62
c12024_g1_i2|m.10164	gi|91076530|ref|XP_973684.1| PREDICTED: DDB1- and CUL4-associated factor 12 [Tribolium castaneum]	78.63	0
c12025_g1_i2|m.10166	gi|91094937|ref|XP_966941.1| PREDICTED: protein phosphatase 1H [Tribolium castaneum]	73.54	0
c12026_g1_i1|m.10169	gi|189241108|ref|XP_972242.2| PREDICTED: U3 small nucleolar ribonucleoprotein protein IMP4 isoform X1 [Tribolium castaneum]	84.42	0
c12027_g1_i1|m.10170	gi|642916163|ref|XP_008190912.1| PREDICTED: abhydrolase domain-containing protein 16A [Tribolium castaneum]	62.99	0
c12029_g1_i1|m.10175	gi|91092160|ref|XP_967690.1| PREDICTED: RNA-binding protein 24-B [Tribolium castaneum]	85.36	1e-131
c12030_g1_i2|m.10178	gi|642913051|ref|XP_008201367.1| PREDICTED: tRNA (guanine(10)-N2)-methyltransferase homolog [Tribolium castaneum]	65	0
c12031_g1_i3|m.10181	gi|642936769|ref|XP_008198572.1| PREDICTED: general transcription factor IIF subunit 1 isoform X2 [Tribolium castaneum]	75.76	2e-161
c12032_g1_i1|m.10182	gi|642925282|ref|XP_008194490.1| PREDICTED: protein unc-119 homolog [Tribolium castaneum]	76.42	6e-118
c12034_g1_i1|m.10187	gi|91084939|ref|XP_971157.1| PREDICTED: gamma-interferon-inducible lysosomal thiol reductase [Tribolium castaneum]	46.67	3e-75
c12036_g1_i1|m.10189	gi|642934707|ref|XP_973046.2| PREDICTED: vacuolar protein sorting-associated protein 54 [Tribolium castaneum]	72.71	0
c12037_g1_i1|m.10190	gi|91086239|ref|XP_972538.1| PREDICTED: squamous cell carcinoma antigen recognized by T-cells 3 [Tribolium castaneum]	46.5	0
c12038_g1_i1|m.10191	gi|91085131|ref|XP_969556.1| PREDICTED: peptidoglycan-recognition protein LB isoform X1 [Tribolium castaneum]	59.12	7e-73
c12039_g1_i2|m.10195	gi|642924384|ref|XP_008194273.1| PREDICTED: WD repeat-containing protein 59 [Tribolium castaneum]	64.56	0
c12040_g1_i1|m.10197	gi|91082307|ref|XP_974197.1| PREDICTED: inosine triphosphate pyrophosphatase [Tribolium castaneum]	70.21	9e-98
c12041_g1_i2|m.10198	gi|642924021|ref|XP_008193973.1| PREDICTED: neuroparsin-A-like [Tribolium castaneum]	43.14	1e-25
c12042_g1_i1|m.10199	gi|642917712|ref|XP_008191341.1| PREDICTED: kielin/chordin-like protein [Tribolium castaneum]	40.05	8e-94
c12043_g2_i1|m.10201	gi|642917749|ref|XP_008191355.1| PREDICTED: exonuclease mut-7 homolog [Tribolium castaneum]	55.54	0
c12045_g2_i2|m.10208	gi|642919553|ref|XP_008191920.1| PREDICTED: UPF0483 protein AGAP003155 [Tribolium castaneum]	65.33	3e-107
c12046_g1_i1|m.10209	gi|642934001|ref|XP_973480.2| PREDICTED: wolframin isoform X1 [Tribolium castaneum]	57.41	0
c12047_g1_i1|m.10210	gi|91076490|ref|XP_972861.1| PREDICTED: CD81 antigen-like [Tribolium castaneum]	37.07	3e-50
c12048_g1_i1|m.10212	gi|642920450|ref|XP_975645.2| PREDICTED: nuclear factor related to kappa-B-binding protein isoform X2 [Tribolium castaneum]	52.15	0
c12049_g1_i1|m.10213	gi|91086123|ref|XP_968375.1| PREDICTED: nuclear inhibitor of protein phosphatase 1 [Tribolium castaneum]	78.4	0
c1205_g1_i1|m.358	gi|91085767|ref|XP_974204.1| PREDICTED: glutathione S-transferase 1, isoform D [Tribolium castaneum]	68.64	5e-115
c12050_g1_i2|m.10215	gi|642924268|ref|XP_001809587.2| PREDICTED: zinc finger protein 2 homolog [Tribolium castaneum]	53.98	0
c12051_g1_i1|m.10216	gi|642935773|ref|XP_966401.2| PREDICTED: trafficking protein particle complex subunit 10 [Tribolium castaneum]	65.3	0
c12053_g1_i4|m.10221	gi|642913420|ref|XP_008201004.1| PREDICTED: molybdenum cofactor biosynthesis protein 1-like [Tribolium castaneum]	51.2	8e-46
c12054_g1_i2|m.10223	gi|642930706|ref|XP_008199995.1| PREDICTED: hepatocyte growth factor-regulated tyrosine kinase substrate [Tribolium castaneum]	71.7	1e-121
c12055_g1_i1|m.10225	gi|189239820|ref|XP_971534.2| PREDICTED: putative fatty acyl-CoA reductase CG5065 [Tribolium castaneum]	51.77	0
c12057_g1_i1|m.10230	gi|642912127|ref|XP_008200819.1| PREDICTED: uncharacterized protein LOC100141711 [Tribolium castaneum]	27.27	7e-54
c12058_g1_i1|m.10231	gi|642919751|ref|XP_008192050.1| PREDICTED: nucleosome assembly protein 1-like 1 [Tribolium castaneum]	59.63	6e-148
c12059_g1_i1|m.10232	gi|642937369|ref|XP_008198809.1| PREDICTED: ATP-dependent helicase brm isoform X3 [Tribolium castaneum]	78.55	0
c12059_g1_i2|m.10234	gi|642937367|ref|XP_008198808.1| PREDICTED: ATP-dependent helicase brm isoform X2 [Tribolium castaneum]	77.37	0
c1206_g2_i1|m.360	gi|189238915|ref|XP_969200.2| PREDICTED: DNA polymerase epsilon catalytic subunit A [Tribolium castaneum]	87.32	8e-120
c12060_g1_i1|m.10237	gi|642935391|ref|XP_008197992.1| PREDICTED: protein expanded [Tribolium castaneum]	73.39	0
c12062_g1_i1|m.10242	gi|642933239|ref|XP_008197324.1| PREDICTED: titin-like [Tribolium castaneum]	52.81	2e-85
c12063_g1_i2|m.10243	gi|642928994|ref|XP_008195648.1| PREDICTED: eukaryotic translation elongation factor 1 epsilon-1 [Tribolium castaneum]	49.13	3e-55
c12064_g1_i1|m.10244	gi|91078136|ref|XP_973521.1| PREDICTED: heat shock 70 kDa protein cognate 2 [Tribolium castaneum]	87.16	0
c12065_g1_i1|m.10245	gi|642928372|ref|XP_008192716.1| PREDICTED: protein bunched, class 2/F/G isoform [Tribolium castaneum]	51.8	2e-146
c12066_g1_i1|m.10247	gi|91088023|ref|XP_974181.1| PREDICTED: glyceraldehyde-3-phosphate dehydrogenase 2 [Tribolium castaneum]	87.09	0
c12067_g1_i1|m.10249	gi|642939031|ref|XP_968250.2| PREDICTED: protein ariadne-1 [Tribolium castaneum]	84.63	0
c12069_g1_i1|m.10252	gi|91082269|ref|XP_973494.1| PREDICTED: eukaryotic translation initiation factor 4E-1A [Tribolium castaneum]	71.43	1e-113
c1207_g1_i1|m.361	gi|91090904|ref|XP_973747.1| PREDICTED: dual specificity protein kinase TTK [Tribolium castaneum]	66.36	2e-41
c12070_g1_i1|m.10254	gi|642939606|ref|XP_008194757.1| PREDICTED: oxysterol-binding protein-related protein 8 [Tribolium castaneum]	78.72	0
c12073_g2_i3|m.10259	gi|642931144|ref|XP_008196460.1| PREDICTED: sialin [Tribolium castaneum]	55.89	0
c12074_g1_i3|m.10262	gi|642930142|ref|XP_008196269.1| PREDICTED: hepatocyte nuclear factor 4-gamma isoform X3 [Tribolium castaneum]	74.03	0
c12075_g1_i1|m.10266	gi|642911732|ref|XP_008200717.1| PREDICTED: uncharacterized protein LOC660279 [Tribolium castaneum]	57.79	0
c12076_g1_i1|m.10269	gi|91080861|ref|XP_971851.1| PREDICTED: NADH dehydrogenase [ubiquinone] 1 alpha subcomplex subunit 10, mitochondrial [Tribolium castaneum]	54.52	7e-158
c12077_g1_i1|m.10270	gi|642926073|ref|XP_008194754.1| PREDICTED: E3 ubiquitin-protein ligase RNF8-B-like [Tribolium castaneum]	38.98	7e-51
c12078_g1_i1|m.10273	gi|642919036|ref|XP_008191706.1| PREDICTED: uncharacterized protein LOC663686 isoform X2 [Tribolium castaneum]	60.43	0
c12079_g1_i2|m.10276	gi|642914506|ref|XP_008201705.1| PREDICTED: protein RUFY3 isoform X4 [Tribolium castaneum]	80.04	0
c12079_g1_i3|m.10277	gi|642914504|ref|XP_008201703.1| PREDICTED: RUN and FYVE domain-containing protein 2 isoform X3 [Tribolium castaneum]	77.69	0
c12080_g1_i1|m.10278	gi|642921683|ref|XP_008194664.1| PREDICTED: ER membrane protein complex subunit 4 [Tribolium castaneum]	68.79	6e-82
c12081_g1_i1|m.10279	gi|642914878|ref|XP_008190428.1| PREDICTED: unconventional myosin-Ia [Tribolium castaneum]	77.43	0
c12082_g1_i3|m.10285	gi|189237669|ref|XP_967427.2| PREDICTED: hypoxia-inducible factor 1-alpha [Tribolium castaneum]	67.36	0
c12083_g1_i1|m.10286	gi|91083579|ref|XP_968212.1| PREDICTED: lysine--tRNA ligase isoform X2 [Tribolium castaneum]	79.43	0
c12084_g1_i2|m.10288	gi|189234331|ref|XP_973286.2| PREDICTED: calexcitin-1 isoform X2 [Tribolium castaneum]	80.77	1e-111
c12085_g1_i1|m.10289	gi|642915787|ref|XP_008200077.1| PREDICTED: LOW QUALITY PROTEIN: uncharacterized protein LOC100141695 [Tribolium castaneum]	43.57	7e-147
c12086_g3_i1|m.10290	gi|189242024|ref|XP_967940.2| PREDICTED: sideroflexin-2 [Tribolium castaneum]	75.31	0
c12087_g1_i1|m.10291	gi|642929381|ref|XP_008195812.1| PREDICTED: E3 ubiquitin-protein ligase synoviolin A [Tribolium castaneum]	85.43	0
c12088_g1_i1|m.10292	gi|642910330|ref|XP_970349.3| PREDICTED: 2-oxoglutarate and iron-dependent oxygenase domain-containing protein 3-like [Tribolium castaneum]	59.42	2e-131
c12089_g1_i1|m.10293	gi|642916023|ref|XP_008190861.1| PREDICTED: craniofacial development protein 1 [Tribolium castaneum]	49.04	2e-69
c12090_g1_i1|m.10295	gi|642916782|ref|XP_008199500.1| PREDICTED: caspase-like protein isoform X1 [Tribolium castaneum]	46.5	3e-83
c12092_g1_i1|m.10298	gi|189237733|ref|XP_970794.2| PREDICTED: cGMP-dependent 3',5'-cyclic phosphodiesterase-like isoform X1 [Tribolium castaneum]	39.14	7e-177
c12093_g1_i1|m.10300	gi|642929348|ref|XP_008195797.1| PREDICTED: kinesin-like protein KIF16B [Tribolium castaneum]	70.63	0
c12095_g1_i1|m.10303	gi|91083171|ref|XP_972171.1| PREDICTED: mRNA-capping enzyme [Tribolium castaneum]	66.09	0
c12096_g1_i1|m.10305	gi|91086355|ref|XP_974424.1| PREDICTED: transcription factor TFIIIB component B'' homolog [Tribolium castaneum]	42.81	6e-122
c12097_g1_i2|m.10307	gi|91094499|ref|XP_971436.1| PREDICTED: phosphopantothenate--cysteine ligase [Tribolium castaneum]	80.97	0
c12099_g1_i1|m.10309	gi|91088847|ref|XP_970872.1| PREDICTED: adenosine kinase [Tribolium castaneum]	66.47	1e-172
c12100_g1_i1|m.10310	gi|642916870|ref|XP_008199535.1| PREDICTED: tRNA (guanine-N(7)-)-methyltransferase non-catalytic subunit wuho [Tribolium castaneum]	43.21	1e-85
c12101_g1_i1|m.10311	gi|642916818|ref|XP_008199514.1| PREDICTED: THO complex subunit 3 [Tribolium castaneum]	83.44	0
c12102_g2_i2|m.10315	gi|642926342|ref|XP_008194886.1| PREDICTED: small G protein signaling modulator 1 isoform X2 [Tribolium castaneum]	76.28	0
c12103_g1_i2|m.10319	gi|91092760|ref|XP_973551.1| PREDICTED: protein BCL9 homolog [Tribolium castaneum]	73.75	0
c12104_g1_i1|m.10322	gi|642911696|ref|XP_008200705.1| PREDICTED: adapter molecule Crk [Tribolium castaneum]	78.36	3e-156
c12105_g1_i1|m.10323	gi|642910200|ref|XP_008198377.1| PREDICTED: N-alpha-acetyltransferase 35, NatC auxiliary subunit [Tribolium castaneum]	73.68	0
c12108_g1_i1|m.10327	gi|642912652|ref|XP_008200949.1| PREDICTED: tubulin epsilon chain [Tribolium castaneum]	51.65	8e-162
c12109_g1_i1|m.10330	gi|642919030|ref|XP_008191704.1| PREDICTED: MAGUK p55 subfamily member 5-A isoform X2 [Tribolium castaneum]	76.59	0
c12110_g1_i3|m.10337	gi|642926660|ref|XP_008194959.1| PREDICTED: protein mothers against dpp-like isoform X1 [Tribolium castaneum]	88.7	0
c12112_g1_i2|m.10343	gi|642915536|ref|XP_008190656.1| PREDICTED: uncharacterized Golgi apparatus membrane protein-like protein CG5021 isoform X1 [Tribolium castaneum]	70.51	2e-112
c12112_g1_i3|m.10345	gi|91078504|ref|XP_969393.1| PREDICTED: uncharacterized Golgi apparatus membrane protein-like protein CG5021 isoform X2 [Tribolium castaneum]	70.89	9e-112
c12113_g1_i1|m.10347	gi|237681135|ref|NP_001153712.1| catalase-like [Tribolium castaneum]	74.7	0
c12114_g1_i1|m.10348	gi|189238013|ref|XP_001813375.1| PREDICTED: ATP-binding cassette sub-family B member 7, mitochondrial [Tribolium castaneum]	70.25	0
c12118_g1_i1|m.10356	gi|642934625|ref|XP_972040.2| PREDICTED: atrial natriuretic peptide-converting enzyme isoform X1 [Tribolium castaneum]	65.82	0
c1212_g1_i1|m.363	gi|642927799|ref|XP_008195409.1| PREDICTED: uncharacterized protein LOC103313581 [Tribolium castaneum]	42.86	8e-16
c12120_g2_i1|m.10358	gi|642911066|ref|XP_008200560.1| PREDICTED: nipped-B-like protein isoform X2 [Tribolium castaneum]	71.41	0
c12122_g1_i1|m.10362	gi|642917009|ref|XP_008199594.1| PREDICTED: tctex1 domain-containing protein 2 [Tribolium castaneum]	66.46	4e-71
c12123_g1_i1|m.10363	gi|642925606|ref|XP_008194638.1| PREDICTED: hippocampus abundant transcript 1 protein [Tribolium castaneum]	88.43	0
c12124_g1_i2|m.10369	gi|642911010|ref|XP_008193507.1| PREDICTED: spermatogenesis-defective protein 39 homolog [Tribolium castaneum]	32.98	5e-57
c12125_g1_i1|m.10370	gi|642922327|ref|XP_008193114.1| PREDICTED: uncharacterized protein LOC103312947 [Tribolium castaneum]	35.29	4e-23
c12126_g1_i2|m.10372	gi|91094647|ref|XP_971886.1| PREDICTED: protein transport protein Sec24C [Tribolium castaneum]	67.29	0
c12129_g2_i2|m.10380	gi|91084515|ref|XP_967225.1| PREDICTED: double-stranded RNA-specific editase Adar [Tribolium castaneum]	41.69	8e-70
c12130_g1_i1|m.10383	gi|642916047|ref|XP_008190871.1| PREDICTED: ras-GEF domain-containing family member 1B-like isoform X3 [Tribolium castaneum]	85.04	0
c12130_g1_i2|m.10386	gi|642916043|ref|XP_008190869.1| PREDICTED: ras-GEF domain-containing family member 1B-like isoform X1 [Tribolium castaneum]	81.13	0
c12131_g1_i2|m.10394	gi|642937338|ref|XP_008198794.1| PREDICTED: innexin inx7 [Tribolium castaneum]	63.16	3e-178
c12134_g1_i1|m.10400	gi|282165766|ref|NP_001164125.1| syntaxin 1A [Tribolium castaneum]	91.39	4e-168
c12134_g1_i5|m.10405	gi|642936199|ref|XP_008198343.1| PREDICTED: syntaxin 1A isoform X2 [Tribolium castaneum]	91.47	0
c12134_g1_i6|m.10406	gi|642936197|ref|XP_008198342.1| PREDICTED: syntaxin 1A isoform X1 [Tribolium castaneum]	93.95	0
c12135_g1_i1|m.10407	gi|91089811|ref|XP_968844.1| PREDICTED: ras-related protein Ral-a [Tribolium castaneum]	94.53	9e-134
c12136_g2_i1|m.10410	gi|642927549|ref|XP_971699.2| PREDICTED: single-strand selective monofunctional uracil DNA glycosylase [Tribolium castaneum]	54.65	9e-106
c12136_g2_i2|m.10413	gi|91085973|ref|XP_971753.1| PREDICTED: tRNA-specific adenosine deaminase 2 [Tribolium castaneum]	71.07	1e-82
c12137_g1_i1|m.10415	gi|91087363|ref|XP_975631.1| PREDICTED: iron-sulfur cluster assembly enzyme ISCU, mitochondrial [Tribolium castaneum]	86.18	1e-94
c12138_g1_i3|m.10419	gi|642928360|ref|XP_972133.2| PREDICTED: ATP-binding cassette sub-family B member 8, mitochondrial isoform X1 [Tribolium castaneum]	63.74	0
c12138_g1_i3|m.10420	gi|642928139|ref|XP_008200172.1| PREDICTED: general transcription factor IIH subunit 4 [Tribolium castaneum]	85.31	0
c12139_g1_i2|m.10421	gi|642910368|ref|XP_001810974.2| PREDICTED: kinesin-like protein KIF12 isoform X1 [Tribolium castaneum]	66.27	0
c12140_g1_i2|m.10423	gi|91079606|ref|XP_966371.1| PREDICTED: proton-coupled amino acid transporter 4 [Tribolium castaneum]	57.42	0
c12142_g1_i1|m.10424	gi|91085301|ref|XP_968534.1| PREDICTED: scavenger receptor class B member 1 isoform X1 [Tribolium castaneum]	59.66	0
c12143_g1_i1|m.10426	gi|91088919|ref|XP_973208.1| PREDICTED: protein asunder [Tribolium castaneum]	72.14	0
c12145_g1_i2|m.10429	gi|642915494|ref|XP_008190640.1| PREDICTED: glycerol kinase [Tribolium castaneum]	75.91	0
c12146_g1_i1|m.10431	gi|91094517|ref|XP_971992.1| PREDICTED: protein TEX261 isoform X2 [Tribolium castaneum]	60.71	6e-83
c12147_g1_i3|m.10436	gi|642920465|ref|XP_008192362.1| PREDICTED: CREB-binding protein isoform X3 [Tribolium castaneum]	72.67	0
c12148_g1_i1|m.10438	gi|91087875|ref|XP_969719.1| PREDICTED: 14-3-3 protein epsilon [Tribolium castaneum]	97.27	0
c12150_g1_i1|m.10442	gi|642916941|ref|XP_008199564.1| PREDICTED: mitochondrial import inner membrane translocase subunit Tim23 isoform X1 [Tribolium castaneum]	79.29	4e-105
c12150_g1_i2|m.10443	gi|91092934|ref|XP_971990.1| PREDICTED: mitochondrial import inner membrane translocase subunit Tim23 isoform X2 [Tribolium castaneum]	79	7e-106
c12151_g1_i1|m.10444	gi|642927065|ref|XP_970868.2| PREDICTED: uncharacterized protein LOC659471 [Tribolium castaneum]	45.48	1e-92
c12152_g1_i1|m.10445	gi|642916041|ref|XP_008190868.1| PREDICTED: ATP synthase subunit s-like protein [Tribolium castaneum]	57.6	3e-110
c12153_g1_i2|m.10447	gi|642915596|ref|XP_008190681.1| PREDICTED: LOW QUALITY PROTEIN: E3 ubiquitin-protein ligase CBL-B-B [Tribolium castaneum]	74.83	0
c12154_g1_i1|m.10448	gi|91088593|ref|XP_967390.1| PREDICTED: low density lipoprotein receptor adapter protein 1 [Tribolium castaneum]	53.41	3e-79
c12155_g1_i1|m.10449	gi|642931467|ref|XP_966826.3| PREDICTED: proton-coupled folate transporter [Tribolium castaneum]	62.2	0
c12156_g1_i2|m.10454	gi|642928913|ref|XP_971104.2| PREDICTED: FK506-binding protein 5 isoform X4 [Tribolium castaneum]	53.54	1e-169
c12156_g1_i3|m.10455	gi|642928915|ref|XP_008195614.1| PREDICTED: FK506-binding protein 5 isoform X5 [Tribolium castaneum]	49.66	2e-106
c12157_g1_i1|m.10456	gi|642938514|ref|XP_008195504.1| PREDICTED: hexaprenyldihydroxybenzoate methyltransferase, mitochondrial [Tribolium castaneum]	50	3e-96
c12158_g1_i2|m.10459	gi|642916992|ref|XP_008199586.1| PREDICTED: fibrinogen silencer-binding protein [Tribolium castaneum]	32.44	1e-29
c12159_g1_i1|m.10460	gi|91081217|ref|XP_975622.1| PREDICTED: ecdysteroid-regulated 16 kDa protein [Tribolium castaneum]	46.9	3e-40
c12160_g1_i1|m.10461	gi|91093413|ref|XP_967701.1| PREDICTED: FAS-associated factor 2 [Tribolium castaneum]	70.31	0
c12161_g1_i1|m.10462	gi|91086147|ref|XP_969343.1| PREDICTED: integrator complex subunit 11 [Tribolium castaneum]	88.74	0
c12162_g1_i1|m.10464	gi|91092096|ref|XP_971769.1| PREDICTED: ribosomal RNA-processing protein 7 homolog A [Tribolium castaneum]	45.56	6e-59
c12164_g1_i1|m.10467	gi|642922386|ref|XP_008193136.1| PREDICTED: adenylate kinase isoenzyme 1-like isoform X1 [Tribolium castaneum]	70.05	2e-98
c12167_g1_i1|m.10471	gi|642935133|ref|XP_008197900.1| PREDICTED: CTL-like protein 1 [Tribolium castaneum]	64.55	0
c12169_g1_i1|m.10473	gi|642927379|ref|XP_008195245.1| PREDICTED: putative gustatory receptor 28a [Tribolium castaneum]	27.15	3e-30
c12171_g1_i1|m.10474	gi|642914511|ref|XP_008201707.1| PREDICTED: protein scalloped isoform X2 [Tribolium castaneum]	91.04	0
c12171_g1_i2|m.10475	gi|642914509|ref|XP_008201706.1| PREDICTED: transcriptional enhancer factor TEF-1 isoform X1 [Tribolium castaneum]	90.56	0
c12172_g1_i1|m.10476	gi|642927010|ref|XP_008195102.1| PREDICTED: calcium-independent phospholipase A2-gamma-like [Tribolium castaneum]	50.35	0
c12173_g1_i1|m.10477	gi|642931340|ref|XP_008196537.1| PREDICTED: polypeptide N-acetylgalactosaminyltransferase 5 isoform X2 [Tribolium castaneum]	82.25	0
c12175_g1_i2|m.10482	gi|642933616|ref|XP_008197496.1| PREDICTED: deleted in autism protein 1 homolog [Tribolium castaneum]	42.15	6e-89
c12175_g1_i2|m.10483	gi|91082143|ref|XP_969545.1| PREDICTED: serine/Arginine-related protein 53 [Tribolium castaneum]	65.17	4e-38
c12176_g1_i2|m.10485	gi|91079212|ref|XP_966680.1| PREDICTED: myosin regulatory light chain sqh [Tribolium castaneum]	94.83	2e-122
c12178_g1_i1|m.10488	gi|282165747|ref|NP_001164115.1| caspase Nc-like [Tribolium castaneum]	33.49	2e-61
c12179_g1_i3|m.10493	gi|642937845|ref|XP_008200324.1| PREDICTED: heterogeneous nuclear ribonucleoprotein H [Tribolium castaneum]	67.16	3e-174
c12180_g1_i1|m.10497	gi|91078514|ref|XP_969613.1| PREDICTED: mediator of RNA polymerase II transcription subunit 24 [Tribolium castaneum]	66.96	0
c12181_g1_i1|m.10498	gi|642934492|ref|XP_008197687.1| PREDICTED: uncharacterized protein LOC100142416 [Tribolium castaneum]	55.79	0
c12183_g1_i1|m.10499	gi|91079056|ref|XP_975139.1| PREDICTED: uncharacterized protein LOC664025 [Tribolium castaneum]	62.94	1e-151
c12184_g1_i1|m.10500	gi|642931879|ref|XP_972641.2| PREDICTED: casein kinase I isoform delta-A isoform X2 [Tribolium castaneum]	90.44	0
c12185_g1_i1|m.10501	gi|642928819|ref|XP_008195574.1| PREDICTED: transcriptional repressor p66-alpha isoform X1 [Tribolium castaneum]	81.36	0
c12186_g1_i3|m.10505	gi|642913973|ref|XP_008201497.1| PREDICTED: dicer-2 isoform X1 [Tribolium castaneum]	48.63	0
c12187_g1_i1|m.10506	gi|91084287|ref|XP_966951.1| PREDICTED: rhythmically expressed gene 5 protein [Tribolium castaneum]	46.61	1e-61
c12189_g1_i2|m.10511	gi|91085843|ref|XP_974961.1| PREDICTED: protein lunapark [Tribolium castaneum]	49.62	7e-97
c12190_g1_i2|m.10513	gi|642931175|ref|XP_008196470.1| PREDICTED: uncharacterized protein LOC100141985 [Tribolium castaneum]	33.8	4e-61
c12192_g1_i1|m.10515	gi|255958232|ref|NP_001157646.1| matrix metalloproteinase 1 isoform 1 precursor [Tribolium castaneum]	69.39	0
c12192_g1_i2|m.10516	gi|642923069|ref|XP_008193598.1| PREDICTED: matrix metalloproteinase 1 isoform X2 [Tribolium castaneum]	68.8	0
c12193_g1_i1|m.10517	gi|91082197|ref|XP_971737.1| PREDICTED: alpha-aspartyl dipeptidase isoform X4 [Tribolium castaneum]	63.83	2e-107
c12194_g1_i1|m.10518	gi|642923711|ref|XP_974199.2| PREDICTED: protein smg8 [Tribolium castaneum]	68.08	0
c12196_g2_i2|m.10522	gi|642933333|ref|XP_008197371.1| PREDICTED: serine/arginine-rich splicing factor 2 isoform X2 [Tribolium castaneum]	96.97	1e-66
c12197_g1_i1|m.10524	gi|91091954|ref|XP_968265.1| PREDICTED: eukaryotic translation initiation factor 3 subunit M [Tribolium castaneum]	82.25	0
c12198_g1_i1|m.10525	gi|642927551|ref|XP_008195312.1| PREDICTED: protein HEXIM [Tribolium castaneum]	51.89	6e-73
c12199_g1_i1|m.10526	gi|642916772|ref|XP_008192547.1| PREDICTED: peptidoglycan-recognition protein LE-like [Tribolium castaneum]	52.85	3e-129
c1220_g2_i1|m.365	gi|189241815|ref|XP_971376.2| PREDICTED: FERM and PDZ domain-containing protein 4 isoform X1 [Tribolium castaneum]	49.02	2e-45
c12200_g1_i1|m.10527	gi|642930193|ref|XP_008196295.1| PREDICTED: senecionine N-oxygenase [Tribolium castaneum]	47.21	6e-122
c12201_g1_i1|m.10529	gi|642937185|ref|XP_008198729.1| PREDICTED: ras opposite isoform X1 [Tribolium castaneum]	90.19	0
c12202_g1_i2|m.10531	gi|91092728|ref|XP_972902.1| PREDICTED: GTP-binding protein 2 [Tribolium castaneum]	76.48	0
c12203_g1_i1|m.10532	gi|91094373|ref|XP_970761.1| PREDICTED: COP9 signalosome complex subunit 3 [Tribolium castaneum]	77.67	0
c12204_g1_i1|m.10533	gi|91088647|ref|XP_974447.1| PREDICTED: SUMO-activating enzyme subunit 1 [Tribolium castaneum]	53.22	2e-121
c12206_g1_i1|m.10536	gi|642915030|ref|XP_008190382.1| PREDICTED: aminopeptidase N-like [Tribolium castaneum]	43.73	0
c12207_g1_i1|m.10537	gi|91090326|ref|XP_966482.1| PREDICTED: general transcription factor IIF subunit 1 [Tribolium castaneum]	83.1	2e-68
c12209_g1_i3|m.10543	gi|642920087|ref|XP_008192199.1| PREDICTED: glycogen synthase kinase-3 beta isoform X4 [Tribolium castaneum]	88.89	0
c12211_g1_i1|m.10551	gi|642931249|ref|XP_008196500.1| PREDICTED: cytochrome b5-related protein-like [Tribolium castaneum]	53.36	2e-162
c12212_g2_i1|m.10552	gi|642928142|ref|XP_008200173.1| PREDICTED: putative phosphatidate phosphatase isoform X2 [Tribolium castaneum]	56.04	7e-105
c12212_g2_i2|m.10553	gi|189239065|ref|XP_971190.2| PREDICTED: putative phosphatidate phosphatase isoform X1 [Tribolium castaneum]	54.04	2e-108
c12213_g1_i1|m.10554	gi|91078460|ref|XP_967570.1| PREDICTED: tether containing UBX domain for GLUT4-like [Tribolium castaneum]	61.83	6e-76
c12214_g1_i1|m.10557	gi|642925859|ref|XP_008190584.1| PREDICTED: cytochrome c oxidase assembly factor 7 homolog [Tribolium castaneum]	62.96	1e-105
c12215_g1_i1|m.10558	gi|642938826|ref|XP_008199935.1| PREDICTED: acyl-CoA Delta(11) desaturase isoform X1 [Tribolium castaneum]	50.91	6e-118
c12216_g1_i2|m.10561	gi|189238518|ref|XP_001811514.1| PREDICTED: dnaJ homolog subfamily C member 30 [Tribolium castaneum]	45.88	9e-46
c12217_g1_i4|m.10567	gi|91081981|ref|XP_968444.1| PREDICTED: organic cation transporter protein [Tribolium castaneum]	65.35	0
c12220_g1_i1|m.10571	gi|642916989|ref|XP_008199585.1| PREDICTED: LOW QUALITY PROTEIN: B-cell receptor-associated protein 31 [Tribolium castaneum]	65.84	1e-101
c12221_g1_i1|m.10572	gi|91077078|ref|XP_969608.1| PREDICTED: integrator complex subunit 7 [Tribolium castaneum]	70.95	0
c12222_g1_i3|m.10575	gi|642919263|ref|XP_008191800.1| PREDICTED: bestrophin-2 [Tribolium castaneum]	62.62	0
c12223_g1_i1|m.10576	gi|642933365|ref|XP_008197385.1| PREDICTED: uncharacterized protein LOC659874 isoform X2 [Tribolium castaneum]	76.82	0
c12226_g1_i1|m.10581	gi|642926497|ref|XP_008191980.1| PREDICTED: iron-sulfur cluster co-chaperone protein HscB, mitochondrial [Tribolium castaneum]	53.69	6e-73
c12227_g1_i1|m.10582	gi|642939274|ref|XP_008192907.1| PREDICTED: polycomb group protein Psc-like isoform X3 [Tribolium castaneum]	76.13	1e-126
c12228_g1_i1|m.10583	gi|642937864|ref|XP_008200330.1| PREDICTED: protein FAM91A1 [Tribolium castaneum]	68.4	0
c12229_g1_i1|m.10584	gi|91085531|ref|XP_972280.1| PREDICTED: beta-ureidopropionase [Tribolium castaneum]	66.4	0
c12230_g1_i1|m.10585	gi|642926887|ref|XP_008195053.1| PREDICTED: zinc finger HIT domain-containing protein 2 [Tribolium castaneum]	43.4	1e-88
c12232_g1_i1|m.10589	gi|642937533|ref|XP_008199086.1| PREDICTED: F-box only protein 9 [Tribolium castaneum]	55.32	6e-160
c12233_g1_i1|m.10590	gi|91083737|ref|XP_970914.1| PREDICTED: uncharacterized protein LOC659522 [Tribolium castaneum]	68.12	0
c12235_g1_i1|m.10595	gi|642939069|ref|XP_008200209.1| PREDICTED: HIV Tat-specific factor 1 homolog isoform X2 [Tribolium castaneum]	61.96	2e-169
c12237_g1_i1|m.10600	gi|642936928|ref|XP_008194494.1| PREDICTED: myb-like protein X [Tribolium castaneum]	32.73	6e-108
c12241_g1_i1|m.10607	gi|91093659|ref|XP_966349.1| PREDICTED: glutamate--cysteine ligase catalytic subunit [Tribolium castaneum]	75.87	0
c12242_g1_i2|m.10609	gi|642933622|ref|XP_008197499.1| PREDICTED: ubiquitin carboxyl-terminal hydrolase 7 isoform X2 [Tribolium castaneum]	83.18	0
c12243_g1_i1|m.10610	gi|91082983|ref|XP_974176.1| PREDICTED: tetratricopeptide repeat protein 19 homolog, mitochondrial [Tribolium castaneum]	59.94	6e-116
c12244_g1_i1|m.10611	gi|91087911|ref|XP_970926.1| PREDICTED: protein windbeutel [Tribolium castaneum]	53.39	1e-89
c12246_g1_i3|m.10614	gi|642915999|ref|XP_008190850.1| PREDICTED: kinectin-like [Tribolium castaneum]	29.77	2e-39
c12247_g1_i1|m.10615	gi|642929832|ref|XP_008195993.1| PREDICTED: N-acylneuraminate-9-phosphatase [Tribolium castaneum]	60.63	4e-112
c12248_g1_i1|m.10617	gi|642937544|ref|XP_008199089.1| PREDICTED: major facilitator superfamily domain-containing protein 9-like isoform X2 [Tribolium castaneum]	46.21	8e-125
c12250_g1_i1|m.10618	gi|91084269|ref|XP_971097.1| PREDICTED: FAM203 family protein CG6073 [Tribolium castaneum]	48.5	3e-110
c12252_g1_i1|m.10621	gi|91086847|ref|XP_974260.1| PREDICTED: BSD domain-containing protein 1-B [Tribolium castaneum]	53.64	1e-117
c12253_g1_i1|m.10622	gi|91090027|ref|XP_967605.1| PREDICTED: uroporphyrinogen-III synthase [Tribolium castaneum]	42	3e-63
c12254_g1_i2|m.10623	gi|642912405|ref|XP_008199494.1| PREDICTED: liprin-alpha-1 isoform X12 [Tribolium castaneum]	90.75	0
c12254_g1_i3|m.10624	gi|642912387|ref|XP_008199485.1| PREDICTED: liprin-alpha-1 isoform X3 [Tribolium castaneum]	90.65	0
c12254_g1_i4|m.10625	gi|642912389|ref|XP_008199486.1| PREDICTED: liprin-alpha-1 isoform X4 [Tribolium castaneum]	90.39	0
c12256_g1_i1|m.10628	gi|642926608|ref|XP_969412.2| PREDICTED: histone-lysine N-methyltransferase pr-set7 [Tribolium castaneum]	52.44	1e-100
c12257_g1_i1|m.10629	gi|189233602|ref|XP_001810921.1| PREDICTED: F-box only protein 28 [Tribolium castaneum]	48.64	4e-126
c12258_g1_i1|m.10630	gi|642919850|ref|XP_008192095.1| PREDICTED: protein tumorous imaginal discs, mitochondrial isoform X1 [Tribolium castaneum]	62.13	0
c12258_g1_i1|m.10631	gi|642919848|ref|XP_008192094.1| PREDICTED: uncharacterized protein LOC103312662 [Tribolium castaneum]	58.24	8e-140
c12258_g1_i2|m.10632	gi|189236448|ref|XP_973457.2| PREDICTED: protein tumorous imaginal discs, mitochondrial isoform X2 [Tribolium castaneum]	65.23	0
c1226_g2_i1|m.368	gi|642925144|ref|XP_008194444.1| PREDICTED: WSCD family member AGAP003962 [Tribolium castaneum]	64.2	1e-71
c12260_g1_i1|m.10633	gi|91085783|ref|XP_974443.1| PREDICTED: fumarylacetoacetase [Tribolium castaneum]	75.48	0
c12261_g1_i1|m.10634	gi|642930197|ref|XP_008196297.1| PREDICTED: protein jagged-1b isoform X2 [Tribolium castaneum]	82.86	0
c12264_g1_i2|m.10648	gi|642915240|ref|XP_008190537.1| PREDICTED: uncharacterized protein LOC103312213 [Tribolium castaneum]	45.56	1e-112
c12265_g1_i1|m.10649	gi|642917874|ref|XP_969397.3| PREDICTED: ras-specific guanine nucleotide-releasing factor RalGPS1-like isoform X1 [Tribolium castaneum]	69.16	0
c12267_g1_i3|m.10654	gi|91086669|ref|XP_968223.1| PREDICTED: proteasomal ubiquitin receptor ADRM1 [Tribolium castaneum]	69.66	7e-173
c12268_g1_i1|m.10655	gi|189235517|ref|XP_970938.2| PREDICTED: arf-GAP with dual PH domain-containing protein 1-like [Tribolium castaneum]	83.29	0
c12269_g1_i1|m.10657	gi|642937213|ref|XP_008198742.1| PREDICTED: activin receptor type-2A [Tribolium castaneum]	67.74	0
c12271_g1_i2|m.10662	gi|189239293|ref|XP_001812278.1| PREDICTED: uncharacterized protein LOC100142182 [Tribolium castaneum]	35.75	6e-60
c12274_g1_i1|m.10673	gi|642917633|ref|XP_008193409.1| PREDICTED: DNA topoisomerase 2 [Tribolium castaneum]	70.32	0
c12276_g1_i1|m.10679	gi|642923916|ref|XP_008193926.1| PREDICTED: uncharacterized protein LOC657651 isoform X2 [Tribolium castaneum]	53.07	1e-159
c12277_g1_i2|m.10680	gi|91094779|ref|XP_968180.1| PREDICTED: palmitoyltransferase ZDHHC15 isoform X2 [Tribolium castaneum]	66.56	7e-161
c12277_g1_i4|m.10682	gi|642939516|ref|XP_008190942.1| PREDICTED: palmitoyltransferase ZDHHC15 isoform X1 [Tribolium castaneum]	65.94	5e-163
c12279_g2_i1|m.10684	gi|642929825|ref|XP_008195991.1| PREDICTED: adipocyte plasma membrane-associated protein-like [Tribolium castaneum]	64.34	0
c12280_g1_i1|m.10686	gi|189240401|ref|XP_968302.2| PREDICTED: zinc finger protein 2 homolog [Tribolium castaneum]	43.51	3e-179
c12282_g1_i2|m.10690	gi|642922658|ref|XP_008193265.1| PREDICTED: PDF receptor [Tribolium castaneum]	60.51	3e-154
c12283_g1_i1|m.10691	gi|91081135|ref|XP_975546.1| PREDICTED: malate dehydrogenase, cytoplasmic [Tribolium castaneum]	74.17	4e-167
c12284_g1_i1|m.10692	gi|91093979|ref|XP_969006.1| PREDICTED: tryptophan--tRNA ligase, cytoplasmic [Tribolium castaneum]	74.75	0
c12285_g1_i1|m.10693	gi|189241454|ref|XP_973382.2| PREDICTED: brahma-associated protein of 60 kDa isoform X2 [Tribolium castaneum]	91.54	0
c12286_g1_i1|m.10694	gi|91090284|ref|XP_971237.1| PREDICTED: KH domain-containing protein C56G2.1 [Tribolium castaneum]	47.1	0
c12287_g1_i1|m.10696	gi|91083889|ref|XP_974460.1| PREDICTED: UPF0553 protein C9orf64 homolog [Tribolium castaneum]	59.09	2e-150
c12288_g1_i2|m.10698	gi|642915043|ref|XP_008190386.1| PREDICTED: gamma-interferon-inducible lysosomal thiol reductase-like isoform X1 [Tribolium castaneum]	46.7	6e-61
c12289_g1_i2|m.10700	gi|91093477|ref|XP_968017.1| PREDICTED: U5 small nuclear ribonucleoprotein 40 kDa protein [Tribolium castaneum]	78.45	0
c12290_g1_i1|m.10701	gi|642919065|ref|XP_008191718.1| PREDICTED: dolichyl-phosphate beta-glucosyltransferase [Tribolium castaneum]	63.44	1e-153
c12291_g1_i1|m.10702	gi|91076528|ref|XP_973650.1| PREDICTED: U3 small nucleolar RNA-associated protein 15 homolog [Tribolium castaneum]	65.33	0
c12292_g1_i1|m.10703	gi|189241162|ref|XP_974687.2| PREDICTED: 26S proteasome non-ATPase regulatory subunit 11 [Tribolium castaneum]	92.33	0
c12293_g1_i1|m.10704	gi|642918047|ref|XP_008198994.1| PREDICTED: choline transporter-like protein 1 [Tribolium castaneum]	37.97	4e-126
c12294_g1_i1|m.10705	gi|91085319|ref|XP_969635.1| PREDICTED: bromodomain-containing protein 7 isoform X2 [Tribolium castaneum]	62.2	0
c12295_g2_i2|m.10708	gi|642910236|ref|XP_968029.3| PREDICTED: protein app1-like isoform X1 [Tribolium castaneum]	54.12	0
c12295_g2_i3|m.10711	gi|642910240|ref|XP_008198519.1| PREDICTED: glycogenin-2-like isoform X3 [Tribolium castaneum]	65.55	0
c12296_g1_i1|m.10712	gi|91085535|ref|XP_972381.1| PREDICTED: mitochondrial fission process protein 1 isoform X1 [Tribolium castaneum]	52.67	3e-47
c12297_g1_i5|m.10718	gi|642939976|ref|XP_968254.2| PREDICTED: myb-like protein X [Tribolium castaneum]	41.24	4e-16
c12297_g1_i5|m.10719	gi|189235739|ref|XP_966540.2| PREDICTED: UDP-GlcNAc:betaGal beta-1,3-N-acetylglucosaminyltransferase-like protein 1 [Tribolium castaneum]	59.71	2e-154
c12298_g1_i1|m.10721	gi|91091122|ref|XP_969428.1| PREDICTED: CD63 antigen [Tribolium castaneum]	52.05	7e-103
c12299_g1_i1|m.10723	gi|642930975|ref|XP_008196162.1| PREDICTED: 116 kDa U5 small nuclear ribonucleoprotein component [Tribolium castaneum]	96.65	0
c123_g1_i1|m.43	gi|642940444|ref|XP_008196992.1| PREDICTED: LOW QUALITY PROTEIN: pescadillo homolog, partial [Tribolium castaneum]	68.8	7e-175
c12300_g1_i1|m.10725	gi|189236814|ref|XP_001811847.1| PREDICTED: ATP-binding cassette sub-family G member 4-like [Tribolium castaneum]	47.12	0
c12301_g1_i2|m.10727	gi|642922634|ref|XP_008193257.1| PREDICTED: uncharacterized protein LOC659719 isoform X2 [Tribolium castaneum]	45.87	0
c12303_g2_i4|m.10735	gi|642924514|ref|XP_008194327.1| PREDICTED: nuclear fragile X mental retardation-interacting protein 1 [Tribolium castaneum]	41.28	3e-106
c12304_g1_i1|m.10736	gi|91082057|ref|XP_971798.1| PREDICTED: mitochondrial chaperone BCS1 [Tribolium castaneum]	81.8	0
c12305_g2_i1|m.10737	gi|642917050|ref|XP_008191099.1| PREDICTED: ras-related GTP-binding protein C isoform X1 [Tribolium castaneum]	88.71	0
c12307_g1_i1|m.10742	gi|642914292|ref|XP_008201625.1| PREDICTED: dual specificity mitogen-activated protein kinase kinase 7 [Tribolium castaneum]	61.25	0
c12308_g1_i1|m.10745	gi|642925302|ref|XP_008194498.1| PREDICTED: phosphate carrier protein, mitochondrial-like isoform X2 [Tribolium castaneum]	77.59	0
c12309_g1_i1|m.10746	gi|642917250|ref|XP_967285.3| PREDICTED: SPARC-related modular calcium-binding protein 2 isoform X2 [Tribolium castaneum]	54.44	0
c1231_g2_i1|m.371	gi|642920604|ref|XP_008192484.1| PREDICTED: uncharacterized protein LOC100142143 [Tribolium castaneum]	36.07	2e-23
c12310_g1_i2|m.10750	gi|237681149|ref|NP_001153721.1| ATP-dependent RNA helicase belle [Tribolium castaneum]	76.87	0
c12311_g1_i1|m.10754	gi|642934168|ref|XP_008199635.1| PREDICTED: ubiquitin-like modifier-activating enzyme ATG7 [Tribolium castaneum]	52.8	0
c12313_g1_i1|m.10757	gi|91093773|ref|XP_966763.1| PREDICTED: KAT8 regulatory NSL complex subunit 1 [Tribolium castaneum]	55.78	0
c12314_g1_i1|m.10759	gi|91090866|ref|XP_972858.1| PREDICTED: serine/threonine-protein kinase VRK1 [Tribolium castaneum]	53.37	6e-123
c12318_g1_i1|m.10764	gi|642930308|ref|XP_008196340.1| PREDICTED: bromodomain-containing protein 8 [Tribolium castaneum]	53.23	0
c12319_g1_i1|m.10765	gi|642926262|ref|XP_001813701.2| PREDICTED: E3 ubiquitin-protein ligase FANCL-like [Tribolium castaneum]	37.01	3e-80
c12320_g2_i1|m.10768	gi|642937675|ref|XP_008198897.1| PREDICTED: LOW QUALITY PROTEIN: uncharacterized protein LOC655743 [Tribolium castaneum]	46.06	0
c12321_g1_i1|m.10772	gi|91078278|ref|XP_971673.1| PREDICTED: probable malonyl-CoA-acyl carrier protein transacylase, mitochondrial [Tribolium castaneum]	72.21	0
c12322_g1_i1|m.10773	gi|642913536|ref|XP_008201054.1| PREDICTED: uncharacterized protein C1orf131 [Tribolium castaneum]	52.67	2e-38
c12323_g1_i2|m.10775	gi|91080221|ref|XP_972212.1| PREDICTED: tRNA 2'-phosphotransferase 1 [Tribolium castaneum]	48.95	4e-52
c12325_g1_i1|m.10780	gi|642914968|ref|XP_008190463.1| PREDICTED: kelch-like protein 5 [Tribolium castaneum]	79.77	0
c12325_g1_i3|m.10782	gi|642914535|ref|XP_008201718.1| PREDICTED: Hermansky-Pudlak syndrome 1 protein homolog isoform X1 [Tribolium castaneum]	60.03	0
c12326_g1_i2|m.10787	gi|91077588|ref|XP_973180.1| PREDICTED: probable cytochrome P450 304a1 [Tribolium castaneum]	49.31	0
c12327_g1_i1|m.10788	gi|91091852|ref|XP_968503.1| PREDICTED: innexin inx1 [Tribolium castaneum]	75.49	0
c12328_g1_i3|m.10791	gi|642921741|ref|XP_008199308.1| PREDICTED: protein kinase C-binding protein 1 isoform X1 [Tribolium castaneum]	54.14	2e-159
c12330_g1_i1|m.10796	gi|642912083|ref|XP_008200795.1| PREDICTED: phospholipase A2 inhibitor-like [Tribolium castaneum]	32.55	2e-51
c12331_g1_i1|m.10798	gi|642938005|ref|XP_008199168.1| PREDICTED: phosphatidylinositol 4,5-bisphosphate 5-phosphatase A-like isoform X2 [Tribolium castaneum]	63.78	0
c12331_g1_i2|m.10799	gi|189241858|ref|XP_971116.2| PREDICTED: phosphatidylinositol 4,5-bisphosphate 5-phosphatase A-like isoform X1 [Tribolium castaneum]	62.86	0
c12332_g1_i3|m.10802	gi|642939893|ref|XP_008200223.1| PREDICTED: tyrosine-protein phosphatase non-receptor type 11 isoform X1 [Tribolium castaneum]	81.57	0
c12334_g1_i2|m.10806	gi|642926990|ref|XP_008195093.1| PREDICTED: uncharacterized protein LOC656611 [Tribolium castaneum]	53.61	0
c12335_g1_i1|m.10809	gi|642913192|ref|XP_008201430.1| PREDICTED: E3 ubiquitin-protein ligase SHPRH isoform X1 [Tribolium castaneum]	48.48	0
c12336_g1_i1|m.10810	gi|91077034|ref|XP_967567.1| PREDICTED: cysteine and histidine-rich domain-containing protein [Tribolium castaneum]	61.49	1e-156
c12337_g1_i1|m.10811	gi|642927427|ref|XP_008195268.1| PREDICTED: uncharacterized protein LOC103313545 isoform X2 [Tribolium castaneum]	60.55	4e-121
c12338_g1_i1|m.10812	gi|642917117|ref|XP_008191121.1| PREDICTED: rho GTPase-activating protein 1 [Tribolium castaneum]	71.91	0
c12339_g1_i1|m.10814	gi|91087589|ref|XP_971974.1| PREDICTED: RNA polymerase II subunit A C-terminal domain phosphatase [Tribolium castaneum]	75.86	3e-180
c12339_g1_i1|m.10815	gi|642930281|ref|XP_008196327.1| PREDICTED: 28S ribosomal protein S17, mitochondrial [Tribolium castaneum]	71.25	1e-80
c12340_g1_i1|m.10816	gi|642929350|ref|XP_008195799.1| PREDICTED: translation initiation factor IF-2, mitochondrial [Tribolium castaneum]	65.24	0
c12342_g1_i1|m.10818	gi|91093539|ref|XP_966844.1| PREDICTED: short coiled-coil protein homolog [Tribolium castaneum]	91.43	1e-87
c12343_g1_i1|m.10820	gi|642929834|ref|XP_008195994.1| PREDICTED: thyroid receptor-interacting protein 11-like [Tribolium castaneum]	58.5	7e-159
c12343_g1_i2|m.10824	gi|91087349|ref|XP_975612.1| PREDICTED: ras-related protein Rab-23 [Tribolium castaneum]	90.13	1e-133
c12345_g2_i2|m.10828	gi|642910295|ref|XP_008200272.1| PREDICTED: beta-N-acetylglucosaminidase NAG2 isoform X1 [Tribolium castaneum]	55.65	0
c12346_g1_i1|m.10829	gi|91078446|ref|XP_966974.1| PREDICTED: drebrin-like protein [Tribolium castaneum]	69.2	0
c12347_g1_i1|m.10830	gi|91085591|ref|XP_968761.1| PREDICTED: probable RNA-binding protein CG14230 [Tribolium castaneum]	42.63	2e-60
c12348_g1_i6|m.10836	gi|642937125|ref|XP_008198703.1| PREDICTED: N-acetyllactosaminide beta-1,3-N-acetylglucosaminyltransferase [Tribolium castaneum]	68.63	0
c1235_g1_i1|m.373	gi|91086115|ref|XP_968072.1| PREDICTED: sister chromatid cohesion protein DCC1 [Tribolium castaneum]	58.77	4e-153
c12350_g1_i1|m.10839	gi|91090604|ref|XP_973047.1| PREDICTED: AP-2 complex subunit mu [Tribolium castaneum]	99.09	0
c12351_g1_i2|m.10843	gi|642912701|ref|XP_970424.2| PREDICTED: histone-lysine N-methyltransferase SMYD3 [Tribolium castaneum]	55.17	4e-180
c12352_g1_i1|m.10844	gi|642939900|ref|XP_008200249.1| PREDICTED: proton-coupled amino acid transporter 2 [Tribolium castaneum]	34.62	1e-26
c12355_g1_i1|m.10852	gi|91092544|ref|XP_968085.1| PREDICTED: pre-mRNA-splicing factor SYF1 [Tribolium castaneum]	85.68	0
c12356_g1_i1|m.10853	gi|642915919|ref|XP_008190810.1| PREDICTED: protein retinal degeneration B isoform X2 [Tribolium castaneum]	79.32	0
c12356_g1_i4|m.10859	gi|642915923|ref|XP_008190812.1| PREDICTED: protein retinal degeneration B isoform X4 [Tribolium castaneum]	79.22	0
c12357_g1_i1|m.10861	gi|91086797|ref|XP_973406.1| PREDICTED: CTD small phosphatase-like protein 2 [Tribolium castaneum]	60.16	0
c12358_g1_i1|m.10862	gi|189237643|ref|XP_966949.2| PREDICTED: diphthine synthase [Tribolium castaneum]	72.59	8e-147
c12360_g1_i1|m.10863	gi|189235975|ref|XP_970508.2| PREDICTED: TBC1 domain family member 13 [Tribolium castaneum]	82.43	0
c12361_g2_i3|m.10866	gi|642911754|ref|XP_008200727.1| PREDICTED: protein grainyhead isoform X2 [Tribolium castaneum]	83.65	0
c12361_g2_i4|m.10868	gi|642911752|ref|XP_008200726.1| PREDICTED: protein grainyhead isoform X1 [Tribolium castaneum]	84.66	0
c12363_g1_i1|m.10877	gi|91090594|ref|XP_972814.1| PREDICTED: ATP-binding cassette sub-family F member 3 [Tribolium castaneum]	80.57	0
c12364_g1_i1|m.10879	gi|642930165|ref|XP_008196280.1| PREDICTED: high affinity cAMP-specific and IBMX-insensitive 3',5'-cyclic phosphodiesterase 8A isoform X2 [Tribolium castaneum]	65.51	0
c12365_g1_i2|m.10883	gi|642912146|ref|XP_008200825.1| PREDICTED: uncharacterized protein LOC656488 [Tribolium castaneum]	58.45	0
c12366_g1_i2|m.10885	gi|91094481|ref|XP_970829.1| PREDICTED: WD and tetratricopeptide repeats protein 1 [Tribolium castaneum]	56.25	0
c12367_g1_i1|m.10886	gi|189238431|ref|XP_001814401.1| PREDICTED: uncharacterized protein LOC100142238 [Tribolium castaneum]	25.16	2e-15
c12369_g1_i1|m.10890	gi|642912502|ref|XP_008200893.1| PREDICTED: major facilitator superfamily domain-containing protein 6 [Tribolium castaneum]	58.01	0
c12371_g1_i1|m.10894	gi|91085035|ref|XP_974101.1| PREDICTED: prohibitin-2 isoform X1 [Tribolium castaneum]	87.96	0
c12373_g1_i2|m.10901	gi|642912307|ref|XP_008200643.1| PREDICTED: glycerol-3-phosphate acyltransferase 3 isoform X1 [Tribolium castaneum]	69.74	0
c12374_g1_i1|m.10903	gi|91095331|ref|XP_975275.1| PREDICTED: von Willebrand factor A domain-containing protein 8 [Tribolium castaneum]	64.71	0
c12376_g1_i2|m.10907	gi|642920424|ref|XP_008192344.1| PREDICTED: fasciclin-2 isoform X3 [Tribolium castaneum]	54.81	0
c12377_g1_i3|m.10911	gi|642938917|ref|XP_001808877.2| PREDICTED: suppressor protein SRP40-like isoform X1 [Tribolium castaneum]	54.23	0
c12378_g1_i1|m.10914	gi|91092696|ref|XP_971938.1| PREDICTED: trafficking protein particle complex subunit 8 [Tribolium castaneum]	48.12	0
c12379_g1_i1|m.10915	gi|642936624|ref|XP_008198511.1| PREDICTED: uncharacterized protein LOC661743 isoform X3 [Tribolium castaneum]	60.79	0
c12379_g1_i2|m.10917	gi|189241444|ref|XP_972982.2| PREDICTED: uncharacterized protein LOC661743 isoform X1 [Tribolium castaneum]	61.41	0
c1238_g1_i1|m.375	gi|642927327|ref|XP_008195222.1| PREDICTED: protein canopy homolog 1 [Tribolium castaneum]	51.15	1e-60
c12380_g1_i1|m.10919	gi|91080375|ref|XP_975028.1| PREDICTED: single-stranded DNA-binding protein, mitochondrial [Tribolium castaneum]	73.68	1e-73
c12382_g1_i1|m.10923	gi|91085235|ref|XP_972927.1| PREDICTED: nuclear speckle splicing regulatory protein 1 [Tribolium castaneum]	58.75	9e-86
c12383_g1_i1|m.10925	gi|194354009|ref|NP_001123894.1| cytochrome P450 CYP314A1 [Tribolium castaneum]	52.34	0
c12384_g1_i2|m.10927	gi|642930601|ref|XP_008198311.1| PREDICTED: uncharacterized protein LOC103314328 [Tribolium castaneum]	37.62	3e-69
c12385_g1_i1|m.10929	gi|642940031|ref|XP_008201482.1| PREDICTED: calcium/calmodulin-dependent protein kinase kinase 2-like, partial [Tribolium castaneum]	71.92	6e-167
c12387_g1_i1|m.10931	gi|642923214|ref|XP_008193658.1| PREDICTED: tyrosine-protein kinase transmembrane receptor Ror-like isoform X1 [Tribolium castaneum]	58.38	0
c12388_g1_i1|m.10932	gi|91078238|ref|XP_970108.1| PREDICTED: diphosphomevalonate decarboxylase isoform X2 [Tribolium castaneum]	62.24	5e-171
c12390_g1_i1|m.10936	gi|642928136|ref|XP_008200171.1| PREDICTED: evolutionarily conserved signaling intermediate in Toll pathway, mitochondrial isoform X2 [Tribolium castaneum]	63.9	2e-146
c12394_g1_i1|m.10941	gi|91092464|ref|XP_970082.1| PREDICTED: glycine dehydrogenase (decarboxylating), mitochondrial [Tribolium castaneum]	84.09	0
c12395_g1_i2|m.10942	gi|642911219|ref|XP_008199637.1| PREDICTED: FCH domain only protein 2 isoform X4 [Tribolium castaneum]	76.97	0
c12395_g1_i5|m.10945	gi|642911217|ref|XP_008199631.1| PREDICTED: FCH domain only protein 2 isoform X3 [Tribolium castaneum]	76.83	0
c12396_g1_i1|m.10946	gi|91084595|ref|XP_974201.1| PREDICTED: 39S ribosomal protein L44, mitochondrial [Tribolium castaneum]	49.25	4e-90
c12397_g1_i1|m.10947	gi|642912516|ref|XP_008200897.1| PREDICTED: slit homolog 1 protein [Tribolium castaneum]	88.64	0
c12398_g1_i1|m.10950	gi|91085433|ref|XP_968535.1| PREDICTED: histone chaperone asf1 [Tribolium castaneum]	80.71	9e-114
c12399_g1_i1|m.10951	gi|91077438|ref|XP_966878.1| PREDICTED: transmembrane emp24 domain-containing protein 5 [Tribolium castaneum]	60.7	6e-100
c1240_g1_i1|m.377	gi|642934054|ref|XP_008197622.1| PREDICTED: polycomb group protein Pc isoform X2 [Tribolium castaneum]	52.74	3e-93
c12400_g1_i1|m.10952	gi|642928374|ref|XP_008192717.1| PREDICTED: C-1-tetrahydrofolate synthase, cytoplasmic isoform X1 [Tribolium castaneum]	68.66	0
c12402_g1_i1|m.10955	gi|91081657|ref|XP_969186.1| PREDICTED: tubulin-specific chaperone C [Tribolium castaneum]	54.74	4e-124
c12403_g1_i1|m.10956	gi|642911489|ref|XP_008199445.1| PREDICTED: TBC1 domain family member 22B isoform X1 [Tribolium castaneum]	75.38	0
c12404_g1_i1|m.10957	gi|642924400|ref|XP_008194280.1| PREDICTED: serine/arginine repetitive matrix protein 1 [Tribolium castaneum]	61.41	6e-97
c12405_g1_i5|m.10964	gi|642917681|ref|XP_008191326.1| PREDICTED: poly(A) polymerase type 3 [Tribolium castaneum]	76.57	0
c12407_g1_i1|m.10968	gi|91094027|ref|XP_967626.1| PREDICTED: translocating chain-associated membrane protein 1 isoform X1 [Tribolium castaneum]	68.1	4e-179
c12408_g1_i1|m.10969	gi|91078828|ref|XP_971205.1| PREDICTED: peptidyl-prolyl cis-trans isomerase-like 1 [Tribolium castaneum]	90.23	6e-121
c12408_g2_i1|m.10971	gi|91078826|ref|XP_971080.1| PREDICTED: endoplasmic reticulum mannosyl-oligosaccharide 1,2-alpha-mannosidase [Tribolium castaneum]	83.74	9e-156
c12410_g2_i1|m.10973	gi|642929086|ref|XP_008195685.1| PREDICTED: putative transcription factor SOX-15 isoform X1 [Tribolium castaneum]	67.51	0
c12411_g1_i1|m.10974	gi|91088019|ref|XP_974107.1| PREDICTED: transcription factor A, mitochondrial [Tribolium castaneum]	37.68	6e-37
c12412_g1_i1|m.10976	gi|91087583|ref|XP_971811.1| PREDICTED: nicalin-1 [Tribolium castaneum]	70.26	0
c12413_g1_i2|m.10978	gi|642910887|ref|XP_008193450.1| PREDICTED: calcium-dependent secretion activator isoform X5 [Tribolium castaneum]	94.35	0
c12414_g1_i1|m.10979	gi|91083265|ref|XP_966948.1| PREDICTED: clc-like protein 2 [Tribolium castaneum]	64.38	1e-104
c12415_g1_i1|m.10981	gi|642922873|ref|XP_008200433.1| PREDICTED: dolichyl-diphosphooligosaccharide--protein glycosyltransferase subunit STT3A [Tribolium castaneum]	89.09	0
c12416_g1_i1|m.10982	gi|91076712|ref|XP_972315.1| PREDICTED: protein MAK16 homolog [Tribolium castaneum]	75.17	2e-141
c12417_g1_i1|m.10983	gi|91092858|ref|XP_969365.1| PREDICTED: probable ATP-dependent RNA helicase Dbp73D [Tribolium castaneum]	58.71	0
c12418_g1_i1|m.10986	gi|189235991|ref|XP_972419.2| PREDICTED: dnaJ homolog subfamily B member 14 [Tribolium castaneum]	67.4	0
c1242_g1_i2|m.379	gi|642927734|ref|XP_008195385.1| PREDICTED: 40S ribosomal protein S7 [Tribolium castaneum]	91.05	4e-127
c12420_g1_i1|m.10989	gi|642931088|ref|XP_008196205.1| PREDICTED: partner of Y14 and mago [Tribolium castaneum]	56.5	8e-49
c12421_g1_i2|m.10991	gi|91086043|ref|XP_973506.1| PREDICTED: transmembrane protein 245 [Tribolium castaneum]	58.46	0
c12422_g1_i1|m.10992	gi|642932906|ref|XP_008197181.1| PREDICTED: replication factor C subunit 5 [Tribolium castaneum]	80.18	0
c12426_g2_i1|m.11001	gi|642923410|ref|XP_974378.3| PREDICTED: repressor of RNA polymerase III transcription MAF1 homolog [Tribolium castaneum]	77.53	3e-129
c12427_g1_i1|m.11002	gi|189234024|ref|XP_973053.2| PREDICTED: kinesin-like protein KIF21B [Tribolium castaneum]	71.53	0
c12428_g1_i1|m.11004	gi|642923199|ref|XP_008193652.1| PREDICTED: transmembrane 9 superfamily member 2 [Tribolium castaneum]	83.59	0
c12429_g1_i1|m.11006	gi|91085467|ref|XP_970131.1| PREDICTED: guanine nucleotide-binding protein subunit beta-1 [Tribolium castaneum]	98.53	0
c12430_g1_i2|m.11009	gi|642925259|ref|XP_008194483.1| PREDICTED: uncharacterized protein LOC660239 isoform X3 [Tribolium castaneum]	48.73	2e-102
c12431_g1_i1|m.11011	gi|189239886|ref|XP_969203.2| PREDICTED: protein tweety [Tribolium castaneum]	72.2	0
c12432_g1_i2|m.11014	gi|642939393|ref|XP_008193211.1| PREDICTED: beta-1,4-galactosyltransferase 1 [Tribolium castaneum]	49.5	4e-103
c12433_g1_i1|m.11015	gi|642936134|ref|XP_008198313.1| PREDICTED: ABC transporter G family member 20 isoform X2 [Tribolium castaneum]	86.89	0
c12434_g1_i1|m.11016	gi|642933088|ref|XP_008197255.1| PREDICTED: kelch-like protein 18 [Tribolium castaneum]	80.6	0
c12435_g1_i1|m.11017	gi|642914322|ref|XP_008201632.1| PREDICTED: F-box only protein 6 [Tribolium castaneum]	52.08	1e-104
c12437_g1_i1|m.11020	gi|642921023|ref|XP_008192658.1| PREDICTED: uncharacterized protein LOC663634 isoform X3 [Tribolium castaneum]	63.47	3e-142
c12438_g1_i2|m.11022	gi|642913522|ref|XP_008201049.1| PREDICTED: venom allergen 3-like [Tribolium castaneum]	38.3	1e-27
c12439_g1_i1|m.11023	gi|642919900|ref|XP_008192117.1| PREDICTED: mucin-17 isoform X3 [Tribolium castaneum]	61.64	0
c12441_g1_i1|m.11037	gi|642934945|ref|XP_008195892.1| PREDICTED: uncharacterized protein LOC655224 [Tribolium castaneum]	36.07	4e-100
c12443_g1_i1|m.11040	gi|91089283|ref|XP_970929.1| PREDICTED: protein phosphatase PTC7 homolog [Tribolium castaneum]	87.79	0
c12444_g1_i1|m.11041	gi|642914966|ref|XP_008190462.1| PREDICTED: putative ATPase N2B [Tribolium castaneum]	64.52	0
c12446_g1_i1|m.11043	gi|91095223|ref|XP_970025.1| PREDICTED: protein mos-2 homolog [Tribolium castaneum]	48.04	3e-65
c12447_g1_i2|m.11046	gi|642934668|ref|XP_008197760.1| PREDICTED: nuclear receptor-binding protein homolog [Tribolium castaneum]	79.16	0
c12448_g1_i1|m.11048	gi|189235643|ref|XP_967729.2| PREDICTED: metallophosphoesterase 1 [Tribolium castaneum]	63.08	2e-166
c12449_g1_i1|m.11049	gi|91094931|ref|XP_970563.1| PREDICTED: bifunctional 3'-phosphoadenosine 5'-phosphosulfate synthase [Tribolium castaneum]	81.15	0
c12451_g1_i1|m.11051	gi|189233795|ref|XP_973362.2| PREDICTED: FUN14 domain-containing protein 1-like isoform X1 [Tribolium castaneum]	63.12	2e-73
c12452_g1_i1|m.11053	gi|91093825|ref|XP_969152.1| PREDICTED: methylthioribose-1-phosphate isomerase [Tribolium castaneum]	72.91	0
c12453_g1_i1|m.11054	gi|642933567|ref|XP_008197474.1| PREDICTED: uncharacterized protein LOC103314146 [Tribolium castaneum]	45.57	2e-112
c12455_g1_i1|m.11059	gi|642935097|ref|XP_008197884.1| PREDICTED: probable RNA methyltransferase bin3 isoform X1 [Tribolium castaneum]	63.3	0
c12456_g1_i4|m.11063	gi|189238157|ref|XP_976123.2| PREDICTED: adiponectin receptor protein isoform X2 [Tribolium castaneum]	76.9	0
c12457_g1_i1|m.11064	gi|189239444|ref|XP_001815329.1| PREDICTED: E3 ubiquitin-protein ligase sina [Tribolium castaneum]	30.88	3e-76
c12458_g1_i1|m.11065	gi|642911178|ref|XP_008200613.1| PREDICTED: DNA-directed RNA polymerase II subunit GRINL1A [Tribolium castaneum]	37.04	1e-15
c12458_g1_i1|m.11066	gi|91077852|ref|XP_971951.1| PREDICTED: uncharacterized protein LOC660645 [Tribolium castaneum]	53.5	3e-39
c12459_g1_i1|m.11067	gi|91077834|ref|XP_971265.1| PREDICTED: integrator complex subunit 1 [Tribolium castaneum]	61.27	0
c12460_g1_i1|m.11069	gi|642921163|ref|XP_008192741.1| PREDICTED: sip1/TFIP11 interacting protein isoform X1 [Tribolium castaneum]	71.05	0
c12462_g1_i2|m.11072	gi|642922112|ref|XP_008193020.1| PREDICTED: calcium channel flower isoform X2 [Tribolium castaneum]	63.27	5e-83
c12462_g1_i3|m.11073	gi|642922116|ref|XP_008193022.1| PREDICTED: calcium channel flower isoform X4 [Tribolium castaneum]	67.02	2e-92
c12463_g1_i1|m.11074	gi|642937187|ref|XP_008198730.1| PREDICTED: cuticular protein analogous to peritrophins 1-J isoform X2 [Tribolium castaneum]	36.6	1e-106
c12464_g1_i1|m.11075	gi|91081299|ref|XP_968887.1| PREDICTED: cleft lip and palate transmembrane protein 1 homolog [Tribolium castaneum]	70.73	0
c12465_g1_i2|m.11077	gi|642910918|ref|XP_008193464.1| PREDICTED: microphthalmia-associated transcription factor isoform X2 [Tribolium castaneum]	65.78	2e-157
c12467_g2_i1|m.11081	gi|642939450|ref|XP_008200398.1| PREDICTED: transcription factor E2F2-like [Tribolium castaneum]	50.64	6e-141
c12469_g1_i1|m.11084	gi|642919246|ref|XP_008191792.1| PREDICTED: rhabdoid tumor deletion region protein 1 [Tribolium castaneum]	51.6	7e-74
c12470_g1_i1|m.11085	gi|91090274|ref|XP_970683.1| PREDICTED: phosphoinositide 3-kinase regulatory subunit 4 isoform X1 [Tribolium castaneum]	65.19	0
c12471_g1_i1|m.11086	gi|91079438|ref|XP_968433.1| PREDICTED: protein melted [Tribolium castaneum]	67.98	0
c12472_g1_i1|m.11088	gi|91088233|ref|XP_973769.1| PREDICTED: elongation factor 1-beta' [Tribolium castaneum]	72.73	6e-106
c12473_g1_i1|m.11090	gi|91082953|ref|XP_973566.1| PREDICTED: pyridine nucleotide-disulfide oxidoreductase domain-containing protein 1 [Tribolium castaneum]	65.45	0
c12473_g1_i1|m.11091	gi|189237400|ref|XP_001815071.1| PREDICTED: 28S ribosomal protein S18b, mitochondrial [Tribolium castaneum]	65.75	4e-81
c12474_g1_i1|m.11092	gi|642915763|ref|XP_008200070.1| PREDICTED: cleft lip and palate transmembrane protein 1-like protein [Tribolium castaneum]	61.93	0
c12475_g1_i1|m.11093	gi|642912025|ref|XP_008199064.1| PREDICTED: aldose 1-epimerase-like isoform X1 [Tribolium castaneum]	66.39	9e-175
c12475_g2_i3|m.11095	gi|642912029|ref|XP_008199066.1| PREDICTED: LOW QUALITY PROTEIN: patched domain-containing protein 3-like [Tribolium castaneum]	59.25	0
c12476_g1_i1|m.11097	gi|642937898|ref|XP_008200348.1| PREDICTED: protein vav isoform X2 [Tribolium castaneum]	61.45	0
c12477_g1_i1|m.11098	gi|91088079|ref|XP_968378.1| PREDICTED: mediator of RNA polymerase II transcription subunit 30 [Tribolium castaneum]	65.51	6e-126
c12478_g1_i1|m.11099	gi|91087239|ref|XP_975511.1| PREDICTED: eukaryotic initiation factor 4A-III [Tribolium castaneum]	93.56	0
c12479_g1_i1|m.11100	gi|189241787|ref|XP_969759.2| PREDICTED: cell division cycle protein 16 homolog [Tribolium castaneum]	63.75	0
c12479_g1_i1|m.11101	gi|91091438|ref|XP_972410.1| PREDICTED: protein ST7 homolog [Tribolium castaneum]	92.7	0
c12480_g1_i1|m.11102	gi|642923393|ref|XP_008193730.1| PREDICTED: facilitated trehalose transporter Tret1 isoform X1 [Tribolium castaneum]	52.67	0
c12481_g1_i1|m.11103	gi|91082525|ref|XP_973459.1| PREDICTED: circadian clock-controlled protein [Tribolium castaneum]	36	6e-51
c12483_g1_i1|m.11105	gi|91086281|ref|XP_973404.1| PREDICTED: alpha-N-acetylgalactosaminidase-like [Tribolium castaneum]	59.1	0
c12484_g1_i1|m.11106	gi|642934210|ref|XP_967287.2| PREDICTED: uncharacterized protein C34C12.4 [Tribolium castaneum]	45.56	2e-19
c12485_g1_i1|m.11107	gi|642929315|ref|XP_008195783.1| PREDICTED: uncharacterized protein LOC103312132 [Tribolium castaneum]	52.75	8e-144
[truncated: 6,021 more rows]
